# Supplementary material
Source: publisher figshare collection journal article supplement (https://acs.figshare.com/ndownloader/files/4616410)
Supplement: Supplementary file 1 [file 4616410]

HEADER    RHODOPSIN-LIKE G-PROTEIN COUPLED RECEPTOR MODEL            25-04-2008
TITLE     HUMAN GONADOTROPIN-RELEASING HORMONE RECEPTOR IN A DPPC BILAYER 
SOURCE   2 ORGANISM: HOMO SAPINS;
SOURCE   4 ORGAN: BRAIN;   
SOURCE   5 TISSUE: HYPOPHYSIS;
SOURCE   6 CELL: GONADOTROPES;       
KEYWDS    GPCR, MOLECULAR DYNAMICS SIMULATION, DPPC, MEMBRANE PROTEIN, GNRHR 
EXPDTA    THEORETICAL MODEL (323 K)                                              
AUTHOR    E. JARDON-VALADEZ, A. ULLOA-AGUIRRE & A. PINEIRO             
REVDAT   1   20-JAN-08 XXX    0                                                
JRNL        AUTH   E. JARDON-VALADEZ, A. ULLOA-AGUIRRE & A. PINEIRO
JRNL        TITL   MODELING AND MOLECULAR DYNAMICS SIMULATION OF THE HUMAN 
JNRL        TITL 2 GONADOTROPIN-RELEASING HORMONE RECEPTOR IN A LIPID BILAYER
CRYST1   76.320   76.320  130.710  90.00  90.00  90.00 P 1           1
MODEL        1
ATOM      1  N   MET A   1      68.110  57.120  91.930  1.00  0.00
ATOM      2  H1  MET A   1      68.150  57.690  92.750  1.00  0.00
ATOM      3  H2  MET A   1      67.200  56.700  91.870  1.00  0.00
ATOM      4  H3  MET A   1      68.900  56.500  91.940  1.00  0.00
ATOM      5  CA  MET A   1      68.320  58.090  90.840  1.00  0.00
ATOM      6  CB  MET A   1      67.400  57.840  89.640  1.00  0.00
ATOM      7  CG  MET A   1      68.050  57.090  88.480  1.00  0.00
ATOM      8  SD  MET A   1      68.620  55.400  88.870  1.00  0.00
ATOM      9  CE  MET A   1      67.200  54.400  88.510  1.00  0.00
ATOM     10  C   MET A   1      68.100  59.530  91.290  1.00  0.00
ATOM     11  O   MET A   1      67.440  59.710  92.320  1.00  0.00
ATOM     12  N   ALA A   2      68.660  60.470  90.520  1.00  0.00
ATOM     13  H   ALA A   2      69.190  60.250  89.710  1.00  0.00
ATOM     14  CA  ALA A   2      68.830  61.880  90.880  1.00  0.00
ATOM     15  CB  ALA A   2      70.310  62.170  91.150  1.00  0.00
ATOM     16  C   ALA A   2      68.460  62.800  89.720  1.00  0.00
ATOM     17  O   ALA A   2      69.280  63.070  88.840  1.00  0.00
ATOM     18  N   ASN A   3      67.230  63.290  89.710  1.00  0.00
ATOM     19  H   ASN A   3      67.150  64.220  89.370  1.00  0.00
ATOM     20  CA  ASN A   3      66.070  63.010  90.580  1.00  0.00
ATOM     21  CB  ASN A   3      65.530  64.410  90.890  1.00  0.00
ATOM     22  CG  ASN A   3      66.310  65.190  91.960  1.00  0.00
ATOM     23  OD1 ASN A   3      66.710  64.760  93.040  1.00  0.00
ATOM     24  ND2 ASN A   3      66.530  66.460  91.630  1.00  0.00
ATOM     25 HD21 ASN A   3      66.080  66.910  90.860  1.00  0.00
ATOM     26 HD22 ASN A   3      67.040  66.970  92.320  1.00  0.00
ATOM     27  C   ASN A   3      65.040  62.040  89.990  1.00  0.00
ATOM     28  O   ASN A   3      64.740  61.980  88.800  1.00  0.00
ATOM     29  N   SER A   4      64.700  61.080  90.830  1.00  0.00
ATOM     30  H   SER A   4      64.810  61.300  91.800  1.00  0.00
ATOM     31  CA  SER A   4      63.930  59.870  90.470  1.00  0.00
ATOM     32  CB  SER A   4      64.000  58.880  91.640  1.00  0.00
ATOM     33  OG  SER A   4      63.310  59.400  92.780  1.00  0.00
ATOM     34  HG  SER A   4      63.920  60.070  93.200  1.00  0.00
ATOM     35  C   SER A   4      62.490  60.130  90.020  1.00  0.00
ATOM     36  O   SER A   4      61.870  61.000  90.620  1.00  0.00
ATOM     37  N   ALA A   5      61.900  59.500  89.010  1.00  0.00
ATOM     38  H   ALA A   5      62.420  58.870  88.430  1.00  0.00
ATOM     39  CA  ALA A   5      60.500  59.630  88.570  1.00  0.00
ATOM     40  CB  ALA A   5      60.290  59.880  87.080  1.00  0.00
ATOM     41  C   ALA A   5      59.630  58.400  88.840  1.00  0.00
ATOM     42  O   ALA A   5      59.960  57.330  88.340  1.00  0.00
ATOM     43  N   SER A   6      58.680  58.540  89.750  1.00  0.00
ATOM     44  H   SER A   6      58.400  59.420  90.140  1.00  0.00
ATOM     45  CA  SER A   6      57.840  57.410  90.180  1.00  0.00
ATOM     46  CB  SER A   6      58.490  56.570  91.290  1.00  0.00
ATOM     47  OG  SER A   6      58.840  57.250  92.500  1.00  0.00
ATOM     48  HG  SER A   6      58.140  57.880  92.850  1.00  0.00
ATOM     49  C   SER A   6      56.530  58.040  90.640  1.00  0.00
ATOM     50  O   SER A   6      56.500  58.480  91.790  1.00  0.00
ATOM     51  N   PRO A   7      55.490  57.990  89.810  1.00  0.00
ATOM     52  CA  PRO A   7      54.100  58.320  90.150  1.00  0.00
ATOM     53  CB  PRO A   7      53.450  58.470  88.780  1.00  0.00
ATOM     54  CG  PRO A   7      54.160  57.490  87.840  1.00  0.00
ATOM     55  CD  PRO A   7      55.570  57.460  88.440  1.00  0.00
ATOM     56  C   PRO A   7      53.460  57.240  91.020  1.00  0.00
ATOM     57  O   PRO A   7      54.060  56.320  91.580  1.00  0.00
ATOM     58  N   GLU A   8      52.240  57.580  91.430  1.00  0.00
ATOM     59  H   GLU A   8      51.780  58.420  91.160  1.00  0.00
ATOM     60  CA  GLU A   8      51.440  56.720  92.320  1.00  0.00
ATOM     61  CB  GLU A   8      50.510  57.410  93.330  1.00  0.00
ATOM     62  CG  GLU A   8      49.540  58.400  92.690  1.00  0.00
ATOM     63  CD  GLU A   8      49.990  59.750  92.130  1.00  0.00
ATOM     64  OE1 GLU A   8      50.280  60.710  92.880  1.00  0.00
ATOM     65  OE2 GLU A   8      50.280  59.730  90.910  1.00  0.00
ATOM     66  C   GLU A   8      50.760  55.580  91.570  1.00  0.00
ATOM     67  O   GLU A   8      50.410  55.770  90.410  1.00  0.00
ATOM     68  N   GLN A   9      50.760  54.420  92.220  1.00  0.00
ATOM     69  H   GLN A   9      51.420  54.260  92.950  1.00  0.00
ATOM     70  CA  GLN A   9      50.060  53.270  91.620  1.00  0.00
ATOM     71  CB  GLN A   9      50.380  52.100  92.550  1.00  0.00
ATOM     72  CG  GLN A   9      51.810  51.560  92.430  1.00  0.00
ATOM     73  CD  GLN A   9      52.160  50.350  93.300  1.00  0.00
ATOM     74  OE1 GLN A   9      51.390  49.480  93.700  1.00  0.00
ATOM     75  NE2 GLN A   9      53.400  50.230  93.780  1.00  0.00
ATOM     76 HE21 GLN A   9      54.060  50.870  93.400  1.00  0.00
ATOM     77 HE22 GLN A   9      53.620  49.530  94.460  1.00  0.00
ATOM     78  C   GLN A   9      48.560  53.400  91.320  1.00  0.00
ATOM     79  O   GLN A   9      47.870  53.680  92.300  1.00  0.00
ATOM     80  N   ASN A  10      48.210  53.010  90.100  1.00  0.00
ATOM     81  H   ASN A  10      48.940  52.640  89.530  1.00  0.00
ATOM     82  CA  ASN A  10      46.850  52.940  89.550  1.00  0.00
ATOM     83  CB  ASN A  10      46.630  53.760  88.270  1.00  0.00
ATOM     84  CG  ASN A  10      46.510  55.250  88.600  1.00  0.00
ATOM     85  OD1 ASN A  10      47.080  56.090  87.900  1.00  0.00
ATOM     86  ND2 ASN A  10      45.350  55.650  89.110  1.00  0.00
ATOM     87 HD21 ASN A  10      44.590  55.040  89.340  1.00  0.00
ATOM     88 HD22 ASN A  10      45.230  56.640  89.140  1.00  0.00
ATOM     89  C   ASN A  10      46.570  51.460  89.320  1.00  0.00
ATOM     90  O   ASN A  10      46.930  50.850  88.310  1.00  0.00
ATOM     91  N   GLN A  11      45.550  51.040  90.070  1.00  0.00
ATOM     92  H   GLN A  11      45.210  51.500  90.880  1.00  0.00
ATOM     93  CA  GLN A  11      45.130  49.640  89.980  1.00  0.00
ATOM     94  CB  GLN A  11      46.050  48.990  91.030  1.00  0.00
ATOM     95  CG  GLN A  11      45.920  47.470  91.020  1.00  0.00
ATOM     96  CD  GLN A  11      46.810  46.770  92.050  1.00  0.00
ATOM     97  OE1 GLN A  11      47.980  46.700  91.670  1.00  0.00
ATOM     98  NE2 GLN A  11      46.340  46.370  93.230  1.00  0.00
ATOM     99 HE21 GLN A  11      45.440  46.650  93.560  1.00  0.00
ATOM    100 HE22 GLN A  11      46.960  45.880  93.840  1.00  0.00
ATOM    101  C   GLN A  11      43.640  49.360  90.170  1.00  0.00
ATOM    102  O   GLN A  11      43.060  48.900  89.180  1.00  0.00
ATOM    103  N   ASN A  12      42.960  49.860  91.200  1.00  0.00
ATOM    104  H   ASN A  12      43.350  50.640  91.690  1.00  0.00
ATOM    105  CA  ASN A  12      41.580  49.510  91.550  1.00  0.00
ATOM    106  CB  ASN A  12      41.190  50.270  92.820  1.00  0.00
ATOM    107  CG  ASN A  12      40.940  51.760  92.620  1.00  0.00
ATOM    108  OD1 ASN A  12      41.330  52.400  91.640  1.00  0.00
ATOM    109  ND2 ASN A  12      39.980  52.340  93.330  1.00  0.00
ATOM    110 HD21 ASN A  12      39.760  53.290  93.080  1.00  0.00
ATOM    111 HD22 ASN A  12      39.520  51.800  94.030  1.00  0.00
ATOM    112  C   ASN A  12      40.510  49.770  90.490  1.00  0.00
ATOM    113  O   ASN A  12      39.510  49.060  90.470  1.00  0.00
ATOM    114  N   HIS A  13      40.850  50.480  89.420  1.00  0.00
ATOM    115  H   HIS A  13      41.820  50.650  89.270  1.00  0.00
ATOM    116  CA  HIS A  13      39.920  50.850  88.340  1.00  0.00
ATOM    117  CB  HIS A  13      39.670  52.360  88.290  1.00  0.00
ATOM    118  CG  HIS A  13      38.470  52.900  87.510  1.00  0.00
ATOM    119  ND1 HIS A  13      37.240  52.420  87.540  1.00  0.00
ATOM    120  CD2 HIS A  13      38.510  53.790  86.520  1.00  0.00
ATOM    121  HD2 HIS A  13      38.400  54.850  86.730  1.00  0.00
ATOM    122  CE1 HIS A  13      36.620  53.100  86.580  1.00  0.00
ATOM    123  HE1 HIS A  13      35.580  53.050  86.260  1.00  0.00
ATOM    124  NE2 HIS A  13      37.550  53.400  85.680  1.00  0.00
ATOM    125  HE2 HIS A  13      37.530  53.520  84.690  1.00  0.00
ATOM    126  C   HIS A  13      40.270  50.240  86.980  1.00  0.00
ATOM    127  O   HIS A  13      41.370  49.760  86.720  1.00  0.00
ATOM    128  N   CYS A  14      39.180  50.180  86.220  1.00  0.00
ATOM    129  H   CYS A  14      38.310  50.590  86.510  1.00  0.00
ATOM    130  CA  CYS A  14      39.110  49.630  84.860  1.00  0.00
ATOM    131  CB  CYS A  14      38.290  48.350  84.930  1.00  0.00
ATOM    132  SG  CYS A  14      37.970  47.590  83.300  1.00  0.00
ATOM    133  C   CYS A  14      38.630  50.630  83.800  1.00  0.00
ATOM    134  O   CYS A  14      37.520  51.150  83.930  1.00  0.00
ATOM    135  N   SER A  15      39.450  51.130  82.880  1.00  0.00
ATOM    136  H   SER A  15      39.010  51.590  82.110  1.00  0.00
ATOM    137  CA  SER A  15      40.920  51.110  82.820  1.00  0.00
ATOM    138  CB  SER A  15      41.540  51.350  81.440  1.00  0.00
ATOM    139  OG  SER A  15      41.390  50.190  80.630  1.00  0.00
ATOM    140  HG  SER A  15      40.530  50.170  80.110  1.00  0.00
ATOM    141  C   SER A  15      41.610  52.190  83.670  1.00  0.00
ATOM    142  O   SER A  15      41.190  53.340  83.580  1.00  0.00
ATOM    143  N   ALA A  16      42.810  51.920  84.180  1.00  0.00
ATOM    144  H   ALA A  16      43.050  50.960  84.330  1.00  0.00
ATOM    145  CA  ALA A  16      43.610  52.890  84.940  1.00  0.00
ATOM    146  CB  ALA A  16      43.650  52.470  86.410  1.00  0.00
ATOM    147  C   ALA A  16      44.980  53.350  84.440  1.00  0.00
ATOM    148  O   ALA A  16      45.960  52.600  84.520  1.00  0.00
ATOM    149  N   ILE A  17      44.900  54.390  83.620  1.00  0.00
ATOM    150  H   ILE A  17      44.080  54.940  83.470  1.00  0.00
ATOM    151  CA  ILE A  17      46.000  54.990  82.850  1.00  0.00
ATOM    152  CB  ILE A  17      45.470  55.360  81.460  1.00  0.00
ATOM    153  CG1 ILE A  17      44.740  54.160  80.850  1.00  0.00
ATOM    154  CG2 ILE A  17      46.760  55.630  80.680  1.00  0.00
ATOM    155  CD  ILE A  17      44.010  54.430  79.530  1.00  0.00
ATOM    156  C   ILE A  17      46.560  56.130  83.690  1.00  0.00
ATOM    157  O   ILE A  17      45.860  57.110  83.930  1.00  0.00
ATOM    158  N   ASN A  18      47.870  56.010  83.880  1.00  0.00
ATOM    159  H   ASN A  18      48.370  55.200  83.570  1.00  0.00
ATOM    160  CA  ASN A  18      48.600  56.810  84.890  1.00  0.00
ATOM    161  CB  ASN A  18      50.050  56.330  84.870  1.00  0.00
ATOM    162  CG  ASN A  18      50.660  56.680  86.230  1.00  0.00
ATOM    163  OD1 ASN A  18      50.990  57.830  86.480  1.00  0.00
ATOM    164  ND2 ASN A  18      50.540  55.890  87.290  1.00  0.00
ATOM    165 HD21 ASN A  18      50.190  54.950  87.190  1.00  0.00
ATOM    166 HD22 ASN A  18      50.720  56.250  88.200  1.00  0.00
ATOM    167  C   ASN A  18      48.570  58.320  84.640  1.00  0.00
ATOM    168  O   ASN A  18      48.800  58.740  83.510  1.00  0.00
ATOM    169  N   ASN A  19      47.880  58.970  85.580  1.00  0.00
ATOM    170  H   ASN A  19      47.520  58.310  86.250  1.00  0.00
ATOM    171  CA  ASN A  19      47.630  60.420  85.550  1.00  0.00
ATOM    172  CB  ASN A  19      48.870  61.070  86.170  1.00  0.00
ATOM    173  CG  ASN A  19      49.130  60.890  87.670  1.00  0.00
ATOM    174  OD1 ASN A  19      48.810  61.730  88.510  1.00  0.00
ATOM    175  ND2 ASN A  19      49.640  59.750  88.130  1.00  0.00
ATOM    176 HD21 ASN A  19      49.970  59.780  89.070  1.00  0.00
ATOM    177 HD22 ASN A  19      50.210  59.120  87.610  1.00  0.00
ATOM    178  C   ASN A  19      46.900  61.110  84.400  1.00  0.00
ATOM    179  O   ASN A  19      46.780  62.330  84.310  1.00  0.00
ATOM    180  N   SER A  20      46.330  60.350  83.480  1.00  0.00
ATOM    181  H   SER A  20      46.310  59.360  83.650  1.00  0.00
ATOM    182  CA  SER A  20      45.750  60.810  82.210  1.00  0.00
ATOM    183  CB  SER A  20      46.570  60.330  81.010  1.00  0.00
ATOM    184  OG  SER A  20      47.050  59.000  81.230  1.00  0.00
ATOM    185  HG  SER A  20      47.920  59.020  81.720  1.00  0.00
ATOM    186  C   SER A  20      44.240  60.590  82.080  1.00  0.00
ATOM    187  O   SER A  20      43.490  61.480  82.460  1.00  0.00
ATOM    188  N   ILE A  21      43.960  59.310  81.840  1.00  0.00
ATOM    189  H   ILE A  21      44.670  58.600  81.820  1.00  0.00
ATOM    190  CA  ILE A  21      42.550  58.920  81.710  1.00  0.00
ATOM    191  CB  ILE A  21      42.040  59.140  80.280  1.00  0.00
ATOM    192  CG1 ILE A  21      40.520  59.220  80.150  1.00  0.00
ATOM    193  CG2 ILE A  21      42.560  58.050  79.350  1.00  0.00
ATOM    194  CD  ILE A  21      40.040  60.520  80.800  1.00  0.00
ATOM    195  C   ILE A  21      42.180  57.640  82.470  1.00  0.00
ATOM    196  O   ILE A  21      42.550  56.520  82.110  1.00  0.00
ATOM    197  N   PRO A  22      41.590  57.860  83.640  1.00  0.00
ATOM    198  CA  PRO A  22      40.800  56.770  84.230  1.00  0.00
ATOM    199  CB  PRO A  22      40.560  57.230  85.670  1.00  0.00
ATOM    200  CG  PRO A  22      41.700  58.220  85.880  1.00  0.00
ATOM    201  CD  PRO A  22      41.810  58.990  84.560  1.00  0.00
ATOM    202  C   PRO A  22      39.500  56.560  83.450  1.00  0.00
ATOM    203  O   PRO A  22      38.770  57.530  83.260  1.00  0.00
ATOM    204  N   LEU A  23      39.430  55.480  82.670  1.00  0.00
ATOM    205  H   LEU A  23      40.070  54.720  82.780  1.00  0.00
ATOM    206  CA  LEU A  23      38.350  55.250  81.690  1.00  0.00
ATOM    207  CB  LEU A  23      38.770  54.210  80.650  1.00  0.00
ATOM    208  CG  LEU A  23      39.780  54.880  79.720  1.00  0.00
ATOM    209  CD1 LEU A  23      40.580  53.910  78.860  1.00  0.00
ATOM    210  CD2 LEU A  23      39.050  55.900  78.830  1.00  0.00
ATOM    211  C   LEU A  23      36.980  54.900  82.270  1.00  0.00
ATOM    212  O   LEU A  23      36.850  54.030  83.130  1.00  0.00
ATOM    213  N   MET A  24      35.900  55.620  81.990  1.00  0.00
ATOM    214  H   MET A  24      35.030  55.330  82.390  1.00  0.00
ATOM    215  CA  MET A  24      35.850  56.920  81.300  1.00  0.00
ATOM    216  CB  MET A  24      34.900  56.820  80.100  1.00  0.00
ATOM    217  CG  MET A  24      34.740  58.170  79.390  1.00  0.00
ATOM    218  SD  MET A  24      36.340  58.890  78.860  1.00  0.00
ATOM    219  CE  MET A  24      36.340  58.410  77.150  1.00  0.00
ATOM    220  C   MET A  24      35.370  58.060  82.210  1.00  0.00
ATOM    221  O   MET A  24      34.280  57.930  82.770  1.00  0.00
ATOM    222  N   GLN A  25      36.320  58.920  82.550  1.00  0.00
ATOM    223  H   GLN A  25      37.290  58.790  82.340  1.00  0.00
ATOM    224  CA  GLN A  25      36.110  60.070  83.440  1.00  0.00
ATOM    225  CB  GLN A  25      37.480  60.760  83.460  1.00  0.00
ATOM    226  CG  GLN A  25      37.650  61.700  84.660  1.00  0.00
ATOM    227  CD  GLN A  25      39.110  62.090  84.910  1.00  0.00
ATOM    228  OE1 GLN A  25      39.640  61.770  85.970  1.00  0.00
ATOM    229  NE2 GLN A  25      39.800  62.620  83.910  1.00  0.00
ATOM    230 HE21 GLN A  25      40.730  62.910  84.120  1.00  0.00
ATOM    231 HE22 GLN A  25      39.550  62.700  82.940  1.00  0.00
ATOM    232  C   GLN A  25      35.070  61.100  83.000  1.00  0.00
ATOM    233  O   GLN A  25      35.310  61.970  82.160  1.00  0.00
ATOM    234  N   GLY A  26      33.890  61.100  83.600  1.00  0.00
ATOM    235  H   GLY A  26      33.610  60.440  84.300  1.00  0.00
ATOM    236  CA  GLY A  26      32.690  61.840  83.160  1.00  0.00
ATOM    237  C   GLY A  26      31.790  60.910  82.350  1.00  0.00
ATOM    238  O   GLY A  26      31.570  61.220  81.180  1.00  0.00
ATOM    239  N   ASN A  27      31.190  59.970  83.070  1.00  0.00
ATOM    240  H   ASN A  27      31.170  59.970  84.070  1.00  0.00
ATOM    241  CA  ASN A  27      30.280  58.930  82.570  1.00  0.00
ATOM    242  CB  ASN A  27      30.960  57.570  82.700  1.00  0.00
ATOM    243  CG  ASN A  27      30.270  56.290  82.230  1.00  0.00
ATOM    244  OD1 ASN A  27      30.640  55.780  81.170  1.00  0.00
ATOM    245  ND2 ASN A  27      29.620  55.670  83.210  1.00  0.00
ATOM    246 HD21 ASN A  27      29.700  55.950  84.160  1.00  0.00
ATOM    247 HD22 ASN A  27      29.330  54.740  82.950  1.00  0.00
ATOM    248  C   ASN A  27      28.960  59.030  83.340  1.00  0.00
ATOM    249  O   ASN A  27      28.960  59.480  84.480  1.00  0.00
ATOM    250  N   LEU A  28      27.850  58.740  82.660  1.00  0.00
ATOM    251  H   LEU A  28      27.970  58.400  81.720  1.00  0.00
ATOM    252  CA  LEU A  28      26.470  58.720  83.160  1.00  0.00
ATOM    253  CB  LEU A  28      25.470  59.520  82.320  1.00  0.00
ATOM    254  CG  LEU A  28      25.660  61.020  82.600  1.00  0.00
ATOM    255  CD1 LEU A  28      25.080  61.940  81.520  1.00  0.00
ATOM    256  CD2 LEU A  28      24.970  61.430  83.900  1.00  0.00
ATOM    257  C   LEU A  28      25.820  57.450  83.720  1.00  0.00
ATOM    258  O   LEU A  28      25.350  57.520  84.850  1.00  0.00
ATOM    259  N   PRO A  29      25.720  56.330  83.010  1.00  0.00
ATOM    260  CA  PRO A  29      25.150  55.110  83.610  1.00  0.00
ATOM    261  CB  PRO A  29      24.780  54.230  82.410  1.00  0.00
ATOM    262  CG  PRO A  29      25.720  54.650  81.280  1.00  0.00
ATOM    263  CD  PRO A  29      26.080  56.100  81.610  1.00  0.00
ATOM    264  C   PRO A  29      26.010  54.410  84.660  1.00  0.00
ATOM    265  O   PRO A  29      27.180  54.760  84.800  1.00  0.00
ATOM    266  N   THR A  30      25.320  53.540  85.400  1.00  0.00
ATOM    267  H   THR A  30      24.350  53.280  85.320  1.00  0.00
ATOM    268  CA  THR A  30      25.980  52.770  86.460  1.00  0.00
ATOM    269  CB  THR A  30      25.310  52.740  87.830  1.00  0.00
ATOM    270  OG1 THR A  30      23.910  52.800  87.530  1.00  0.00
ATOM    271  HG1 THR A  30      23.720  53.580  88.130  1.00  0.00
ATOM    272  CG2 THR A  30      25.600  53.990  88.660  1.00  0.00
ATOM    273  C   THR A  30      26.180  51.330  85.990  1.00  0.00
ATOM    274  O   THR A  30      27.240  50.790  86.290  1.00  0.00
ATOM    275  N   LEU A  31      25.310  50.840  85.120  1.00  0.00
ATOM    276  H   LEU A  31      24.410  51.270  85.040  1.00  0.00
ATOM    277  CA  LEU A  31      25.540  49.660  84.270  1.00  0.00
ATOM    278  CB  LEU A  31      24.220  49.530  83.500  1.00  0.00
ATOM    279  CG  LEU A  31      23.950  48.190  82.810  1.00  0.00
ATOM    280  CD1 LEU A  31      23.780  47.080  83.850  1.00  0.00
ATOM    281  CD2 LEU A  31      22.810  48.390  81.810  1.00  0.00
ATOM    282  C   LEU A  31      26.700  49.680  83.270  1.00  0.00
ATOM    283  O   LEU A  31      26.790  50.590  82.450  1.00  0.00
ATOM    284  N   THR A  32      27.370  48.540  83.280  1.00  0.00
ATOM    285  H   THR A  32      27.110  47.740  83.820  1.00  0.00
ATOM    286  CA  THR A  32      28.590  48.290  82.500  1.00  0.00
ATOM    287  CB  THR A  32      29.480  47.220  83.140  1.00  0.00
ATOM    288  OG1 THR A  32      28.830  45.960  83.320  1.00  0.00
ATOM    289  HG1 THR A  32      29.250  45.470  84.080  1.00  0.00
ATOM    290  CG2 THR A  32      29.920  47.720  84.510  1.00  0.00
ATOM    291  C   THR A  32      28.250  47.900  81.060  1.00  0.00
ATOM    292  O   THR A  32      27.580  46.910  80.780  1.00  0.00
ATOM    293  N   LEU A  33      28.420  48.900  80.190  1.00  0.00
ATOM    294  H   LEU A  33      29.000  49.690  80.410  1.00  0.00
ATOM    295  CA  LEU A  33      28.050  48.830  78.770  1.00  0.00
ATOM    296  CB  LEU A  33      27.860  50.200  78.130  1.00  0.00
ATOM    297  CG  LEU A  33      26.850  50.960  78.980  1.00  0.00
ATOM    298  CD1 LEU A  33      26.860  52.420  78.520  1.00  0.00
ATOM    299  CD2 LEU A  33      25.490  50.280  78.830  1.00  0.00
ATOM    300  C   LEU A  33      29.070  48.050  77.940  1.00  0.00
ATOM    301  O   LEU A  33      28.640  47.550  76.900  1.00  0.00
ATOM    302  N   SER A  34      30.360  48.320  78.130  1.00  0.00
ATOM    303  H   SER A  34      30.690  48.920  78.850  1.00  0.00
ATOM    304  CA  SER A  34      31.410  47.820  77.230  1.00  0.00
ATOM    305  CB  SER A  34      32.810  48.080  77.760  1.00  0.00
ATOM    306  OG  SER A  34      33.110  47.160  78.820  1.00  0.00
ATOM    307  HG  SER A  34      33.560  47.590  79.610  1.00  0.00
ATOM    308  C   SER A  34      31.260  46.450  76.560  1.00  0.00
ATOM    309  O   SER A  34      31.460  46.310  75.360  1.00  0.00
ATOM    310  N   GLY A  35      31.240  45.430  77.410  1.00  0.00
ATOM    311  H   GLY A  35      31.070  45.630  78.380  1.00  0.00
ATOM    312  CA  GLY A  35      31.100  44.010  77.050  1.00  0.00
ATOM    313  C   GLY A  35      29.790  43.700  76.320  1.00  0.00
ATOM    314  O   GLY A  35      29.820  43.040  75.290  1.00  0.00
ATOM    315  N   LYS A  36      28.760  44.390  76.830  1.00  0.00
ATOM    316  H   LYS A  36      28.870  45.080  77.540  1.00  0.00
ATOM    317  CA  LYS A  36      27.440  44.480  76.200  1.00  0.00
ATOM    318  CB  LYS A  36      26.530  45.080  77.270  1.00  0.00
ATOM    319  CG  LYS A  36      26.470  44.280  78.570  1.00  0.00
ATOM    320  CD  LYS A  36      25.430  44.990  79.450  1.00  0.00
ATOM    321  CE  LYS A  36      25.260  44.320  80.810  1.00  0.00
ATOM    322  NZ  LYS A  36      26.420  44.490  81.700  1.00  0.00
ATOM    323  HZ1 LYS A  36      26.810  45.410  81.600  1.00  0.00
ATOM    324  HZ2 LYS A  36      26.140  44.380  82.650  1.00  0.00
ATOM    325  HZ3 LYS A  36      27.110  43.860  81.360  1.00  0.00
ATOM    326  C   LYS A  36      27.370  45.080  74.790  1.00  0.00
ATOM    327  O   LYS A  36      26.420  44.920  74.020  1.00  0.00
ATOM    328  N   ILE A  37      28.300  46.010  74.590  1.00  0.00
ATOM    329  H   ILE A  37      28.500  46.630  75.350  1.00  0.00
ATOM    330  CA  ILE A  37      28.580  46.630  73.290  1.00  0.00
ATOM    331  CB  ILE A  37      29.080  48.070  73.140  1.00  0.00
ATOM    332  CG1 ILE A  37      28.280  49.070  73.990  1.00  0.00
ATOM    333  CG2 ILE A  37      29.110  48.470  71.670  1.00  0.00
ATOM    334  CD  ILE A  37      27.990  50.500  73.540  1.00  0.00
ATOM    335  C   ILE A  37      29.340  45.630  72.430  1.00  0.00
ATOM    336  O   ILE A  37      28.890  45.370  71.320  1.00  0.00
ATOM    337  N   ARG A  38      30.420  45.100  73.000  1.00  0.00
ATOM    338  H   ARG A  38      30.820  45.450  73.840  1.00  0.00
ATOM    339  CA  ARG A  38      31.230  44.110  72.280  1.00  0.00
ATOM    340  CB  ARG A  38      32.410  43.540  73.080  1.00  0.00
ATOM    341  CG  ARG A  38      33.490  44.540  73.480  1.00  0.00
ATOM    342  CD  ARG A  38      34.530  43.950  74.440  1.00  0.00
ATOM    343  NE  ARG A  38      35.260  42.720  74.090  1.00  0.00
ATOM    344  HE  ARG A  38      34.650  41.930  74.160  1.00  0.00
ATOM    345  CZ  ARG A  38      36.510  42.690  73.620  1.00  0.00
ATOM    346  NH1 ARG A  38      37.230  43.810  73.470  1.00  0.00
ATOM    347 HH11 ARG A  38      36.720  44.670  73.580  1.00  0.00
ATOM    348 HH12 ARG A  38      38.220  43.750  73.570  1.00  0.00
ATOM    349  NH2 ARG A  38      36.810  41.720  72.740  1.00  0.00
ATOM    350 HH21 ARG A  38      36.170  41.010  72.460  1.00  0.00
ATOM    351 HH22 ARG A  38      37.790  41.520  72.650  1.00  0.00
ATOM    352  C   ARG A  38      30.360  42.980  71.710  1.00  0.00
ATOM    353  O   ARG A  38      30.530  42.710  70.520  1.00  0.00
ATOM    354  N   VAL A  39      29.590  42.270  72.520  1.00  0.00
ATOM    355  H   VAL A  39      29.690  42.310  73.510  1.00  0.00
ATOM    356  CA  VAL A  39      28.610  41.290  72.020  1.00  0.00
ATOM    357  CB  VAL A  39      28.010  40.430  73.140  1.00  0.00
ATOM    358  CG1 VAL A  39      26.680  40.900  73.740  1.00  0.00
ATOM    359  CG2 VAL A  39      27.870  39.040  72.500  1.00  0.00
ATOM    360  C   VAL A  39      27.630  41.860  70.990  1.00  0.00
ATOM    361  O   VAL A  39      27.770  41.460  69.830  1.00  0.00
ATOM    362  N   THR A  40      26.980  43.000  71.200  1.00  0.00
ATOM    363  H   THR A  40      27.290  43.630  71.910  1.00  0.00
ATOM    364  CA  THR A  40      26.070  43.470  70.150  1.00  0.00
ATOM    365  CB  THR A  40      25.080  44.540  70.610  1.00  0.00
ATOM    366  OG1 THR A  40      25.870  45.390  71.450  1.00  0.00
ATOM    367  HG1 THR A  40      25.750  45.130  72.410  1.00  0.00
ATOM    368  CG2 THR A  40      23.870  43.870  71.260  1.00  0.00
ATOM    369  C   THR A  40      26.640  43.910  68.800  1.00  0.00
ATOM    370  O   THR A  40      26.240  43.520  67.700  1.00  0.00
ATOM    371  N   VAL A  41      27.500  44.920  68.830  1.00  0.00
ATOM    372  H   VAL A  41      27.920  45.170  69.710  1.00  0.00
ATOM    373  CA  VAL A  41      28.040  45.510  67.600  1.00  0.00
ATOM    374  CB  VAL A  41      28.900  46.720  67.980  1.00  0.00
ATOM    375  CG1 VAL A  41      30.190  46.330  68.710  1.00  0.00
ATOM    376  CG2 VAL A  41      29.320  47.580  66.780  1.00  0.00
ATOM    377  C   VAL A  41      28.820  44.580  66.660  1.00  0.00
ATOM    378  O   VAL A  41      28.700  44.780  65.460  1.00  0.00
ATOM    379  N   THR A  42      29.550  43.620  67.220  1.00  0.00
ATOM    380  H   THR A  42      29.630  43.440  68.200  1.00  0.00
ATOM    381  CA  THR A  42      30.320  42.740  66.330  1.00  0.00
ATOM    382  CB  THR A  42      31.260  41.830  67.130  1.00  0.00
ATOM    383  OG1 THR A  42      30.550  41.190  68.200  1.00  0.00
ATOM    384  HG1 THR A  42      30.700  41.760  69.000  1.00  0.00
ATOM    385  CG2 THR A  42      32.540  42.610  67.450  1.00  0.00
ATOM    386  C   THR A  42      29.550  41.880  65.330  1.00  0.00
ATOM    387  O   THR A  42      29.980  41.710  64.190  1.00  0.00
ATOM    388  N   PHE A  43      28.490  41.240  65.820  1.00  0.00
ATOM    389  H   PHE A  43      28.480  40.920  66.760  1.00  0.00
ATOM    390  CA  PHE A  43      27.390  40.610  65.080  1.00  0.00
ATOM    391  CB  PHE A  43      26.430  39.740  65.910  1.00  0.00
ATOM    392  CG  PHE A  43      26.970  38.340  66.220  1.00  0.00
ATOM    393  CD1 PHE A  43      27.050  38.110  67.590  1.00  0.00
ATOM    394  HD1 PHE A  43      27.080  38.880  68.350  1.00  0.00
ATOM    395  CD2 PHE A  43      26.940  37.350  65.250  1.00  0.00
ATOM    396  HD2 PHE A  43      26.390  37.540  64.330  1.00  0.00
ATOM    397  CE1 PHE A  43      27.100  36.790  68.040  1.00  0.00
ATOM    398  HE1 PHE A  43      27.120  36.540  69.100  1.00  0.00
ATOM    399  CE2 PHE A  43      27.020  36.030  65.690  1.00  0.00
ATOM    400  HE2 PHE A  43      27.030  35.290  64.900  1.00  0.00
ATOM    401  CZ  PHE A  43      27.050  35.810  67.060  1.00  0.00
ATOM    402  HZ  PHE A  43      27.240  34.800  67.440  1.00  0.00
ATOM    403  C   PHE A  43      26.590  41.480  64.110  1.00  0.00
ATOM    404  O   PHE A  43      26.070  41.060  63.080  1.00  0.00
ATOM    405  N   PHE A  44      26.320  42.660  64.660  1.00  0.00
ATOM    406  H   PHE A  44      26.300  42.820  65.640  1.00  0.00
ATOM    407  CA  PHE A  44      25.580  43.720  63.950  1.00  0.00
ATOM    408  CB  PHE A  44      25.340  45.020  64.720  1.00  0.00
ATOM    409  CG  PHE A  44      24.080  45.240  65.550  1.00  0.00
ATOM    410  CD1 PHE A  44      23.430  44.150  66.120  1.00  0.00
ATOM    411  HD1 PHE A  44      23.860  43.150  66.090  1.00  0.00
ATOM    412  CD2 PHE A  44      23.890  46.540  66.000  1.00  0.00
ATOM    413  HD2 PHE A  44      24.500  47.360  65.610  1.00  0.00
ATOM    414  CE1 PHE A  44      22.590  44.380  67.200  1.00  0.00
ATOM    415  HE1 PHE A  44      21.890  43.600  67.510  1.00  0.00
ATOM    416  CE2 PHE A  44      23.000  46.760  67.040  1.00  0.00
ATOM    417  HE2 PHE A  44      22.930  47.760  67.490  1.00  0.00
ATOM    418  CZ  PHE A  44      22.380  45.680  67.650  1.00  0.00
ATOM    419  HZ  PHE A  44      21.720  45.860  68.490  1.00  0.00
ATOM    420  C   PHE A  44      26.400  44.280  62.790  1.00  0.00
ATOM    421  O   PHE A  44      25.760  44.640  61.800  1.00  0.00
ATOM    422  N   LEU A  45      27.720  44.430  62.890  1.00  0.00
ATOM    423  H   LEU A  45      28.130  44.290  63.790  1.00  0.00
ATOM    424  CA  LEU A  45      28.580  44.610  61.710  1.00  0.00
ATOM    425  CB  LEU A  45      30.010  45.020  62.070  1.00  0.00
ATOM    426  CG  LEU A  45      29.950  46.440  62.630  1.00  0.00
ATOM    427  CD1 LEU A  45      31.040  46.800  63.650  1.00  0.00
ATOM    428  CD2 LEU A  45      29.920  47.480  61.510  1.00  0.00
ATOM    429  C   LEU A  45      28.680  43.350  60.850  1.00  0.00
ATOM    430  O   LEU A  45      28.570  43.470  59.630  1.00  0.00
ATOM    431  N   PHE A  46      28.810  42.180  61.470  1.00  0.00
ATOM    432  H   PHE A  46      29.190  42.230  62.390  1.00  0.00
ATOM    433  CA  PHE A  46      28.910  40.870  60.810  1.00  0.00
ATOM    434  CB  PHE A  46      28.810  39.880  61.970  1.00  0.00
ATOM    435  CG  PHE A  46      29.250  38.480  61.530  1.00  0.00
ATOM    436  CD1 PHE A  46      28.230  37.550  61.390  1.00  0.00
ATOM    437  HD1 PHE A  46      27.320  38.020  61.010  1.00  0.00
ATOM    438  CD2 PHE A  46      30.600  38.160  61.640  1.00  0.00
ATOM    439  HD2 PHE A  46      31.420  38.820  61.390  1.00  0.00
ATOM    440  CE1 PHE A  46      28.580  36.220  61.530  1.00  0.00
ATOM    441  HE1 PHE A  46      27.930  35.340  61.480  1.00  0.00
ATOM    442  CE2 PHE A  46      30.920  36.810  61.820  1.00  0.00
ATOM    443  HE2 PHE A  46      31.910  36.570  62.190  1.00  0.00
ATOM    444  CZ  PHE A  46      29.910  35.860  61.780  1.00  0.00
ATOM    445  HZ  PHE A  46      30.150  34.850  62.100  1.00  0.00
ATOM    446  C   PHE A  46      27.770  40.710  59.800  1.00  0.00
ATOM    447  O   PHE A  46      28.080  40.420  58.650  1.00  0.00
ATOM    448  N   LEU A  47      26.480  40.840  60.130  1.00  0.00
ATOM    449  H   LEU A  47      26.350  41.070  61.090  1.00  0.00
ATOM    450  CA  LEU A  47      25.320  41.070  59.260  1.00  0.00
ATOM    451  CB  LEU A  47      24.240  41.730  60.120  1.00  0.00
ATOM    452  CG  LEU A  47      23.450  40.680  60.920  1.00  0.00
ATOM    453  CD1 LEU A  47      22.590  41.310  62.010  1.00  0.00
ATOM    454  CD2 LEU A  47      22.500  39.940  59.970  1.00  0.00
ATOM    455  C   LEU A  47      25.500  41.790  57.930  1.00  0.00
ATOM    456  O   LEU A  47      24.910  41.540  56.880  1.00  0.00
ATOM    457  N   LEU A  48      26.400  42.760  58.020  1.00  0.00
ATOM    458  H   LEU A  48      27.030  42.980  58.770  1.00  0.00
ATOM    459  CA  LEU A  48      26.710  43.630  56.870  1.00  0.00
ATOM    460  CB  LEU A  48      26.940  45.050  57.380  1.00  0.00
ATOM    461  CG  LEU A  48      26.230  46.060  56.480  1.00  0.00
ATOM    462  CD1 LEU A  48      24.730  46.150  56.770  1.00  0.00
ATOM    463  CD2 LEU A  48      26.970  47.400  56.540  1.00  0.00
ATOM    464  C   LEU A  48      27.820  43.160  55.930  1.00  0.00
ATOM    465  O   LEU A  48      27.780  43.230  54.700  1.00  0.00
ATOM    466  N   SER A  49      28.730  42.360  56.480  1.00  0.00
ATOM    467  H   SER A  49      28.790  42.330  57.470  1.00  0.00
ATOM    468  CA  SER A  49      29.950  41.850  55.840  1.00  0.00
ATOM    469  CB  SER A  49      31.160  42.300  56.670  1.00  0.00
ATOM    470  OG  SER A  49      31.030  41.720  57.980  1.00  0.00
ATOM    471  HG  SER A  49      31.940  41.850  58.380  1.00  0.00
ATOM    472  C   SER A  49      30.060  40.380  55.430  1.00  0.00
ATOM    473  O   SER A  49      30.120  40.100  54.230  1.00  0.00
ATOM    474  N   ALA A  50      29.750  39.540  56.410  1.00  0.00
ATOM    475  H   ALA A  50      29.630  39.950  57.320  1.00  0.00
ATOM    476  CA  ALA A  50      29.580  38.080  56.450  1.00  0.00
ATOM    477  CB  ALA A  50      29.140  37.800  57.880  1.00  0.00
ATOM    478  C   ALA A  50      28.510  37.590  55.480  1.00  0.00
ATOM    479  O   ALA A  50      28.770  36.660  54.710  1.00  0.00
ATOM    480  N   THR A  51      27.430  38.360  55.330  1.00  0.00
ATOM    481  H   THR A  51      27.260  39.140  55.920  1.00  0.00
ATOM    482  CA  THR A  51      26.340  38.060  54.390  1.00  0.00
ATOM    483  CB  THR A  51      25.100  38.900  54.640  1.00  0.00
ATOM    484  OG1 THR A  51      25.470  40.280  54.670  1.00  0.00
ATOM    485  HG1 THR A  51      25.040  40.690  55.470  1.00  0.00
ATOM    486  CG2 THR A  51      24.200  38.550  55.840  1.00  0.00
ATOM    487  C   THR A  51      26.800  38.010  52.930  1.00  0.00
ATOM    488  O   THR A  51      26.970  36.980  52.280  1.00  0.00
ATOM    489  N   PHE A  52      27.170  39.240  52.580  1.00  0.00
ATOM    490  H   PHE A  52      26.740  40.060  52.960  1.00  0.00
ATOM    491  CA  PHE A  52      27.880  39.620  51.350  1.00  0.00
ATOM    492  CB  PHE A  52      28.190  41.110  51.490  1.00  0.00
ATOM    493  CG  PHE A  52      27.720  41.960  50.310  1.00  0.00
ATOM    494  CD1 PHE A  52      26.460  42.530  50.430  1.00  0.00
ATOM    495  HD1 PHE A  52      25.830  42.230  51.270  1.00  0.00
ATOM    496  CD2 PHE A  52      28.570  42.290  49.260  1.00  0.00
ATOM    497  HD2 PHE A  52      29.600  41.940  49.220  1.00  0.00
ATOM    498  CE1 PHE A  52      25.980  43.420  49.480  1.00  0.00
ATOM    499  HE1 PHE A  52      25.170  44.070  49.820  1.00  0.00
ATOM    500  CE2 PHE A  52      28.140  43.240  48.340  1.00  0.00
ATOM    501  HE2 PHE A  52      28.970  43.730  47.830  1.00  0.00
ATOM    502  CZ  PHE A  52      26.890  43.820  48.510  1.00  0.00
ATOM    503  HZ  PHE A  52      26.430  44.560  47.850  1.00  0.00
ATOM    504  C   PHE A  52      29.130  38.820  51.010  1.00  0.00
ATOM    505  O   PHE A  52      29.530  38.940  49.850  1.00  0.00
ATOM    506  N   ASN A  53      29.920  38.450  52.010  1.00  0.00
ATOM    507  H   ASN A  53      29.800  38.680  52.980  1.00  0.00
ATOM    508  CA  ASN A  53      30.820  37.310  51.780  1.00  0.00
ATOM    509  CB  ASN A  53      31.720  37.290  53.020  1.00  0.00
ATOM    510  CG  ASN A  53      33.130  36.750  52.760  1.00  0.00
ATOM    511  OD1 ASN A  53      33.430  35.970  51.850  1.00  0.00
ATOM    512  ND2 ASN A  53      34.080  36.950  53.670  1.00  0.00
ATOM    513 HD21 ASN A  53      33.900  37.400  54.540  1.00  0.00
ATOM    514 HD22 ASN A  53      35.030  36.730  53.470  1.00  0.00
ATOM    515  C   ASN A  53      30.250  35.980  51.280  1.00  0.00
ATOM    516  O   ASN A  53      30.240  35.720  50.080  1.00  0.00
ATOM    517  N   ALA A  54      29.490  35.360  52.180  1.00  0.00
ATOM    518  H   ALA A  54      29.180  35.870  52.990  1.00  0.00
ATOM    519  CA  ALA A  54      28.780  34.100  51.940  1.00  0.00
ATOM    520  CB  ALA A  54      27.890  33.860  53.160  1.00  0.00
ATOM    521  C   ALA A  54      27.720  33.950  50.850  1.00  0.00
ATOM    522  O   ALA A  54      27.890  33.040  50.040  1.00  0.00
ATOM    523  N   SER A  55      26.780  34.860  50.630  1.00  0.00
ATOM    524  H   SER A  55      26.820  35.740  51.090  1.00  0.00
ATOM    525  CA  SER A  55      25.850  34.820  49.480  1.00  0.00
ATOM    526  CB  SER A  55      25.030  36.110  49.390  1.00  0.00
ATOM    527  OG  SER A  55      25.780  37.320  49.580  1.00  0.00
ATOM    528  HG  SER A  55      25.600  37.890  48.770  1.00  0.00
ATOM    529  C   SER A  55      26.550  34.820  48.120  1.00  0.00
ATOM    530  O   SER A  55      26.250  34.030  47.230  1.00  0.00
ATOM    531  N   PHE A  56      27.490  35.760  47.980  1.00  0.00
ATOM    532  H   PHE A  56      27.450  36.540  48.600  1.00  0.00
ATOM    533  CA  PHE A  56      28.420  35.890  46.850  1.00  0.00
ATOM    534  CB  PHE A  56      29.230  37.190  46.970  1.00  0.00
ATOM    535  CG  PHE A  56      28.480  38.470  46.600  1.00  0.00
ATOM    536  CD1 PHE A  56      27.670  39.050  47.570  1.00  0.00
ATOM    537  HD1 PHE A  56      27.530  38.520  48.510  1.00  0.00
ATOM    538  CD2 PHE A  56      28.710  39.040  45.350  1.00  0.00
ATOM    539  HD2 PHE A  56      29.650  38.820  44.840  1.00  0.00
ATOM    540  CE1 PHE A  56      26.920  40.180  47.280  1.00  0.00
ATOM    541  HE1 PHE A  56      26.760  40.880  48.100  1.00  0.00
ATOM    542  CE2 PHE A  56      27.950  40.170  45.080  1.00  0.00
ATOM    543  HE2 PHE A  56      28.260  40.890  44.320  1.00  0.00
ATOM    544  CZ  PHE A  56      27.090  40.740  46.010  1.00  0.00
ATOM    545  HZ  PHE A  56      26.560  41.640  45.730  1.00  0.00
ATOM    546  C   PHE A  56      29.430  34.770  46.600  1.00  0.00
ATOM    547  O   PHE A  56      29.790  34.560  45.440  1.00  0.00
ATOM    548  N   LEU A  57      29.960  34.170  47.660  1.00  0.00
ATOM    549  H   LEU A  57      29.860  34.640  48.540  1.00  0.00
ATOM    550  CA  LEU A  57      30.680  32.900  47.490  1.00  0.00
ATOM    551  CB  LEU A  57      31.350  32.390  48.760  1.00  0.00
ATOM    552  CG  LEU A  57      32.440  33.240  49.420  1.00  0.00
ATOM    553  CD1 LEU A  57      32.830  32.620  50.760  1.00  0.00
ATOM    554  CD2 LEU A  57      33.710  33.300  48.580  1.00  0.00
ATOM    555  C   LEU A  57      29.830  31.770  46.920  1.00  0.00
ATOM    556  O   LEU A  57      30.050  31.220  45.850  1.00  0.00
ATOM    557  N   LEU A  58      28.680  31.540  47.570  1.00  0.00
ATOM    558  H   LEU A  58      28.260  32.170  48.210  1.00  0.00
ATOM    559  CA  LEU A  58      27.880  30.350  47.250  1.00  0.00
ATOM    560  CB  LEU A  58      27.510  29.660  48.560  1.00  0.00
ATOM    561  CG  LEU A  58      28.550  28.710  49.150  1.00  0.00
ATOM    562  CD1 LEU A  58      28.010  27.810  50.270  1.00  0.00
ATOM    563  CD2 LEU A  58      29.260  27.750  48.200  1.00  0.00
ATOM    564  C   LEU A  58      26.680  30.810  46.420  1.00  0.00
ATOM    565  O   LEU A  58      25.560  30.820  46.920  1.00  0.00
ATOM    566  N   LYS A  59      26.940  30.940  45.120  1.00  0.00
ATOM    567  H   LYS A  59      27.810  30.640  44.740  1.00  0.00
ATOM    568  CA  LYS A  59      25.990  31.340  44.070  1.00  0.00
ATOM    569  CB  LYS A  59      26.690  32.140  42.970  1.00  0.00
ATOM    570  CG  LYS A  59      27.190  33.480  43.520  1.00  0.00
ATOM    571  CD  LYS A  59      27.510  34.420  42.350  1.00  0.00
ATOM    572  CE  LYS A  59      27.330  35.850  42.880  1.00  0.00
ATOM    573  NZ  LYS A  59      27.560  36.820  41.800  1.00  0.00
ATOM    574  HZ1 LYS A  59      27.250  37.730  42.080  1.00  0.00
ATOM    575  HZ2 LYS A  59      28.510  36.870  41.490  1.00  0.00
ATOM    576  HZ3 LYS A  59      26.990  36.560  41.010  1.00  0.00
ATOM    577  C   LYS A  59      24.990  30.320  43.530  1.00  0.00
ATOM    578  O   LYS A  59      25.040  29.930  42.360  1.00  0.00
ATOM    579  N   LEU A  60      24.080  29.860  44.390  1.00  0.00
ATOM    580  H   LEU A  60      24.070  30.240  45.310  1.00  0.00
ATOM    581  CA  LEU A  60      23.190  28.720  44.150  1.00  0.00
ATOM    582  CB  LEU A  60      23.440  27.670  45.230  1.00  0.00
ATOM    583  CG  LEU A  60      22.450  26.510  45.170  1.00  0.00
ATOM    584  CD1 LEU A  60      23.040  25.150  45.550  1.00  0.00
ATOM    585  CD2 LEU A  60      21.550  26.820  46.370  1.00  0.00
ATOM    586  C   LEU A  60      21.780  29.260  43.850  1.00  0.00
ATOM    587  O   LEU A  60      21.230  29.890  44.740  1.00  0.00
ATOM    588  N   GLN A  61      21.500  29.310  42.550  1.00  0.00
ATOM    589  H   GLN A  61      22.260  29.270  41.900  1.00  0.00
ATOM    590  CA  GLN A  61      20.180  29.740  42.060  1.00  0.00
ATOM    591  CB  GLN A  61      20.510  30.720  40.930  1.00  0.00
ATOM    592  CG  GLN A  61      20.980  32.010  41.610  1.00  0.00
ATOM    593  CD  GLN A  61      21.310  33.040  40.520  1.00  0.00
ATOM    594  OE1 GLN A  61      22.350  32.970  39.870  1.00  0.00
ATOM    595  NE2 GLN A  61      20.460  34.030  40.250  1.00  0.00
ATOM    596 HE21 GLN A  61      19.720  34.130  40.920  1.00  0.00
ATOM    597 HE22 GLN A  61      20.800  34.720  39.610  1.00  0.00
ATOM    598  C   GLN A  61      19.330  28.570  41.580  1.00  0.00
ATOM    599  O   GLN A  61      19.880  27.590  41.080  1.00  0.00
ATOM    600  N   LYS A  62      18.050  28.550  41.960  1.00  0.00
ATOM    601  H   LYS A  62      17.640  29.140  42.640  1.00  0.00
ATOM    602  CA  LYS A  62      17.160  27.440  41.580  1.00  0.00
ATOM    603  CB  LYS A  62      17.030  26.530  42.800  1.00  0.00
ATOM    604  CG  LYS A  62      18.090  25.470  43.120  1.00  0.00
ATOM    605  CD  LYS A  62      17.870  24.220  42.270  1.00  0.00
ATOM    606  CE  LYS A  62      18.780  23.050  42.650  1.00  0.00
ATOM    607  NZ  LYS A  62      18.390  21.890  41.830  1.00  0.00
ATOM    608  HZ1 LYS A  62      17.400  21.830  41.770  1.00  0.00
ATOM    609  HZ2 LYS A  62      18.860  21.980  40.950  1.00  0.00
ATOM    610  HZ3 LYS A  62      18.680  21.010  42.220  1.00  0.00
ATOM    611  C   LYS A  62      15.920  27.740  40.730  1.00  0.00
ATOM    612  O   LYS A  62      15.030  26.890  40.730  1.00  0.00
ATOM    613  N   TRP A  63      15.960  28.840  39.990  1.00  0.00
ATOM    614  H   TRP A  63      16.730  29.460  39.820  1.00  0.00
ATOM    615  CA  TRP A  63      14.770  29.220  39.210  1.00  0.00
ATOM    616  CB  TRP A  63      14.670  30.730  39.010  1.00  0.00
ATOM    617  CG  TRP A  63      15.010  31.320  40.380  1.00  0.00
ATOM    618  CD1 TRP A  63      16.140  31.940  40.690  1.00  0.00
ATOM    619  HD1 TRP A  63      16.990  31.900  40.000  1.00  0.00
ATOM    620  CD2 TRP A  63      14.090  31.690  41.360  1.00  0.00
ATOM    621  NE1 TRP A  63      15.990  32.770  41.720  1.00  0.00
ATOM    622  HE1 TRP A  63      16.610  33.530  41.890  1.00  0.00
ATOM    623  CE2 TRP A  63      14.780  32.540  42.220  1.00  0.00
ATOM    624  CE3 TRP A  63      12.720  31.560  41.580  1.00  0.00
ATOM    625  HE3 TRP A  63      12.050  30.960  40.970  1.00  0.00
ATOM    626  CZ2 TRP A  63      14.170  33.260  43.240  1.00  0.00
ATOM    627  HZ2 TRP A  63      14.770  33.720  44.020  1.00  0.00
ATOM    628  CZ3 TRP A  63      12.110  32.270  42.610  1.00  0.00
ATOM    629  HZ3 TRP A  63      11.040  32.270  42.760  1.00  0.00
ATOM    630  CH2 TRP A  63      12.800  33.110  43.480  1.00  0.00
ATOM    631  HH2 TRP A  63      12.370  33.410  44.430  1.00  0.00
ATOM    632  C   TRP A  63      14.440  28.420  37.950  1.00  0.00
ATOM    633  O   TRP A  63      15.320  27.750  37.410  1.00  0.00
ATOM    634  N   THR A  64      13.190  28.450  37.510  1.00  0.00
ATOM    635  H   THR A  64      12.400  28.820  38.000  1.00  0.00
ATOM    636  CA  THR A  64      12.820  27.720  36.280  1.00  0.00
ATOM    637  CB  THR A  64      11.940  26.510  36.620  1.00  0.00
ATOM    638  OG1 THR A  64      10.850  26.890  37.470  1.00  0.00
ATOM    639  HG1 THR A  64      10.020  26.390  37.210  1.00  0.00
ATOM    640  CG2 THR A  64      12.690  25.430  37.390  1.00  0.00
ATOM    641  C   THR A  64      12.260  28.530  35.100  1.00  0.00
ATOM    642  O   THR A  64      11.930  27.980  34.050  1.00  0.00
ATOM    643  N   GLN A  65      11.840  29.720  35.500  1.00  0.00
ATOM    644  H   GLN A  65      11.590  29.820  36.460  1.00  0.00
ATOM    645  CA  GLN A  65      11.330  30.800  34.630  1.00  0.00
ATOM    646  CB  GLN A  65      10.130  31.530  35.240  1.00  0.00
ATOM    647  CG  GLN A  65       8.790  30.800  35.130  1.00  0.00
ATOM    648  CD  GLN A  65       8.780  29.490  35.920  1.00  0.00
ATOM    649  OE1 GLN A  65       8.840  29.480  37.140  1.00  0.00
ATOM    650  NE2 GLN A  65       8.930  28.320  35.290  1.00  0.00
ATOM    651 HE21 GLN A  65       9.140  28.320  34.320  1.00  0.00
ATOM    652 HE22 GLN A  65       8.740  27.470  35.770  1.00  0.00
ATOM    653  C   GLN A  65      12.430  31.750  34.140  1.00  0.00
ATOM    654  O   GLN A  65      12.890  32.590  34.910  1.00  0.00
ATOM    655  N   LYS A  66      12.830  31.700  32.870  1.00  0.00
ATOM    656  H   LYS A  66      13.600  32.240  32.540  1.00  0.00
ATOM    657  CA  LYS A  66      12.250  30.940  31.760  1.00  0.00
ATOM    658  CB  LYS A  66      11.690  31.760  30.590  1.00  0.00
ATOM    659  CG  LYS A  66      10.710  32.810  31.110  1.00  0.00
ATOM    660  CD  LYS A  66      10.000  33.560  29.980  1.00  0.00
ATOM    661  CE  LYS A  66       8.990  32.610  29.340  1.00  0.00
ATOM    662  NZ  LYS A  66       8.390  33.170  28.120  1.00  0.00
ATOM    663  HZ1 LYS A  66       9.080  33.140  27.400  1.00  0.00
ATOM    664  HZ2 LYS A  66       8.150  34.140  28.230  1.00  0.00
ATOM    665  HZ3 LYS A  66       7.680  32.540  27.810  1.00  0.00
ATOM    666  C   LYS A  66      13.220  29.960  31.100  1.00  0.00
ATOM    667  O   LYS A  66      12.950  28.770  30.940  1.00  0.00
ATOM    668  N   LYS A  67      14.320  30.540  30.630  1.00  0.00
ATOM    669  H   LYS A  67      14.600  31.480  30.820  1.00  0.00
ATOM    670  CA  LYS A  67      15.400  29.700  30.080  1.00  0.00
ATOM    671  CB  LYS A  67      15.430  29.570  28.550  1.00  0.00
ATOM    672  CG  LYS A  67      16.440  28.520  28.080  1.00  0.00
ATOM    673  CD  LYS A  67      17.710  29.270  27.660  1.00  0.00
ATOM    674  CE  LYS A  67      18.800  28.270  27.280  1.00  0.00
ATOM    675  NZ  LYS A  67      20.110  28.860  27.600  1.00  0.00
ATOM    676  HZ1 LYS A  67      20.190  29.820  27.320  1.00  0.00
ATOM    677  HZ2 LYS A  67      20.820  28.380  27.080  1.00  0.00
ATOM    678  HZ3 LYS A  67      20.380  28.850  28.560  1.00  0.00
ATOM    679  C   LYS A  67      16.740  30.100  30.690  1.00  0.00
ATOM    680  O   LYS A  67      17.510  29.290  31.220  1.00  0.00
ATOM    681  N   GLU A  68      17.100  31.370  30.520  1.00  0.00
ATOM    682  H   GLU A  68      16.630  31.950  29.860  1.00  0.00
ATOM    683  CA  GLU A  68      18.230  32.150  31.040  1.00  0.00
ATOM    684  CB  GLU A  68      17.990  33.600  30.610  1.00  0.00
ATOM    685  CG  GLU A  68      16.900  34.430  31.280  1.00  0.00
ATOM    686  CD  GLU A  68      15.560  33.790  30.910  1.00  0.00
ATOM    687  OE1 GLU A  68      14.960  33.160  31.810  1.00  0.00
ATOM    688  OE2 GLU A  68      15.120  33.770  29.740  1.00  0.00
ATOM    689  C   GLU A  68      18.490  32.000  32.540  1.00  0.00
ATOM    690  O   GLU A  68      19.620  32.140  33.000  1.00  0.00
ATOM    691  N   LYS A  69      17.400  31.960  33.310  1.00  0.00
ATOM    692  H   LYS A  69      16.510  32.240  32.950  1.00  0.00
ATOM    693  CA  LYS A  69      17.350  31.730  34.760  1.00  0.00
ATOM    694  CB  LYS A  69      16.770  33.040  35.300  1.00  0.00
ATOM    695  CG  LYS A  69      17.260  33.350  36.720  1.00  0.00
ATOM    696  CD  LYS A  69      16.680  34.660  37.260  1.00  0.00
ATOM    697  CE  LYS A  69      15.230  34.330  37.600  1.00  0.00
ATOM    698  NZ  LYS A  69      14.400  35.540  37.670  1.00  0.00
ATOM    699  HZ1 LYS A  69      14.460  36.060  36.810  1.00  0.00
ATOM    700  HZ2 LYS A  69      13.500  35.190  37.900  1.00  0.00
ATOM    701  HZ3 LYS A  69      14.740  36.080  38.440  1.00  0.00
ATOM    702  C   LYS A  69      16.560  30.460  35.050  1.00  0.00
ATOM    703  O   LYS A  69      15.430  30.320  34.570  1.00  0.00
ATOM    704  N   GLY A  70      17.150  29.440  35.680  1.00  0.00
ATOM    705  H   GLY A  70      16.620  28.650  35.980  1.00  0.00
ATOM    706  CA  GLY A  70      18.490  29.480  36.280  1.00  0.00
ATOM    707  C   GLY A  70      18.640  28.650  37.560  1.00  0.00
ATOM    708  O   GLY A  70      18.530  29.160  38.670  1.00  0.00
ATOM    709  N   LYS A  71      18.730  27.370  37.230  1.00  0.00
ATOM    710  H   LYS A  71      18.220  27.050  36.440  1.00  0.00
ATOM    711  CA  LYS A  71      19.250  26.320  38.120  1.00  0.00
ATOM    712  CB  LYS A  71      18.620  24.930  38.010  1.00  0.00
ATOM    713  CG  LYS A  71      17.110  24.770  38.230  1.00  0.00
ATOM    714  CD  LYS A  71      16.710  23.330  37.910  1.00  0.00
ATOM    715  CE  LYS A  71      15.230  23.030  38.130  1.00  0.00
ATOM    716  NZ  LYS A  71      15.130  21.570  38.190  1.00  0.00
ATOM    717  HZ1 LYS A  71      14.240  21.170  38.400  1.00  0.00
ATOM    718  HZ2 LYS A  71      15.680  21.240  38.960  1.00  0.00
ATOM    719  HZ3 LYS A  71      15.440  21.150  37.340  1.00  0.00
ATOM    720  C   LYS A  71      20.760  26.310  37.850  1.00  0.00
ATOM    721  O   LYS A  71      21.180  25.420  37.110  1.00  0.00
ATOM    722  N   LYS A  72      21.460  27.070  38.680  1.00  0.00
ATOM    723  H   LYS A  72      20.970  27.580  39.390  1.00  0.00
ATOM    724  CA  LYS A  72      22.890  27.420  38.580  1.00  0.00
ATOM    725  CB  LYS A  72      23.240  28.680  39.380  1.00  0.00
ATOM    726  CG  LYS A  72      24.500  29.450  38.980  1.00  0.00
ATOM    727  CD  LYS A  72      24.470  30.940  39.350  1.00  0.00
ATOM    728  CE  LYS A  72      25.850  31.610  39.250  1.00  0.00
ATOM    729  NZ  LYS A  72      26.520  31.550  37.940  1.00  0.00
ATOM    730  HZ1 LYS A  72      26.890  30.650  37.750  1.00  0.00
ATOM    731  HZ2 LYS A  72      27.340  32.120  38.000  1.00  0.00
ATOM    732  HZ3 LYS A  72      25.990  31.830  37.140  1.00  0.00
ATOM    733  C   LYS A  72      23.840  26.280  38.960  1.00  0.00
ATOM    734  O   LYS A  72      23.750  25.740  40.060  1.00  0.00
ATOM    735  N   LEU A  73      24.880  26.030  38.180  1.00  0.00
ATOM    736  H   LEU A  73      24.940  26.450  37.280  1.00  0.00
ATOM    737  CA  LEU A  73      25.900  25.000  38.440  1.00  0.00
ATOM    738  CB  LEU A  73      26.460  24.490  37.110  1.00  0.00
ATOM    739  CG  LEU A  73      25.440  23.990  36.090  1.00  0.00
ATOM    740  CD1 LEU A  73      26.110  23.410  34.850  1.00  0.00
ATOM    741  CD2 LEU A  73      24.510  22.960  36.740  1.00  0.00
ATOM    742  C   LEU A  73      27.000  25.530  39.370  1.00  0.00
ATOM    743  O   LEU A  73      27.720  26.470  39.040  1.00  0.00
ATOM    744  N   SER A  74      27.000  24.910  40.540  1.00  0.00
ATOM    745  H   SER A  74      26.410  24.140  40.780  1.00  0.00
ATOM    746  CA  SER A  74      27.890  25.440  41.590  1.00  0.00
ATOM    747  CB  SER A  74      27.280  25.540  42.990  1.00  0.00
ATOM    748  OG  SER A  74      28.150  26.370  43.760  1.00  0.00
ATOM    749  HG  SER A  74      28.450  25.800  44.530  1.00  0.00
ATOM    750  C   SER A  74      29.200  24.650  41.660  1.00  0.00
ATOM    751  O   SER A  74      29.230  23.630  42.350  1.00  0.00
ATOM    752  N   ARG A  75      30.170  25.070  40.860  1.00  0.00
ATOM    753  H   ARG A  75      30.050  25.870  40.260  1.00  0.00
ATOM    754  CA  ARG A  75      31.360  24.260  40.590  1.00  0.00
ATOM    755  CB  ARG A  75      31.180  23.510  39.270  1.00  0.00
ATOM    756  CG  ARG A  75      30.220  22.330  39.450  1.00  0.00
ATOM    757  CD  ARG A  75      29.560  21.970  38.120  1.00  0.00
ATOM    758  NE  ARG A  75      28.710  20.790  38.350  1.00  0.00
ATOM    759  HE  ARG A  75      28.250  20.820  39.240  1.00  0.00
ATOM    760  CZ  ARG A  75      28.130  19.940  37.490  1.00  0.00
ATOM    761  NH1 ARG A  75      28.180  20.210  36.170  1.00  0.00
ATOM    762 HH11 ARG A  75      27.800  19.610  35.470  1.00  0.00
ATOM    763 HH12 ARG A  75      28.520  21.090  35.850  1.00  0.00
ATOM    764  NH2 ARG A  75      27.590  18.820  37.990  1.00  0.00
ATOM    765 HH21 ARG A  75      27.720  18.600  38.950  1.00  0.00
ATOM    766 HH22 ARG A  75      27.010  18.310  37.360  1.00  0.00
ATOM    767  C   ARG A  75      32.750  24.900  40.600  1.00  0.00
ATOM    768  O   ARG A  75      33.700  24.230  40.980  1.00  0.00
ATOM    769  N   MET A  76      32.840  26.220  40.420  1.00  0.00
ATOM    770  H   MET A  76      32.100  26.810  40.100  1.00  0.00
ATOM    771  CA  MET A  76      34.140  26.900  40.340  1.00  0.00
ATOM    772  CB  MET A  76      34.260  28.070  39.360  1.00  0.00
ATOM    773  CG  MET A  76      34.470  27.500  37.960  1.00  0.00
ATOM    774  SD  MET A  76      33.020  26.730  37.150  1.00  0.00
ATOM    775  CE  MET A  76      33.840  26.630  35.580  1.00  0.00
ATOM    776  C   MET A  76      34.670  27.420  41.670  1.00  0.00
ATOM    777  O   MET A  76      33.910  27.700  42.600  1.00  0.00
ATOM    778  N   LYS A  77      36.000  27.420  41.730  1.00  0.00
ATOM    779  H   LYS A  77      36.560  27.230  40.920  1.00  0.00
ATOM    780  CA  LYS A  77      36.710  28.070  42.840  1.00  0.00
ATOM    781  CB  LYS A  77      36.490  29.580  42.940  1.00  0.00
ATOM    782  CG  LYS A  77      37.060  30.320  41.730  1.00  0.00
ATOM    783  CD  LYS A  77      36.100  31.400  41.230  1.00  0.00
ATOM    784  CE  LYS A  77      36.490  32.310  40.070  1.00  0.00
ATOM    785  NZ  LYS A  77      35.370  32.730  39.220  1.00  0.00
ATOM    786  HZ1 LYS A  77      35.650  33.390  38.520  1.00  0.00
ATOM    787  HZ2 LYS A  77      34.970  31.950  38.730  1.00  0.00
ATOM    788  HZ3 LYS A  77      34.620  33.060  39.780  1.00  0.00
ATOM    789  C   LYS A  77      36.610  27.460  44.240  1.00  0.00
ATOM    790  O   LYS A  77      36.790  28.210  45.200  1.00  0.00
ATOM    791  N   LEU A  78      36.260  26.190  44.370  1.00  0.00
ATOM    792  H   LEU A  78      36.330  25.530  43.630  1.00  0.00
ATOM    793  CA  LEU A  78      35.980  25.510  45.650  1.00  0.00
ATOM    794  CB  LEU A  78      35.990  24.000  45.440  1.00  0.00
ATOM    795  CG  LEU A  78      34.920  23.510  44.460  1.00  0.00
ATOM    796  CD1 LEU A  78      34.870  22.000  44.720  1.00  0.00
ATOM    797  CD2 LEU A  78      33.550  24.130  44.750  1.00  0.00
ATOM    798  C   LEU A  78      36.860  25.930  46.820  1.00  0.00
ATOM    799  O   LEU A  78      36.370  26.500  47.800  1.00  0.00
ATOM    800  N   LEU A  79      38.160  25.620  46.800  1.00  0.00
ATOM    801  H   LEU A  79      38.510  25.320  45.910  1.00  0.00
ATOM    802  CA  LEU A  79      39.140  25.790  47.880  1.00  0.00
ATOM    803  CB  LEU A  79      40.520  25.530  47.270  1.00  0.00
ATOM    804  CG  LEU A  79      41.600  25.080  48.250  1.00  0.00
ATOM    805  CD1 LEU A  79      41.280  23.730  48.900  1.00  0.00
ATOM    806  CD2 LEU A  79      42.940  24.980  47.530  1.00  0.00
ATOM    807  C   LEU A  79      39.090  27.220  48.430  1.00  0.00
ATOM    808  O   LEU A  79      39.190  27.380  49.650  1.00  0.00
ATOM    809  N   LEU A  80      38.830  28.210  47.580  1.00  0.00
ATOM    810  H   LEU A  80      38.780  27.960  46.610  1.00  0.00
ATOM    811  CA  LEU A  80      38.900  29.610  48.010  1.00  0.00
ATOM    812  CB  LEU A  80      39.010  30.720  46.950  1.00  0.00
ATOM    813  CG  LEU A  80      40.050  30.490  45.850  1.00  0.00
ATOM    814  CD1 LEU A  80      39.770  31.430  44.680  1.00  0.00
ATOM    815  CD2 LEU A  80      41.500  30.510  46.320  1.00  0.00
ATOM    816  C   LEU A  80      37.690  29.960  48.880  1.00  0.00
ATOM    817  O   LEU A  80      37.740  30.640  49.900  1.00  0.00
ATOM    818  N   LYS A  81      36.590  29.290  48.540  1.00  0.00
ATOM    819  H   LYS A  81      36.560  28.800  47.670  1.00  0.00
ATOM    820  CA  LYS A  81      35.280  29.380  49.190  1.00  0.00
ATOM    821  CB  LYS A  81      34.160  28.920  48.250  1.00  0.00
ATOM    822  CG  LYS A  81      34.080  29.690  46.930  1.00  0.00
ATOM    823  CD  LYS A  81      32.960  29.170  46.030  1.00  0.00
ATOM    824  CE  LYS A  81      32.880  30.020  44.760  1.00  0.00
ATOM    825  NZ  LYS A  81      31.650  29.660  44.040  1.00  0.00
ATOM    826  HZ1 LYS A  81      30.850  29.900  44.590  1.00  0.00
ATOM    827  HZ2 LYS A  81      31.620  30.070  43.120  1.00  0.00
ATOM    828  HZ3 LYS A  81      31.600  28.670  43.940  1.00  0.00
ATOM    829  C   LYS A  81      35.170  28.600  50.500  1.00  0.00
ATOM    830  O   LYS A  81      34.730  29.240  51.450  1.00  0.00
ATOM    831  N   HIS A  82      35.620  27.350  50.370  1.00  0.00
ATOM    832  H   HIS A  82      35.870  26.990  49.470  1.00  0.00
ATOM    833  CA  HIS A  82      35.670  26.420  51.500  1.00  0.00
ATOM    834  CB  HIS A  82      36.210  25.030  51.160  1.00  0.00
ATOM    835  CG  HIS A  82      35.600  24.270  49.980  1.00  0.00
ATOM    836  ND1 HIS A  82      36.310  23.540  49.130  1.00  0.00
ATOM    837  CD2 HIS A  82      34.280  24.170  49.910  1.00  0.00
ATOM    838  HD2 HIS A  82      33.800  23.500  50.620  1.00  0.00
ATOM    839  CE1 HIS A  82      35.260  22.870  48.670  1.00  0.00
ATOM    840  HE1 HIS A  82      35.270  21.970  48.060  1.00  0.00
ATOM    841  NE2 HIS A  82      34.200  23.680  48.680  1.00  0.00
ATOM    842  HE2 HIS A  82      33.340  23.670  48.180  1.00  0.00
ATOM    843  C   HIS A  82      36.510  27.050  52.620  1.00  0.00
ATOM    844  O   HIS A  82      36.030  27.180  53.740  1.00  0.00
ATOM    845  N   LEU A  83      37.740  27.520  52.410  1.00  0.00
ATOM    846  H   LEU A  83      38.140  27.300  51.530  1.00  0.00
ATOM    847  CA  LEU A  83      38.590  28.300  53.320  1.00  0.00
ATOM    848  CB  LEU A  83      39.920  28.620  52.640  1.00  0.00
ATOM    849  CG  LEU A  83      40.890  27.470  52.360  1.00  0.00
ATOM    850  CD1 LEU A  83      42.110  27.950  51.570  1.00  0.00
ATOM    851  CD2 LEU A  83      41.320  26.860  53.690  1.00  0.00
ATOM    852  C   LEU A  83      38.110  29.660  53.820  1.00  0.00
ATOM    853  O   LEU A  83      38.200  29.960  55.020  1.00  0.00
ATOM    854  N   THR A  84      37.420  30.470  53.030  1.00  0.00
ATOM    855  H   THR A  84      37.700  30.560  52.070  1.00  0.00
ATOM    856  CA  THR A  84      36.700  31.640  53.570  1.00  0.00
ATOM    857  CB  THR A  84      36.520  32.700  52.480  1.00  0.00
ATOM    858  OG1 THR A  84      37.760  32.780  51.770  1.00  0.00
ATOM    859  HG1 THR A  84      38.310  33.570  52.040  1.00  0.00
ATOM    860  CG2 THR A  84      35.980  34.010  53.050  1.00  0.00
ATOM    861  C   THR A  84      35.440  31.240  54.340  1.00  0.00
ATOM    862  O   THR A  84      35.260  31.860  55.390  1.00  0.00
ATOM    863  N   LEU A  85      34.720  30.170  54.000  1.00  0.00
ATOM    864  H   LEU A  85      34.870  29.770  53.100  1.00  0.00
ATOM    865  CA  LEU A  85      33.650  29.580  54.810  1.00  0.00
ATOM    866  CB  LEU A  85      32.830  28.450  54.180  1.00  0.00
ATOM    867  CG  LEU A  85      31.700  28.910  53.260  1.00  0.00
ATOM    868  CD1 LEU A  85      31.000  27.820  52.460  1.00  0.00
ATOM    869  CD2 LEU A  85      30.730  29.880  53.950  1.00  0.00
ATOM    870  C   LEU A  85      34.110  29.240  56.230  1.00  0.00
ATOM    871  O   LEU A  85      33.380  29.530  57.170  1.00  0.00
ATOM    872  N   ALA A  86      35.280  28.610  56.300  1.00  0.00
ATOM    873  H   ALA A  86      35.690  28.160  55.510  1.00  0.00
ATOM    874  CA  ALA A  86      35.950  28.390  57.600  1.00  0.00
ATOM    875  CB  ALA A  86      37.140  27.460  57.360  1.00  0.00
ATOM    876  C   ALA A  86      36.380  29.630  58.380  1.00  0.00
ATOM    877  O   ALA A  86      36.370  29.630  59.610  1.00  0.00
ATOM    878  N   ASN A  87      36.870  30.660  57.710  1.00  0.00
ATOM    879  H   ASN A  87      37.160  30.520  56.760  1.00  0.00
ATOM    880  CA  ASN A  87      37.300  31.900  58.380  1.00  0.00
ATOM    881  CB  ASN A  87      38.110  32.720  57.380  1.00  0.00
ATOM    882  CG  ASN A  87      38.900  33.820  58.090  1.00  0.00
ATOM    883  OD1 ASN A  87      39.550  33.640  59.120  1.00  0.00
ATOM    884  ND2 ASN A  87      39.080  34.900  57.340  1.00  0.00
ATOM    885 HD21 ASN A  87      38.880  34.900  56.360  1.00  0.00
ATOM    886 HD22 ASN A  87      39.640  35.650  57.710  1.00  0.00
ATOM    887  C   ASN A  87      36.030  32.600  58.890  1.00  0.00
ATOM    888  O   ASN A  87      35.940  32.890  60.080  1.00  0.00
ATOM    889  N   LEU A  88      34.920  32.470  58.170  1.00  0.00
ATOM    890  H   LEU A  88      34.980  32.200  57.210  1.00  0.00
ATOM    891  CA  LEU A  88      33.620  32.980  58.630  1.00  0.00
ATOM    892  CB  LEU A  88      32.500  32.900  57.600  1.00  0.00
ATOM    893  CG  LEU A  88      32.700  33.910  56.460  1.00  0.00
ATOM    894  CD1 LEU A  88      31.640  33.600  55.400  1.00  0.00
ATOM    895  CD2 LEU A  88      32.330  35.300  56.980  1.00  0.00
ATOM    896  C   LEU A  88      33.110  32.130  59.790  1.00  0.00
ATOM    897  O   LEU A  88      32.570  32.700  60.730  1.00  0.00
ATOM    898  N   LEU A  89      33.300  30.810  59.740  1.00  0.00
ATOM    899  H   LEU A  89      33.500  30.410  58.850  1.00  0.00
ATOM    900  CA  LEU A  89      32.790  29.850  60.740  1.00  0.00
ATOM    901  CB  LEU A  89      32.770  28.420  60.210  1.00  0.00
ATOM    902  CG  LEU A  89      31.890  27.630  61.180  1.00  0.00
ATOM    903  CD1 LEU A  89      30.420  28.000  61.340  1.00  0.00
ATOM    904  CD2 LEU A  89      32.070  26.190  60.700  1.00  0.00
ATOM    905  C   LEU A  89      33.340  29.940  62.160  1.00  0.00
ATOM    906  O   LEU A  89      32.540  30.220  63.040  1.00  0.00
ATOM    907  N   GLU A  90      34.650  30.030  62.410  1.00  0.00
ATOM    908  H   GLU A  90      35.350  30.020  61.700  1.00  0.00
ATOM    909  CA  GLU A  90      35.230  29.990  63.760  1.00  0.00
ATOM    910  CB  GLU A  90      36.690  30.460  63.770  1.00  0.00
ATOM    911  CG  GLU A  90      37.270  29.760  65.000  1.00  0.00
ATOM    912  CD  GLU A  90      38.630  30.330  65.410  1.00  0.00
ATOM    913  OE1 GLU A  90      38.800  31.110  66.370  1.00  0.00
ATOM    914  OE2 GLU A  90      39.620  29.880  64.800  1.00  0.00
ATOM    915  C   GLU A  90      34.590  30.990  64.720  1.00  0.00
ATOM    916  O   GLU A  90      34.100  30.520  65.750  1.00  0.00
ATOM    917  N   THR A  91      34.310  32.200  64.240  1.00  0.00
ATOM    918  H   THR A  91      34.370  32.370  63.260  1.00  0.00
ATOM    919  CA  THR A  91      33.660  33.260  65.030  1.00  0.00
ATOM    920  CB  THR A  91      33.380  34.490  64.160  1.00  0.00
ATOM    921  OG1 THR A  91      34.550  34.930  63.460  1.00  0.00
ATOM    922  HG1 THR A  91      35.060  35.510  64.090  1.00  0.00
ATOM    923  CG2 THR A  91      32.810  35.570  65.070  1.00  0.00
ATOM    924  C   THR A  91      32.420  32.790  65.790  1.00  0.00
ATOM    925  O   THR A  91      32.450  32.560  67.000  1.00  0.00
ATOM    926  N   LEU A  92      31.570  32.170  64.980  1.00  0.00
ATOM    927  H   LEU A  92      31.540  32.480  64.030  1.00  0.00
ATOM    928  CA  LEU A  92      30.270  31.560  65.320  1.00  0.00
ATOM    929  CB  LEU A  92      29.510  31.130  64.060  1.00  0.00
ATOM    930  CG  LEU A  92      29.010  32.340  63.270  1.00  0.00
ATOM    931  CD1 LEU A  92      29.180  32.050  61.780  1.00  0.00
ATOM    932  CD2 LEU A  92      27.590  32.820  63.600  1.00  0.00
ATOM    933  C   LEU A  92      30.320  30.430  66.340  1.00  0.00
ATOM    934  O   LEU A  92      29.650  30.390  67.370  1.00  0.00
ATOM    935  N   ILE A  93      31.280  29.530  66.100  1.00  0.00
ATOM    936  H   ILE A  93      32.060  29.860  65.560  1.00  0.00
ATOM    937  CA  ILE A  93      31.470  28.420  67.040  1.00  0.00
ATOM    938  CB  ILE A  93      32.490  27.450  66.450  1.00  0.00
ATOM    939  CG1 ILE A  93      32.220  27.020  65.010  1.00  0.00
ATOM    940  CG2 ILE A  93      32.710  26.140  67.220  1.00  0.00
ATOM    941  CD  ILE A  93      30.980  26.170  64.720  1.00  0.00
ATOM    942  C   ILE A  93      31.770  28.810  68.480  1.00  0.00
ATOM    943  O   ILE A  93      31.260  28.330  69.490  1.00  0.00
ATOM    944  N   VAL A  94      32.760  29.700  68.520  1.00  0.00
ATOM    945  H   VAL A  94      33.240  29.990  67.690  1.00  0.00
ATOM    946  CA  VAL A  94      33.330  30.150  69.800  1.00  0.00
ATOM    947  CB  VAL A  94      34.810  30.420  69.500  1.00  0.00
ATOM    948  CG1 VAL A  94      35.480  29.210  68.830  1.00  0.00
ATOM    949  CG2 VAL A  94      35.040  31.710  68.710  1.00  0.00
ATOM    950  C   VAL A  94      32.440  31.170  70.500  1.00  0.00
ATOM    951  O   VAL A  94      32.250  30.990  71.700  1.00  0.00
ATOM    952  N   MET A  95      31.560  31.820  69.740  1.00  0.00
ATOM    953  H   MET A  95      31.360  31.590  68.780  1.00  0.00
ATOM    954  CA  MET A  95      30.810  32.940  70.300  1.00  0.00
ATOM    955  CB  MET A  95      29.960  33.670  69.260  1.00  0.00
ATOM    956  CG  MET A  95      30.610  34.910  68.630  1.00  0.00
ATOM    957  SD  MET A  95      31.290  36.180  69.760  1.00  0.00
ATOM    958  CE  MET A  95      29.740  36.850  70.330  1.00  0.00
ATOM    959  C   MET A  95      29.860  32.740  71.480  1.00  0.00
ATOM    960  O   MET A  95      29.820  33.690  72.260  1.00  0.00
ATOM    961  N   PRO A  96      29.090  31.670  71.680  1.00  0.00
ATOM    962  CA  PRO A  96      28.470  31.390  72.990  1.00  0.00
ATOM    963  CB  PRO A  96      27.960  29.950  72.890  1.00  0.00
ATOM    964  CG  PRO A  96      27.630  29.900  71.390  1.00  0.00
ATOM    965  CD  PRO A  96      28.630  30.760  70.620  1.00  0.00
ATOM    966  C   PRO A  96      29.360  31.580  74.220  1.00  0.00
ATOM    967  O   PRO A  96      29.010  32.450  75.010  1.00  0.00
ATOM    968  N   LEU A  97      30.490  30.870  74.280  1.00  0.00
ATOM    969  H   LEU A  97      30.810  30.390  73.470  1.00  0.00
ATOM    970  CA  LEU A  97      31.410  30.980  75.420  1.00  0.00
ATOM    971  CB  LEU A  97      32.490  29.900  75.390  1.00  0.00
ATOM    972  CG  LEU A  97      31.900  28.490  75.450  1.00  0.00
ATOM    973  CD1 LEU A  97      32.860  27.470  74.840  1.00  0.00
ATOM    974  CD2 LEU A  97      31.590  28.140  76.910  1.00  0.00
ATOM    975  C   LEU A  97      31.930  32.380  75.770  1.00  0.00
ATOM    976  O   LEU A  97      31.500  33.070  76.700  1.00  0.00
ATOM    977  N   ASP A  98      32.430  32.900  74.650  1.00  0.00
ATOM    978  H   ASP A  98      32.400  32.510  73.730  1.00  0.00
ATOM    979  CA  ASP A  98      33.060  34.230  74.640  1.00  0.00
ATOM    980  CB  ASP A  98      33.710  34.650  73.320  1.00  0.00
ATOM    981  CG  ASP A  98      34.690  35.790  73.570  1.00  0.00
ATOM    982  OD1 ASP A  98      34.360  36.910  73.110  1.00  0.00
ATOM    983  OD2 ASP A  98      35.880  35.530  73.860  1.00  0.00
ATOM    984  C   ASP A  98      32.070  35.300  75.100  1.00  0.00
ATOM    985  O   ASP A  98      32.420  36.150  75.930  1.00  0.00
ATOM    986  N   GLY A  99      30.890  35.300  74.500  1.00  0.00
ATOM    987  H   GLY A  99      30.800  34.790  73.650  1.00  0.00
ATOM    988  CA  GLY A  99      29.830  36.270  74.820  1.00  0.00
ATOM    989  C   GLY A  99      29.310  36.130  76.260  1.00  0.00
ATOM    990  O   GLY A  99      29.160  37.150  76.930  1.00  0.00
ATOM    991  N   MET A 100      29.270  34.890  76.730  1.00  0.00
ATOM    992  H   MET A 100      29.690  34.120  76.250  1.00  0.00
ATOM    993  CA  MET A 100      28.890  34.610  78.120  1.00  0.00
ATOM    994  CB  MET A 100      28.870  33.150  78.580  1.00  0.00
ATOM    995  CG  MET A 100      27.510  32.500  78.280  1.00  0.00
ATOM    996  SD  MET A 100      27.250  30.720  78.630  1.00  0.00
ATOM    997  CE  MET A 100      26.590  30.320  77.020  1.00  0.00
ATOM    998  C   MET A 100      29.770  35.370  79.100  1.00  0.00
ATOM    999  O   MET A 100      29.320  35.670  80.210  1.00  0.00
ATOM   1000  N   TRP A 101      31.030  35.590  78.740  1.00  0.00
ATOM   1001  H   TRP A 101      31.410  35.020  78.010  1.00  0.00
ATOM   1002  CA  TRP A 101      32.030  36.480  79.360  1.00  0.00
ATOM   1003  CB  TRP A 101      33.460  36.010  79.060  1.00  0.00
ATOM   1004  CG  TRP A 101      33.740  34.530  79.290  1.00  0.00
ATOM   1005  CD1 TRP A 101      33.380  33.780  80.330  1.00  0.00
ATOM   1006  HD1 TRP A 101      32.870  34.150  81.210  1.00  0.00
ATOM   1007  CD2 TRP A 101      34.360  33.700  78.360  1.00  0.00
ATOM   1008  NE1 TRP A 101      33.670  32.510  80.070  1.00  0.00
ATOM   1009  HE1 TRP A 101      33.260  31.680  80.450  1.00  0.00
ATOM   1010  CE2 TRP A 101      34.270  32.410  78.880  1.00  0.00
ATOM   1011  CE3 TRP A 101      35.260  34.040  77.360  1.00  0.00
ATOM   1012  HE3 TRP A 101      35.250  35.010  76.860  1.00  0.00
ATOM   1013  CZ2 TRP A 101      35.080  31.430  78.320  1.00  0.00
ATOM   1014  HZ2 TRP A 101      35.300  30.550  78.910  1.00  0.00
ATOM   1015  CZ3 TRP A 101      35.990  33.020  76.750  1.00  0.00
ATOM   1016  HZ3 TRP A 101      36.790  33.270  76.050  1.00  0.00
ATOM   1017  CH2 TRP A 101      35.870  31.710  77.210  1.00  0.00
ATOM   1018  HH2 TRP A 101      36.280  30.890  76.630  1.00  0.00
ATOM   1019  C   TRP A 101      31.910  38.000  79.280  1.00  0.00
ATOM   1020  O   TRP A 101      32.390  38.690  80.180  1.00  0.00
ATOM   1021  N   ASN A 102      31.240  38.430  78.210  1.00  0.00
ATOM   1022  H   ASN A 102      30.760  37.820  77.590  1.00  0.00
ATOM   1023  CA  ASN A 102      30.930  39.850  77.990  1.00  0.00
ATOM   1024  CB  ASN A 102      31.080  40.030  76.480  1.00  0.00
ATOM   1025  CG  ASN A 102      32.520  40.140  75.990  1.00  0.00
ATOM   1026  OD1 ASN A 102      33.210  41.110  76.310  1.00  0.00
ATOM   1027  ND2 ASN A 102      33.120  39.060  75.480  1.00  0.00
ATOM   1028 HD21 ASN A 102      32.780  38.130  75.380  1.00  0.00
ATOM   1029 HD22 ASN A 102      34.100  39.190  75.370  1.00  0.00
ATOM   1030  C   ASN A 102      29.560  40.350  78.420  1.00  0.00
ATOM   1031  O   ASN A 102      29.600  41.400  79.070  1.00  0.00
ATOM   1032  N   ILE A 103      28.500  39.560  78.290  1.00  0.00
ATOM   1033  H   ILE A 103      28.390  38.830  77.610  1.00  0.00
ATOM   1034  CA  ILE A 103      27.270  39.710  79.080  1.00  0.00
ATOM   1035  CB  ILE A 103      26.010  39.410  78.270  1.00  0.00
ATOM   1036  CG1 ILE A 103      26.200  38.640  76.970  1.00  0.00
ATOM   1037  CG2 ILE A 103      25.120  40.580  77.850  1.00  0.00
ATOM   1038  CD  ILE A 103      25.000  37.800  76.510  1.00  0.00
ATOM   1039  C   ILE A 103      27.170  39.240  80.530  1.00  0.00
ATOM   1040  O   ILE A 103      28.020  38.420  80.860  1.00  0.00
ATOM   1041  N   THR A 104      26.370  39.770  81.460  1.00  0.00
ATOM   1042  H   THR A 104      25.840  40.570  81.190  1.00  0.00
ATOM   1043  CA  THR A 104      26.540  39.500  82.900  1.00  0.00
ATOM   1044  CB  THR A 104      25.940  40.520  83.860  1.00  0.00
ATOM   1045  OG1 THR A 104      25.920  41.870  83.390  1.00  0.00
ATOM   1046  HG1 THR A 104      25.110  42.330  83.720  1.00  0.00
ATOM   1047  CG2 THR A 104      26.670  40.500  85.210  1.00  0.00
ATOM   1048  C   THR A 104      25.880  38.150  83.160  1.00  0.00
ATOM   1049  O   THR A 104      24.730  38.090  83.590  1.00  0.00
ATOM   1050  N   VAL A 105      26.510  37.060  82.720  1.00  0.00
ATOM   1051  H   VAL A 105      27.430  37.040  82.330  1.00  0.00
ATOM   1052  CA  VAL A 105      26.050  35.680  82.920  1.00  0.00
ATOM   1053  CB  VAL A 105      25.860  34.850  81.640  1.00  0.00
ATOM   1054  CG1 VAL A 105      24.810  33.750  81.820  1.00  0.00
ATOM   1055  CG2 VAL A 105      25.430  35.670  80.430  1.00  0.00
ATOM   1056  C   VAL A 105      27.010  34.910  83.830  1.00  0.00
ATOM   1057  O   VAL A 105      28.220  35.120  83.720  1.00  0.00
ATOM   1058  N   GLN A 106      26.350  34.090  84.650  1.00  0.00
ATOM   1059  H   GLN A 106      25.360  34.020  84.560  1.00  0.00
ATOM   1060  CA  GLN A 106      27.050  33.270  85.650  1.00  0.00
ATOM   1061  CB  GLN A 106      26.120  32.710  86.730  1.00  0.00
ATOM   1062  CG  GLN A 106      25.780  33.830  87.710  1.00  0.00
ATOM   1063  CD  GLN A 106      24.710  33.400  88.720  1.00  0.00
ATOM   1064  OE1 GLN A 106      24.810  32.320  89.290  1.00  0.00
ATOM   1065  NE2 GLN A 106      23.890  34.320  89.200  1.00  0.00
ATOM   1066 HE21 GLN A 106      24.120  35.240  88.870  1.00  0.00
ATOM   1067 HE22 GLN A 106      23.240  34.340  89.970  1.00  0.00
ATOM   1068  C   GLN A 106      27.960  32.180  85.080  1.00  0.00
ATOM   1069  O   GLN A 106      27.820  30.960  85.220  1.00  0.00
ATOM   1070  N   TRP A 107      29.160  32.630  84.740  1.00  0.00
ATOM   1071  H   TRP A 107      29.290  33.610  84.560  1.00  0.00
ATOM   1072  CA  TRP A 107      30.300  31.740  84.470  1.00  0.00
ATOM   1073  CB  TRP A 107      31.060  32.390  83.310  1.00  0.00
ATOM   1074  CG  TRP A 107      31.940  31.240  82.790  1.00  0.00
ATOM   1075  CD1 TRP A 107      33.150  30.890  83.220  1.00  0.00
ATOM   1076  HD1 TRP A 107      33.750  31.400  83.980  1.00  0.00
ATOM   1077  CD2 TRP A 107      31.540  30.240  81.930  1.00  0.00
ATOM   1078  NE1 TRP A 107      33.530  29.730  82.710  1.00  0.00
ATOM   1079  HE1 TRP A 107      34.420  29.280  82.780  1.00  0.00
ATOM   1080  CE2 TRP A 107      32.550  29.280  81.930  1.00  0.00
ATOM   1081  CE3 TRP A 107      30.490  30.100  81.030  1.00  0.00
ATOM   1082  HE3 TRP A 107      30.000  31.030  80.760  1.00  0.00
ATOM   1083  CZ2 TRP A 107      32.460  28.150  81.130  1.00  0.00
ATOM   1084  HZ2 TRP A 107      33.400  27.590  81.010  1.00  0.00
ATOM   1085  CZ3 TRP A 107      30.350  28.970  80.230  1.00  0.00
ATOM   1086  HZ3 TRP A 107      29.720  28.940  79.340  1.00  0.00
ATOM   1087  CH2 TRP A 107      31.390  28.040  80.260  1.00  0.00
ATOM   1088  HH2 TRP A 107      31.140  27.080  79.800  1.00  0.00
ATOM   1089  C   TRP A 107      31.260  31.790  85.660  1.00  0.00
ATOM   1090  O   TRP A 107      31.170  32.650  86.530  1.00  0.00
ATOM   1091  N   TYR A 108      32.120  30.780  85.810  1.00  0.00
ATOM   1092  H   TYR A 108      32.270  30.270  84.960  1.00  0.00
ATOM   1093  CA  TYR A 108      32.930  30.510  87.010  1.00  0.00
ATOM   1094  CB  TYR A 108      33.100  28.990  87.150  1.00  0.00
ATOM   1095  CG  TYR A 108      31.800  28.360  87.640  1.00  0.00
ATOM   1096  CD1 TYR A 108      30.720  28.200  86.770  1.00  0.00
ATOM   1097  HD1 TYR A 108      30.870  28.540  85.740  1.00  0.00
ATOM   1098  CD2 TYR A 108      31.730  27.820  88.920  1.00  0.00
ATOM   1099  HD2 TYR A 108      32.520  27.880  89.660  1.00  0.00
ATOM   1100  CE1 TYR A 108      29.570  27.500  87.100  1.00  0.00
ATOM   1101  HE1 TYR A 108      28.780  27.400  86.350  1.00  0.00
ATOM   1102  CE2 TYR A 108      30.610  27.070  89.280  1.00  0.00
ATOM   1103  HE2 TYR A 108      30.320  26.940  90.320  1.00  0.00
ATOM   1104  CZ  TYR A 108      29.570  26.920  88.360  1.00  0.00
ATOM   1105  OH  TYR A 108      28.390  26.530  88.910  1.00  0.00
ATOM   1106  HH  TYR A 108      27.790  26.700  88.140  1.00  0.00
ATOM   1107  C   TYR A 108      34.360  31.040  87.080  1.00  0.00
ATOM   1108  O   TYR A 108      34.930  31.360  86.040  1.00  0.00
ATOM   1109  N   ALA A 109      34.880  31.350  88.270  1.00  0.00
ATOM   1110  H   ALA A 109      34.450  30.980  89.090  1.00  0.00
ATOM   1111  CA  ALA A 109      36.200  31.940  88.510  1.00  0.00
ATOM   1112  CB  ALA A 109      36.340  32.560  89.900  1.00  0.00
ATOM   1113  C   ALA A 109      37.370  30.980  88.280  1.00  0.00
ATOM   1114  O   ALA A 109      37.640  30.040  89.040  1.00  0.00
ATOM   1115  N   GLY A 110      38.190  31.290  87.280  1.00  0.00
ATOM   1116  H   GLY A 110      38.110  32.230  86.930  1.00  0.00
ATOM   1117  CA  GLY A 110      39.420  30.540  86.990  1.00  0.00
ATOM   1118  C   GLY A 110      39.040  29.200  86.360  1.00  0.00
ATOM   1119  O   GLY A 110      39.420  28.160  86.890  1.00  0.00
ATOM   1120  N   GLU A 111      38.600  29.260  85.100  1.00  0.00
ATOM   1121  H   GLU A 111      38.620  30.080  84.530  1.00  0.00
ATOM   1122  CA  GLU A 111      37.910  28.100  84.520  1.00  0.00
ATOM   1123  CB  GLU A 111      36.460  28.550  84.340  1.00  0.00
ATOM   1124  CG  GLU A 111      35.420  27.480  83.990  1.00  0.00
ATOM   1125  CD  GLU A 111      35.460  27.020  82.530  1.00  0.00
ATOM   1126  OE1 GLU A 111      35.170  25.810  82.360  1.00  0.00
ATOM   1127  OE2 GLU A 111      35.810  27.780  81.610  1.00  0.00
ATOM   1128  C   GLU A 111      38.650  27.420  83.370  1.00  0.00
ATOM   1129  O   GLU A 111      39.450  28.130  82.760  1.00  0.00
ATOM   1130  N   LEU A 112      38.420  26.120  83.220  1.00  0.00
ATOM   1131  H   LEU A 112      37.640  25.640  83.630  1.00  0.00
ATOM   1132  CA  LEU A 112      39.080  25.230  82.270  1.00  0.00
ATOM   1133  CB  LEU A 112      38.600  23.810  82.550  1.00  0.00
ATOM   1134  CG  LEU A 112      39.420  22.750  81.820  1.00  0.00
ATOM   1135  CD1 LEU A 112      39.730  21.610  82.800  1.00  0.00
ATOM   1136  CD2 LEU A 112      38.600  22.110  80.700  1.00  0.00
ATOM   1137  C   LEU A 112      38.780  25.510  80.790  1.00  0.00
ATOM   1138  O   LEU A 112      39.720  25.780  80.050  1.00  0.00
ATOM   1139  N   LEU A 113      37.500  25.640  80.460  1.00  0.00
ATOM   1140  H   LEU A 113      36.780  25.870  81.110  1.00  0.00
ATOM   1141  CA  LEU A 113      37.200  25.980  79.060  1.00  0.00
ATOM   1142  CB  LEU A 113      35.710  26.050  78.730  1.00  0.00
ATOM   1143  CG  LEU A 113      34.980  24.700  78.770  1.00  0.00
ATOM   1144  CD1 LEU A 113      33.520  24.990  79.100  1.00  0.00
ATOM   1145  CD2 LEU A 113      35.120  24.030  77.400  1.00  0.00
ATOM   1146  C   LEU A 113      37.740  27.380  78.750  1.00  0.00
ATOM   1147  O   LEU A 113      38.260  27.600  77.660  1.00  0.00
ATOM   1148  N   CYS A 114      37.600  28.330  79.670  1.00  0.00
ATOM   1149  H   CYS A 114      36.930  28.220  80.420  1.00  0.00
ATOM   1150  CA  CYS A 114      38.190  29.670  79.590  1.00  0.00
ATOM   1151  CB  CYS A 114      38.060  30.400  80.920  1.00  0.00
ATOM   1152  SG  CYS A 114      36.330  30.750  81.400  1.00  0.00
ATOM   1153  C   CYS A 114      39.680  29.650  79.260  1.00  0.00
ATOM   1154  O   CYS A 114      40.080  30.290  78.290  1.00  0.00
ATOM   1155  N   LYS A 115      40.460  28.990  80.110  1.00  0.00
ATOM   1156  H   LYS A 115      40.070  28.730  81.000  1.00  0.00
ATOM   1157  CA  LYS A 115      41.850  28.570  79.870  1.00  0.00
ATOM   1158  CB  LYS A 115      42.390  27.580  80.900  1.00  0.00
ATOM   1159  CG  LYS A 115      42.580  28.050  82.340  1.00  0.00
ATOM   1160  CD  LYS A 115      43.470  27.070  83.110  1.00  0.00
ATOM   1161  CE  LYS A 115      43.610  27.580  84.550  1.00  0.00
ATOM   1162  NZ  LYS A 115      44.970  27.300  85.030  1.00  0.00
ATOM   1163  HZ1 LYS A 115      45.430  26.610  84.480  1.00  0.00
ATOM   1164  HZ2 LYS A 115      45.520  28.130  84.990  1.00  0.00
ATOM   1165  HZ3 LYS A 115      44.950  27.010  85.980  1.00  0.00
ATOM   1166  C   LYS A 115      42.090  28.100  78.440  1.00  0.00
ATOM   1167  O   LYS A 115      42.900  28.690  77.730  1.00  0.00
ATOM   1168  N   VAL A 116      41.320  27.140  77.940  1.00  0.00
ATOM   1169  H   VAL A 116      40.560  26.730  78.440  1.00  0.00
ATOM   1170  CA  VAL A 116      41.390  26.580  76.580  1.00  0.00
ATOM   1171  CB  VAL A 116      40.480  25.360  76.440  1.00  0.00
ATOM   1172  CG1 VAL A 116      40.530  24.660  75.080  1.00  0.00
ATOM   1173  CG2 VAL A 116      40.640  24.350  77.580  1.00  0.00
ATOM   1174  C   VAL A 116      41.140  27.620  75.490  1.00  0.00
ATOM   1175  O   VAL A 116      41.940  27.810  74.560  1.00  0.00
ATOM   1176  N   LEU A 117      40.030  28.340  75.580  1.00  0.00
ATOM   1177  H   LEU A 117      39.370  28.210  76.320  1.00  0.00
ATOM   1178  CA  LEU A 117      39.610  29.310  74.550  1.00  0.00
ATOM   1179  CB  LEU A 117      38.140  29.730  74.710  1.00  0.00
ATOM   1180  CG  LEU A 117      37.500  30.160  73.390  1.00  0.00
ATOM   1181  CD1 LEU A 117      37.590  29.050  72.340  1.00  0.00
ATOM   1182  CD2 LEU A 117      36.060  30.640  73.600  1.00  0.00
ATOM   1183  C   LEU A 117      40.440  30.600  74.480  1.00  0.00
ATOM   1184  O   LEU A 117      40.730  30.890  73.320  1.00  0.00
ATOM   1185  N   SER A 118      41.150  30.930  75.550  1.00  0.00
ATOM   1186  H   SER A 118      40.890  30.540  76.430  1.00  0.00
ATOM   1187  CA  SER A 118      42.190  31.960  75.680  1.00  0.00
ATOM   1188  CB  SER A 118      42.530  32.010  77.170  1.00  0.00
ATOM   1189  OG  SER A 118      41.550  32.880  77.730  1.00  0.00
ATOM   1190  HG  SER A 118      41.780  33.850  77.790  1.00  0.00
ATOM   1191  C   SER A 118      43.440  31.740  74.820  1.00  0.00
ATOM   1192  O   SER A 118      44.000  32.750  74.410  1.00  0.00
ATOM   1193  N   TYR A 119      43.910  30.500  74.840  1.00  0.00
ATOM   1194  H   TYR A 119      43.600  29.830  75.520  1.00  0.00
ATOM   1195  CA  TYR A 119      44.920  29.980  73.910  1.00  0.00
ATOM   1196  CB  TYR A 119      45.800  28.880  74.510  1.00  0.00
ATOM   1197  CG  TYR A 119      46.730  29.420  75.600  1.00  0.00
ATOM   1198  CD1 TYR A 119      48.050  29.670  75.260  1.00  0.00
ATOM   1199  HD1 TYR A 119      48.490  29.340  74.320  1.00  0.00
ATOM   1200  CD2 TYR A 119      46.260  29.690  76.880  1.00  0.00
ATOM   1201  HD2 TYR A 119      45.350  29.300  77.350  1.00  0.00
ATOM   1202  CE1 TYR A 119      48.860  30.310  76.190  1.00  0.00
ATOM   1203  HE1 TYR A 119      49.930  30.160  76.020  1.00  0.00
ATOM   1204  CE2 TYR A 119      47.070  30.280  77.830  1.00  0.00
ATOM   1205  HE2 TYR A 119      46.710  30.500  78.840  1.00  0.00
ATOM   1206  CZ  TYR A 119      48.340  30.680  77.430  1.00  0.00
ATOM   1207  OH  TYR A 119      48.970  31.650  78.140  1.00  0.00
ATOM   1208  HH  TYR A 119      48.220  32.230  78.440  1.00  0.00
ATOM   1209  C   TYR A 119      44.630  29.650  72.450  1.00  0.00
ATOM   1210  O   TYR A 119      45.450  29.740  71.530  1.00  0.00
ATOM   1211  N   LEU A 120      43.470  29.070  72.170  1.00  0.00
ATOM   1212  H   LEU A 120      42.830  28.760  72.870  1.00  0.00
ATOM   1213  CA  LEU A 120      42.940  28.790  70.820  1.00  0.00
ATOM   1214  CB  LEU A 120      41.730  27.870  70.970  1.00  0.00
ATOM   1215  CG  LEU A 120      41.990  26.450  71.490  1.00  0.00
ATOM   1216  CD1 LEU A 120      40.710  25.650  71.740  1.00  0.00
ATOM   1217  CD2 LEU A 120      42.940  25.660  70.590  1.00  0.00
ATOM   1218  C   LEU A 120      42.640  29.930  69.850  1.00  0.00
ATOM   1219  O   LEU A 120      41.560  30.180  69.330  1.00  0.00
ATOM   1220  N   LYS A 121      43.690  30.730  69.640  1.00  0.00
ATOM   1221  H   LYS A 121      44.540  30.610  70.150  1.00  0.00
ATOM   1222  CA  LYS A 121      43.490  31.810  68.670  1.00  0.00
ATOM   1223  CB  LYS A 121      43.710  33.110  69.450  1.00  0.00
ATOM   1224  CG  LYS A 121      42.670  33.470  70.520  1.00  0.00
ATOM   1225  CD  LYS A 121      41.220  33.530  70.050  1.00  0.00
ATOM   1226  CE  LYS A 121      40.270  34.000  71.160  1.00  0.00
ATOM   1227  NZ  LYS A 121      38.840  33.820  70.860  1.00  0.00
ATOM   1228  HZ1 LYS A 121      38.660  33.000  70.320  1.00  0.00
ATOM   1229  HZ2 LYS A 121      38.330  33.850  71.720  1.00  0.00
ATOM   1230  HZ3 LYS A 121      38.580  34.580  70.270  1.00  0.00
ATOM   1231  C   LYS A 121      44.400  31.680  67.450  1.00  0.00
ATOM   1232  O   LYS A 121      44.950  32.700  67.020  1.00  0.00
ATOM   1233  N   LEU A 122      44.100  30.570  66.790  1.00  0.00
ATOM   1234  H   LEU A 122      43.210  30.150  66.960  1.00  0.00
ATOM   1235  CA  LEU A 122      44.990  29.930  65.810  1.00  0.00
ATOM   1236  CB  LEU A 122      45.510  28.600  66.370  1.00  0.00
ATOM   1237  CG  LEU A 122      46.980  28.390  65.980  1.00  0.00
ATOM   1238  CD1 LEU A 122      47.980  29.100  66.900  1.00  0.00
ATOM   1239  CD2 LEU A 122      47.310  26.920  66.240  1.00  0.00
ATOM   1240  C   LEU A 122      44.420  29.720  64.400  1.00  0.00
ATOM   1241  O   LEU A 122      44.970  30.260  63.450  1.00  0.00
ATOM   1242  N   PHE A 123      43.430  28.830  64.350  1.00  0.00
ATOM   1243  H   PHE A 123      43.140  28.470  65.240  1.00  0.00
ATOM   1244  CA  PHE A 123      42.920  28.200  63.130  1.00  0.00
ATOM   1245  CB  PHE A 123      42.000  27.050  63.540  1.00  0.00
ATOM   1246  CG  PHE A 123      42.810  25.950  64.220  1.00  0.00
ATOM   1247  CD1 PHE A 123      43.780  25.210  63.560  1.00  0.00
ATOM   1248  HD1 PHE A 123      43.950  25.480  62.520  1.00  0.00
ATOM   1249  CD2 PHE A 123      42.670  25.810  65.600  1.00  0.00
ATOM   1250  HD2 PHE A 123      41.840  26.320  66.100  1.00  0.00
ATOM   1251  CE1 PHE A 123      44.620  24.420  64.340  1.00  0.00
ATOM   1252  HE1 PHE A 123      45.610  24.140  63.960  1.00  0.00
ATOM   1253  CE2 PHE A 123      43.470  24.970  66.360  1.00  0.00
ATOM   1254  HE2 PHE A 123      43.150  24.660  67.360  1.00  0.00
ATOM   1255  CZ  PHE A 123      44.490  24.290  65.710  1.00  0.00
ATOM   1256  HZ  PHE A 123      45.250  23.720  66.240  1.00  0.00
ATOM   1257  C   PHE A 123      42.350  29.080  62.010  1.00  0.00
ATOM   1258  O   PHE A 123      43.180  29.370  61.160  1.00  0.00
ATOM   1259  N   SER A 124      41.360  29.900  62.370  1.00  0.00
ATOM   1260  H   SER A 124      41.090  29.810  63.330  1.00  0.00
ATOM   1261  CA  SER A 124      40.840  30.960  61.500  1.00  0.00
ATOM   1262  CB  SER A 124      39.540  31.610  61.990  1.00  0.00
ATOM   1263  OG  SER A 124      39.680  32.180  63.290  1.00  0.00
ATOM   1264  HG  SER A 124      39.540  31.410  63.920  1.00  0.00
ATOM   1265  C   SER A 124      41.860  32.020  61.090  1.00  0.00
ATOM   1266  O   SER A 124      42.080  32.220  59.900  1.00  0.00
ATOM   1267  N   MET A 125      42.620  32.350  62.140  1.00  0.00
ATOM   1268  H   MET A 125      42.380  32.010  63.040  1.00  0.00
ATOM   1269  CA  MET A 125      43.620  33.420  62.020  1.00  0.00
ATOM   1270  CB  MET A 125      44.070  33.980  63.370  1.00  0.00
ATOM   1271  CG  MET A 125      42.950  34.790  64.040  1.00  0.00
ATOM   1272  SD  MET A 125      42.380  36.410  63.420  1.00  0.00
ATOM   1273  CE  MET A 125      43.960  37.240  63.390  1.00  0.00
ATOM   1274  C   MET A 125      44.870  33.150  61.170  1.00  0.00
ATOM   1275  O   MET A 125      45.490  34.090  60.670  1.00  0.00
ATOM   1276  N   TYR A 126      45.220  31.870  61.100  1.00  0.00
ATOM   1277  H   TYR A 126      44.660  31.190  61.570  1.00  0.00
ATOM   1278  CA  TYR A 126      46.380  31.530  60.260  1.00  0.00
ATOM   1279  CB  TYR A 126      47.610  31.150  61.080  1.00  0.00
ATOM   1280  CG  TYR A 126      48.130  32.260  61.990  1.00  0.00
ATOM   1281  CD1 TYR A 126      48.890  33.270  61.410  1.00  0.00
ATOM   1282  HD1 TYR A 126      49.200  33.090  60.380  1.00  0.00
ATOM   1283  CD2 TYR A 126      47.790  32.260  63.340  1.00  0.00
ATOM   1284  HD2 TYR A 126      47.260  31.450  63.840  1.00  0.00
ATOM   1285  CE1 TYR A 126      49.250  34.390  62.140  1.00  0.00
ATOM   1286  HE1 TYR A 126      49.690  35.280  61.690  1.00  0.00
ATOM   1287  CE2 TYR A 126      48.190  33.360  64.080  1.00  0.00
ATOM   1288  HE2 TYR A 126      47.670  33.550  65.020  1.00  0.00
ATOM   1289  CZ  TYR A 126      48.820  34.440  63.460  1.00  0.00
ATOM   1290  OH  TYR A 126      48.900  35.590  64.170  1.00  0.00
ATOM   1291  HH  TYR A 126      48.950  36.340  63.500  1.00  0.00
ATOM   1292  C   TYR A 126      46.140  30.490  59.170  1.00  0.00
ATOM   1293  O   TYR A 126      46.550  30.690  58.020  1.00  0.00
ATOM   1294  N   ALA A 127      45.540  29.320  59.380  1.00  0.00
ATOM   1295  H   ALA A 127      45.160  28.970  60.240  1.00  0.00
ATOM   1296  CA  ALA A 127      45.550  28.260  58.360  1.00  0.00
ATOM   1297  CB  ALA A 127      45.010  26.900  58.830  1.00  0.00
ATOM   1298  C   ALA A 127      44.950  28.700  57.020  1.00  0.00
ATOM   1299  O   ALA A 127      45.580  28.360  56.020  1.00  0.00
ATOM   1300  N   PRO A 128      43.800  29.330  56.850  1.00  0.00
ATOM   1301  CA  PRO A 128      43.340  29.900  55.570  1.00  0.00
ATOM   1302  CB  PRO A 128      42.000  30.580  55.840  1.00  0.00
ATOM   1303  CG  PRO A 128      41.420  29.510  56.770  1.00  0.00
ATOM   1304  CD  PRO A 128      42.610  29.340  57.720  1.00  0.00
ATOM   1305  C   PRO A 128      44.330  30.860  54.900  1.00  0.00
ATOM   1306  O   PRO A 128      44.820  30.570  53.810  1.00  0.00
ATOM   1307  N   ALA A 129      44.780  31.900  55.600  1.00  0.00
ATOM   1308  H   ALA A 129      44.130  32.310  56.240  1.00  0.00
ATOM   1309  CA  ALA A 129      45.810  32.830  55.120  1.00  0.00
ATOM   1310  CB  ALA A 129      46.110  34.000  56.060  1.00  0.00
ATOM   1311  C   ALA A 129      47.150  32.230  54.700  1.00  0.00
ATOM   1312  O   ALA A 129      47.480  32.220  53.520  1.00  0.00
ATOM   1313  N   PHE A 130      47.600  31.330  55.570  1.00  0.00
ATOM   1314  H   PHE A 130      47.050  31.150  56.400  1.00  0.00
ATOM   1315  CA  PHE A 130      48.780  30.490  55.320  1.00  0.00
ATOM   1316  CB  PHE A 130      49.130  29.680  56.560  1.00  0.00
ATOM   1317  CG  PHE A 130      50.520  29.060  56.480  1.00  0.00
ATOM   1318  CD1 PHE A 130      50.780  27.700  56.380  1.00  0.00
ATOM   1319  HD1 PHE A 130      49.990  27.020  56.070  1.00  0.00
ATOM   1320  CD2 PHE A 130      51.560  29.840  56.970  1.00  0.00
ATOM   1321  HD2 PHE A 130      51.270  30.870  57.180  1.00  0.00
ATOM   1322  CE1 PHE A 130      52.020  27.200  56.780  1.00  0.00
ATOM   1323  HE1 PHE A 130      52.160  26.120  56.650  1.00  0.00
ATOM   1324  CE2 PHE A 130      52.790  29.370  57.430  1.00  0.00
ATOM   1325  HE2 PHE A 130      53.570  30.070  57.750  1.00  0.00
ATOM   1326  CZ  PHE A 130      53.000  28.000  57.350  1.00  0.00
ATOM   1327  HZ  PHE A 130      53.840  27.500  57.830  1.00  0.00
ATOM   1328  C   PHE A 130      48.680  29.620  54.060  1.00  0.00
ATOM   1329  O   PHE A 130      49.650  29.520  53.310  1.00  0.00
ATOM   1330  N   MET A 131      47.550  28.990  53.760  1.00  0.00
ATOM   1331  H   MET A 131      46.790  28.740  54.370  1.00  0.00
ATOM   1332  CA  MET A 131      47.380  28.460  52.400  1.00  0.00
ATOM   1333  CB  MET A 131      46.190  27.490  52.390  1.00  0.00
ATOM   1334  CG  MET A 131      46.230  26.200  53.200  1.00  0.00
ATOM   1335  SD  MET A 131      47.390  24.920  52.580  1.00  0.00
ATOM   1336  CE  MET A 131      46.840  24.870  50.880  1.00  0.00
ATOM   1337  C   MET A 131      47.140  29.460  51.270  1.00  0.00
ATOM   1338  O   MET A 131      47.670  29.330  50.170  1.00  0.00
ATOM   1339  N   MET A 132      46.420  30.530  51.580  1.00  0.00
ATOM   1340  H   MET A 132      45.950  30.640  52.450  1.00  0.00
ATOM   1341  CA  MET A 132      46.140  31.640  50.660  1.00  0.00
ATOM   1342  CB  MET A 132      45.170  32.620  51.320  1.00  0.00
ATOM   1343  CG  MET A 132      43.680  32.260  51.210  1.00  0.00
ATOM   1344  SD  MET A 132      43.030  32.440  49.510  1.00  0.00
ATOM   1345  CE  MET A 132      41.260  32.410  49.760  1.00  0.00
ATOM   1346  C   MET A 132      47.300  32.200  49.830  1.00  0.00
ATOM   1347  O   MET A 132      47.430  31.850  48.650  1.00  0.00
ATOM   1348  N   VAL A 133      48.360  32.620  50.510  1.00  0.00
ATOM   1349  H   VAL A 133      48.250  32.640  51.500  1.00  0.00
ATOM   1350  CA  VAL A 133      49.600  33.100  49.880  1.00  0.00
ATOM   1351  CB  VAL A 133      50.470  33.830  50.890  1.00  0.00
ATOM   1352  CG1 VAL A 133      49.780  35.040  51.530  1.00  0.00
ATOM   1353  CG2 VAL A 133      50.930  32.950  52.060  1.00  0.00
ATOM   1354  C   VAL A 133      50.290  31.930  49.170  1.00  0.00
ATOM   1355  O   VAL A 133      50.930  32.230  48.170  1.00  0.00
ATOM   1356  N   VAL A 134      50.280  30.690  49.650  1.00  0.00
ATOM   1357  H   VAL A 134      49.640  30.390  50.360  1.00  0.00
ATOM   1358  CA  VAL A 134      50.820  29.540  48.920  1.00  0.00
ATOM   1359  CB  VAL A 134      50.880  28.330  49.860  1.00  0.00
ATOM   1360  CG1 VAL A 134      51.440  27.080  49.160  1.00  0.00
ATOM   1361  CG2 VAL A 134      51.760  28.580  51.080  1.00  0.00
ATOM   1362  C   VAL A 134      50.230  29.340  47.520  1.00  0.00
ATOM   1363  O   VAL A 134      50.950  29.540  46.550  1.00  0.00
ATOM   1364  N   ILE A 135      48.910  29.240  47.340  1.00  0.00
ATOM   1365  H   ILE A 135      48.240  29.490  48.040  1.00  0.00
ATOM   1366  CA  ILE A 135      48.260  29.120  46.030  1.00  0.00
ATOM   1367  CB  ILE A 135      46.910  28.410  46.130  1.00  0.00
ATOM   1368  CG1 ILE A 135      45.970  28.850  47.250  1.00  0.00
ATOM   1369  CG2 ILE A 135      47.240  26.930  46.370  1.00  0.00
ATOM   1370  CD  ILE A 135      44.540  28.340  47.080  1.00  0.00
ATOM   1371  C   ILE A 135      48.230  30.380  45.160  1.00  0.00
ATOM   1372  O   ILE A 135      47.280  30.600  44.410  1.00  0.00
ATOM   1373  N   SER A 136      49.300  31.170  45.180  1.00  0.00
ATOM   1374  H   SER A 136      49.940  31.040  45.940  1.00  0.00
ATOM   1375  CA  SER A 136      49.520  32.350  44.330  1.00  0.00
ATOM   1376  CB  SER A 136      49.460  33.650  45.140  1.00  0.00
ATOM   1377  OG  SER A 136      50.570  34.010  45.960  1.00  0.00
ATOM   1378  HG  SER A 136      50.500  33.490  46.810  1.00  0.00
ATOM   1379  C   SER A 136      50.890  32.250  43.650  1.00  0.00
ATOM   1380  O   SER A 136      51.090  33.010  42.710  1.00  0.00
ATOM   1381  N   LEU A 137      51.840  31.400  44.010  1.00  0.00
ATOM   1382  H   LEU A 137      51.930  31.140  44.970  1.00  0.00
ATOM   1383  CA  LEU A 137      53.010  30.990  43.210  1.00  0.00
ATOM   1384  CB  LEU A 137      53.810  30.050  44.120  1.00  0.00
ATOM   1385  CG  LEU A 137      54.390  30.790  45.330  1.00  0.00
ATOM   1386  CD1 LEU A 137      55.130  29.700  46.100  1.00  0.00
ATOM   1387  CD2 LEU A 137      55.390  31.900  44.990  1.00  0.00
ATOM   1388  C   LEU A 137      52.810  30.420  41.800  1.00  0.00
ATOM   1389  O   LEU A 137      52.270  29.340  41.570  1.00  0.00
ATOM   1390  N   ASP A 138      52.990  31.360  40.880  1.00  0.00
ATOM   1391  H   ASP A 138      53.180  32.320  41.090  1.00  0.00
ATOM   1392  CA  ASP A 138      53.130  31.170  39.430  1.00  0.00
ATOM   1393  CB  ASP A 138      52.580  32.460  38.820  1.00  0.00
ATOM   1394  CG  ASP A 138      52.070  32.390  37.380  1.00  0.00
ATOM   1395  OD1 ASP A 138      52.750  31.880  36.460  1.00  0.00
ATOM   1396  OD2 ASP A 138      50.850  32.650  37.240  1.00  0.00
ATOM   1397  C   ASP A 138      54.590  31.030  39.010  1.00  0.00
ATOM   1398  O   ASP A 138      55.460  31.760  39.480  1.00  0.00
ATOM   1399  N   ARG A 139      54.720  29.930  38.270  1.00  0.00
ATOM   1400  H   ARG A 139      53.960  29.280  38.230  1.00  0.00
ATOM   1401  CA  ARG A 139      55.950  29.420  37.650  1.00  0.00
ATOM   1402  CB  ARG A 139      56.450  30.290  36.500  1.00  0.00
ATOM   1403  CG  ARG A 139      55.890  30.020  35.110  1.00  0.00
ATOM   1404  CD  ARG A 139      56.810  30.570  34.020  1.00  0.00
ATOM   1405  NE  ARG A 139      56.810  32.020  34.280  1.00  0.00
ATOM   1406  HE  ARG A 139      56.260  32.250  35.080  1.00  0.00
ATOM   1407  CZ  ARG A 139      57.470  32.950  33.570  1.00  0.00
ATOM   1408  NH1 ARG A 139      58.270  32.730  32.520  1.00  0.00
ATOM   1409 HH11 ARG A 139      58.700  33.470  32.000  1.00  0.00
ATOM   1410 HH12 ARG A 139      58.360  31.760  32.280  1.00  0.00
ATOM   1411  NH2 ARG A 139      57.480  34.170  34.110  1.00  0.00
ATOM   1412 HH21 ARG A 139      56.970  34.230  34.970  1.00  0.00
ATOM   1413 HH22 ARG A 139      57.720  35.050  33.690  1.00  0.00
ATOM   1414  C   ARG A 139      57.130  29.010  38.540  1.00  0.00
ATOM   1415  O   ARG A 139      57.760  28.020  38.140  1.00  0.00
ATOM   1416  N   SER A 140      57.480  29.780  39.560  1.00  0.00
ATOM   1417  H   SER A 140      57.220  30.740  39.610  1.00  0.00
ATOM   1418  CA  SER A 140      58.530  29.370  40.500  1.00  0.00
ATOM   1419  CB  SER A 140      58.950  30.340  41.610  1.00  0.00
ATOM   1420  OG  SER A 140      57.730  30.710  42.260  1.00  0.00
ATOM   1421  HG  SER A 140      57.760  31.660  42.580  1.00  0.00
ATOM   1422  C   SER A 140      58.270  28.010  41.150  1.00  0.00
ATOM   1423  O   SER A 140      59.230  27.260  41.070  1.00  0.00
ATOM   1424  N   LEU A 141      57.110  27.910  41.810  1.00  0.00
ATOM   1425  H   LEU A 141      56.720  28.720  42.250  1.00  0.00
ATOM   1426  CA  LEU A 141      56.480  26.660  42.250  1.00  0.00
ATOM   1427  CB  LEU A 141      56.320  26.680  43.770  1.00  0.00
ATOM   1428  CG  LEU A 141      57.650  26.480  44.500  1.00  0.00
ATOM   1429  CD1 LEU A 141      57.440  26.440  46.010  1.00  0.00
ATOM   1430  CD2 LEU A 141      58.320  25.190  44.000  1.00  0.00
ATOM   1431  C   LEU A 141      55.150  26.350  41.560  1.00  0.00
ATOM   1432  O   LEU A 141      54.120  26.770  42.090  1.00  0.00
ATOM   1433  N   ALA A 142      55.150  25.280  40.770  1.00  0.00
ATOM   1434  H   ALA A 142      56.030  24.830  40.630  1.00  0.00
ATOM   1435  CA  ALA A 142      54.020  24.700  40.020  1.00  0.00
ATOM   1436  CB  ALA A 142      54.480  24.030  38.730  1.00  0.00
ATOM   1437  C   ALA A 142      52.990  23.810  40.720  1.00  0.00
ATOM   1438  O   ALA A 142      52.340  22.960  40.120  1.00  0.00
ATOM   1439  N   ILE A 143      52.630  24.300  41.900  1.00  0.00
ATOM   1440  H   ILE A 143      53.120  25.040  42.350  1.00  0.00
ATOM   1441  CA  ILE A 143      51.490  23.790  42.680  1.00  0.00
ATOM   1442  CB  ILE A 143      51.420  24.390  44.090  1.00  0.00
ATOM   1443  CG1 ILE A 143      52.810  24.600  44.700  1.00  0.00
ATOM   1444  CG2 ILE A 143      50.540  23.460  44.920  1.00  0.00
ATOM   1445  CD  ILE A 143      52.970  25.080  46.140  1.00  0.00
ATOM   1446  C   ILE A 143      50.150  23.990  41.980  1.00  0.00
ATOM   1447  O   ILE A 143      49.860  25.090  41.520  1.00  0.00
ATOM   1448  N   THR A 144      49.330  22.940  42.010  1.00  0.00
ATOM   1449  H   THR A 144      49.680  22.100  42.410  1.00  0.00
ATOM   1450  CA  THR A 144      47.960  22.850  41.490  1.00  0.00
ATOM   1451  CB  THR A 144      47.280  21.510  41.780  1.00  0.00
ATOM   1452  OG1 THR A 144      47.370  21.050  43.130  1.00  0.00
ATOM   1453  HG1 THR A 144      46.870  21.800  43.550  1.00  0.00
ATOM   1454  CG2 THR A 144      47.570  20.480  40.680  1.00  0.00
ATOM   1455  C   THR A 144      47.010  23.920  42.040  1.00  0.00
ATOM   1456  O   THR A 144      46.370  23.740  43.080  1.00  0.00
ATOM   1457  N   ARG A 145      46.650  24.880  41.200  1.00  0.00
ATOM   1458  H   ARG A 145      46.740  24.680  40.230  1.00  0.00
ATOM   1459  CA  ARG A 145      45.990  26.130  41.620  1.00  0.00
ATOM   1460  CB  ARG A 145      46.860  27.280  41.120  1.00  0.00
ATOM   1461  CG  ARG A 145      47.930  27.620  42.170  1.00  0.00
ATOM   1462  CD  ARG A 145      48.550  28.970  41.820  1.00  0.00
ATOM   1463  NE  ARG A 145      49.020  28.980  40.430  1.00  0.00
ATOM   1464  HE  ARG A 145      49.260  28.080  40.060  1.00  0.00
ATOM   1465  CZ  ARG A 145      49.140  30.030  39.610  1.00  0.00
ATOM   1466  NH1 ARG A 145      48.910  31.260  40.090  1.00  0.00
ATOM   1467 HH11 ARG A 145      49.130  31.950  39.410  1.00  0.00
ATOM   1468 HH12 ARG A 145      48.610  31.390  41.040  1.00  0.00
ATOM   1469  NH2 ARG A 145      49.690  29.870  38.400  1.00  0.00
ATOM   1470 HH21 ARG A 145      49.840  30.740  37.930  1.00  0.00
ATOM   1471 HH22 ARG A 145      49.820  28.980  37.960  1.00  0.00
ATOM   1472  C   ARG A 145      44.560  26.120  41.080  1.00  0.00
ATOM   1473  O   ARG A 145      44.380  25.400  40.090  1.00  0.00
ATOM   1474  N   PRO A 146      43.520  26.540  41.790  1.00  0.00
ATOM   1475  CA  PRO A 146      43.620  26.550  43.260  1.00  0.00
ATOM   1476  CB  PRO A 146      42.960  27.870  43.680  1.00  0.00
ATOM   1477  CG  PRO A 146      41.930  28.050  42.560  1.00  0.00
ATOM   1478  CD  PRO A 146      42.600  27.560  41.270  1.00  0.00
ATOM   1479  C   PRO A 146      42.940  25.290  43.800  1.00  0.00
ATOM   1480  O   PRO A 146      41.890  25.310  44.450  1.00  0.00
ATOM   1481  N   LEU A 147      43.750  24.240  43.810  1.00  0.00
ATOM   1482  H   LEU A 147      44.740  24.270  43.650  1.00  0.00
ATOM   1483  CA  LEU A 147      43.320  22.920  44.290  1.00  0.00
ATOM   1484  CB  LEU A 147      43.200  21.770  43.280  1.00  0.00
ATOM   1485  CG  LEU A 147      42.050  21.950  42.300  1.00  0.00
ATOM   1486  CD1 LEU A 147      42.040  20.960  41.140  1.00  0.00
ATOM   1487  CD2 LEU A 147      40.710  22.200  43.000  1.00  0.00
ATOM   1488  C   LEU A 147      44.220  22.490  45.450  1.00  0.00
ATOM   1489  O   LEU A 147      45.430  22.710  45.420  1.00  0.00
ATOM   1490  N   ALA A 148      43.760  21.730  46.440  1.00  0.00
ATOM   1491  H   ALA A 148      42.760  21.670  46.530  1.00  0.00
ATOM   1492  CA  ALA A 148      44.520  21.310  47.630  1.00  0.00
ATOM   1493  CB  ALA A 148      43.630  21.030  48.840  1.00  0.00
ATOM   1494  C   ALA A 148      45.440  20.130  47.310  1.00  0.00
ATOM   1495  O   ALA A 148      44.950  19.030  47.040  1.00  0.00
ATOM   1496  N   LEU A 149      46.650  20.530  46.960  1.00  0.00
ATOM   1497  H   LEU A 149      46.760  21.440  46.540  1.00  0.00
ATOM   1498  CA  LEU A 149      47.810  19.680  46.660  1.00  0.00
ATOM   1499  CB  LEU A 149      48.490  19.120  47.910  1.00  0.00
ATOM   1500  CG  LEU A 149      49.030  20.200  48.840  1.00  0.00
ATOM   1501  CD1 LEU A 149      49.280  19.430  50.140  1.00  0.00
ATOM   1502  CD2 LEU A 149      50.290  20.830  48.230  1.00  0.00
ATOM   1503  C   LEU A 149      47.800  18.550  45.620  1.00  0.00
ATOM   1504  O   LEU A 149      48.660  18.500  44.750  1.00  0.00
ATOM   1505  N   LYS A 150      46.930  17.550  45.810  1.00  0.00
ATOM   1506  H   LYS A 150      46.210  17.710  46.480  1.00  0.00
ATOM   1507  CA  LYS A 150      46.570  16.460  44.890  1.00  0.00
ATOM   1508  CB  LYS A 150      45.720  15.370  45.530  1.00  0.00
ATOM   1509  CG  LYS A 150      45.090  14.210  44.760  1.00  0.00
ATOM   1510  CD  LYS A 150      46.030  13.160  44.160  1.00  0.00
ATOM   1511  CE  LYS A 150      45.280  12.170  43.260  1.00  0.00
ATOM   1512  NZ  LYS A 150      44.760  12.700  42.000  1.00  0.00
ATOM   1513  HZ1 LYS A 150      45.550  13.050  41.490  1.00  0.00
ATOM   1514  HZ2 LYS A 150      44.040  13.380  42.120  1.00  0.00
ATOM   1515  HZ3 LYS A 150      44.330  11.970  41.470  1.00  0.00
ATOM   1516  C   LYS A 150      45.830  16.970  43.660  1.00  0.00
ATOM   1517  O   LYS A 150      44.760  17.580  43.750  1.00  0.00
ATOM   1518  N   SER A 151      46.400  16.620  42.510  1.00  0.00
ATOM   1519  H   SER A 151      47.390  16.460  42.530  1.00  0.00
ATOM   1520  CA  SER A 151      45.860  16.850  41.160  1.00  0.00
ATOM   1521  CB  SER A 151      46.550  16.070  40.040  1.00  0.00
ATOM   1522  OG  SER A 151      46.360  14.680  40.310  1.00  0.00
ATOM   1523  HG  SER A 151      47.090  14.460  40.950  1.00  0.00
ATOM   1524  C   SER A 151      44.380  16.530  40.940  1.00  0.00
ATOM   1525  O   SER A 151      43.850  15.630  41.590  1.00  0.00
ATOM   1526  N   ASN A 152      43.780  17.380  40.110  1.00  0.00
ATOM   1527  H   ASN A 152      44.190  18.180  39.670  1.00  0.00
ATOM   1528  CA  ASN A 152      42.360  17.330  39.720  1.00  0.00
ATOM   1529  CB  ASN A 152      42.100  16.220  38.710  1.00  0.00
ATOM   1530  CG  ASN A 152      42.330  16.560  37.240  1.00  0.00
ATOM   1531  OD1 ASN A 152      43.290  17.290  36.970  1.00  0.00
ATOM   1532  ND2 ASN A 152      41.530  16.030  36.320  1.00  0.00
ATOM   1533 HD21 ASN A 152      40.870  15.300  36.510  1.00  0.00
ATOM   1534 HD22 ASN A 152      41.680  16.250  35.350  1.00  0.00
ATOM   1535  C   ASN A 152      41.240  17.470  40.750  1.00  0.00
ATOM   1536  O   ASN A 152      40.090  17.860  40.550  1.00  0.00
ATOM   1537  N   SER A 153      41.500  16.880  41.920  1.00  0.00
ATOM   1538  H   SER A 153      42.470  16.790  42.160  1.00  0.00
ATOM   1539  CA  SER A 153      40.560  16.570  43.000  1.00  0.00
ATOM   1540  CB  SER A 153      41.240  15.810  44.150  1.00  0.00
ATOM   1541  OG  SER A 153      40.370  15.630  45.270  1.00  0.00
ATOM   1542  HG  SER A 153      40.810  15.400  46.130  1.00  0.00
ATOM   1543  C   SER A 153      40.000  17.870  43.580  1.00  0.00
ATOM   1544  O   SER A 153      40.670  18.580  44.330  1.00  0.00
ATOM   1545  N   LYS A 154      38.690  17.960  43.360  1.00  0.00
ATOM   1546  H   LYS A 154      38.160  17.400  42.730  1.00  0.00
ATOM   1547  CA  LYS A 154      37.960  19.120  43.890  1.00  0.00
ATOM   1548  CB  LYS A 154      36.960  19.760  42.920  1.00  0.00
ATOM   1549  CG  LYS A 154      37.500  20.410  41.650  1.00  0.00
ATOM   1550  CD  LYS A 154      36.440  21.320  41.040  1.00  0.00
ATOM   1551  CE  LYS A 154      36.900  21.830  39.670  1.00  0.00
ATOM   1552  NZ  LYS A 154      36.720  20.910  38.550  1.00  0.00
ATOM   1553  HZ1 LYS A 154      37.150  21.370  37.770  1.00  0.00
ATOM   1554  HZ2 LYS A 154      37.290  20.090  38.590  1.00  0.00
ATOM   1555  HZ3 LYS A 154      35.750  20.720  38.380  1.00  0.00
ATOM   1556  C   LYS A 154      37.250  18.990  45.250  1.00  0.00
ATOM   1557  O   LYS A 154      37.590  19.760  46.140  1.00  0.00
ATOM   1558  N   VAL A 155      36.340  18.030  45.380  1.00  0.00
ATOM   1559  H   VAL A 155      36.030  17.380  44.690  1.00  0.00
ATOM   1560  CA  VAL A 155      35.660  17.930  46.680  1.00  0.00
ATOM   1561  CB  VAL A 155      34.130  17.970  46.580  1.00  0.00
ATOM   1562  CG1 VAL A 155      33.490  16.790  45.840  1.00  0.00
ATOM   1563  CG2 VAL A 155      33.520  17.920  47.980  1.00  0.00
ATOM   1564  C   VAL A 155      36.180  16.750  47.500  1.00  0.00
ATOM   1565  O   VAL A 155      35.870  15.580  47.270  1.00  0.00
ATOM   1566  N   GLY A 156      37.080  17.070  48.430  1.00  0.00
ATOM   1567  H   GLY A 156      37.220  18.050  48.570  1.00  0.00
ATOM   1568  CA  GLY A 156      37.520  16.090  49.440  1.00  0.00
ATOM   1569  C   GLY A 156      38.500  16.600  50.500  1.00  0.00
ATOM   1570  O   GLY A 156      38.180  16.800  51.670  1.00  0.00
ATOM   1571  N   GLN A 157      39.600  17.190  50.020  1.00  0.00
ATOM   1572  H   GLN A 157      40.010  17.010  49.130  1.00  0.00
ATOM   1573  CA  GLN A 157      40.630  17.650  50.950  1.00  0.00
ATOM   1574  CB  GLN A 157      41.900  18.080  50.210  1.00  0.00
ATOM   1575  CG  GLN A 157      42.750  17.120  49.370  1.00  0.00
ATOM   1576  CD  GLN A 157      42.050  16.870  48.030  1.00  0.00
ATOM   1577  OE1 GLN A 157      41.240  15.960  47.880  1.00  0.00
ATOM   1578  NE2 GLN A 157      42.000  17.750  47.030  1.00  0.00
ATOM   1579 HE21 GLN A 157      42.640  18.520  47.000  1.00  0.00
ATOM   1580 HE22 GLN A 157      41.370  17.690  46.260  1.00  0.00
ATOM   1581  C   GLN A 157      40.270  18.680  52.030  1.00  0.00
ATOM   1582  O   GLN A 157      40.940  18.840  53.050  1.00  0.00
ATOM   1583  N   SER A 158      39.470  19.660  51.630  1.00  0.00
ATOM   1584  H   SER A 158      39.350  19.730  50.640  1.00  0.00
ATOM   1585  CA  SER A 158      38.930  20.740  52.470  1.00  0.00
ATOM   1586  CB  SER A 158      38.380  21.980  51.760  1.00  0.00
ATOM   1587  OG  SER A 158      37.480  21.510  50.750  1.00  0.00
ATOM   1588  HG  SER A 158      37.220  22.300  50.190  1.00  0.00
ATOM   1589  C   SER A 158      37.900  20.230  53.480  1.00  0.00
ATOM   1590  O   SER A 158      38.120  20.400  54.680  1.00  0.00
ATOM   1591  N   MET A 159      36.890  19.540  52.960  1.00  0.00
ATOM   1592  H   MET A 159      36.570  19.890  52.070  1.00  0.00
ATOM   1593  CA  MET A 159      35.900  18.870  53.810  1.00  0.00
ATOM   1594  CB  MET A 159      35.100  17.950  52.880  1.00  0.00
ATOM   1595  CG  MET A 159      33.940  18.590  52.120  1.00  0.00
ATOM   1596  SD  MET A 159      34.490  20.040  51.160  1.00  0.00
ATOM   1597  CE  MET A 159      32.890  20.500  50.540  1.00  0.00
ATOM   1598  C   MET A 159      36.690  18.000  54.790  1.00  0.00
ATOM   1599  O   MET A 159      36.300  17.970  55.960  1.00  0.00
ATOM   1600  N   VAL A 160      37.660  17.210  54.340  1.00  0.00
ATOM   1601  H   VAL A 160      37.700  17.010  53.360  1.00  0.00
ATOM   1602  CA  VAL A 160      38.500  16.340  55.180  1.00  0.00
ATOM   1603  CB  VAL A 160      39.480  15.480  54.390  1.00  0.00
ATOM   1604  CG1 VAL A 160      40.330  14.540  55.250  1.00  0.00
ATOM   1605  CG2 VAL A 160      38.670  14.510  53.520  1.00  0.00
ATOM   1606  C   VAL A 160      39.200  17.110  56.300  1.00  0.00
ATOM   1607  O   VAL A 160      38.750  17.040  57.450  1.00  0.00
ATOM   1608  N   GLY A 161      40.010  18.060  55.840  1.00  0.00
ATOM   1609  H   GLY A 161      40.260  18.110  54.880  1.00  0.00
ATOM   1610  CA  GLY A 161      40.790  18.980  56.680  1.00  0.00
ATOM   1611  C   GLY A 161      40.040  19.640  57.840  1.00  0.00
ATOM   1612  O   GLY A 161      40.660  19.750  58.890  1.00  0.00
ATOM   1613  N   LEU A 162      38.940  20.320  57.550  1.00  0.00
ATOM   1614  H   LEU A 162      38.690  20.400  56.590  1.00  0.00
ATOM   1615  CA  LEU A 162      37.970  20.930  58.480  1.00  0.00
ATOM   1616  CB  LEU A 162      36.820  21.550  57.680  1.00  0.00
ATOM   1617  CG  LEU A 162      37.060  22.910  57.040  1.00  0.00
ATOM   1618  CD1 LEU A 162      36.490  22.980  55.620  1.00  0.00
ATOM   1619  CD2 LEU A 162      36.620  23.950  58.080  1.00  0.00
ATOM   1620  C   LEU A 162      37.480  20.040  59.620  1.00  0.00
ATOM   1621  O   LEU A 162      37.660  20.320  60.810  1.00  0.00
ATOM   1622  N   ALA A 163      37.250  18.780  59.260  1.00  0.00
ATOM   1623  H   ALA A 163      37.420  18.450  58.330  1.00  0.00
ATOM   1624  CA  ALA A 163      36.880  17.740  60.220  1.00  0.00
ATOM   1625  CB  ALA A 163      36.190  16.540  59.580  1.00  0.00
ATOM   1626  C   ALA A 163      38.020  17.250  61.130  1.00  0.00
ATOM   1627  O   ALA A 163      37.710  17.330  62.320  1.00  0.00
ATOM   1628  N   TRP A 164      39.260  17.300  60.640  1.00  0.00
ATOM   1629  H   TRP A 164      39.390  17.390  59.660  1.00  0.00
ATOM   1630  CA  TRP A 164      40.430  16.870  61.420  1.00  0.00
ATOM   1631  CB  TRP A 164      41.630  16.900  60.460  1.00  0.00
ATOM   1632  CG  TRP A 164      42.930  16.190  60.830  1.00  0.00
ATOM   1633  CD1 TRP A 164      43.600  16.420  61.960  1.00  0.00
ATOM   1634  HD1 TRP A 164      43.610  17.370  62.480  1.00  0.00
ATOM   1635  CD2 TRP A 164      43.310  14.910  60.460  1.00  0.00
ATOM   1636  NE1 TRP A 164      44.190  15.320  62.430  1.00  0.00
ATOM   1637  HE1 TRP A 164      44.540  15.180  63.350  1.00  0.00
ATOM   1638  CE2 TRP A 164      44.080  14.390  61.490  1.00  0.00
ATOM   1639  CE3 TRP A 164      43.130  14.210  59.270  1.00  0.00
ATOM   1640  HE3 TRP A 164      42.830  14.820  58.420  1.00  0.00
ATOM   1641  CZ2 TRP A 164      44.590  13.100  61.320  1.00  0.00
ATOM   1642  HZ2 TRP A 164      45.190  12.660  62.110  1.00  0.00
ATOM   1643  CZ3 TRP A 164      43.680  12.940  59.140  1.00  0.00
ATOM   1644  HZ3 TRP A 164      43.660  12.410  58.190  1.00  0.00
ATOM   1645  CH2 TRP A 164      44.450  12.360  60.150  1.00  0.00
ATOM   1646  HH2 TRP A 164      44.970  11.410  60.030  1.00  0.00
ATOM   1647  C   TRP A 164      40.600  17.780  62.630  1.00  0.00
ATOM   1648  O   TRP A 164      40.740  17.370  63.780  1.00  0.00
ATOM   1649  N   ILE A 165      40.410  19.070  62.390  1.00  0.00
ATOM   1650  H   ILE A 165      40.310  19.330  61.430  1.00  0.00
ATOM   1651  CA  ILE A 165      40.530  20.120  63.410  1.00  0.00
ATOM   1652  CB  ILE A 165      40.560  21.550  62.860  1.00  0.00
ATOM   1653  CG1 ILE A 165      41.200  21.670  61.470  1.00  0.00
ATOM   1654  CG2 ILE A 165      41.160  22.470  63.930  1.00  0.00
ATOM   1655  CD  ILE A 165      40.900  23.050  60.900  1.00  0.00
ATOM   1656  C   ILE A 165      39.500  20.020  64.530  1.00  0.00
ATOM   1657  O   ILE A 165      39.910  19.980  65.690  1.00  0.00
ATOM   1658  N   LEU A 166      38.210  20.040  64.190  1.00  0.00
ATOM   1659  H   LEU A 166      37.920  20.000  63.240  1.00  0.00
ATOM   1660  CA  LEU A 166      37.040  20.010  65.080  1.00  0.00
ATOM   1661  CB  LEU A 166      35.770  20.070  64.230  1.00  0.00
ATOM   1662  CG  LEU A 166      35.380  21.390  63.560  1.00  0.00
ATOM   1663  CD1 LEU A 166      34.400  21.250  62.390  1.00  0.00
ATOM   1664  CD2 LEU A 166      34.900  22.510  64.480  1.00  0.00
ATOM   1665  C   LEU A 166      36.940  18.840  66.070  1.00  0.00
ATOM   1666  O   LEU A 166      36.890  19.030  67.280  1.00  0.00
ATOM   1667  N   SER A 167      37.400  17.710  65.550  1.00  0.00
ATOM   1668  H   SER A 167      37.460  17.570  64.560  1.00  0.00
ATOM   1669  CA  SER A 167      37.630  16.500  66.350  1.00  0.00
ATOM   1670  CB  SER A 167      37.590  15.220  65.510  1.00  0.00
ATOM   1671  OG  SER A 167      38.760  15.270  64.690  1.00  0.00
ATOM   1672  HG  SER A 167      38.400  15.300  63.760  1.00  0.00
ATOM   1673  C   SER A 167      38.760  16.490  67.380  1.00  0.00
ATOM   1674  O   SER A 167      38.510  16.410  68.590  1.00  0.00
ATOM   1675  N   SER A 168      39.940  16.830  66.880  1.00  0.00
ATOM   1676  H   SER A 168      40.080  16.720  65.890  1.00  0.00
ATOM   1677  CA  SER A 168      41.150  17.110  67.660  1.00  0.00
ATOM   1678  CB  SER A 168      42.210  17.680  66.720  1.00  0.00
ATOM   1679  OG  SER A 168      42.600  16.740  65.710  1.00  0.00
ATOM   1680  HG  SER A 168      41.930  16.620  64.980  1.00  0.00
ATOM   1681  C   SER A 168      40.770  18.150  68.720  1.00  0.00
ATOM   1682  O   SER A 168      41.120  17.970  69.880  1.00  0.00
ATOM   1683  N   VAL A 169      40.050  19.200  68.340  1.00  0.00
ATOM   1684  H   VAL A 169      39.650  19.370  67.440  1.00  0.00
ATOM   1685  CA  VAL A 169      39.820  20.240  69.360  1.00  0.00
ATOM   1686  CB  VAL A 169      39.840  21.680  68.840  1.00  0.00
ATOM   1687  CG1 VAL A 169      41.080  22.080  68.040  1.00  0.00
ATOM   1688  CG2 VAL A 169      38.650  21.900  67.900  1.00  0.00
ATOM   1689  C   VAL A 169      38.730  20.090  70.420  1.00  0.00
ATOM   1690  O   VAL A 169      38.990  20.490  71.550  1.00  0.00
ATOM   1691  N   PHE A 170      37.680  19.360  70.070  1.00  0.00
ATOM   1692  H   PHE A 170      37.380  19.240  69.120  1.00  0.00
ATOM   1693  CA  PHE A 170      36.810  18.710  71.060  1.00  0.00
ATOM   1694  CB  PHE A 170      35.760  17.840  70.360  1.00  0.00
ATOM   1695  CG  PHE A 170      34.480  17.530  71.140  1.00  0.00
ATOM   1696  CD1 PHE A 170      34.350  16.290  71.760  1.00  0.00
ATOM   1697  HD1 PHE A 170      35.150  15.570  71.560  1.00  0.00
ATOM   1698  CD2 PHE A 170      33.440  18.430  71.290  1.00  0.00
ATOM   1699  HD2 PHE A 170      33.650  19.450  70.980  1.00  0.00
ATOM   1700  CE1 PHE A 170      33.210  15.940  72.480  1.00  0.00
ATOM   1701  HE1 PHE A 170      33.090  14.920  72.820  1.00  0.00
ATOM   1702  CE2 PHE A 170      32.290  18.160  72.030  1.00  0.00
ATOM   1703  HE2 PHE A 170      31.710  19.000  72.430  1.00  0.00
ATOM   1704  CZ  PHE A 170      32.210  16.900  72.600  1.00  0.00
ATOM   1705  HZ  PHE A 170      31.320  16.590  73.160  1.00  0.00
ATOM   1706  C   PHE A 170      37.470  17.740  72.040  1.00  0.00
ATOM   1707  O   PHE A 170      37.260  17.850  73.250  1.00  0.00
ATOM   1708  N   ALA A 171      38.310  16.860  71.500  1.00  0.00
ATOM   1709  H   ALA A 171      38.260  16.650  70.530  1.00  0.00
ATOM   1710  CA  ALA A 171      39.250  16.080  72.330  1.00  0.00
ATOM   1711  CB  ALA A 171      40.180  15.180  71.520  1.00  0.00
ATOM   1712  C   ALA A 171      40.110  16.870  73.310  1.00  0.00
ATOM   1713  O   ALA A 171      40.200  16.490  74.480  1.00  0.00
ATOM   1714  N   GLY A 172      40.620  18.040  72.930  1.00  0.00
ATOM   1715  H   GLY A 172      40.390  18.440  72.040  1.00  0.00
ATOM   1716  CA  GLY A 172      41.330  19.040  73.740  1.00  0.00
ATOM   1717  C   GLY A 172      40.930  19.200  75.210  1.00  0.00
ATOM   1718  O   GLY A 172      41.770  18.750  75.990  1.00  0.00
ATOM   1719  N   PRO A 173      39.780  19.800  75.490  1.00  0.00
ATOM   1720  CA  PRO A 173      39.200  19.700  76.840  1.00  0.00
ATOM   1721  CB  PRO A 173      37.890  20.480  76.760  1.00  0.00
ATOM   1722  CG  PRO A 173      38.350  21.650  75.890  1.00  0.00
ATOM   1723  CD  PRO A 173      39.210  20.980  74.820  1.00  0.00
ATOM   1724  C   PRO A 173      38.870  18.280  77.290  1.00  0.00
ATOM   1725  O   PRO A 173      39.180  17.970  78.440  1.00  0.00
ATOM   1726  N   GLN A 174      38.160  17.510  76.460  1.00  0.00
ATOM   1727  H   GLN A 174      37.970  17.720  75.500  1.00  0.00
ATOM   1728  CA  GLN A 174      37.620  16.260  77.010  1.00  0.00
ATOM   1729  CB  GLN A 174      36.590  15.660  76.050  1.00  0.00
ATOM   1730  CG  GLN A 174      35.360  16.550  75.840  1.00  0.00
ATOM   1731  CD  GLN A 174      34.400  16.400  77.030  1.00  0.00
ATOM   1732  OE1 GLN A 174      34.400  15.450  77.810  1.00  0.00
ATOM   1733  NE2 GLN A 174      33.410  17.270  77.180  1.00  0.00
ATOM   1734 HE21 GLN A 174      33.360  17.980  76.470  1.00  0.00
ATOM   1735 HE22 GLN A 174      32.950  17.350  78.060  1.00  0.00
ATOM   1736  C   GLN A 174      38.630  15.290  77.620  1.00  0.00
ATOM   1737  O   GLN A 174      38.490  14.860  78.770  1.00  0.00
ATOM   1738  N   LEU A 175      39.730  15.130  76.890  1.00  0.00
ATOM   1739  H   LEU A 175      39.920  15.490  75.980  1.00  0.00
ATOM   1740  CA  LEU A 175      40.850  14.290  77.340  1.00  0.00
ATOM   1741  CB  LEU A 175      41.840  14.160  76.180  1.00  0.00
ATOM   1742  CG  LEU A 175      41.310  13.450  74.930  1.00  0.00
ATOM   1743  CD1 LEU A 175      42.470  13.250  73.960  1.00  0.00
ATOM   1744  CD2 LEU A 175      40.500  12.160  75.090  1.00  0.00
ATOM   1745  C   LEU A 175      41.640  14.840  78.530  1.00  0.00
ATOM   1746  O   LEU A 175      42.230  14.030  79.240  1.00  0.00
ATOM   1747  N   TYR A 176      41.720  16.170  78.550  1.00  0.00
ATOM   1748  H   TYR A 176      41.350  16.680  77.770  1.00  0.00
ATOM   1749  CA  TYR A 176      42.090  16.990  79.720  1.00  0.00
ATOM   1750  CB  TYR A 176      42.250  18.470  79.380  1.00  0.00
ATOM   1751  CG  TYR A 176      43.220  19.150  80.350  1.00  0.00
ATOM   1752  CD1 TYR A 176      44.600  19.050  80.190  1.00  0.00
ATOM   1753  HD1 TYR A 176      44.930  18.200  79.600  1.00  0.00
ATOM   1754  CD2 TYR A 176      42.740  20.110  81.230  1.00  0.00
ATOM   1755  HD2 TYR A 176      41.700  20.090  81.550  1.00  0.00
ATOM   1756  CE1 TYR A 176      45.500  19.930  80.790  1.00  0.00
ATOM   1757  HE1 TYR A 176      46.550  19.940  80.500  1.00  0.00
ATOM   1758  CE2 TYR A 176      43.590  20.970  81.910  1.00  0.00
ATOM   1759  HE2 TYR A 176      43.220  21.610  82.710  1.00  0.00
ATOM   1760  CZ  TYR A 176      44.960  20.880  81.650  1.00  0.00
ATOM   1761  OH  TYR A 176      45.780  21.880  82.050  1.00  0.00
ATOM   1762  HH  TYR A 176      46.740  21.650  81.880  1.00  0.00
ATOM   1763  C   TYR A 176      41.200  16.920  80.960  1.00  0.00
ATOM   1764  O   TYR A 176      41.780  16.670  82.020  1.00  0.00
ATOM   1765  N   ILE A 177      39.870  16.970  80.900  1.00  0.00
ATOM   1766  H   ILE A 177      39.470  17.240  80.020  1.00  0.00
ATOM   1767  CA  ILE A 177      38.890  17.020  81.990  1.00  0.00
ATOM   1768  CB  ILE A 177      37.470  17.230  81.450  1.00  0.00
ATOM   1769  CG1 ILE A 177      37.340  18.650  80.890  1.00  0.00
ATOM   1770  CG2 ILE A 177      36.410  16.940  82.500  1.00  0.00
ATOM   1771  CD  ILE A 177      35.910  19.130  80.590  1.00  0.00
ATOM   1772  C   ILE A 177      38.940  15.740  82.820  1.00  0.00
ATOM   1773  O   ILE A 177      39.100  15.710  84.040  1.00  0.00
ATOM   1774  N   PHE A 178      39.140  14.670  82.060  1.00  0.00
ATOM   1775  H   PHE A 178      39.310  14.770  81.080  1.00  0.00
ATOM   1776  CA  PHE A 178      39.410  13.290  82.500  1.00  0.00
ATOM   1777  CB  PHE A 178      39.350  12.340  81.300  1.00  0.00
ATOM   1778  CG  PHE A 178      37.950  11.750  81.120  1.00  0.00
ATOM   1779  CD1 PHE A 178      37.100  12.050  80.070  1.00  0.00
ATOM   1780  HD1 PHE A 178      37.440  12.750  79.290  1.00  0.00
ATOM   1781  CD2 PHE A 178      37.490  10.770  82.000  1.00  0.00
ATOM   1782  HD2 PHE A 178      38.180  10.310  82.700  1.00  0.00
ATOM   1783  CE1 PHE A 178      35.870  11.430  79.850  1.00  0.00
ATOM   1784  HE1 PHE A 178      35.260  11.880  79.070  1.00  0.00
ATOM   1785  CE2 PHE A 178      36.260  10.150  81.820  1.00  0.00
ATOM   1786  HE2 PHE A 178      36.030   9.170  82.240  1.00  0.00
ATOM   1787  CZ  PHE A 178      35.420  10.500  80.770  1.00  0.00
ATOM   1788  HZ  PHE A 178      34.440  10.050  80.570  1.00  0.00
ATOM   1789  C   PHE A 178      40.710  13.070  83.280  1.00  0.00
ATOM   1790  O   PHE A 178      40.830  11.940  83.760  1.00  0.00
ATOM   1791  N   ARG A 179      41.630  14.020  83.340  1.00  0.00
ATOM   1792  H   ARG A 179      41.450  14.940  82.990  1.00  0.00
ATOM   1793  CA  ARG A 179      42.820  13.820  84.180  1.00  0.00
ATOM   1794  CB  ARG A 179      44.070  13.250  83.500  1.00  0.00
ATOM   1795  CG  ARG A 179      44.900  12.290  84.350  1.00  0.00
ATOM   1796  CD  ARG A 179      44.050  11.110  84.830  1.00  0.00
ATOM   1797  NE  ARG A 179      44.680  10.650  86.070  1.00  0.00
ATOM   1798  HE  ARG A 179      45.660  10.510  85.940  1.00  0.00
ATOM   1799  CZ  ARG A 179      44.130  10.470  87.280  1.00  0.00
ATOM   1800  NH1 ARG A 179      42.810  10.500  87.510  1.00  0.00
ATOM   1801 HH11 ARG A 179      42.130  10.660  86.800  1.00  0.00
ATOM   1802 HH12 ARG A 179      42.440  10.230  88.400  1.00  0.00
ATOM   1803  NH2 ARG A 179      45.040  10.200  88.230  1.00  0.00
ATOM   1804 HH21 ARG A 179      45.990   9.930  88.040  1.00  0.00
ATOM   1805 HH22 ARG A 179      44.810  10.120  89.200  1.00  0.00
ATOM   1806  C   ARG A 179      43.210  15.080  84.970  1.00  0.00
ATOM   1807  O   ARG A 179      43.480  14.810  86.140  1.00  0.00
ATOM   1808  N   MET A 180      43.270  16.240  84.320  1.00  0.00
ATOM   1809  H   MET A 180      43.020  16.260  83.350  1.00  0.00
ATOM   1810  CA  MET A 180      43.410  17.560  84.940  1.00  0.00
ATOM   1811  CB  MET A 180      44.590  18.250  84.250  1.00  0.00
ATOM   1812  CG  MET A 180      45.880  17.700  84.850  1.00  0.00
ATOM   1813  SD  MET A 180      46.380  16.100  84.120  1.00  0.00
ATOM   1814  CE  MET A 180      47.570  16.750  82.960  1.00  0.00
ATOM   1815  C   MET A 180      42.150  18.420  85.030  1.00  0.00
ATOM   1816  O   MET A 180      41.710  19.010  84.050  1.00  0.00
ATOM   1817  N   ILE A 181      41.720  18.670  86.270  1.00  0.00
ATOM   1818  H   ILE A 181      42.290  18.440  87.060  1.00  0.00
ATOM   1819  CA  ILE A 181      40.560  19.510  86.570  1.00  0.00
ATOM   1820  CB  ILE A 181      39.530  18.930  87.550  1.00  0.00
ATOM   1821  CG1 ILE A 181      39.050  17.550  87.090  1.00  0.00
ATOM   1822  CG2 ILE A 181      38.310  19.820  87.730  1.00  0.00
ATOM   1823  CD  ILE A 181      38.120  16.970  88.150  1.00  0.00
ATOM   1824  C   ILE A 181      41.020  20.890  87.040  1.00  0.00
ATOM   1825  O   ILE A 181      41.620  21.030  88.110  1.00  0.00
ATOM   1826  N   HIS A 182      40.620  21.890  86.260  1.00  0.00
ATOM   1827  H   HIS A 182      39.940  21.690  85.550  1.00  0.00
ATOM   1828  CA  HIS A 182      40.770  23.330  86.510  1.00  0.00
ATOM   1829  CB  HIS A 182      41.630  24.070  85.480  1.00  0.00
ATOM   1830  CG  HIS A 182      43.110  23.650  85.470  1.00  0.00
ATOM   1831  ND1 HIS A 182      44.070  24.430  85.950  1.00  0.00
ATOM   1832  CD2 HIS A 182      43.640  22.630  84.810  1.00  0.00
ATOM   1833  HD2 HIS A 182      43.600  21.630  85.240  1.00  0.00
ATOM   1834  CE1 HIS A 182      45.150  23.690  85.740  1.00  0.00
ATOM   1835  HE1 HIS A 182      46.030  23.840  86.370  1.00  0.00
ATOM   1836  NE2 HIS A 182      44.880  23.050  84.610  1.00  0.00
ATOM   1837  HE2 HIS A 182      45.460  22.770  83.840  1.00  0.00
ATOM   1838  C   HIS A 182      39.450  24.050  86.760  1.00  0.00
ATOM   1839  O   HIS A 182      38.600  24.130  85.870  1.00  0.00
ATOM   1840  N   LEU A 183      39.350  24.390  88.040  1.00  0.00
ATOM   1841  H   LEU A 183      39.730  23.850  88.790  1.00  0.00
ATOM   1842  CA  LEU A 183      38.370  25.350  88.560  1.00  0.00
ATOM   1843  CB  LEU A 183      37.160  24.510  88.970  1.00  0.00
ATOM   1844  CG  LEU A 183      35.830  25.280  89.030  1.00  0.00
ATOM   1845  CD1 LEU A 183      35.390  25.610  87.600  1.00  0.00
ATOM   1846  CD2 LEU A 183      34.660  24.670  89.790  1.00  0.00
ATOM   1847  C   LEU A 183      39.070  25.980  89.770  1.00  0.00
ATOM   1848  O   LEU A 183      39.810  25.330  90.500  1.00  0.00
ATOM   1849  N   ALA A 184      39.160  27.310  89.770  1.00  0.00
ATOM   1850  H   ALA A 184      38.800  27.900  89.050  1.00  0.00
ATOM   1851  CA  ALA A 184      40.020  27.940  90.780  1.00  0.00
ATOM   1852  CB  ALA A 184      40.890  29.050  90.190  1.00  0.00
ATOM   1853  C   ALA A 184      39.420  28.430  92.100  1.00  0.00
ATOM   1854  O   ALA A 184      39.900  28.100  93.190  1.00  0.00
ATOM   1855  N   ASP A 185      38.310  29.160  92.030  1.00  0.00
ATOM   1856  H   ASP A 185      37.800  29.070  91.180  1.00  0.00
ATOM   1857  CA  ASP A 185      37.720  29.960  93.110  1.00  0.00
ATOM   1858  CB  ASP A 185      38.210  31.390  92.860  1.00  0.00
ATOM   1859  CG  ASP A 185      38.070  32.340  94.050  1.00  0.00
ATOM   1860  OD1 ASP A 185      38.950  32.330  94.950  1.00  0.00
ATOM   1861  OD2 ASP A 185      37.030  33.010  94.180  1.00  0.00
ATOM   1862  C   ASP A 185      36.200  29.850  93.000  1.00  0.00
ATOM   1863  O   ASP A 185      35.680  29.160  92.120  1.00  0.00
ATOM   1864  N   SER A 186      35.490  30.700  93.730  1.00  0.00
ATOM   1865  H   SER A 186      35.970  31.450  94.200  1.00  0.00
ATOM   1866  CA  SER A 186      34.030  30.650  93.940  1.00  0.00
ATOM   1867  CB  SER A 186      33.760  31.750  94.960  1.00  0.00
ATOM   1868  OG  SER A 186      32.380  31.830  95.330  1.00  0.00
ATOM   1869  HG  SER A 186      32.140  31.090  95.960  1.00  0.00
ATOM   1870  C   SER A 186      33.220  30.960  92.680  1.00  0.00
ATOM   1871  O   SER A 186      33.650  31.530  91.680  1.00  0.00
ATOM   1872  N   SER A 187      31.980  30.470  92.740  1.00  0.00
ATOM   1873  H   SER A 187      31.680  30.010  93.570  1.00  0.00
ATOM   1874  CA  SER A 187      31.060  30.600  91.600  1.00  0.00
ATOM   1875  CB  SER A 187      29.710  30.000  92.010  1.00  0.00
ATOM   1876  OG  SER A 187      29.850  28.610  92.280  1.00  0.00
ATOM   1877  HG  SER A 187      30.420  28.430  93.090  1.00  0.00
ATOM   1878  C   SER A 187      30.740  32.030  91.170  1.00  0.00
ATOM   1879  O   SER A 187      30.510  32.870  92.030  1.00  0.00
ATOM   1880  N   GLY A 188      30.130  32.080  89.980  1.00  0.00
ATOM   1881  H   GLY A 188      29.840  31.230  89.540  1.00  0.00
ATOM   1882  CA  GLY A 188      29.540  33.300  89.420  1.00  0.00
ATOM   1883  C   GLY A 188      28.410  34.060  90.120  1.00  0.00
ATOM   1884  O   GLY A 188      27.660  33.490  90.900  1.00  0.00
ATOM   1885  N   GLN A 189      28.310  35.360  89.850  1.00  0.00
ATOM   1886  H   GLN A 189      27.450  35.820  90.050  1.00  0.00
ATOM   1887  CA  GLN A 189      29.340  36.230  89.270  1.00  0.00
ATOM   1888  CB  GLN A 189      28.770  37.560  88.770  1.00  0.00
ATOM   1889  CG  GLN A 189      29.630  38.200  87.670  1.00  0.00
ATOM   1890  CD  GLN A 189      29.260  37.710  86.270  1.00  0.00
ATOM   1891  OE1 GLN A 189      28.260  37.070  85.950  1.00  0.00
ATOM   1892  NE2 GLN A 189      30.130  38.020  85.310  1.00  0.00
ATOM   1893 HE21 GLN A 189      31.010  38.500  85.330  1.00  0.00
ATOM   1894 HE22 GLN A 189      29.860  37.690  84.400  1.00  0.00
ATOM   1895  C   GLN A 189      30.420  36.570  90.310  1.00  0.00
ATOM   1896  O   GLN A 189      30.180  37.050  91.410  1.00  0.00
ATOM   1897  N   THR A 190      31.680  36.370  89.960  1.00  0.00
ATOM   1898  H   THR A 190      31.970  36.310  89.000  1.00  0.00
ATOM   1899  CA  THR A 190      32.820  36.750  90.810  1.00  0.00
ATOM   1900  CB  THR A 190      33.570  35.580  91.450  1.00  0.00
ATOM   1901  OG1 THR A 190      34.070  34.660  90.480  1.00  0.00
ATOM   1902  HG1 THR A 190      34.400  33.870  91.000  1.00  0.00
ATOM   1903  CG2 THR A 190      32.820  35.010  92.660  1.00  0.00
ATOM   1904  C   THR A 190      33.820  37.760  90.250  1.00  0.00
ATOM   1905  O   THR A 190      34.030  37.860  89.040  1.00  0.00
ATOM   1906  N   LYS A 191      34.210  38.620  91.190  1.00  0.00
ATOM   1907  H   LYS A 191      34.210  38.510  92.180  1.00  0.00
ATOM   1908  CA  LYS A 191      35.110  39.720  90.800  1.00  0.00
ATOM   1909  CB  LYS A 191      34.540  40.970  91.480  1.00  0.00
ATOM   1910  CG  LYS A 191      35.360  42.140  90.940  1.00  0.00
ATOM   1911  CD  LYS A 191      34.750  43.470  91.410  1.00  0.00
ATOM   1912  CE  LYS A 191      35.350  44.580  90.560  1.00  0.00
ATOM   1913  NZ  LYS A 191      35.350  45.920  91.170  1.00  0.00
ATOM   1914  HZ1 LYS A 191      34.410  46.090  91.450  1.00  0.00
ATOM   1915  HZ2 LYS A 191      35.950  46.120  91.940  1.00  0.00
ATOM   1916  HZ3 LYS A 191      35.590  46.630  90.500  1.00  0.00
ATOM   1917  C   LYS A 191      36.580  39.370  91.020  1.00  0.00
ATOM   1918  O   LYS A 191      37.210  39.410  92.070  1.00  0.00
ATOM   1919  N   VAL A 192      37.050  38.830  89.890  1.00  0.00
ATOM   1920  H   VAL A 192      36.400  38.600  89.170  1.00  0.00
ATOM   1921  CA  VAL A 192      38.420  38.360  89.650  1.00  0.00
ATOM   1922  CB  VAL A 192      38.440  36.830  89.630  1.00  0.00
ATOM   1923  CG1 VAL A 192      37.980  36.370  91.010  1.00  0.00
ATOM   1924  CG2 VAL A 192      37.570  36.220  88.540  1.00  0.00
ATOM   1925  C   VAL A 192      39.450  38.960  88.690  1.00  0.00
ATOM   1926  O   VAL A 192      39.070  39.620  87.720  1.00  0.00
ATOM   1927  N   PHE A 193      40.710  39.060  89.100  1.00  0.00
ATOM   1928  H   PHE A 193      41.070  38.520  89.860  1.00  0.00
ATOM   1929  CA  PHE A 193      41.690  39.930  88.430  1.00  0.00
ATOM   1930  CB  PHE A 193      42.840  40.400  89.320  1.00  0.00
ATOM   1931  CG  PHE A 193      43.040  41.870  88.960  1.00  0.00
ATOM   1932  CD1 PHE A 193      42.950  42.850  89.940  1.00  0.00
ATOM   1933  HD1 PHE A 193      42.300  42.680  90.800  1.00  0.00
ATOM   1934  CD2 PHE A 193      43.800  42.180  87.830  1.00  0.00
ATOM   1935  HD2 PHE A 193      44.080  41.380  87.140  1.00  0.00
ATOM   1936  CE1 PHE A 193      43.860  43.900  89.920  1.00  0.00
ATOM   1937  HE1 PHE A 193      44.080  44.410  90.870  1.00  0.00
ATOM   1938  CE2 PHE A 193      44.500  43.360  87.690  1.00  0.00
ATOM   1939  HE2 PHE A 193      44.930  43.580  86.710  1.00  0.00
ATOM   1940  CZ  PHE A 193      44.620  44.200  88.800  1.00  0.00
ATOM   1941  HZ  PHE A 193      45.250  45.090  88.820  1.00  0.00
ATOM   1942  C   PHE A 193      42.160  39.380  87.080  1.00  0.00
ATOM   1943  O   PHE A 193      42.320  40.150  86.140  1.00  0.00
ATOM   1944  N   SER A 194      42.090  38.070  86.870  1.00  0.00
ATOM   1945  H   SER A 194      41.850  37.470  87.640  1.00  0.00
ATOM   1946  CA  SER A 194      42.540  37.510  85.590  1.00  0.00
ATOM   1947  CB  SER A 194      43.910  36.880  85.820  1.00  0.00
ATOM   1948  OG  SER A 194      43.900  35.700  86.620  1.00  0.00
ATOM   1949  HG  SER A 194      43.410  35.930  87.460  1.00  0.00
ATOM   1950  C   SER A 194      41.510  36.650  84.860  1.00  0.00
ATOM   1951  O   SER A 194      41.030  37.040  83.800  1.00  0.00
ATOM   1952  N   GLN A 195      41.310  35.410  85.310  1.00  0.00
ATOM   1953  H   GLN A 195      41.730  35.000  86.120  1.00  0.00
ATOM   1954  CA  GLN A 195      40.480  34.440  84.580  1.00  0.00
ATOM   1955  CB  GLN A 195      41.150  33.100  84.270  1.00  0.00
ATOM   1956  CG  GLN A 195      42.300  33.180  83.270  1.00  0.00
ATOM   1957  CD  GLN A 195      43.080  31.940  82.830  1.00  0.00
ATOM   1958  OE1 GLN A 195      44.070  31.460  83.380  1.00  0.00
ATOM   1959  NE2 GLN A 195      42.760  31.490  81.620  1.00  0.00
ATOM   1960 HE21 GLN A 195      43.310  30.760  81.210  1.00  0.00
ATOM   1961 HE22 GLN A 195      41.980  31.920  81.170  1.00  0.00
ATOM   1962  C   GLN A 195      39.150  34.130  85.260  1.00  0.00
ATOM   1963  O   GLN A 195      39.050  33.640  86.380  1.00  0.00
ATOM   1964  N   CYS A 196      38.000  34.290  84.610  1.00  0.00
ATOM   1965  H   CYS A 196      37.170  34.230  85.160  1.00  0.00
ATOM   1966  CA  CYS A 196      37.810  34.690  83.200  1.00  0.00
ATOM   1967  CB  CYS A 196      36.880  33.730  82.470  1.00  0.00
ATOM   1968  SG  CYS A 196      36.740  31.980  82.980  1.00  0.00
ATOM   1969  C   CYS A 196      37.100  36.040  83.110  1.00  0.00
ATOM   1970  O   CYS A 196      35.870  36.110  83.110  1.00  0.00
ATOM   1971  N   VAL A 197      37.860  37.120  82.940  1.00  0.00
ATOM   1972  H   VAL A 197      38.860  37.100  83.070  1.00  0.00
ATOM   1973  CA  VAL A 197      37.320  38.470  82.740  1.00  0.00
ATOM   1974  CB  VAL A 197      37.500  39.450  83.900  1.00  0.00
ATOM   1975  CG1 VAL A 197      36.670  39.080  85.130  1.00  0.00
ATOM   1976  CG2 VAL A 197      38.900  39.960  84.240  1.00  0.00
ATOM   1977  C   VAL A 197      37.570  39.200  81.420  1.00  0.00
ATOM   1978  O   VAL A 197      38.720  39.130  81.000  1.00  0.00
ATOM   1979  N   THR A 198      36.650  40.030  80.950  1.00  0.00
ATOM   1980  H   THR A 198      35.750  40.060  81.380  1.00  0.00
ATOM   1981  CA  THR A 198      36.770  40.620  79.610  1.00  0.00
ATOM   1982  CB  THR A 198      35.610  40.380  78.630  1.00  0.00
ATOM   1983  OG1 THR A 198      34.350  40.810  79.140  1.00  0.00
ATOM   1984  HG1 THR A 198      33.700  40.920  78.380  1.00  0.00
ATOM   1985  CG2 THR A 198      35.700  38.880  78.310  1.00  0.00
ATOM   1986  C   THR A 198      36.830  42.150  79.590  1.00  0.00
ATOM   1987  O   THR A 198      37.780  42.680  79.020  1.00  0.00
ATOM   1988  N   HIS A 199      36.160  42.740  80.580  1.00  0.00
ATOM   1989  H   HIS A 199      35.250  42.410  80.840  1.00  0.00
ATOM   1990  CA  HIS A 199      36.330  44.130  81.010  1.00  0.00
ATOM   1991  CB  HIS A 199      35.120  45.020  80.720  1.00  0.00
ATOM   1992  CG  HIS A 199      35.490  46.500  80.690  1.00  0.00
ATOM   1993  ND1 HIS A 199      35.160  47.420  81.600  1.00  0.00
ATOM   1994  CD2 HIS A 199      36.290  47.200  79.890  1.00  0.00
ATOM   1995  HD2 HIS A 199      36.060  47.410  78.850  1.00  0.00
ATOM   1996  CE1 HIS A 199      35.650  48.560  81.120  1.00  0.00
ATOM   1997  HE1 HIS A 199      35.210  49.550  81.240  1.00  0.00
ATOM   1998  NE2 HIS A 199      36.810  48.240  80.540  1.00  0.00
ATOM   1999  HE2 HIS A 199      37.510  48.850  80.170  1.00  0.00
ATOM   2000  C   HIS A 199      36.740  44.170  82.490  1.00  0.00
ATOM   2001  O   HIS A 199      35.910  44.010  83.390  1.00  0.00
ATOM   2002  N   CYS A 200      38.000  44.430  82.810  1.00  0.00
ATOM   2003  H   CYS A 200      38.200  44.340  83.780  1.00  0.00
ATOM   2004  CA  CYS A 200      39.190  44.650  81.970  1.00  0.00
ATOM   2005  CB  CYS A 200      40.170  45.610  82.650  1.00  0.00
ATOM   2006  SG  CYS A 200      39.670  47.320  82.210  1.00  0.00
ATOM   2007  C   CYS A 200      39.890  43.310  81.700  1.00  0.00
ATOM   2008  O   CYS A 200      39.680  42.370  82.470  1.00  0.00
ATOM   2009  N   SER A 201      40.660  43.160  80.630  1.00  0.00
ATOM   2010  H   SER A 201      40.500  43.750  79.840  1.00  0.00
ATOM   2011  CA  SER A 201      41.570  42.030  80.390  1.00  0.00
ATOM   2012  CB  SER A 201      41.910  41.950  78.900  1.00  0.00
ATOM   2013  OG  SER A 201      42.270  43.220  78.360  1.00  0.00
ATOM   2014  HG  SER A 201      43.000  43.050  77.710  1.00  0.00
ATOM   2015  C   SER A 201      42.910  42.190  81.110  1.00  0.00
ATOM   2016  O   SER A 201      43.180  43.300  81.570  1.00  0.00
ATOM   2017  N   PHE A 202      43.490  41.040  81.440  1.00  0.00
ATOM   2018  H   PHE A 202      42.950  40.210  81.310  1.00  0.00
ATOM   2019  CA  PHE A 202      44.840  40.910  81.990  1.00  0.00
ATOM   2020  CB  PHE A 202      44.710  40.900  83.520  1.00  0.00
ATOM   2021  CG  PHE A 202      46.030  41.060  84.270  1.00  0.00
ATOM   2022  CD1 PHE A 202      46.530  40.000  85.010  1.00  0.00
ATOM   2023  HD1 PHE A 202      46.010  39.040  84.970  1.00  0.00
ATOM   2024  CD2 PHE A 202      46.550  42.300  84.630  1.00  0.00
ATOM   2025  HD2 PHE A 202      46.190  43.230  84.190  1.00  0.00
ATOM   2026  CE1 PHE A 202      47.420  40.060  86.080  1.00  0.00
ATOM   2027  HE1 PHE A 202      47.500  39.320  86.880  1.00  0.00
ATOM   2028  CE2 PHE A 202      47.500  42.420  85.640  1.00  0.00
ATOM   2029  HE2 PHE A 202      47.760  43.440  85.940  1.00  0.00
ATOM   2030  CZ  PHE A 202      47.910  41.320  86.380  1.00  0.00
ATOM   2031  HZ  PHE A 202      48.560  41.460  87.240  1.00  0.00
ATOM   2032  C   PHE A 202      45.470  39.620  81.450  1.00  0.00
ATOM   2033  O   PHE A 202      45.000  39.040  80.470  1.00  0.00
ATOM   2034  N   SER A 203      46.590  39.130  81.980  1.00  0.00
ATOM   2035  H   SER A 203      47.060  39.580  82.740  1.00  0.00
ATOM   2036  CA  SER A 203      47.450  38.070  81.460  1.00  0.00
ATOM   2037  CB  SER A 203      48.880  38.330  81.930  1.00  0.00
ATOM   2038  OG  SER A 203      48.950  38.580  83.340  1.00  0.00
ATOM   2039  HG  SER A 203      49.920  38.720  83.500  1.00  0.00
ATOM   2040  C   SER A 203      46.860  36.710  81.840  1.00  0.00
ATOM   2041  O   SER A 203      46.700  36.420  83.020  1.00  0.00
ATOM   2042  N   GLN A 204      46.220  36.160  80.810  1.00  0.00
ATOM   2043  H   GLN A 204      45.780  36.770  80.150  1.00  0.00
ATOM   2044  CA  GLN A 204      45.630  34.820  80.720  1.00  0.00
ATOM   2045  CB  GLN A 204      44.510  34.850  79.670  1.00  0.00
ATOM   2046  CG  GLN A 204      43.290  35.580  80.220  1.00  0.00
ATOM   2047  CD  GLN A 204      42.300  35.880  79.090  1.00  0.00
ATOM   2048  OE1 GLN A 204      42.310  35.310  78.000  1.00  0.00
ATOM   2049  NE2 GLN A 204      41.500  36.940  79.190  1.00  0.00
ATOM   2050 HE21 GLN A 204      41.510  37.570  79.960  1.00  0.00
ATOM   2051 HE22 GLN A 204      41.140  37.340  78.350  1.00  0.00
ATOM   2052  C   GLN A 204      46.760  33.810  80.480  1.00  0.00
ATOM   2053  O   GLN A 204      46.890  33.300  79.370  1.00  0.00
ATOM   2054  N   TRP A 205      47.460  33.460  81.550  1.00  0.00
ATOM   2055  H   TRP A 205      47.180  33.590  82.500  1.00  0.00
ATOM   2056  CA  TRP A 205      48.530  32.450  81.540  1.00  0.00
ATOM   2057  CB  TRP A 205      49.660  33.080  82.370  1.00  0.00
ATOM   2058  CG  TRP A 205      50.970  32.310  82.210  1.00  0.00
ATOM   2059  CD1 TRP A 205      51.660  32.290  81.070  1.00  0.00
ATOM   2060  HD1 TRP A 205      51.230  32.330  80.070  1.00  0.00
ATOM   2061  CD2 TRP A 205      51.800  31.790  83.200  1.00  0.00
ATOM   2062  NE1 TRP A 205      52.880  31.820  81.300  1.00  0.00
ATOM   2063  HE1 TRP A 205      53.530  31.610  80.570  1.00  0.00
ATOM   2064  CE2 TRP A 205      52.990  31.440  82.570  1.00  0.00
ATOM   2065  CE3 TRP A 205      51.550  31.200  84.430  1.00  0.00
ATOM   2066  HE3 TRP A 205      50.550  31.320  84.860  1.00  0.00
ATOM   2067  CZ2 TRP A 205      53.930  30.590  83.140  1.00  0.00
ATOM   2068  HZ2 TRP A 205      54.970  30.680  82.800  1.00  0.00
ATOM   2069  CZ3 TRP A 205      52.460  30.350  85.050  1.00  0.00
ATOM   2070  HZ3 TRP A 205      52.230  30.020  86.060  1.00  0.00
ATOM   2071  CH2 TRP A 205      53.650  30.050  84.380  1.00  0.00
ATOM   2072  HH2 TRP A 205      54.490  29.640  84.940  1.00  0.00
ATOM   2073  C   TRP A 205      48.250  30.990  81.890  1.00  0.00
ATOM   2074  O   TRP A 205      47.470  30.700  82.790  1.00  0.00
ATOM   2075  N   TRP A 206      48.900  30.070  81.170  1.00  0.00
ATOM   2076  H   TRP A 206      49.670  30.380  80.600  1.00  0.00
ATOM   2077  CA  TRP A 206      48.750  28.630  81.400  1.00  0.00
ATOM   2078  CB  TRP A 206      48.450  27.870  80.100  1.00  0.00
ATOM   2079  CG  TRP A 206      48.020  26.420  80.320  1.00  0.00
ATOM   2080  CD1 TRP A 206      48.730  25.350  80.670  1.00  0.00
ATOM   2081  HD1 TRP A 206      49.780  25.460  80.950  1.00  0.00
ATOM   2082  CD2 TRP A 206      46.810  25.880  79.890  1.00  0.00
ATOM   2083  NE1 TRP A 206      48.040  24.220  80.590  1.00  0.00
ATOM   2084  HE1 TRP A 206      48.480  23.320  80.560  1.00  0.00
ATOM   2085  CE2 TRP A 206      46.840  24.510  80.110  1.00  0.00
ATOM   2086  CE3 TRP A 206      45.670  26.420  79.310  1.00  0.00
ATOM   2087  HE3 TRP A 206      45.600  27.480  79.070  1.00  0.00
ATOM   2088  CZ2 TRP A 206      45.820  23.660  79.690  1.00  0.00
ATOM   2089  HZ2 TRP A 206      46.120  22.640  79.440  1.00  0.00
ATOM   2090  CZ3 TRP A 206      44.630  25.590  78.900  1.00  0.00
ATOM   2091  HZ3 TRP A 206      43.670  25.950  78.540  1.00  0.00
ATOM   2092  CH2 TRP A 206      44.680  24.210  79.100  1.00  0.00
ATOM   2093  HH2 TRP A 206      43.870  23.550  78.810  1.00  0.00
ATOM   2094  C   TRP A 206      50.080  28.100  81.930  1.00  0.00
ATOM   2095  O   TRP A 206      51.110  28.030  81.260  1.00  0.00
ATOM   2096  N   HIS A 207      49.880  27.430  83.060  1.00  0.00
ATOM   2097  H   HIS A 207      48.930  27.260  83.330  1.00  0.00
ATOM   2098  CA  HIS A 207      50.890  27.070  84.070  1.00  0.00
ATOM   2099  CB  HIS A 207      50.280  26.380  85.300  1.00  0.00
ATOM   2100  CG  HIS A 207      49.630  25.030  85.000  1.00  0.00
ATOM   2101  ND1 HIS A 207      49.060  24.560  83.890  1.00  0.00
ATOM   2102  CD2 HIS A 207      49.470  24.120  85.950  1.00  0.00
ATOM   2103  HD2 HIS A 207      50.340  23.540  86.280  1.00  0.00
ATOM   2104  CE1 HIS A 207      48.710  23.320  84.220  1.00  0.00
ATOM   2105  HE1 HIS A 207      48.770  22.400  83.650  1.00  0.00
ATOM   2106  NE2 HIS A 207      48.480  23.340  85.530  1.00  0.00
ATOM   2107  HE2 HIS A 207      47.930  22.680  86.050  1.00  0.00
ATOM   2108  C   HIS A 207      52.100  26.270  83.600  1.00  0.00
ATOM   2109  O   HIS A 207      53.230  26.510  84.030  1.00  0.00
ATOM   2110  N   GLN A 208      51.840  25.330  82.700  1.00  0.00
ATOM   2111  H   GLN A 208      50.890  25.010  82.680  1.00  0.00
ATOM   2112  CA  GLN A 208      52.840  24.370  82.210  1.00  0.00
ATOM   2113  CB  GLN A 208      52.860  23.020  82.930  1.00  0.00
ATOM   2114  CG  GLN A 208      53.560  23.110  84.290  1.00  0.00
ATOM   2115  CD  GLN A 208      54.120  21.810  84.870  1.00  0.00
ATOM   2116  OE1 GLN A 208      53.700  21.330  85.920  1.00  0.00
ATOM   2117  NE2 GLN A 208      55.270  21.480  84.300  1.00  0.00
ATOM   2118 HE21 GLN A 208      55.640  22.000  83.530  1.00  0.00
ATOM   2119 HE22 GLN A 208      55.850  20.790  84.730  1.00  0.00
ATOM   2120  C   GLN A 208      52.740  24.160  80.700  1.00  0.00
ATOM   2121  O   GLN A 208      52.150  25.000  80.020  1.00  0.00
ATOM   2122  N   ALA A 209      53.450  23.170  80.180  1.00  0.00
ATOM   2123  H   ALA A 209      54.210  22.830  80.740  1.00  0.00
ATOM   2124  CA  ALA A 209      53.540  22.740  78.770  1.00  0.00
ATOM   2125  CB  ALA A 209      53.540  21.210  78.780  1.00  0.00
ATOM   2126  C   ALA A 209      52.760  23.340  77.610  1.00  0.00
ATOM   2127  O   ALA A 209      53.340  23.690  76.580  1.00  0.00
ATOM   2128  N   PHE A 210      51.440  23.320  77.750  1.00  0.00
ATOM   2129  H   PHE A 210      51.100  23.070  78.650  1.00  0.00
ATOM   2130  CA  PHE A 210      50.530  23.940  76.770  1.00  0.00
ATOM   2131  CB  PHE A 210      49.090  23.890  77.300  1.00  0.00
ATOM   2132  CG  PHE A 210      48.080  24.190  76.190  1.00  0.00
ATOM   2133  CD1 PHE A 210      47.230  25.290  76.350  1.00  0.00
ATOM   2134  HD1 PHE A 210      47.380  26.000  77.150  1.00  0.00
ATOM   2135  CD2 PHE A 210      47.940  23.430  75.030  1.00  0.00
ATOM   2136  HD2 PHE A 210      48.620  22.630  74.730  1.00  0.00
ATOM   2137  CE1 PHE A 210      46.300  25.540  75.350  1.00  0.00
ATOM   2138  HE1 PHE A 210      45.420  26.130  75.590  1.00  0.00
ATOM   2139  CE2 PHE A 210      47.020  23.720  74.030  1.00  0.00
ATOM   2140  HE2 PHE A 210      47.010  23.180  73.080  1.00  0.00
ATOM   2141  CZ  PHE A 210      46.220  24.840  74.150  1.00  0.00
ATOM   2142  HZ  PHE A 210      45.420  25.030  73.430  1.00  0.00
ATOM   2143  C   PHE A 210      50.880  25.390  76.430  1.00  0.00
ATOM   2144  O   PHE A 210      50.840  25.770  75.260  1.00  0.00
ATOM   2145  N   TYR A 211      51.210  26.230  77.410  1.00  0.00
ATOM   2146  H   TYR A 211      50.950  26.080  78.360  1.00  0.00
ATOM   2147  CA  TYR A 211      51.870  27.510  77.120  1.00  0.00
ATOM   2148  CB  TYR A 211      52.230  28.060  78.510  1.00  0.00
ATOM   2149  CG  TYR A 211      53.160  29.260  78.640  1.00  0.00
ATOM   2150  CD1 TYR A 211      52.980  30.510  78.060  1.00  0.00
ATOM   2151  HD1 TYR A 211      51.990  30.780  77.700  1.00  0.00
ATOM   2152  CD2 TYR A 211      54.260  29.040  79.460  1.00  0.00
ATOM   2153  HD2 TYR A 211      54.540  28.010  79.650  1.00  0.00
ATOM   2154  CE1 TYR A 211      53.930  31.500  78.300  1.00  0.00
ATOM   2155  HE1 TYR A 211      53.820  32.330  77.590  1.00  0.00
ATOM   2156  CE2 TYR A 211      55.170  30.070  79.680  1.00  0.00
ATOM   2157  HE2 TYR A 211      56.000  29.870  80.360  1.00  0.00
ATOM   2158  CZ  TYR A 211      55.070  31.310  79.070  1.00  0.00
ATOM   2159  OH  TYR A 211      56.020  32.280  79.180  1.00  0.00
ATOM   2160  HH  TYR A 211      56.810  31.970  79.710  1.00  0.00
ATOM   2161  C   TYR A 211      53.060  27.500  76.160  1.00  0.00
ATOM   2162  O   TYR A 211      53.070  28.180  75.140  1.00  0.00
ATOM   2163  N   ASN A 212      53.850  26.430  76.230  1.00  0.00
ATOM   2164  H   ASN A 212      53.660  25.670  76.850  1.00  0.00
ATOM   2165  CA  ASN A 212      55.030  26.200  75.390  1.00  0.00
ATOM   2166  CB  ASN A 212      55.970  25.170  76.020  1.00  0.00
ATOM   2167  CG  ASN A 212      56.540  25.250  77.430  1.00  0.00
ATOM   2168  OD1 ASN A 212      57.020  26.210  78.040  1.00  0.00
ATOM   2169  ND2 ASN A 212      56.480  24.080  78.080  1.00  0.00
ATOM   2170 HD21 ASN A 212      56.150  23.230  77.670  1.00  0.00
ATOM   2171 HD22 ASN A 212      56.920  24.100  78.970  1.00  0.00
ATOM   2172  C   ASN A 212      54.640  25.720  73.990  1.00  0.00
ATOM   2173  O   ASN A 212      54.940  26.260  72.930  1.00  0.00
ATOM   2174  N   PHE A 213      53.640  24.840  73.940  1.00  0.00
ATOM   2175  H   PHE A 213      53.320  24.380  74.770  1.00  0.00
ATOM   2176  CA  PHE A 213      52.900  24.420  72.740  1.00  0.00
ATOM   2177  CB  PHE A 213      51.820  23.370  73.010  1.00  0.00
ATOM   2178  CG  PHE A 213      52.430  21.970  73.040  1.00  0.00
ATOM   2179  CD1 PHE A 213      53.140  21.440  71.970  1.00  0.00
ATOM   2180  HD1 PHE A 213      53.480  22.070  71.140  1.00  0.00
ATOM   2181  CD2 PHE A 213      52.170  21.170  74.140  1.00  0.00
ATOM   2182  HD2 PHE A 213      51.750  21.630  75.040  1.00  0.00
ATOM   2183  CE1 PHE A 213      53.530  20.110  71.880  1.00  0.00
ATOM   2184  HE1 PHE A 213      53.830  19.690  70.920  1.00  0.00
ATOM   2185  CE2 PHE A 213      52.490  19.820  74.070  1.00  0.00
ATOM   2186  HE2 PHE A 213      52.050  19.160  74.820  1.00  0.00
ATOM   2187  CZ  PHE A 213      53.050  19.300  72.910  1.00  0.00
ATOM   2188  HZ  PHE A 213      53.100  18.220  72.860  1.00  0.00
ATOM   2189  C   PHE A 213      52.290  25.630  72.030  1.00  0.00
ATOM   2190  O   PHE A 213      51.980  25.490  70.850  1.00  0.00
ATOM   2191  N   PHE A 214      51.920  26.710  72.720  1.00  0.00
ATOM   2192  H   PHE A 214      51.790  26.610  73.710  1.00  0.00
ATOM   2193  CA  PHE A 214      51.600  28.030  72.150  1.00  0.00
ATOM   2194  CB  PHE A 214      50.730  28.720  73.210  1.00  0.00
ATOM   2195  CG  PHE A 214      50.620  30.220  72.900  1.00  0.00
ATOM   2196  CD1 PHE A 214      51.330  31.070  73.740  1.00  0.00
ATOM   2197  HD1 PHE A 214      51.950  30.730  74.570  1.00  0.00
ATOM   2198  CD2 PHE A 214      49.720  30.720  71.970  1.00  0.00
ATOM   2199  HD2 PHE A 214      49.290  30.070  71.220  1.00  0.00
ATOM   2200  CE1 PHE A 214      51.090  32.440  73.740  1.00  0.00
ATOM   2201  HE1 PHE A 214      51.530  33.060  74.520  1.00  0.00
ATOM   2202  CE2 PHE A 214      49.500  32.090  71.970  1.00  0.00
ATOM   2203  HE2 PHE A 214      48.870  32.520  71.190  1.00  0.00
ATOM   2204  CZ  PHE A 214      50.120  32.940  72.880  1.00  0.00
ATOM   2205  HZ  PHE A 214      49.560  33.820  73.200  1.00  0.00
ATOM   2206  C   PHE A 214      52.840  28.810  71.690  1.00  0.00
ATOM   2207  O   PHE A 214      53.060  28.940  70.490  1.00  0.00
ATOM   2208  N   THR A 215      53.800  29.150  72.540  1.00  0.00
ATOM   2209  H   THR A 215      53.660  28.920  73.510  1.00  0.00
ATOM   2210  CA  THR A 215      54.940  29.990  72.160  1.00  0.00
ATOM   2211  CB  THR A 215      55.900  30.300  73.310  1.00  0.00
ATOM   2212  OG1 THR A 215      56.430  29.180  74.030  1.00  0.00
ATOM   2213  HG1 THR A 215      56.400  29.420  75.000  1.00  0.00
ATOM   2214  CG2 THR A 215      55.280  31.320  74.270  1.00  0.00
ATOM   2215  C   THR A 215      55.770  29.390  71.020  1.00  0.00
ATOM   2216  O   THR A 215      55.790  29.930  69.920  1.00  0.00
ATOM   2217  N   PHE A 216      55.790  28.060  70.910  1.00  0.00
ATOM   2218  H   PHE A 216      55.440  27.460  71.630  1.00  0.00
ATOM   2219  CA  PHE A 216      56.600  27.330  69.920  1.00  0.00
ATOM   2220  CB  PHE A 216      57.220  26.050  70.490  1.00  0.00
ATOM   2221  CG  PHE A 216      58.420  26.390  71.380  1.00  0.00
ATOM   2222  CD1 PHE A 216      58.330  26.770  72.710  1.00  0.00
ATOM   2223  HD1 PHE A 216      57.420  26.550  73.270  1.00  0.00
ATOM   2224  CD2 PHE A 216      59.630  26.570  70.720  1.00  0.00
ATOM   2225  HD2 PHE A 216      59.650  26.540  69.630  1.00  0.00
ATOM   2226  CE1 PHE A 216      59.490  27.100  73.410  1.00  0.00
ATOM   2227  HE1 PHE A 216      59.460  27.370  74.460  1.00  0.00
ATOM   2228  CE2 PHE A 216      60.770  27.020  71.370  1.00  0.00
ATOM   2229  HE2 PHE A 216      61.690  27.060  70.790  1.00  0.00
ATOM   2230  CZ  PHE A 216      60.710  27.190  72.750  1.00  0.00
ATOM   2231  HZ  PHE A 216      61.590  27.350  73.380  1.00  0.00
ATOM   2232  C   PHE A 216      55.820  26.930  68.660  1.00  0.00
ATOM   2233  O   PHE A 216      56.410  26.340  67.760  1.00  0.00
ATOM   2234  N   SER A 217      54.530  27.210  68.540  1.00  0.00
ATOM   2235  H   SER A 217      54.060  27.550  69.360  1.00  0.00
ATOM   2236  CA  SER A 217      53.650  26.960  67.390  1.00  0.00
ATOM   2237  CB  SER A 217      52.320  26.260  67.660  1.00  0.00
ATOM   2238  OG  SER A 217      51.500  26.930  68.620  1.00  0.00
ATOM   2239  HG  SER A 217      51.250  26.450  69.470  1.00  0.00
ATOM   2240  C   SER A 217      53.320  28.320  66.780  1.00  0.00
ATOM   2241  O   SER A 217      53.980  28.650  65.790  1.00  0.00
ATOM   2242  N   CYS A 218      52.730  29.170  67.620  1.00  0.00
ATOM   2243  H   CYS A 218      52.300  28.900  68.480  1.00  0.00
ATOM   2244  CA  CYS A 218      52.340  30.520  67.210  1.00  0.00
ATOM   2245  CB  CYS A 218      51.650  31.220  68.390  1.00  0.00
ATOM   2246  SG  CYS A 218      52.790  31.670  69.740  1.00  0.00
ATOM   2247  HG  CYS A 218      53.380  30.490  69.910  1.00  0.00
ATOM   2248  C   CYS A 218      53.380  31.440  66.560  1.00  0.00
ATOM   2249  O   CYS A 218      52.990  32.460  65.990  1.00  0.00
ATOM   2250  N   LEU A 219      54.600  31.380  67.090  1.00  0.00
ATOM   2251  H   LEU A 219      54.750  31.050  68.020  1.00  0.00
ATOM   2252  CA  LEU A 219      55.770  32.060  66.530  1.00  0.00
ATOM   2253  CB  LEU A 219      56.830  32.310  67.600  1.00  0.00
ATOM   2254  CG  LEU A 219      56.670  33.680  68.250  1.00  0.00
ATOM   2255  CD1 LEU A 219      57.470  33.610  69.550  1.00  0.00
ATOM   2256  CD2 LEU A 219      57.080  34.890  67.410  1.00  0.00
ATOM   2257  C   LEU A 219      56.450  31.290  65.390  1.00  0.00
ATOM   2258  O   LEU A 219      56.750  32.000  64.430  1.00  0.00
ATOM   2259  N   PHE A 220      56.520  29.960  65.370  1.00  0.00
ATOM   2260  H   PHE A 220      55.840  29.480  65.910  1.00  0.00
ATOM   2261  CA  PHE A 220      57.230  29.190  64.330  1.00  0.00
ATOM   2262  CB  PHE A 220      57.420  27.710  64.650  1.00  0.00
ATOM   2263  CG  PHE A 220      58.620  27.430  65.550  1.00  0.00
ATOM   2264  CD1 PHE A 220      59.440  26.410  65.080  1.00  0.00
ATOM   2265  HD1 PHE A 220      58.960  25.680  64.420  1.00  0.00
ATOM   2266  CD2 PHE A 220      58.920  28.170  66.690  1.00  0.00
ATOM   2267  HD2 PHE A 220      58.260  28.840  67.240  1.00  0.00
ATOM   2268  CE1 PHE A 220      60.670  26.210  65.700  1.00  0.00
ATOM   2269  HE1 PHE A 220      61.240  25.300  65.540  1.00  0.00
ATOM   2270  CE2 PHE A 220      60.150  27.920  67.290  1.00  0.00
ATOM   2271  HE2 PHE A 220      60.310  28.360  68.280  1.00  0.00
ATOM   2272  CZ  PHE A 220      61.040  26.980  66.790  1.00  0.00
ATOM   2273  HZ  PHE A 220      62.130  27.040  66.920  1.00  0.00
ATOM   2274  C   PHE A 220      56.760  29.340  62.880  1.00  0.00
ATOM   2275  O   PHE A 220      57.620  29.510  62.020  1.00  0.00
ATOM   2276  N   ILE A 221      55.460  29.570  62.750  1.00  0.00
ATOM   2277  H   ILE A 221      54.820  29.630  63.520  1.00  0.00
ATOM   2278  CA  ILE A 221      54.790  30.090  61.540  1.00  0.00
ATOM   2279  CB  ILE A 221      53.310  29.730  61.710  1.00  0.00
ATOM   2280  CG1 ILE A 221      53.260  28.210  61.800  1.00  0.00
ATOM   2281  CG2 ILE A 221      52.220  30.330  60.820  1.00  0.00
ATOM   2282  CD  ILE A 221      51.890  27.530  61.830  1.00  0.00
ATOM   2283  C   ILE A 221      55.080  31.530  61.120  1.00  0.00
ATOM   2284  O   ILE A 221      55.270  31.780  59.930  1.00  0.00
ATOM   2285  N   ILE A 222      55.310  32.460  62.040  1.00  0.00
ATOM   2286  H   ILE A 222      55.590  32.200  62.960  1.00  0.00
ATOM   2287  CA  ILE A 222      55.470  33.860  61.640  1.00  0.00
ATOM   2288  CB  ILE A 222      55.200  34.800  62.820  1.00  0.00
ATOM   2289  CG1 ILE A 222      53.880  34.480  63.530  1.00  0.00
ATOM   2290  CG2 ILE A 222      55.260  36.310  62.580  1.00  0.00
ATOM   2291  CD  ILE A 222      52.610  34.550  62.690  1.00  0.00
ATOM   2292  C   ILE A 222      56.610  34.290  60.720  1.00  0.00
ATOM   2293  O   ILE A 222      56.350  35.060  59.790  1.00  0.00
ATOM   2294  N   PRO A 223      57.820  33.730  60.750  1.00  0.00
ATOM   2295  CA  PRO A 223      58.770  33.890  59.650  1.00  0.00
ATOM   2296  CB  PRO A 223      60.090  33.240  60.090  1.00  0.00
ATOM   2297  CG  PRO A 223      59.820  32.630  61.470  1.00  0.00
ATOM   2298  CD  PRO A 223      58.530  33.290  61.960  1.00  0.00
ATOM   2299  C   PRO A 223      58.410  33.370  58.250  1.00  0.00
ATOM   2300  O   PRO A 223      58.610  34.010  57.220  1.00  0.00
ATOM   2301  N   LEU A 224      58.030  32.100  58.170  1.00  0.00
ATOM   2302  H   LEU A 224      58.030  31.520  58.980  1.00  0.00
ATOM   2303  CA  LEU A 224      57.550  31.360  56.990  1.00  0.00
ATOM   2304  CB  LEU A 224      57.190  29.950  57.460  1.00  0.00
ATOM   2305  CG  LEU A 224      58.240  29.090  58.160  1.00  0.00
ATOM   2306  CD1 LEU A 224      57.550  27.830  58.670  1.00  0.00
ATOM   2307  CD2 LEU A 224      59.380  28.620  57.250  1.00  0.00
ATOM   2308  C   LEU A 224      56.330  32.030  56.370  1.00  0.00
ATOM   2309  O   LEU A 224      56.380  32.140  55.140  1.00  0.00
ATOM   2310  N   PHE A 225      55.410  32.580  57.160  1.00  0.00
ATOM   2311  H   PHE A 225      55.320  32.340  58.120  1.00  0.00
ATOM   2312  CA  PHE A 225      54.420  33.520  56.620  1.00  0.00
ATOM   2313  CB  PHE A 225      53.270  33.820  57.580  1.00  0.00
ATOM   2314  CG  PHE A 225      52.160  34.510  56.780  1.00  0.00
ATOM   2315  CD1 PHE A 225      51.540  33.960  55.660  1.00  0.00
ATOM   2316  HD1 PHE A 225      51.870  33.030  55.190  1.00  0.00
ATOM   2317  CD2 PHE A 225      51.590  35.700  57.220  1.00  0.00
ATOM   2318  HD2 PHE A 225      52.010  36.200  58.090  1.00  0.00
ATOM   2319  CE1 PHE A 225      50.380  34.460  55.090  1.00  0.00
ATOM   2320  HE1 PHE A 225      49.700  33.650  54.840  1.00  0.00
ATOM   2321  CE2 PHE A 225      50.460  36.280  56.660  1.00  0.00
ATOM   2322  HE2 PHE A 225      50.010  37.140  57.150  1.00  0.00
ATOM   2323  CZ  PHE A 225      49.890  35.680  55.540  1.00  0.00
ATOM   2324  HZ  PHE A 225      48.970  36.060  55.090  1.00  0.00
ATOM   2325  C   PHE A 225      55.050  34.790  56.040  1.00  0.00
ATOM   2326  O   PHE A 225      54.760  35.170  54.910  1.00  0.00
ATOM   2327  N   ILE A 226      55.960  35.460  56.730  1.00  0.00
ATOM   2328  H   ILE A 226      56.300  35.170  57.630  1.00  0.00
ATOM   2329  CA  ILE A 226      56.500  36.710  56.180  1.00  0.00
ATOM   2330  CB  ILE A 226      57.070  37.590  57.300  1.00  0.00
ATOM   2331  CG1 ILE A 226      56.010  37.760  58.400  1.00  0.00
ATOM   2332  CG2 ILE A 226      57.710  38.860  56.750  1.00  0.00
ATOM   2333  CD  ILE A 226      56.390  38.680  59.560  1.00  0.00
ATOM   2334  C   ILE A 226      57.350  36.600  54.920  1.00  0.00
ATOM   2335  O   ILE A 226      57.300  37.400  53.990  1.00  0.00
ATOM   2336  N   MET A 227      57.980  35.440  54.750  1.00  0.00
ATOM   2337  H   MET A 227      58.090  34.770  55.480  1.00  0.00
ATOM   2338  CA  MET A 227      58.680  35.060  53.510  1.00  0.00
ATOM   2339  CB  MET A 227      59.520  33.810  53.800  1.00  0.00
ATOM   2340  CG  MET A 227      60.640  33.900  54.830  1.00  0.00
ATOM   2341  SD  MET A 227      61.320  32.260  55.270  1.00  0.00
ATOM   2342  CE  MET A 227      62.030  32.680  56.840  1.00  0.00
ATOM   2343  C   MET A 227      57.830  34.830  52.270  1.00  0.00
ATOM   2344  O   MET A 227      57.940  35.510  51.250  1.00  0.00
ATOM   2345  N   LEU A 228      56.730  34.110  52.460  1.00  0.00
ATOM   2346  H   LEU A 228      56.450  33.770  53.360  1.00  0.00
ATOM   2347  CA  LEU A 228      55.740  33.750  51.430  1.00  0.00
ATOM   2348  CB  LEU A 228      54.510  32.940  51.830  1.00  0.00
ATOM   2349  CG  LEU A 228      54.840  31.460  51.990  1.00  0.00
ATOM   2350  CD1 LEU A 228      53.800  30.820  52.910  1.00  0.00
ATOM   2351  CD2 LEU A 228      55.060  30.790  50.630  1.00  0.00
ATOM   2352  C   LEU A 228      55.030  34.920  50.760  1.00  0.00
ATOM   2353  O   LEU A 228      54.970  35.070  49.540  1.00  0.00
ATOM   2354  N   ILE A 229      54.810  35.960  51.570  1.00  0.00
ATOM   2355  H   ILE A 229      54.790  35.780  52.550  1.00  0.00
ATOM   2356  CA  ILE A 229      54.340  37.320  51.280  1.00  0.00
ATOM   2357  CB  ILE A 229      53.970  38.160  52.500  1.00  0.00
ATOM   2358  CG1 ILE A 229      53.220  37.380  53.580  1.00  0.00
ATOM   2359  CG2 ILE A 229      52.930  39.100  51.880  1.00  0.00
ATOM   2360  CD  ILE A 229      52.970  38.340  54.750  1.00  0.00
ATOM   2361  C   ILE A 229      55.340  37.980  50.330  1.00  0.00
ATOM   2362  O   ILE A 229      54.990  38.210  49.170  1.00  0.00
ATOM   2363  N   CYS A 230      56.560  38.200  50.810  1.00  0.00
ATOM   2364  H   CYS A 230      56.650  38.060  51.800  1.00  0.00
ATOM   2365  CA  CYS A 230      57.690  38.810  50.110  1.00  0.00
ATOM   2366  CB  CYS A 230      58.820  38.790  51.140  1.00  0.00
ATOM   2367  SG  CYS A 230      60.270  39.820  50.690  1.00  0.00
ATOM   2368  HG  CYS A 230      59.630  40.940  51.010  1.00  0.00
ATOM   2369  C   CYS A 230      58.080  38.100  48.810  1.00  0.00
ATOM   2370  O   CYS A 230      58.300  38.750  47.790  1.00  0.00
ATOM   2371  N   ASN A 231      58.010  36.770  48.880  1.00  0.00
ATOM   2372  H   ASN A 231      58.030  36.200  49.700  1.00  0.00
ATOM   2373  CA  ASN A 231      58.160  35.840  47.760  1.00  0.00
ATOM   2374  CB  ASN A 231      58.050  34.390  48.240  1.00  0.00
ATOM   2375  CG  ASN A 231      58.680  33.330  47.330  1.00  0.00
ATOM   2376  OD1 ASN A 231      58.100  32.830  46.370  1.00  0.00
ATOM   2377  ND2 ASN A 231      60.000  33.180  47.390  1.00  0.00
ATOM   2378 HD21 ASN A 231      60.470  33.920  47.880  1.00  0.00
ATOM   2379 HD22 ASN A 231      60.490  32.370  47.070  1.00  0.00
ATOM   2380  C   ASN A 231      57.100  36.100  46.690  1.00  0.00
ATOM   2381  O   ASN A 231      57.380  36.680  45.640  1.00  0.00
ATOM   2382  N   ALA A 232      55.820  35.910  47.000  1.00  0.00
ATOM   2383  H   ALA A 232      55.510  35.480  47.840  1.00  0.00
ATOM   2384  CA  ALA A 232      54.720  35.910  46.020  1.00  0.00
ATOM   2385  CB  ALA A 232      53.760  34.760  46.320  1.00  0.00
ATOM   2386  C   ALA A 232      53.910  37.200  45.850  1.00  0.00
ATOM   2387  O   ALA A 232      54.020  37.830  44.800  1.00  0.00
ATOM   2388  N   LYS A 233      53.220  37.600  46.920  1.00  0.00
ATOM   2389  H   LYS A 233      53.410  37.230  47.830  1.00  0.00
ATOM   2390  CA  LYS A 233      52.320  38.760  46.860  1.00  0.00
ATOM   2391  CB  LYS A 233      51.350  38.720  48.050  1.00  0.00
ATOM   2392  CG  LYS A 233      50.110  37.860  47.830  1.00  0.00
ATOM   2393  CD  LYS A 233      49.360  38.300  46.570  1.00  0.00
ATOM   2394  CE  LYS A 233      48.330  37.250  46.150  1.00  0.00
ATOM   2395  NZ  LYS A 233      47.420  37.710  45.100  1.00  0.00
ATOM   2396  HZ1 LYS A 233      47.970  37.830  44.270  1.00  0.00
ATOM   2397  HZ2 LYS A 233      46.680  37.070  44.900  1.00  0.00
ATOM   2398  HZ3 LYS A 233      47.120  38.630  45.350  1.00  0.00
ATOM   2399  C   LYS A 233      52.980  40.110  46.560  1.00  0.00
ATOM   2400  O   LYS A 233      52.520  40.880  45.720  1.00  0.00
ATOM   2401  N   ILE A 234      54.130  40.430  47.120  1.00  0.00
ATOM   2402  H   ILE A 234      54.600  39.770  47.710  1.00  0.00
ATOM   2403  CA  ILE A 234      54.840  41.680  46.790  1.00  0.00
ATOM   2404  CB  ILE A 234      55.590  42.230  48.010  1.00  0.00
ATOM   2405  CG1 ILE A 234      54.570  42.260  49.150  1.00  0.00
ATOM   2406  CG2 ILE A 234      56.270  43.580  47.760  1.00  0.00
ATOM   2407  CD  ILE A 234      53.220  42.950  48.930  1.00  0.00
ATOM   2408  C   ILE A 234      55.810  41.560  45.620  1.00  0.00
ATOM   2409  O   ILE A 234      56.850  40.940  45.860  1.00  0.00
ATOM   2410  N   ILE A 235      55.700  42.620  44.840  1.00  0.00
ATOM   2411  H   ILE A 235      55.270  43.490  45.070  1.00  0.00
ATOM   2412  CA  ILE A 235      56.460  42.810  43.590  1.00  0.00
ATOM   2413  CB  ILE A 235      55.490  43.320  42.520  1.00  0.00
ATOM   2414  CG1 ILE A 235      54.640  42.110  42.120  1.00  0.00
ATOM   2415  CG2 ILE A 235      56.170  43.880  41.270  1.00  0.00
ATOM   2416  CD  ILE A 235      53.300  42.430  41.450  1.00  0.00
ATOM   2417  C   ILE A 235      57.560  43.810  43.960  1.00  0.00
ATOM   2418  O   ILE A 235      57.250  44.900  44.430  1.00  0.00
ATOM   2419  N   PHE A 236      58.740  43.500  43.440  1.00  0.00
ATOM   2420  H   PHE A 236      58.850  42.650  42.930  1.00  0.00
ATOM   2421  CA  PHE A 236      59.920  44.320  43.760  1.00  0.00
ATOM   2422  CB  PHE A 236      61.190  43.490  43.950  1.00  0.00
ATOM   2423  CG  PHE A 236      61.050  42.390  45.010  1.00  0.00
ATOM   2424  CD1 PHE A 236      61.530  41.110  44.730  1.00  0.00
ATOM   2425  HD1 PHE A 236      61.510  40.790  43.690  1.00  0.00
ATOM   2426  CD2 PHE A 236      60.760  42.710  46.330  1.00  0.00
ATOM   2427  HD2 PHE A 236      60.330  43.700  46.470  1.00  0.00
ATOM   2428  CE1 PHE A 236      61.890  40.190  45.710  1.00  0.00
ATOM   2429  HE1 PHE A 236      62.520  39.330  45.480  1.00  0.00
ATOM   2430  CE2 PHE A 236      60.950  41.750  47.320  1.00  0.00
ATOM   2431  HE2 PHE A 236      60.810  42.080  48.350  1.00  0.00
ATOM   2432  CZ  PHE A 236      61.520  40.530  47.000  1.00  0.00
ATOM   2433  HZ  PHE A 236      61.700  39.730  47.730  1.00  0.00
ATOM   2434  C   PHE A 236      60.260  45.280  42.610  1.00  0.00
ATOM   2435  O   PHE A 236      61.060  44.940  41.740  1.00  0.00
ATOM   2436  N   THR A 237      59.980  46.550  42.890  1.00  0.00
ATOM   2437  H   THR A 237      60.000  46.810  43.860  1.00  0.00
ATOM   2438  CA  THR A 237      59.980  47.680  41.960  1.00  0.00
ATOM   2439  CB  THR A 237      58.690  48.510  41.910  1.00  0.00
ATOM   2440  OG1 THR A 237      58.040  48.650  43.180  1.00  0.00
ATOM   2441  HG1 THR A 237      58.630  49.100  43.850  1.00  0.00
ATOM   2442  CG2 THR A 237      57.810  47.920  40.810  1.00  0.00
ATOM   2443  C   THR A 237      61.090  48.720  42.120  1.00  0.00
ATOM   2444  O   THR A 237      61.510  49.010  43.240  1.00  0.00
ATOM   2445  N   LEU A 238      61.470  49.300  40.980  1.00  0.00
ATOM   2446  H   LEU A 238      61.020  49.040  40.130  1.00  0.00
ATOM   2447  CA  LEU A 238      62.670  50.150  40.880  1.00  0.00
ATOM   2448  CB  LEU A 238      63.170  49.940  39.450  1.00  0.00
ATOM   2449  CG  LEU A 238      63.850  48.590  39.260  1.00  0.00
ATOM   2450  CD1 LEU A 238      63.640  48.090  37.830  1.00  0.00
ATOM   2451  CD2 LEU A 238      65.350  48.660  39.570  1.00  0.00
ATOM   2452  C   LEU A 238      62.520  51.620  41.290  1.00  0.00
ATOM   2453  O   LEU A 238      61.460  52.170  41.010  1.00  0.00
ATOM   2454  N   THR A 239      63.580  52.190  41.860  1.00  0.00
ATOM   2455  H   THR A 239      64.460  51.720  41.890  1.00  0.00
ATOM   2456  CA  THR A 239      63.590  53.520  42.500  1.00  0.00
ATOM   2457  CB  THR A 239      63.780  54.530  41.370  1.00  0.00
ATOM   2458  OG1 THR A 239      62.660  54.600  40.480  1.00  0.00
ATOM   2459  HG1 THR A 239      62.990  55.210  39.770  1.00  0.00
ATOM   2460  CG2 THR A 239      65.120  54.390  40.660  1.00  0.00
ATOM   2461  C   THR A 239      62.530  53.780  43.570  1.00  0.00
ATOM   2462  O   THR A 239      62.950  54.360  44.580  1.00  0.00
ATOM   2463  N   ARG A 240      61.240  53.640  43.280  1.00  0.00
ATOM   2464  H   ARG A 240      60.980  53.620  42.320  1.00  0.00
ATOM   2465  CA  ARG A 240      60.210  53.820  44.310  1.00  0.00
ATOM   2466  CB  ARG A 240      58.840  53.850  43.620  1.00  0.00
ATOM   2467  CG  ARG A 240      58.590  55.140  42.850  1.00  0.00
ATOM   2468  CD  ARG A 240      57.290  55.030  42.040  1.00  0.00
ATOM   2469  NE  ARG A 240      57.280  55.700  40.730  1.00  0.00
ATOM   2470  HE  ARG A 240      58.190  55.990  40.450  1.00  0.00
ATOM   2471  CZ  ARG A 240      56.200  55.940  39.970  1.00  0.00
ATOM   2472  NH1 ARG A 240      56.410  56.560  38.800  1.00  0.00
ATOM   2473 HH11 ARG A 240      55.700  56.940  38.210  1.00  0.00
ATOM   2474 HH12 ARG A 240      57.300  56.480  38.350  1.00  0.00
ATOM   2475  NH2 ARG A 240      54.960  55.500  40.220  1.00  0.00
ATOM   2476 HH21 ARG A 240      54.170  55.680  39.620  1.00  0.00
ATOM   2477 HH22 ARG A 240      54.710  55.120  41.100  1.00  0.00
ATOM   2478  C   ARG A 240      60.300  52.670  45.310  1.00  0.00
ATOM   2479  O   ARG A 240      59.560  51.700  45.200  1.00  0.00
ATOM   2480  N   VAL A 241      61.090  52.900  46.360  1.00  0.00
ATOM   2481  H   VAL A 241      61.880  53.500  46.260  1.00  0.00
ATOM   2482  CA  VAL A 241      61.060  51.970  47.500  1.00  0.00
ATOM   2483  CB  VAL A 241      62.340  52.180  48.320  1.00  0.00
ATOM   2484  CG1 VAL A 241      63.370  51.580  47.370  1.00  0.00
ATOM   2485  CG2 VAL A 241      62.820  53.600  48.620  1.00  0.00
ATOM   2486  C   VAL A 241      59.780  52.080  48.330  1.00  0.00
ATOM   2487  O   VAL A 241      59.180  53.140  48.500  1.00  0.00
ATOM   2488  N   LEU A 242      59.340  50.920  48.800  1.00  0.00
ATOM   2489  H   LEU A 242      59.820  50.060  48.620  1.00  0.00
ATOM   2490  CA  LEU A 242      58.160  50.610  49.630  1.00  0.00
ATOM   2491  CB  LEU A 242      58.150  51.390  50.950  1.00  0.00
ATOM   2492  CG  LEU A 242      59.390  51.130  51.800  1.00  0.00
ATOM   2493  CD1 LEU A 242      59.050  51.740  53.160  1.00  0.00
ATOM   2494  CD2 LEU A 242      59.690  49.640  51.950  1.00  0.00
ATOM   2495  C   LEU A 242      56.840  50.840  48.900  1.00  0.00
ATOM   2496  O   LEU A 242      55.920  50.020  48.980  1.00  0.00
ATOM   2497  N   HIS A 243      56.730  51.890  48.090  1.00  0.00
ATOM   2498  H   HIS A 243      57.500  52.520  47.970  1.00  0.00
ATOM   2499  CA  HIS A 243      55.700  52.160  47.080  1.00  0.00
ATOM   2500  CB  HIS A 243      55.940  53.630  46.730  1.00  0.00
ATOM   2501  CG  HIS A 243      54.780  54.330  46.010  1.00  0.00
ATOM   2502  ND1 HIS A 243      53.560  53.830  45.940  1.00  0.00
ATOM   2503  CD2 HIS A 243      54.730  55.580  45.560  1.00  0.00
ATOM   2504  HD2 HIS A 243      54.730  56.400  46.280  1.00  0.00
ATOM   2505  CE1 HIS A 243      52.890  54.890  45.500  1.00  0.00
ATOM   2506  HE1 HIS A 243      51.880  54.760  45.120  1.00  0.00
ATOM   2507  NE2 HIS A 243      53.680  55.630  44.730  1.00  0.00
ATOM   2508  HE2 HIS A 243      53.550  56.200  43.920  1.00  0.00
ATOM   2509  C   HIS A 243      55.940  51.390  45.770  1.00  0.00
ATOM   2510  O   HIS A 243      56.980  50.730  45.710  1.00  0.00
ATOM   2511  N   GLN A 244      55.180  51.740  44.740  1.00  0.00
ATOM   2512  H   GLN A 244      54.700  52.620  44.740  1.00  0.00
ATOM   2513  CA  GLN A 244      55.280  50.920  43.520  1.00  0.00
ATOM   2514  CB  GLN A 244      54.140  49.900  43.570  1.00  0.00
ATOM   2515  CG  GLN A 244      52.730  50.440  43.850  1.00  0.00
ATOM   2516  CD  GLN A 244      51.700  49.310  43.720  1.00  0.00
ATOM   2517  OE1 GLN A 244      51.390  48.520  44.600  1.00  0.00
ATOM   2518  NE2 GLN A 244      51.320  49.060  42.470  1.00  0.00
ATOM   2519 HE21 GLN A 244      51.830  49.580  41.780  1.00  0.00
ATOM   2520 HE22 GLN A 244      50.590  48.400  42.280  1.00  0.00
ATOM   2521  C   GLN A 244      55.290  51.650  42.180  1.00  0.00
ATOM   2522  O   GLN A 244      54.840  52.790  42.010  1.00  0.00
ATOM   2523  N   ASP A 245      56.020  51.030  41.260  1.00  0.00
ATOM   2524  H   ASP A 245      56.490  50.200  41.550  1.00  0.00
ATOM   2525  CA  ASP A 245      56.250  51.550  39.900  1.00  0.00
ATOM   2526  CB  ASP A 245      57.730  51.860  39.670  1.00  0.00
ATOM   2527  CG  ASP A 245      57.980  52.920  38.600  1.00  0.00
ATOM   2528  OD1 ASP A 245      59.080  53.500  38.550  1.00  0.00
ATOM   2529  OD2 ASP A 245      57.150  53.030  37.670  1.00  0.00
ATOM   2530  C   ASP A 245      55.640  50.670  38.810  1.00  0.00
ATOM   2531  O   ASP A 245      56.170  49.580  38.670  1.00  0.00
ATOM   2532  N   PRO A 246      54.440  50.980  38.330  1.00  0.00
ATOM   2533  CA  PRO A 246      53.740  52.220  38.730  1.00  0.00
ATOM   2534  CB  PRO A 246      53.550  52.810  37.330  1.00  0.00
ATOM   2535  CG  PRO A 246      53.040  51.580  36.570  1.00  0.00
ATOM   2536  CD  PRO A 246      53.840  50.400  37.110  1.00  0.00
ATOM   2537  C   PRO A 246      52.530  51.820  39.570  1.00  0.00
ATOM   2538  O   PRO A 246      52.560  50.800  40.260  1.00  0.00
ATOM   2539  N   HIS A 247      51.400  52.510  39.420  1.00  0.00
ATOM   2540  H   HIS A 247      51.200  53.140  38.670  1.00  0.00
ATOM   2541  CA  HIS A 247      50.150  52.250  40.140  1.00  0.00
ATOM   2542  CB  HIS A 247      49.240  53.440  39.850  1.00  0.00
ATOM   2543  CG  HIS A 247      48.770  53.680  38.420  1.00  0.00
ATOM   2544  ND1 HIS A 247      49.530  53.670  37.320  1.00  0.00
ATOM   2545  CD2 HIS A 247      47.510  53.850  38.030  1.00  0.00
ATOM   2546  HD2 HIS A 247      46.830  52.990  38.070  1.00  0.00
ATOM   2547  CE1 HIS A 247      48.610  53.750  36.370  1.00  0.00
ATOM   2548  HE1 HIS A 247      48.550  53.310  35.370  1.00  0.00
ATOM   2549  NE2 HIS A 247      47.540  54.410  36.820  1.00  0.00
ATOM   2550  HE2 HIS A 247      46.810  54.820  36.280  1.00  0.00
ATOM   2551  C   HIS A 247      49.370  50.980  39.790  1.00  0.00
ATOM   2552  O   HIS A 247      48.770  50.340  40.650  1.00  0.00
ATOM   2553  N   GLU A 248      49.350  50.590  38.520  1.00  0.00
ATOM   2554  H   GLU A 248      49.600  51.210  37.770  1.00  0.00
ATOM   2555  CA  GLU A 248      48.910  49.270  38.040  1.00  0.00
ATOM   2556  CB  GLU A 248      48.000  49.510  36.830  1.00  0.00
ATOM   2557  CG  GLU A 248      46.660  50.190  37.090  1.00  0.00
ATOM   2558  CD  GLU A 248      45.880  50.360  35.790  1.00  0.00
ATOM   2559  OE1 GLU A 248      45.850  51.450  35.180  1.00  0.00
ATOM   2560  OE2 GLU A 248      45.090  49.420  35.530  1.00  0.00
ATOM   2561  C   GLU A 248      50.080  48.380  37.600  1.00  0.00
ATOM   2562  O   GLU A 248      50.980  48.860  36.910  1.00  0.00
ATOM   2563  N   LEU A 249      50.170  47.180  38.160  1.00  0.00
ATOM   2564  H   LEU A 249      49.610  46.780  38.890  1.00  0.00
ATOM   2565  CA  LEU A 249      51.330  46.310  37.930  1.00  0.00
ATOM   2566  CB  LEU A 249      51.650  45.630  39.260  1.00  0.00
ATOM   2567  CG  LEU A 249      52.140  46.640  40.310  1.00  0.00
ATOM   2568  CD1 LEU A 249      52.580  46.090  41.660  1.00  0.00
ATOM   2569  CD2 LEU A 249      53.350  47.480  39.900  1.00  0.00
ATOM   2570  C   LEU A 249      51.070  45.330  36.790  1.00  0.00
ATOM   2571  O   LEU A 249      50.110  44.550  36.850  1.00  0.00
ATOM   2572  N   GLN A 250      51.790  45.490  35.680  1.00  0.00
ATOM   2573  H   GLN A 250      51.410  45.100  34.840  1.00  0.00
ATOM   2574  CA  GLN A 250      52.930  46.370  35.360  1.00  0.00
ATOM   2575  CB  GLN A 250      54.300  45.720  35.520  1.00  0.00
ATOM   2576  CG  GLN A 250      54.980  46.650  36.540  1.00  0.00
ATOM   2577  CD  GLN A 250      56.460  46.400  36.850  1.00  0.00
ATOM   2578  OE1 GLN A 250      57.100  45.400  36.560  1.00  0.00
ATOM   2579  NE2 GLN A 250      57.170  47.380  37.400  1.00  0.00
ATOM   2580 HE21 GLN A 250      56.860  48.300  37.640  1.00  0.00
ATOM   2581 HE22 GLN A 250      58.090  47.170  37.740  1.00  0.00
ATOM   2582  C   GLN A 250      52.800  47.100  34.020  1.00  0.00
ATOM   2583  O   GLN A 250      53.160  46.610  32.960  1.00  0.00
ATOM   2584  N   LEU A 251      52.150  48.260  34.100  1.00  0.00
ATOM   2585  H   LEU A 251      51.520  48.340  34.870  1.00  0.00
ATOM   2586  CA  LEU A 251      52.090  49.260  33.030  1.00  0.00
ATOM   2587  CB  LEU A 251      50.820  50.100  33.170  1.00  0.00
ATOM   2588  CG  LEU A 251      49.580  49.480  32.530  1.00  0.00
ATOM   2589  CD1 LEU A 251      49.050  48.360  33.420  1.00  0.00
ATOM   2590  CD2 LEU A 251      48.500  50.540  32.270  1.00  0.00
ATOM   2591  C   LEU A 251      53.410  50.020  32.960  1.00  0.00
ATOM   2592  O   LEU A 251      54.240  50.070  33.870  1.00  0.00
ATOM   2593  N   ASN A 252      53.670  50.550  31.770  1.00  0.00
ATOM   2594  H   ASN A 252      53.140  50.380  30.940  1.00  0.00
ATOM   2595  CA  ASN A 252      54.850  51.410  31.620  1.00  0.00
ATOM   2596  CB  ASN A 252      55.940  50.770  30.750  1.00  0.00
ATOM   2597  CG  ASN A 252      57.330  51.220  31.200  1.00  0.00
ATOM   2598  OD1 ASN A 252      57.940  52.150  30.670  1.00  0.00
ATOM   2599  ND2 ASN A 252      57.980  50.400  32.030  1.00  0.00
ATOM   2600 HD21 ASN A 252      58.930  50.640  32.200  1.00  0.00
ATOM   2601 HD22 ASN A 252      57.570  49.570  32.390  1.00  0.00
ATOM   2602  C   ASN A 252      54.570  52.840  31.150  1.00  0.00
ATOM   2603  O   ASN A 252      55.200  53.760  31.680  1.00  0.00
ATOM   2604  N   GLN A 253      53.690  52.960  30.160  1.00  0.00
ATOM   2605  H   GLN A 253      53.260  52.140  29.770  1.00  0.00
ATOM   2606  CA  GLN A 253      53.330  54.260  29.580  1.00  0.00
ATOM   2607  CB  GLN A 253      53.560  54.440  28.080  1.00  0.00
ATOM   2608  CG  GLN A 253      55.050  54.630  27.800  1.00  0.00
ATOM   2609  CD  GLN A 253      55.310  54.680  26.300  1.00  0.00
ATOM   2610  OE1 GLN A 253      56.070  55.510  25.800  1.00  0.00
ATOM   2611  NE2 GLN A 253      54.870  53.630  25.620  1.00  0.00
ATOM   2612 HE21 GLN A 253      54.370  52.870  26.050  1.00  0.00
ATOM   2613 HE22 GLN A 253      55.020  53.580  24.630  1.00  0.00
ATOM   2614  C   GLN A 253      51.930  54.700  30.020  1.00  0.00
ATOM   2615  O   GLN A 253      50.900  54.460  29.380  1.00  0.00
ATOM   2616  N   SER A 254      51.890  55.090  31.290  1.00  0.00
ATOM   2617  H   SER A 254      52.690  55.080  31.890  1.00  0.00
ATOM   2618  CA  SER A 254      50.680  55.730  31.820  1.00  0.00
ATOM   2619  CB  SER A 254      49.890  54.880  32.820  1.00  0.00
ATOM   2620  OG  SER A 254      50.710  54.650  33.970  1.00  0.00
ATOM   2621  HG  SER A 254      50.090  54.510  34.750  1.00  0.00
ATOM   2622  C   SER A 254      50.850  57.190  32.250  1.00  0.00
ATOM   2623  O   SER A 254      51.760  57.490  33.020  1.00  0.00
ATOM   2624  N   LYS A 255      49.900  58.040  31.870  1.00  0.00
ATOM   2625  H   LYS A 255      49.240  57.720  31.200  1.00  0.00
ATOM   2626  CA  LYS A 255      49.740  59.430  32.330  1.00  0.00
ATOM   2627  CB  LYS A 255      48.860  60.130  31.290  1.00  0.00
ATOM   2628  CG  LYS A 255      48.930  61.630  31.600  1.00  0.00
ATOM   2629  CD  LYS A 255      47.560  62.300  31.590  1.00  0.00
ATOM   2630  CE  LYS A 255      47.550  63.830  31.640  1.00  0.00
ATOM   2631  NZ  LYS A 255      46.270  64.390  31.200  1.00  0.00
ATOM   2632  HZ1 LYS A 255      46.480  65.330  30.950  1.00  0.00
ATOM   2633  HZ2 LYS A 255      45.970  63.970  30.340  1.00  0.00
ATOM   2634  HZ3 LYS A 255      45.550  64.400  31.900  1.00  0.00
ATOM   2635  C   LYS A 255      49.110  59.610  33.710  1.00  0.00
ATOM   2636  O   LYS A 255      48.090  58.980  33.990  1.00  0.00
ATOM   2637  N   ASN A 256      49.940  60.060  34.660  1.00  0.00
ATOM   2638  H   ASN A 256      50.870  60.380  34.470  1.00  0.00
ATOM   2639  CA  ASN A 256      49.550  60.260  36.060  1.00  0.00
ATOM   2640  CB  ASN A 256      48.320  61.160  36.160  1.00  0.00
ATOM   2641  CG  ASN A 256      48.420  62.610  35.690  1.00  0.00
ATOM   2642  OD1 ASN A 256      49.460  63.270  35.660  1.00  0.00
ATOM   2643  ND2 ASN A 256      47.330  63.250  35.270  1.00  0.00
ATOM   2644 HD21 ASN A 256      47.470  64.200  34.970  1.00  0.00
ATOM   2645 HD22 ASN A 256      46.430  62.830  35.300  1.00  0.00
ATOM   2646  C   ASN A 256      49.400  58.960  36.860  1.00  0.00
ATOM   2647  O   ASN A 256      48.360  58.690  37.450  1.00  0.00
ATOM   2648  N   ASN A 257      50.530  58.310  37.120  1.00  0.00
ATOM   2649  H   ASN A 257      51.410  58.780  37.040  1.00  0.00
ATOM   2650  CA  ASN A 257      50.650  57.030  37.840  1.00  0.00
ATOM   2651  CB  ASN A 257      51.780  56.150  37.300  1.00  0.00
ATOM   2652  CG  ASN A 257      53.130  56.850  37.350  1.00  0.00
ATOM   2653  OD1 ASN A 257      53.670  57.290  38.360  1.00  0.00
ATOM   2654  ND2 ASN A 257      53.820  56.790  36.210  1.00  0.00
ATOM   2655 HD21 ASN A 257      54.700  57.260  36.120  1.00  0.00
ATOM   2656 HD22 ASN A 257      53.570  56.070  35.560  1.00  0.00
ATOM   2657  C   ASN A 257      50.640  57.100  39.360  1.00  0.00
ATOM   2658  O   ASN A 257      51.250  56.270  40.030  1.00  0.00
ATOM   2659  N   ILE A 258      49.660  57.870  39.830  1.00  0.00
ATOM   2660  H   ILE A 258      48.900  58.160  39.240  1.00  0.00
ATOM   2661  CA  ILE A 258      49.620  58.210  41.260  1.00  0.00
ATOM   2662  CB  ILE A 258      49.570  59.710  41.540  1.00  0.00
ATOM   2663  CG1 ILE A 258      48.550  60.520  40.720  1.00  0.00
ATOM   2664  CG2 ILE A 258      50.940  60.230  41.120  1.00  0.00
ATOM   2665  CD  ILE A 258      48.490  62.030  40.540  1.00  0.00
ATOM   2666  C   ILE A 258      48.440  57.450  41.870  1.00  0.00
ATOM   2667  O   ILE A 258      47.510  57.180  41.100  1.00  0.00
ATOM   2668  N   PRO A 259      48.470  57.180  43.170  1.00  0.00
ATOM   2669  CA  PRO A 259      47.380  56.570  43.950  1.00  0.00
ATOM   2670  CB  PRO A 259      48.080  55.640  44.950  1.00  0.00
ATOM   2671  CG  PRO A 259      49.440  55.450  44.290  1.00  0.00
ATOM   2672  CD  PRO A 259      49.780  56.850  43.780  1.00  0.00
ATOM   2673  C   PRO A 259      46.440  57.470  44.740  1.00  0.00
ATOM   2674  O   PRO A 259      46.970  58.370  45.380  1.00  0.00
ATOM   2675  N   ARG A 260      45.180  57.510  44.310  1.00  0.00
ATOM   2676  H   ARG A 260      44.910  56.870  43.590  1.00  0.00
ATOM   2677  CA  ARG A 260      44.090  58.310  44.890  1.00  0.00
ATOM   2678  CB  ARG A 260      43.460  59.310  43.910  1.00  0.00
ATOM   2679  CG  ARG A 260      44.140  60.680  43.900  1.00  0.00
ATOM   2680  CD  ARG A 260      43.400  61.600  42.930  1.00  0.00
ATOM   2681  NE  ARG A 260      43.760  61.340  41.530  1.00  0.00
ATOM   2682  HE  ARG A 260      43.520  60.460  41.120  1.00  0.00
ATOM   2683  CZ  ARG A 260      44.320  62.270  40.730  1.00  0.00
ATOM   2684  NH1 ARG A 260      44.560  63.490  41.220  1.00  0.00
ATOM   2685 HH11 ARG A 260      44.340  63.740  42.160  1.00  0.00
ATOM   2686 HH12 ARG A 260      45.030  64.170  40.660  1.00  0.00
ATOM   2687  NH2 ARG A 260      44.610  62.000  39.460  1.00  0.00
ATOM   2688 HH21 ARG A 260      44.330  61.070  39.190  1.00  0.00
ATOM   2689 HH22 ARG A 260      45.090  62.700  38.930  1.00  0.00
ATOM   2690  C   ARG A 260      43.000  57.400  45.470  1.00  0.00
ATOM   2691  O   ARG A 260      42.850  56.250  45.070  1.00  0.00
ATOM   2692  N   ALA A 261      42.140  57.920  46.340  1.00  0.00
ATOM   2693  H   ALA A 261      42.340  58.860  46.640  1.00  0.00
ATOM   2694  CA  ALA A 261      41.000  57.230  46.950  1.00  0.00
ATOM   2695  CB  ALA A 261      39.910  58.260  47.250  1.00  0.00
ATOM   2696  C   ALA A 261      40.490  55.850  46.500  1.00  0.00
ATOM   2697  O   ALA A 261      40.390  54.900  47.270  1.00  0.00
ATOM   2698  N   ARG A 262      39.900  55.920  45.310  1.00  0.00
ATOM   2699  H   ARG A 262      39.810  56.770  44.790  1.00  0.00
ATOM   2700  CA  ARG A 262      39.330  54.740  44.660  1.00  0.00
ATOM   2701  CB  ARG A 262      38.200  55.120  43.700  1.00  0.00
ATOM   2702  CG  ARG A 262      37.100  55.970  44.340  1.00  0.00
ATOM   2703  CD  ARG A 262      35.950  56.030  43.340  1.00  0.00
ATOM   2704  NE  ARG A 262      34.810  56.890  43.700  1.00  0.00
ATOM   2705  HE  ARG A 262      35.050  57.860  43.780  1.00  0.00
ATOM   2706  CZ  ARG A 262      33.510  56.610  43.840  1.00  0.00
ATOM   2707  NH1 ARG A 262      32.740  57.560  44.390  1.00  0.00
ATOM   2708 HH11 ARG A 262      33.320  58.330  44.650  1.00  0.00
ATOM   2709 HH12 ARG A 262      31.750  57.480  44.490  1.00  0.00
ATOM   2710  NH2 ARG A 262      32.980  55.500  43.310  1.00  0.00
ATOM   2711 HH21 ARG A 262      33.600  54.980  42.730  1.00  0.00
ATOM   2712 HH22 ARG A 262      32.200  55.000  43.700  1.00  0.00
ATOM   2713  C   ARG A 262      40.300  53.860  43.860  1.00  0.00
ATOM   2714  O   ARG A 262      39.940  52.750  43.490  1.00  0.00
ATOM   2715  N   LEU A 263      41.480  54.390  43.530  1.00  0.00
ATOM   2716  H   LEU A 263      41.960  55.140  43.990  1.00  0.00
ATOM   2717  CA  LEU A 263      42.440  53.700  42.650  1.00  0.00
ATOM   2718  CB  LEU A 263      43.410  54.710  42.060  1.00  0.00
ATOM   2719  CG  LEU A 263      43.480  54.630  40.530  1.00  0.00
ATOM   2720  CD1 LEU A 263      42.250  55.270  39.890  1.00  0.00
ATOM   2721  CD2 LEU A 263      44.750  55.320  40.020  1.00  0.00
ATOM   2722  C   LEU A 263      43.240  52.690  43.480  1.00  0.00
ATOM   2723  O   LEU A 263      44.290  52.960  44.050  1.00  0.00
ATOM   2724  N   LYS A 264      42.630  51.500  43.480  1.00  0.00
ATOM   2725  H   LYS A 264      41.820  51.490  42.890  1.00  0.00
ATOM   2726  CA  LYS A 264      43.020  50.240  44.120  1.00  0.00
ATOM   2727  CB  LYS A 264      41.860  49.290  43.800  1.00  0.00
ATOM   2728  CG  LYS A 264      41.920  48.050  44.680  1.00  0.00
ATOM   2729  CD  LYS A 264      41.160  46.970  43.910  1.00  0.00
ATOM   2730  CE  LYS A 264      41.270  45.630  44.650  1.00  0.00
ATOM   2731  NZ  LYS A 264      40.830  44.450  43.900  1.00  0.00
ATOM   2732  HZ1 LYS A 264      41.520  44.340  43.190  1.00  0.00
ATOM   2733  HZ2 LYS A 264      40.620  43.620  44.420  1.00  0.00
ATOM   2734  HZ3 LYS A 264      40.000  44.680  43.380  1.00  0.00
ATOM   2735  C   LYS A 264      44.390  49.670  43.750  1.00  0.00
ATOM   2736  O   LYS A 264      44.540  48.990  42.740  1.00  0.00
ATOM   2737  N   THR A 265      45.320  50.110  44.600  1.00  0.00
ATOM   2738  H   THR A 265      45.140  50.800  45.300  1.00  0.00
ATOM   2739  CA  THR A 265      46.690  49.580  44.540  1.00  0.00
ATOM   2740  CB  THR A 265      47.800  50.560  44.920  1.00  0.00
ATOM   2741  OG1 THR A 265      47.370  51.330  46.050  1.00  0.00
ATOM   2742  HG1 THR A 265      48.150  51.520  46.630  1.00  0.00
ATOM   2743  CG2 THR A 265      48.190  51.400  43.700  1.00  0.00
ATOM   2744  C   THR A 265      47.000  48.260  45.260  1.00  0.00
ATOM   2745  O   THR A 265      46.790  48.240  46.470  1.00  0.00
ATOM   2746  N   LEU A 266      47.880  47.490  44.640  1.00  0.00
ATOM   2747  H   LEU A 266      48.230  47.770  43.750  1.00  0.00
ATOM   2748  CA  LEU A 266      48.340  46.180  45.140  1.00  0.00
ATOM   2749  CB  LEU A 266      49.220  45.550  44.060  1.00  0.00
ATOM   2750  CG  LEU A 266      49.190  44.020  44.070  1.00  0.00
ATOM   2751  CD1 LEU A 266      47.780  43.430  43.990  1.00  0.00
ATOM   2752  CD2 LEU A 266      50.070  43.500  42.930  1.00  0.00
ATOM   2753  C   LEU A 266      49.100  46.290  46.460  1.00  0.00
ATOM   2754  O   LEU A 266      48.580  45.670  47.390  1.00  0.00
ATOM   2755  N   LYS A 267      50.280  46.890  46.430  1.00  0.00
ATOM   2756  H   LYS A 267      50.560  47.400  45.620  1.00  0.00
ATOM   2757  CA  LYS A 267      51.100  46.930  47.660  1.00  0.00
ATOM   2758  CB  LYS A 267      52.330  47.820  47.570  1.00  0.00
ATOM   2759  CG  LYS A 267      53.350  47.100  46.680  1.00  0.00
ATOM   2760  CD  LYS A 267      54.640  47.920  46.580  1.00  0.00
ATOM   2761  CE  LYS A 267      55.790  47.110  45.970  1.00  0.00
ATOM   2762  NZ  LYS A 267      57.160  47.590  46.190  1.00  0.00
ATOM   2763  HZ1 LYS A 267      57.290  48.490  45.790  1.00  0.00
ATOM   2764  HZ2 LYS A 267      57.330  47.600  47.180  1.00  0.00
ATOM   2765  HZ3 LYS A 267      57.860  47.000  45.800  1.00  0.00
ATOM   2766  C   LYS A 267      50.380  47.370  48.940  1.00  0.00
ATOM   2767  O   LYS A 267      50.710  47.000  50.070  1.00  0.00
ATOM   2768  N   MET A 268      49.520  48.370  48.800  1.00  0.00
ATOM   2769  H   MET A 268      49.430  48.820  47.910  1.00  0.00
ATOM   2770  CA  MET A 268      48.720  48.900  49.910  1.00  0.00
ATOM   2771  CB  MET A 268      48.010  50.190  49.480  1.00  0.00
ATOM   2772  CG  MET A 268      48.930  51.400  49.340  1.00  0.00
ATOM   2773  SD  MET A 268      50.000  51.250  47.870  1.00  0.00
ATOM   2774  CE  MET A 268      50.460  52.940  47.520  1.00  0.00
ATOM   2775  C   MET A 268      47.780  47.810  50.410  1.00  0.00
ATOM   2776  O   MET A 268      47.480  47.630  51.600  1.00  0.00
ATOM   2777  N   THR A 269      47.030  47.350  49.410  1.00  0.00
ATOM   2778  H   THR A 269      47.170  47.800  48.530  1.00  0.00
ATOM   2779  CA  THR A 269      45.920  46.430  49.710  1.00  0.00
ATOM   2780  CB  THR A 269      44.920  46.050  48.610  1.00  0.00
ATOM   2781  OG1 THR A 269      45.630  45.510  47.490  1.00  0.00
ATOM   2782  HG1 THR A 269      46.180  46.250  47.090  1.00  0.00
ATOM   2783  CG2 THR A 269      44.200  47.330  48.200  1.00  0.00
ATOM   2784  C   THR A 269      46.390  45.100  50.300  1.00  0.00
ATOM   2785  O   THR A 269      45.810  44.780  51.340  1.00  0.00
ATOM   2786  N   VAL A 270      47.530  44.540  49.910  1.00  0.00
ATOM   2787  H   VAL A 270      47.940  44.950  49.100  1.00  0.00
ATOM   2788  CA  VAL A 270      48.270  43.400  50.480  1.00  0.00
ATOM   2789  CB  VAL A 270      49.270  42.890  49.450  1.00  0.00
ATOM   2790  CG1 VAL A 270      50.020  41.660  49.970  1.00  0.00
ATOM   2791  CG2 VAL A 270      48.600  42.560  48.110  1.00  0.00
ATOM   2792  C   VAL A 270      48.900  43.770  51.820  1.00  0.00
ATOM   2793  O   VAL A 270      48.840  42.930  52.710  1.00  0.00
ATOM   2794  N   ALA A 271      49.500  44.950  51.980  1.00  0.00
ATOM   2795  H   ALA A 271      49.870  45.500  51.230  1.00  0.00
ATOM   2796  CA  ALA A 271      49.810  45.380  53.350  1.00  0.00
ATOM   2797  CB  ALA A 271      50.430  46.770  53.190  1.00  0.00
ATOM   2798  C   ALA A 271      48.670  45.320  54.380  1.00  0.00
ATOM   2799  O   ALA A 271      48.770  44.700  55.430  1.00  0.00
ATOM   2800  N   PHE A 272      47.490  45.790  53.980  1.00  0.00
ATOM   2801  H   PHE A 272      47.570  46.540  53.310  1.00  0.00
ATOM   2802  CA  PHE A 272      46.270  45.800  54.790  1.00  0.00
ATOM   2803  CB  PHE A 272      45.170  46.580  54.060  1.00  0.00
ATOM   2804  CG  PHE A 272      44.320  47.560  54.870  1.00  0.00
ATOM   2805  CD1 PHE A 272      44.840  48.710  55.460  1.00  0.00
ATOM   2806  HD1 PHE A 272      45.620  49.250  54.940  1.00  0.00
ATOM   2807  CD2 PHE A 272      43.130  47.050  55.390  1.00  0.00
ATOM   2808  HD2 PHE A 272      42.820  46.080  55.000  1.00  0.00
ATOM   2809  CE1 PHE A 272      44.170  49.310  56.520  1.00  0.00
ATOM   2810  HE1 PHE A 272      44.710  50.150  56.960  1.00  0.00
ATOM   2811  CE2 PHE A 272      42.440  47.710  56.400  1.00  0.00
ATOM   2812  HE2 PHE A 272      41.630  47.220  56.950  1.00  0.00
ATOM   2813  CZ  PHE A 272      42.930  48.870  56.970  1.00  0.00
ATOM   2814  HZ  PHE A 272      42.500  49.350  57.840  1.00  0.00
ATOM   2815  C   PHE A 272      45.810  44.380  55.120  1.00  0.00
ATOM   2816  O   PHE A 272      45.910  43.910  56.250  1.00  0.00
ATOM   2817  N   ALA A 273      45.640  43.690  54.000  1.00  0.00
ATOM   2818  H   ALA A 273      45.750  44.160  53.130  1.00  0.00
ATOM   2819  CA  ALA A 273      45.350  42.250  53.920  1.00  0.00
ATOM   2820  CB  ALA A 273      45.410  41.780  52.460  1.00  0.00
ATOM   2821  C   ALA A 273      46.140  41.230  54.740  1.00  0.00
ATOM   2822  O   ALA A 273      45.480  40.280  55.160  1.00  0.00
ATOM   2823  N   THR A 274      47.400  41.540  55.060  1.00  0.00
ATOM   2824  H   THR A 274      47.830  42.280  54.540  1.00  0.00
ATOM   2825  CA  THR A 274      48.320  40.720  55.860  1.00  0.00
ATOM   2826  CB  THR A 274      49.610  40.320  55.150  1.00  0.00
ATOM   2827  OG1 THR A 274      50.200  41.530  54.660  1.00  0.00
ATOM   2828  HG1 THR A 274      49.910  41.710  53.720  1.00  0.00
ATOM   2829  CG2 THR A 274      49.560  39.350  53.970  1.00  0.00
ATOM   2830  C   THR A 274      48.730  41.200  57.250  1.00  0.00
ATOM   2831  O   THR A 274      49.060  40.520  58.230  1.00  0.00
ATOM   2832  N   SER A 275      48.460  42.480  57.450  1.00  0.00
ATOM   2833  H   SER A 275      48.440  43.030  56.610  1.00  0.00
ATOM   2834  CA  SER A 275      48.760  43.180  58.710  1.00  0.00
ATOM   2835  CB  SER A 275      48.360  44.660  58.690  1.00  0.00
ATOM   2836  OG  SER A 275      46.940  44.840  58.650  1.00  0.00
ATOM   2837  HG  SER A 275      46.530  44.750  57.740  1.00  0.00
ATOM   2838  C   SER A 275      48.180  42.620  60.010  1.00  0.00
ATOM   2839  O   SER A 275      48.950  42.350  60.940  1.00  0.00
ATOM   2840  N   PHE A 276      46.920  42.220  59.910  1.00  0.00
ATOM   2841  H   PHE A 276      46.400  42.540  59.110  1.00  0.00
ATOM   2842  CA  PHE A 276      46.120  41.540  60.940  1.00  0.00
ATOM   2843  CB  PHE A 276      44.660  41.780  60.550  1.00  0.00
ATOM   2844  CG  PHE A 276      44.080  41.330  59.200  1.00  0.00
ATOM   2845  CD1 PHE A 276      43.730  40.010  58.970  1.00  0.00
ATOM   2846  HD1 PHE A 276      43.920  39.280  59.760  1.00  0.00
ATOM   2847  CD2 PHE A 276      44.000  42.280  58.190  1.00  0.00
ATOM   2848  HD2 PHE A 276      44.310  43.320  58.300  1.00  0.00
ATOM   2849  CE1 PHE A 276      43.270  39.640  57.710  1.00  0.00
ATOM   2850  HE1 PHE A 276      43.190  38.590  57.420  1.00  0.00
ATOM   2851  CE2 PHE A 276      43.450  41.900  56.970  1.00  0.00
ATOM   2852  HE2 PHE A 276      42.800  42.670  56.560  1.00  0.00
ATOM   2853  CZ  PHE A 276      43.110  40.580  56.700  1.00  0.00
ATOM   2854  HZ  PHE A 276      42.810  40.370  55.680  1.00  0.00
ATOM   2855  C   PHE A 276      46.290  40.070  61.290  1.00  0.00
ATOM   2856  O   PHE A 276      46.130  39.640  62.440  1.00  0.00
ATOM   2857  N   THR A 277      46.680  39.310  60.270  1.00  0.00
ATOM   2858  H   THR A 277      46.370  39.510  59.340  1.00  0.00
ATOM   2859  CA  THR A 277      47.440  38.060  60.410  1.00  0.00
ATOM   2860  CB  THR A 277      47.460  37.390  59.040  1.00  0.00
ATOM   2861  OG1 THR A 277      46.200  37.410  58.340  1.00  0.00
ATOM   2862  HG1 THR A 277      45.580  37.040  59.030  1.00  0.00
ATOM   2863  CG2 THR A 277      47.880  35.920  59.070  1.00  0.00
ATOM   2864  C   THR A 277      48.820  38.190  61.050  1.00  0.00
ATOM   2865  O   THR A 277      48.840  37.740  62.200  1.00  0.00
ATOM   2866  N   VAL A 278      49.790  38.920  60.510  1.00  0.00
ATOM   2867  H   VAL A 278      49.560  39.510  59.730  1.00  0.00
ATOM   2868  CA  VAL A 278      51.170  39.060  60.980  1.00  0.00
ATOM   2869  CB  VAL A 278      52.080  39.740  59.950  1.00  0.00
ATOM   2870  CG1 VAL A 278      52.200  38.950  58.640  1.00  0.00
ATOM   2871  CG2 VAL A 278      51.690  41.200  59.750  1.00  0.00
ATOM   2872  C   VAL A 278      51.340  39.630  62.390  1.00  0.00
ATOM   2873  O   VAL A 278      52.210  39.100  63.090  1.00  0.00
ATOM   2874  N   CYS A 279      50.430  40.470  62.860  1.00  0.00
ATOM   2875  H   CYS A 279      49.750  40.830  62.210  1.00  0.00
ATOM   2876  CA  CYS A 279      50.500  41.230  64.120  1.00  0.00
ATOM   2877  CB  CYS A 279      49.970  42.660  63.990  1.00  0.00
ATOM   2878  SG  CYS A 279      48.160  42.800  63.780  1.00  0.00
ATOM   2879  HG  CYS A 279      48.170  42.660  62.450  1.00  0.00
ATOM   2880  C   CYS A 279      49.840  40.560  65.320  1.00  0.00
ATOM   2881  O   CYS A 279      50.450  40.670  66.390  1.00  0.00
ATOM   2882  N   TRP A 280      48.860  39.700  65.090  1.00  0.00
ATOM   2883  H   TRP A 280      48.500  39.570  64.160  1.00  0.00
ATOM   2884  CA  TRP A 280      48.060  38.990  66.100  1.00  0.00
ATOM   2885  CB  TRP A 280      47.030  38.140  65.360  1.00  0.00
ATOM   2886  CG  TRP A 280      46.040  37.270  66.120  1.00  0.00
ATOM   2887  CD1 TRP A 280      46.110  35.940  66.050  1.00  0.00
ATOM   2888  HD1 TRP A 280      46.920  35.440  65.520  1.00  0.00
ATOM   2889  CD2 TRP A 280      44.950  37.650  66.900  1.00  0.00
ATOM   2890  NE1 TRP A 280      45.100  35.430  66.740  1.00  0.00
ATOM   2891  HE1 TRP A 280      45.060  34.450  66.960  1.00  0.00
ATOM   2892  CE2 TRP A 280      44.370  36.430  67.230  1.00  0.00
ATOM   2893  CE3 TRP A 280      44.290  38.870  67.000  1.00  0.00
ATOM   2894  HE3 TRP A 280      44.940  39.750  66.930  1.00  0.00
ATOM   2895  CZ2 TRP A 280      43.050  36.490  67.660  1.00  0.00
ATOM   2896  HZ2 TRP A 280      42.430  35.620  67.900  1.00  0.00
ATOM   2897  CZ3 TRP A 280      42.980  38.860  67.460  1.00  0.00
ATOM   2898  HZ3 TRP A 280      42.430  39.760  67.190  1.00  0.00
ATOM   2899  CH2 TRP A 280      42.340  37.680  67.800  1.00  0.00
ATOM   2900  HH2 TRP A 280      41.320  37.700  68.180  1.00  0.00
ATOM   2901  C   TRP A 280      48.730  38.230  67.250  1.00  0.00
ATOM   2902  O   TRP A 280      48.630  38.620  68.410  1.00  0.00
ATOM   2903  N   THR A 281      49.350  37.120  66.860  1.00  0.00
ATOM   2904  H   THR A 281      49.540  36.920  65.900  1.00  0.00
ATOM   2905  CA  THR A 281      50.120  36.420  67.900  1.00  0.00
ATOM   2906  CB  THR A 281      50.520  34.980  67.540  1.00  0.00
ATOM   2907  OG1 THR A 281      51.460  35.120  66.480  1.00  0.00
ATOM   2908  HG1 THR A 281      51.990  34.280  66.320  1.00  0.00
ATOM   2909  CG2 THR A 281      49.330  34.030  67.360  1.00  0.00
ATOM   2910  C   THR A 281      51.300  37.100  68.600  1.00  0.00
ATOM   2911  O   THR A 281      51.180  36.940  69.810  1.00  0.00
ATOM   2912  N   PRO A 282      51.990  38.020  67.930  1.00  0.00
ATOM   2913  CA  PRO A 282      52.890  39.010  68.550  1.00  0.00
ATOM   2914  CB  PRO A 282      53.270  39.990  67.440  1.00  0.00
ATOM   2915  CG  PRO A 282      53.550  39.020  66.290  1.00  0.00
ATOM   2916  CD  PRO A 282      52.510  37.930  66.560  1.00  0.00
ATOM   2917  C   PRO A 282      52.360  39.660  69.830  1.00  0.00
ATOM   2918  O   PRO A 282      53.030  39.680  70.860  1.00  0.00
ATOM   2919  N   TYR A 283      51.090  40.070  69.790  1.00  0.00
ATOM   2920  H   TYR A 283      50.560  40.140  68.950  1.00  0.00
ATOM   2921  CA  TYR A 283      50.460  40.750  70.930  1.00  0.00
ATOM   2922  CB  TYR A 283      49.350  41.550  70.240  1.00  0.00
ATOM   2923  CG  TYR A 283      48.210  42.000  71.140  1.00  0.00
ATOM   2924  CD1 TYR A 283      48.380  43.000  72.100  1.00  0.00
ATOM   2925  HD1 TYR A 283      49.310  43.550  72.250  1.00  0.00
ATOM   2926  CD2 TYR A 283      47.010  41.290  71.090  1.00  0.00
ATOM   2927  HD2 TYR A 283      46.800  40.810  70.140  1.00  0.00
ATOM   2928  CE1 TYR A 283      47.380  43.120  73.060  1.00  0.00
ATOM   2929  HE1 TYR A 283      47.320  43.930  73.790  1.00  0.00
ATOM   2930  CE2 TYR A 283      46.040  41.370  72.080  1.00  0.00
ATOM   2931  HE2 TYR A 283      45.140  40.750  71.990  1.00  0.00
ATOM   2932  CZ  TYR A 283      46.240  42.330  73.070  1.00  0.00
ATOM   2933  OH  TYR A 283      45.260  42.670  73.950  1.00  0.00
ATOM   2934  HH  TYR A 283      44.460  42.320  73.460  1.00  0.00
ATOM   2935  C   TYR A 283      50.080  39.920  72.160  1.00  0.00
ATOM   2936  O   TYR A 283      50.430  40.410  73.230  1.00  0.00
ATOM   2937  N   TYR A 284      49.430  38.770  72.040  1.00  0.00
ATOM   2938  H   TYR A 284      48.950  38.640  71.170  1.00  0.00
ATOM   2939  CA  TYR A 284      49.170  37.910  73.200  1.00  0.00
ATOM   2940  CB  TYR A 284      48.390  36.680  72.740  1.00  0.00
ATOM   2941  CG  TYR A 284      46.950  37.040  72.380  1.00  0.00
ATOM   2942  CD1 TYR A 284      46.660  37.360  71.060  1.00  0.00
ATOM   2943  HD1 TYR A 284      47.540  37.340  70.410  1.00  0.00
ATOM   2944  CD2 TYR A 284      45.980  37.100  73.380  1.00  0.00
ATOM   2945  HD2 TYR A 284      46.220  37.040  74.440  1.00  0.00
ATOM   2946  CE1 TYR A 284      45.390  37.760  70.670  1.00  0.00
ATOM   2947  HE1 TYR A 284      45.120  37.790  69.620  1.00  0.00
ATOM   2948  CE2 TYR A 284      44.680  37.430  73.020  1.00  0.00
ATOM   2949  HE2 TYR A 284      43.900  37.070  73.700  1.00  0.00
ATOM   2950  CZ  TYR A 284      44.450  37.770  71.700  1.00  0.00
ATOM   2951  OH  TYR A 284      43.150  38.070  71.440  1.00  0.00
ATOM   2952  HH  TYR A 284      43.210  38.180  70.440  1.00  0.00
ATOM   2953  C   TYR A 284      50.430  37.400  73.900  1.00  0.00
ATOM   2954  O   TYR A 284      50.290  37.330  75.120  1.00  0.00
ATOM   2955  N   VAL A 285      51.520  37.210  73.170  1.00  0.00
ATOM   2956  H   VAL A 285      51.610  37.070  72.180  1.00  0.00
ATOM   2957  CA  VAL A 285      52.720  36.700  73.850  1.00  0.00
ATOM   2958  CB  VAL A 285      53.620  36.210  72.700  1.00  0.00
ATOM   2959  CG1 VAL A 285      54.910  35.720  73.360  1.00  0.00
ATOM   2960  CG2 VAL A 285      53.080  34.930  72.070  1.00  0.00
ATOM   2961  C   VAL A 285      53.340  37.870  74.620  1.00  0.00
ATOM   2962  O   VAL A 285      53.460  37.910  75.840  1.00  0.00
ATOM   2963  N   LEU A 286      53.540  39.010  73.970  1.00  0.00
ATOM   2964  H   LEU A 286      53.600  39.040  72.980  1.00  0.00
ATOM   2965  CA  LEU A 286      54.030  40.190  74.700  1.00  0.00
ATOM   2966  CB  LEU A 286      54.270  41.340  73.720  1.00  0.00
ATOM   2967  CG  LEU A 286      55.630  41.180  73.050  1.00  0.00
ATOM   2968  CD1 LEU A 286      55.720  41.980  71.750  1.00  0.00
ATOM   2969  CD2 LEU A 286      56.670  41.400  74.150  1.00  0.00
ATOM   2970  C   LEU A 286      53.110  40.750  75.790  1.00  0.00
ATOM   2971  O   LEU A 286      53.560  41.270  76.820  1.00  0.00
ATOM   2972  N   GLY A 287      51.810  40.520  75.650  1.00  0.00
ATOM   2973  H   GLY A 287      51.360  40.360  74.770  1.00  0.00
ATOM   2974  CA  GLY A 287      50.840  40.720  76.740  1.00  0.00
ATOM   2975  C   GLY A 287      51.160  39.900  77.990  1.00  0.00
ATOM   2976  O   GLY A 287      51.570  40.390  79.040  1.00  0.00
ATOM   2977  N   ILE A 288      51.070  38.600  77.720  1.00  0.00
ATOM   2978  H   ILE A 288      50.980  38.230  76.790  1.00  0.00
ATOM   2979  CA  ILE A 288      51.320  37.580  78.750  1.00  0.00
ATOM   2980  CB  ILE A 288      50.960  36.160  78.310  1.00  0.00
ATOM   2981  CG1 ILE A 288      51.890  35.580  77.240  1.00  0.00
ATOM   2982  CG2 ILE A 288      49.480  36.170  77.930  1.00  0.00
ATOM   2983  CD  ILE A 288      51.670  34.060  77.200  1.00  0.00
ATOM   2984  C   ILE A 288      52.680  37.580  79.440  1.00  0.00
ATOM   2985  O   ILE A 288      52.780  36.990  80.520  1.00  0.00
ATOM   2986  N   TRP A 289      53.840  37.890  78.860  1.00  0.00
ATOM   2987  H   TRP A 289      53.970  37.830  77.870  1.00  0.00
ATOM   2988  CA  TRP A 289      55.060  38.280  79.570  1.00  0.00
ATOM   2989  CB  TRP A 289      56.080  38.220  78.430  1.00  0.00
ATOM   2990  CG  TRP A 289      56.420  36.900  77.750  1.00  0.00
ATOM   2991  CD1 TRP A 289      55.980  35.670  78.030  1.00  0.00
ATOM   2992  HD1 TRP A 289      55.390  35.350  78.890  1.00  0.00
ATOM   2993  CD2 TRP A 289      57.230  36.740  76.630  1.00  0.00
ATOM   2994  NE1 TRP A 289      56.550  34.780  77.230  1.00  0.00
ATOM   2995  HE1 TRP A 289      56.490  33.800  77.450  1.00  0.00
ATOM   2996  CE2 TRP A 289      57.250  35.390  76.280  1.00  0.00
ATOM   2997  CE3 TRP A 289      57.760  37.720  75.800  1.00  0.00
ATOM   2998  HE3 TRP A 289      57.990  38.720  76.190  1.00  0.00
ATOM   2999  CZ2 TRP A 289      57.770  34.890  75.090  1.00  0.00
ATOM   3000  HZ2 TRP A 289      57.880  33.820  74.930  1.00  0.00
ATOM   3001  CZ3 TRP A 289      58.290  37.240  74.620  1.00  0.00
ATOM   3002  HZ3 TRP A 289      58.720  37.900  73.850  1.00  0.00
ATOM   3003  CH2 TRP A 289      58.280  35.890  74.270  1.00  0.00
ATOM   3004  HH2 TRP A 289      58.640  35.610  73.280  1.00  0.00
ATOM   3005  C   TRP A 289      54.940  39.530  80.440  1.00  0.00
ATOM   3006  O   TRP A 289      55.390  39.450  81.580  1.00  0.00
ATOM   3007  N   TYR A 290      54.480  40.690  79.980  1.00  0.00
ATOM   3008  H   TYR A 290      54.060  40.680  79.080  1.00  0.00
ATOM   3009  CA  TYR A 290      54.340  41.950  80.730  1.00  0.00
ATOM   3010  CB  TYR A 290      53.790  42.940  79.710  1.00  0.00
ATOM   3011  CG  TYR A 290      53.470  44.350  80.220  1.00  0.00
ATOM   3012  CD1 TYR A 290      52.130  44.650  80.450  1.00  0.00
ATOM   3013  HD1 TYR A 290      51.360  44.080  79.920  1.00  0.00
ATOM   3014  CD2 TYR A 290      54.360  45.320  80.670  1.00  0.00
ATOM   3015  HD2 TYR A 290      55.420  45.100  80.650  1.00  0.00
ATOM   3016  CE1 TYR A 290      51.720  45.850  81.010  1.00  0.00
ATOM   3017  HE1 TYR A 290      50.630  45.880  81.080  1.00  0.00
ATOM   3018  CE2 TYR A 290      53.980  46.520  81.250  1.00  0.00
ATOM   3019  HE2 TYR A 290      54.730  47.290  81.430  1.00  0.00
ATOM   3020  CZ  TYR A 290      52.630  46.790  81.470  1.00  0.00
ATOM   3021  OH  TYR A 290      52.100  47.910  82.040  1.00  0.00
ATOM   3022  HH  TYR A 290      52.830  48.520  82.340  1.00  0.00
ATOM   3023  C   TYR A 290      53.540  41.940  82.040  1.00  0.00
ATOM   3024  O   TYR A 290      54.160  42.050  83.090  1.00  0.00
ATOM   3025  N   TRP A 291      52.280  41.510  81.980  1.00  0.00
ATOM   3026  H   TRP A 291      51.840  41.220  81.130  1.00  0.00
ATOM   3027  CA  TRP A 291      51.460  41.770  83.170  1.00  0.00
ATOM   3028  CB  TRP A 291      49.940  41.870  83.010  1.00  0.00
ATOM   3029  CG  TRP A 291      49.380  43.050  82.210  1.00  0.00
ATOM   3030  CD1 TRP A 291      49.120  44.250  82.700  1.00  0.00
ATOM   3031  HD1 TRP A 291      49.340  44.670  83.680  1.00  0.00
ATOM   3032  CD2 TRP A 291      48.740  42.950  80.980  1.00  0.00
ATOM   3033  NE1 TRP A 291      48.400  44.900  81.780  1.00  0.00
ATOM   3034  HE1 TRP A 291      48.300  45.890  81.770  1.00  0.00
ATOM   3035  CE2 TRP A 291      48.140  44.170  80.700  1.00  0.00
ATOM   3036  CE3 TRP A 291      48.620  41.990  79.980  1.00  0.00
ATOM   3037  HE3 TRP A 291      49.050  41.000  80.100  1.00  0.00
ATOM   3038  CZ2 TRP A 291      47.450  44.450  79.530  1.00  0.00
ATOM   3039  HZ2 TRP A 291      46.810  45.330  79.610  1.00  0.00
ATOM   3040  CZ3 TRP A 291      47.920  42.240  78.800  1.00  0.00
ATOM   3041  HZ3 TRP A 291      47.590  41.430  78.140  1.00  0.00
ATOM   3042  CH2 TRP A 291      47.340  43.470  78.540  1.00  0.00
ATOM   3043  HH2 TRP A 291      47.230  43.800  77.510  1.00  0.00
ATOM   3044  C   TRP A 291      51.630  40.890  84.410  1.00  0.00
ATOM   3045  O   TRP A 291      51.040  39.810  84.440  1.00  0.00
ATOM   3046  N   PHE A 292      52.770  41.160  85.040  1.00  0.00
ATOM   3047  H   PHE A 292      53.490  41.700  84.600  1.00  0.00
ATOM   3048  CA  PHE A 292      53.120  40.720  86.400  1.00  0.00
ATOM   3049  CB  PHE A 292      54.640  40.790  86.540  1.00  0.00
ATOM   3050  CG  PHE A 292      55.390  39.680  85.800  1.00  0.00
ATOM   3051  CD1 PHE A 292      55.670  38.450  86.370  1.00  0.00
ATOM   3052  HD1 PHE A 292      54.980  38.040  87.110  1.00  0.00
ATOM   3053  CD2 PHE A 292      56.280  40.150  84.830  1.00  0.00
ATOM   3054  HD2 PHE A 292      56.330  41.220  84.660  1.00  0.00
ATOM   3055  CE1 PHE A 292      56.810  37.730  86.020  1.00  0.00
ATOM   3056  HE1 PHE A 292      57.020  36.750  86.440  1.00  0.00
ATOM   3057  CE2 PHE A 292      57.340  39.390  84.350  1.00  0.00
ATOM   3058  HE2 PHE A 292      57.870  39.530  83.410  1.00  0.00
ATOM   3059  CZ  PHE A 292      57.560  38.150  84.930  1.00  0.00
ATOM   3060  HZ  PHE A 292      58.180  37.420  84.410  1.00  0.00
ATOM   3061  C   PHE A 292      52.460  41.620  87.450  1.00  0.00
ATOM   3062  O   PHE A 292      52.340  42.830  87.260  1.00  0.00
ATOM   3063  N   ASP A 293      52.130  41.040  88.600  1.00  0.00
ATOM   3064  H   ASP A 293      52.410  40.090  88.740  1.00  0.00
ATOM   3065  CA  ASP A 293      51.490  41.680  89.760  1.00  0.00
ATOM   3066  CB  ASP A 293      50.770  40.660  90.640  1.00  0.00
ATOM   3067  CG  ASP A 293      51.680  39.500  91.030  1.00  0.00
ATOM   3068  OD1 ASP A 293      52.090  39.490  92.210  1.00  0.00
ATOM   3069  OD2 ASP A 293      51.980  38.640  90.170  1.00  0.00
ATOM   3070  C   ASP A 293      52.290  42.790  90.450  1.00  0.00
ATOM   3071  O   ASP A 293      51.630  43.810  90.650  1.00  0.00
ATOM   3072  N   PRO A 294      53.560  42.670  90.790  1.00  0.00
ATOM   3073  CA  PRO A 294      54.260  43.660  91.620  1.00  0.00
ATOM   3074  CB  PRO A 294      55.550  42.970  92.070  1.00  0.00
ATOM   3075  CG  PRO A 294      55.780  41.730  91.200  1.00  0.00
ATOM   3076  CD  PRO A 294      54.380  41.450  90.660  1.00  0.00
ATOM   3077  C   PRO A 294      54.530  45.010  90.950  1.00  0.00
ATOM   3078  O   PRO A 294      55.250  45.050  89.960  1.00  0.00
ATOM   3079  N   GLU A 295      54.120  46.070  91.660  1.00  0.00
ATOM   3080  H   GLU A 295      53.910  45.950  92.630  1.00  0.00
ATOM   3081  CA  GLU A 295      54.010  47.470  91.240  1.00  0.00
ATOM   3082  CB  GLU A 295      55.400  48.110  91.300  1.00  0.00
ATOM   3083  CG  GLU A 295      55.470  49.620  91.090  1.00  0.00
ATOM   3084  CD  GLU A 295      56.930  49.980  91.360  1.00  0.00
ATOM   3085  OE1 GLU A 295      57.230  50.170  92.560  1.00  0.00
ATOM   3086  OE2 GLU A 295      57.730  50.100  90.410  1.00  0.00
ATOM   3087  C   GLU A 295      53.270  47.670  89.910  1.00  0.00
ATOM   3088  O   GLU A 295      53.770  47.970  88.830  1.00  0.00
ATOM   3089  N   MET A 296      51.990  48.000  90.050  1.00  0.00
ATOM   3090  H   MET A 296      51.550  47.910  90.950  1.00  0.00
ATOM   3091  CA  MET A 296      51.040  48.320  88.970  1.00  0.00
ATOM   3092  CB  MET A 296      49.770  47.480  89.020  1.00  0.00
ATOM   3093  CG  MET A 296      48.840  47.520  87.810  1.00  0.00
ATOM   3094  SD  MET A 296      49.230  46.160  86.650  1.00  0.00
ATOM   3095  CE  MET A 296      49.410  44.860  87.860  1.00  0.00
ATOM   3096  C   MET A 296      50.870  49.840  88.870  1.00  0.00
ATOM   3097  O   MET A 296      50.220  50.490  89.690  1.00  0.00
ATOM   3098  N   LEU A 297      51.670  50.440  87.990  1.00  0.00
ATOM   3099  H   LEU A 297      52.460  49.940  87.650  1.00  0.00
ATOM   3100  CA  LEU A 297      51.480  51.840  87.580  1.00  0.00
ATOM   3101  CB  LEU A 297      52.830  52.390  87.130  1.00  0.00
ATOM   3102  CG  LEU A 297      53.870  52.660  88.230  1.00  0.00
ATOM   3103  CD1 LEU A 297      55.170  53.160  87.590  1.00  0.00
ATOM   3104  CD2 LEU A 297      53.480  53.630  89.350  1.00  0.00
ATOM   3105  C   LEU A 297      50.400  52.120  86.540  1.00  0.00
ATOM   3106  O   LEU A 297      49.710  53.150  86.540  1.00  0.00
ATOM   3107  N   ASN A 298      50.390  51.240  85.540  1.00  0.00
ATOM   3108  H   ASN A 298      51.120  50.590  85.370  1.00  0.00
ATOM   3109  CA  ASN A 298      49.300  51.170  84.550  1.00  0.00
ATOM   3110  CB  ASN A 298      49.870  51.470  83.160  1.00  0.00
ATOM   3111  CG  ASN A 298      50.450  52.860  82.920  1.00  0.00
ATOM   3112  OD1 ASN A 298      49.870  53.790  82.360  1.00  0.00
ATOM   3113  ND2 ASN A 298      51.750  52.980  83.190  1.00  0.00
ATOM   3114 HD21 ASN A 298      52.210  52.180  83.580  1.00  0.00
ATOM   3115 HD22 ASN A 298      52.150  53.860  82.960  1.00  0.00
ATOM   3116  C   ASN A 298      48.450  49.910  84.440  1.00  0.00
ATOM   3117  O   ASN A 298      48.830  48.750  84.260  1.00  0.00
ATOM   3118  N   ARG A 299      47.150  50.170  84.340  1.00  0.00
ATOM   3119  H   ARG A 299      46.800  51.020  84.730  1.00  0.00
ATOM   3120  CA  ARG A 299      46.200  49.060  84.100  1.00  0.00
ATOM   3121  CB  ARG A 299      45.360  48.810  85.350  1.00  0.00
ATOM   3122  CG  ARG A 299      44.620  47.480  85.230  1.00  0.00
ATOM   3123  CD  ARG A 299      43.550  47.390  86.320  1.00  0.00
ATOM   3124  NE  ARG A 299      42.740  46.170  86.210  1.00  0.00
ATOM   3125  HE  ARG A 299      42.800  45.680  85.340  1.00  0.00
ATOM   3126  CZ  ARG A 299      41.970  45.710  87.200  1.00  0.00
ATOM   3127  NH1 ARG A 299      41.720  46.480  88.270  1.00  0.00
ATOM   3128 HH11 ARG A 299      42.000  47.440  88.280  1.00  0.00
ATOM   3129 HH12 ARG A 299      41.190  46.090  89.020  1.00  0.00
ATOM   3130  NH2 ARG A 299      41.080  44.720  87.060  1.00  0.00
ATOM   3131 HH21 ARG A 299      40.910  44.260  86.180  1.00  0.00
ATOM   3132 HH22 ARG A 299      40.570  44.530  87.900  1.00  0.00
ATOM   3133  C   ARG A 299      45.390  49.300  82.830  1.00  0.00
ATOM   3134  O   ARG A 299      44.170  49.490  82.930  1.00  0.00
ATOM   3135  N   LEU A 300      46.170  49.450  81.760  1.00  0.00
ATOM   3136  H   LEU A 300      46.910  48.780  81.720  1.00  0.00
ATOM   3137  CA  LEU A 300      45.670  49.750  80.410  1.00  0.00
ATOM   3138  CB  LEU A 300      46.930  50.250  79.690  1.00  0.00
ATOM   3139  CG  LEU A 300      46.730  50.940  78.340  1.00  0.00
ATOM   3140  CD1 LEU A 300      47.800  52.030  78.230  1.00  0.00
ATOM   3141  CD2 LEU A 300      46.860  49.970  77.170  1.00  0.00
ATOM   3142  C   LEU A 300      45.090  48.500  79.730  1.00  0.00
ATOM   3143  O   LEU A 300      45.650  47.410  79.730  1.00  0.00
ATOM   3144  N   SER A 301      43.790  48.590  79.470  1.00  0.00
ATOM   3145  H   SER A 301      43.320  49.380  79.850  1.00  0.00
ATOM   3146  CA  SER A 301      43.030  47.550  78.760  1.00  0.00
ATOM   3147  CB  SER A 301      42.060  46.810  79.690  1.00  0.00
ATOM   3148  OG  SER A 301      41.320  45.880  78.890  1.00  0.00
ATOM   3149  HG  SER A 301      41.790  45.020  78.700  1.00  0.00
ATOM   3150  C   SER A 301      42.340  48.060  77.490  1.00  0.00
ATOM   3151  O   SER A 301      42.480  47.460  76.420  1.00  0.00
ATOM   3152  N   ASP A 302      41.470  49.040  77.740  1.00  0.00
ATOM   3153  H   ASP A 302      41.250  49.320  78.670  1.00  0.00
ATOM   3154  CA  ASP A 302      40.570  49.490  76.680  1.00  0.00
ATOM   3155  CB  ASP A 302      39.690  50.530  77.380  1.00  0.00
ATOM   3156  CG  ASP A 302      38.760  49.880  78.400  1.00  0.00
ATOM   3157  OD1 ASP A 302      38.970  50.100  79.610  1.00  0.00
ATOM   3158  OD2 ASP A 302      37.940  49.060  77.920  1.00  0.00
ATOM   3159  C   ASP A 302      41.030  50.110  75.350  1.00  0.00
ATOM   3160  O   ASP A 302      40.270  49.910  74.400  1.00  0.00
ATOM   3161  N   PRO A 303      42.200  50.700  75.180  1.00  0.00
ATOM   3162  CA  PRO A 303      42.800  50.890  73.850  1.00  0.00
ATOM   3163  CB  PRO A 303      43.990  51.850  73.970  1.00  0.00
ATOM   3164  CG  PRO A 303      43.500  52.650  75.170  1.00  0.00
ATOM   3165  CD  PRO A 303      42.740  51.710  76.110  1.00  0.00
ATOM   3166  C   PRO A 303      43.160  49.570  73.180  1.00  0.00
ATOM   3167  O   PRO A 303      42.310  49.060  72.460  1.00  0.00
ATOM   3168  N   VAL A 304      44.190  48.880  73.660  1.00  0.00
ATOM   3169  H   VAL A 304      44.700  49.170  74.470  1.00  0.00
ATOM   3170  CA  VAL A 304      44.640  47.580  73.120  1.00  0.00
ATOM   3171  CB  VAL A 304      45.820  47.080  73.970  1.00  0.00
ATOM   3172  CG1 VAL A 304      46.960  48.090  73.890  1.00  0.00
ATOM   3173  CG2 VAL A 304      45.570  46.880  75.460  1.00  0.00
ATOM   3174  C   VAL A 304      43.620  46.470  72.910  1.00  0.00
ATOM   3175  O   VAL A 304      43.420  46.010  71.780  1.00  0.00
ATOM   3176  N   ASN A 305      42.770  46.260  73.900  1.00  0.00
ATOM   3177  H   ASN A 305      42.650  46.670  74.810  1.00  0.00
ATOM   3178  CA  ASN A 305      41.780  45.190  73.730  1.00  0.00
ATOM   3179  CB  ASN A 305      41.180  45.040  75.140  1.00  0.00
ATOM   3180  CG  ASN A 305      39.950  44.140  75.190  1.00  0.00
ATOM   3181  OD1 ASN A 305      39.760  43.170  74.460  1.00  0.00
ATOM   3182  ND2 ASN A 305      39.200  44.280  76.280  1.00  0.00
ATOM   3183 HD21 ASN A 305      39.310  45.060  76.910  1.00  0.00
ATOM   3184 HD22 ASN A 305      38.620  43.490  76.470  1.00  0.00
ATOM   3185  C   ASN A 305      40.880  45.330  72.510  1.00  0.00
ATOM   3186  O   ASN A 305      40.690  44.400  71.730  1.00  0.00
ATOM   3187  N   HIS A 306      40.070  46.390  72.550  1.00  0.00
ATOM   3188  H   HIS A 306      39.890  46.900  73.390  1.00  0.00
ATOM   3189  CA  HIS A 306      39.170  46.780  71.450  1.00  0.00
ATOM   3190  CB  HIS A 306      38.520  48.030  72.050  1.00  0.00
ATOM   3191  CG  HIS A 306      37.500  47.890  73.180  1.00  0.00
ATOM   3192  ND1 HIS A 306      36.930  46.800  73.700  1.00  0.00
ATOM   3193  CD2 HIS A 306      37.240  48.910  73.990  1.00  0.00
ATOM   3194  HD2 HIS A 306      36.610  49.720  73.610  1.00  0.00
ATOM   3195  CE1 HIS A 306      36.180  47.310  74.670  1.00  0.00
ATOM   3196  HE1 HIS A 306      35.260  46.910  75.100  1.00  0.00
ATOM   3197  NE2 HIS A 306      36.890  48.340  75.130  1.00  0.00
ATOM   3198  HE2 HIS A 306      37.070  48.510  76.100  1.00  0.00
ATOM   3199  C   HIS A 306      39.880  46.960  70.110  1.00  0.00
ATOM   3200  O   HIS A 306      39.390  46.580  69.050  1.00  0.00
ATOM   3201  N   PHE A 307      41.100  47.500  70.100  1.00  0.00
ATOM   3202  H   PHE A 307      41.350  48.170  70.800  1.00  0.00
ATOM   3203  CA  PHE A 307      41.990  47.560  68.940  1.00  0.00
ATOM   3204  CB  PHE A 307      43.280  48.290  69.330  1.00  0.00
ATOM   3205  CG  PHE A 307      43.830  49.210  68.240  1.00  0.00
ATOM   3206  CD1 PHE A 307      44.530  48.760  67.130  1.00  0.00
ATOM   3207  HD1 PHE A 307      44.450  47.690  66.960  1.00  0.00
ATOM   3208  CD2 PHE A 307      43.930  50.540  68.640  1.00  0.00
ATOM   3209  HD2 PHE A 307      43.230  50.930  69.390  1.00  0.00
ATOM   3210  CE1 PHE A 307      45.370  49.630  66.440  1.00  0.00
ATOM   3211  HE1 PHE A 307      46.140  49.110  65.870  1.00  0.00
ATOM   3212  CE2 PHE A 307      44.680  51.420  67.870  1.00  0.00
ATOM   3213  HE2 PHE A 307      44.940  52.350  68.380  1.00  0.00
ATOM   3214  CZ  PHE A 307      45.450  50.970  66.800  1.00  0.00
ATOM   3215  HZ  PHE A 307      46.400  51.480  66.700  1.00  0.00
ATOM   3216  C   PHE A 307      42.340  46.260  68.220  1.00  0.00
ATOM   3217  O   PHE A 307      42.080  46.220  67.020  1.00  0.00
ATOM   3218  N   PHE A 308      42.670  45.200  68.970  1.00  0.00
ATOM   3219  H   PHE A 308      42.680  45.230  69.970  1.00  0.00
ATOM   3220  CA  PHE A 308      42.930  43.900  68.330  1.00  0.00
ATOM   3221  CB  PHE A 308      43.790  43.040  69.260  1.00  0.00
ATOM   3222  CG  PHE A 308      45.220  43.530  69.010  1.00  0.00
ATOM   3223  CD1 PHE A 308      45.960  42.990  67.970  1.00  0.00
ATOM   3224  HD1 PHE A 308      45.470  42.170  67.440  1.00  0.00
ATOM   3225  CD2 PHE A 308      45.710  44.660  69.660  1.00  0.00
ATOM   3226  HD2 PHE A 308      45.260  44.990  70.590  1.00  0.00
ATOM   3227  CE1 PHE A 308      47.070  43.660  67.460  1.00  0.00
ATOM   3228  HE1 PHE A 308      47.500  43.350  66.500  1.00  0.00
ATOM   3229  CE2 PHE A 308      46.820  45.330  69.150  1.00  0.00
ATOM   3230  HE2 PHE A 308      47.210  46.230  69.640  1.00  0.00
ATOM   3231  CZ  PHE A 308      47.550  44.790  68.100  1.00  0.00
ATOM   3232  HZ  PHE A 308      48.630  44.930  68.040  1.00  0.00
ATOM   3233  C   PHE A 308      41.640  43.140  68.010  1.00  0.00
ATOM   3234  O   PHE A 308      41.510  42.420  67.020  1.00  0.00
ATOM   3235  N   PHE A 309      40.630  43.250  68.870  1.00  0.00
ATOM   3236  H   PHE A 309      40.800  43.510  69.820  1.00  0.00
ATOM   3237  CA  PHE A 309      39.330  42.640  68.590  1.00  0.00
ATOM   3238  CB  PHE A 309      38.300  42.980  69.660  1.00  0.00
ATOM   3239  CG  PHE A 309      37.090  42.040  69.590  1.00  0.00
ATOM   3240  CD1 PHE A 309      37.250  40.660  69.690  1.00  0.00
ATOM   3241  HD1 PHE A 309      38.240  40.270  69.450  1.00  0.00
ATOM   3242  CD2 PHE A 309      35.840  42.630  69.740  1.00  0.00
ATOM   3243  HD2 PHE A 309      35.800  43.710  69.930  1.00  0.00
ATOM   3244  CE1 PHE A 309      36.150  39.840  69.910  1.00  0.00
ATOM   3245  HE1 PHE A 309      36.230  38.770  70.070  1.00  0.00
ATOM   3246  CE2 PHE A 309      34.750  41.800  69.900  1.00  0.00
ATOM   3247  HE2 PHE A 309      33.750  42.230  69.850  1.00  0.00
ATOM   3248  CZ  PHE A 309      34.880  40.410  69.910  1.00  0.00
ATOM   3249  HZ  PHE A 309      33.990  39.790  69.960  1.00  0.00
ATOM   3250  C   PHE A 309      38.860  43.150  67.230  1.00  0.00
ATOM   3251  O   PHE A 309      38.340  42.430  66.370  1.00  0.00
ATOM   3252  N   LEU A 310      38.930  44.450  66.950  1.00  0.00
ATOM   3253  H   LEU A 310      39.070  45.110  67.690  1.00  0.00
ATOM   3254  CA  LEU A 310      38.680  44.920  65.580  1.00  0.00
ATOM   3255  CB  LEU A 310      39.030  46.410  65.530  1.00  0.00
ATOM   3256  CG  LEU A 310      37.860  47.370  65.330  1.00  0.00
ATOM   3257  CD1 LEU A 310      38.400  48.680  64.770  1.00  0.00
ATOM   3258  CD2 LEU A 310      36.910  46.870  64.230  1.00  0.00
ATOM   3259  C   LEU A 310      39.410  44.290  64.390  1.00  0.00
ATOM   3260  O   LEU A 310      38.790  43.910  63.400  1.00  0.00
ATOM   3261  N   PHE A 311      40.730  44.150  64.500  1.00  0.00
ATOM   3262  H   PHE A 311      41.120  44.140  65.420  1.00  0.00
ATOM   3263  CA  PHE A 311      41.460  43.340  63.510  1.00  0.00
ATOM   3264  CB  PHE A 311      42.970  43.280  63.740  1.00  0.00
ATOM   3265  CG  PHE A 311      43.650  44.650  63.590  1.00  0.00
ATOM   3266  CD1 PHE A 311      44.430  45.120  64.640  1.00  0.00
ATOM   3267  HD1 PHE A 311      44.050  45.170  65.660  1.00  0.00
ATOM   3268  CD2 PHE A 311      43.910  45.060  62.290  1.00  0.00
ATOM   3269  HD2 PHE A 311      43.230  44.950  61.450  1.00  0.00
ATOM   3270  CE1 PHE A 311      45.510  45.980  64.440  1.00  0.00
ATOM   3271  HE1 PHE A 311      46.140  46.270  65.270  1.00  0.00
ATOM   3272  CE2 PHE A 311      45.050  45.820  62.080  1.00  0.00
ATOM   3273  HE2 PHE A 311      45.220  46.190  61.070  1.00  0.00
ATOM   3274  CZ  PHE A 311      45.820  46.320  63.130  1.00  0.00
ATOM   3275  HZ  PHE A 311      46.660  46.980  62.900  1.00  0.00
ATOM   3276  C   PHE A 311      41.000  41.890  63.410  1.00  0.00
ATOM   3277  O   PHE A 311      41.180  41.290  62.350  1.00  0.00
ATOM   3278  N   ALA A 312      40.560  41.320  64.530  1.00  0.00
ATOM   3279  H   ALA A 312      40.790  41.720  65.410  1.00  0.00
ATOM   3280  CA  ALA A 312      39.950  39.990  64.620  1.00  0.00
ATOM   3281  CB  ALA A 312      39.590  39.640  66.070  1.00  0.00
ATOM   3282  C   ALA A 312      38.720  39.920  63.720  1.00  0.00
ATOM   3283  O   ALA A 312      38.530  38.940  62.990  1.00  0.00
ATOM   3284  N   PHE A 313      37.860  40.930  63.800  1.00  0.00
ATOM   3285  H   PHE A 313      37.870  41.500  64.620  1.00  0.00
ATOM   3286  CA  PHE A 313      36.640  40.820  62.980  1.00  0.00
ATOM   3287  CB  PHE A 313      35.430  41.350  63.750  1.00  0.00
ATOM   3288  CG  PHE A 313      34.500  40.370  64.470  1.00  0.00
ATOM   3289  CD1 PHE A 313      34.920  39.910  65.710  1.00  0.00
ATOM   3290  HD1 PHE A 313      35.980  39.830  65.930  1.00  0.00
ATOM   3291  CD2 PHE A 313      33.200  40.080  64.070  1.00  0.00
ATOM   3292  HD2 PHE A 313      33.030  40.370  63.030  1.00  0.00
ATOM   3293  CE1 PHE A 313      34.030  39.180  66.500  1.00  0.00
ATOM   3294  HE1 PHE A 313      34.450  38.820  67.440  1.00  0.00
ATOM   3295  CE2 PHE A 313      32.270  39.420  64.860  1.00  0.00
ATOM   3296  HE2 PHE A 313      31.300  39.080  64.480  1.00  0.00
ATOM   3297  CZ  PHE A 313      32.750  38.900  66.050  1.00  0.00
ATOM   3298  HZ  PHE A 313      32.180  38.280  66.750  1.00  0.00
ATOM   3299  C   PHE A 313      36.790  41.350  61.550  1.00  0.00
ATOM   3300  O   PHE A 313      36.080  40.890  60.660  1.00  0.00
ATOM   3301  N   LEU A 314      37.970  41.920  61.310  1.00  0.00
ATOM   3302  H   LEU A 314      38.520  42.110  62.120  1.00  0.00
ATOM   3303  CA  LEU A 314      38.460  42.380  60.010  1.00  0.00
ATOM   3304  CB  LEU A 314      39.660  43.310  60.250  1.00  0.00
ATOM   3305  CG  LEU A 314      39.660  44.340  59.130  1.00  0.00
ATOM   3306  CD1 LEU A 314      38.520  45.350  59.100  1.00  0.00
ATOM   3307  CD2 LEU A 314      41.030  45.020  59.250  1.00  0.00
ATOM   3308  C   LEU A 314      38.940  41.250  59.090  1.00  0.00
ATOM   3309  O   LEU A 314      38.580  41.230  57.920  1.00  0.00
ATOM   3310  N   ASN A 315      39.570  40.290  59.760  1.00  0.00
ATOM   3311  H   ASN A 315      40.240  40.460  60.480  1.00  0.00
ATOM   3312  CA  ASN A 315      39.910  39.030  59.070  1.00  0.00
ATOM   3313  CB  ASN A 315      40.620  38.080  60.030  1.00  0.00
ATOM   3314  CG  ASN A 315      40.820  36.640  59.560  1.00  0.00
ATOM   3315  OD1 ASN A 315      41.090  36.440  58.370  1.00  0.00
ATOM   3316  ND2 ASN A 315      40.600  35.720  60.490  1.00  0.00
ATOM   3317 HD21 ASN A 315      40.330  36.060  61.390  1.00  0.00
ATOM   3318 HD22 ASN A 315      40.530  34.760  60.200  1.00  0.00
ATOM   3319  C   ASN A 315      38.840  38.360  58.200  1.00  0.00
ATOM   3320  O   ASN A 315      39.270  38.090  57.080  1.00  0.00
ATOM   3321  N   PRO A 316      37.560  38.150  58.450  1.00  0.00
ATOM   3322  CA  PRO A 316      36.610  37.760  57.390  1.00  0.00
ATOM   3323  CB  PRO A 316      35.930  36.540  58.010  1.00  0.00
ATOM   3324  CG  PRO A 316      35.730  36.970  59.460  1.00  0.00
ATOM   3325  CD  PRO A 316      37.060  37.660  59.750  1.00  0.00
ATOM   3326  C   PRO A 316      35.730  38.900  56.880  1.00  0.00
ATOM   3327  O   PRO A 316      34.690  38.620  56.280  1.00  0.00
ATOM   3328  N   CYS A 317      36.170  40.150  57.000  1.00  0.00
ATOM   3329  H   CYS A 317      37.050  40.460  57.370  1.00  0.00
ATOM   3330  CA  CYS A 317      35.530  41.340  56.430  1.00  0.00
ATOM   3331  CB  CYS A 317      35.270  42.350  57.550  1.00  0.00
ATOM   3332  SG  CYS A 317      34.020  41.780  58.760  1.00  0.00
ATOM   3333  HG  CYS A 317      35.010  41.060  59.280  1.00  0.00
ATOM   3334  C   CYS A 317      36.160  42.140  55.290  1.00  0.00
ATOM   3335  O   CYS A 317      35.420  42.790  54.540  1.00  0.00
ATOM   3336  N   PHE A 318      37.420  41.880  54.970  1.00  0.00
ATOM   3337  H   PHE A 318      37.770  41.000  55.290  1.00  0.00
ATOM   3338  CA  PHE A 318      38.250  42.670  54.050  1.00  0.00
ATOM   3339  CB  PHE A 318      39.720  42.310  54.290  1.00  0.00
ATOM   3340  CG  PHE A 318      40.640  42.980  53.270  1.00  0.00
ATOM   3341  CD1 PHE A 318      41.050  42.170  52.220  1.00  0.00
ATOM   3342  HD1 PHE A 318      40.770  41.110  52.220  1.00  0.00
ATOM   3343  CD2 PHE A 318      40.980  44.320  53.430  1.00  0.00
ATOM   3344  HD2 PHE A 318      40.430  44.940  54.130  1.00  0.00
ATOM   3345  CE1 PHE A 318      41.970  42.710  51.320  1.00  0.00
ATOM   3346  HE1 PHE A 318      42.290  42.220  50.410  1.00  0.00
ATOM   3347  CE2 PHE A 318      41.970  44.780  52.570  1.00  0.00
ATOM   3348  HE2 PHE A 318      42.350  45.790  52.740  1.00  0.00
ATOM   3349  CZ  PHE A 318      42.510  43.960  51.590  1.00  0.00
ATOM   3350  HZ  PHE A 318      43.100  44.380  50.780  1.00  0.00
ATOM   3351  C   PHE A 318      37.760  42.540  52.600  1.00  0.00
ATOM   3352  O   PHE A 318      37.230  43.440  51.970  1.00  0.00
ATOM   3353  N   ASP A 319      37.670  41.280  52.180  1.00  0.00
ATOM   3354  H   ASP A 319      37.730  40.510  52.820  1.00  0.00
ATOM   3355  CA  ASP A 319      37.250  40.800  50.860  1.00  0.00
ATOM   3356  CB  ASP A 319      37.350  39.280  50.830  1.00  0.00
ATOM   3357  CG  ASP A 319      38.830  38.890  50.860  1.00  0.00
ATOM   3358  OD1 ASP A 319      39.390  38.730  51.960  1.00  0.00
ATOM   3359  OD2 ASP A 319      39.450  38.600  49.810  1.00  0.00
ATOM   3360  C   ASP A 319      35.820  41.120  50.420  1.00  0.00
ATOM   3361  O   ASP A 319      35.550  41.030  49.220  1.00  0.00
ATOM   3362  N   PRO A 320      34.960  41.360  51.410  1.00  0.00
ATOM   3363  CA  PRO A 320      33.750  42.070  50.960  1.00  0.00
ATOM   3364  CB  PRO A 320      32.680  41.760  52.010  1.00  0.00
ATOM   3365  CG  PRO A 320      33.150  40.400  52.530  1.00  0.00
ATOM   3366  CD  PRO A 320      34.680  40.400  52.490  1.00  0.00
ATOM   3367  C   PRO A 320      34.050  43.560  50.850  1.00  0.00
ATOM   3368  O   PRO A 320      33.840  44.180  49.810  1.00  0.00
ATOM   3369  N   LEU A 321      34.370  44.150  52.000  1.00  0.00
ATOM   3370  H   LEU A 321      34.590  43.660  52.850  1.00  0.00
ATOM   3371  CA  LEU A 321      34.590  45.570  52.290  1.00  0.00
ATOM   3372  CB  LEU A 321      35.480  45.830  53.510  1.00  0.00
ATOM   3373  CG  LEU A 321      34.550  46.220  54.660  1.00  0.00
ATOM   3374  CD1 LEU A 321      35.360  45.980  55.930  1.00  0.00
ATOM   3375  CD2 LEU A 321      34.400  47.720  54.420  1.00  0.00
ATOM   3376  C   LEU A 321      35.280  46.350  51.170  1.00  0.00
ATOM   3377  O   LEU A 321      34.970  47.540  51.090  1.00  0.00
ATOM   3378  N   ILE A 322      36.160  45.700  50.410  1.00  0.00
ATOM   3379  H   ILE A 322      36.720  44.960  50.770  1.00  0.00
ATOM   3380  CA  ILE A 322      36.840  46.430  49.340  1.00  0.00
ATOM   3381  CB  ILE A 322      38.300  45.980  49.220  1.00  0.00
ATOM   3382  CG1 ILE A 322      38.410  44.450  49.130  1.00  0.00
ATOM   3383  CG2 ILE A 322      39.050  46.460  50.460  1.00  0.00
ATOM   3384  CD  ILE A 322      39.770  43.770  48.960  1.00  0.00
ATOM   3385  C   ILE A 322      36.130  46.400  47.980  1.00  0.00
ATOM   3386  O   ILE A 322      36.590  46.950  46.980  1.00  0.00
ATOM   3387  N   TYR A 323      35.170  45.520  47.700  1.00  0.00
ATOM   3388  H   TYR A 323      34.590  45.210  48.450  1.00  0.00
ATOM   3389  CA  TYR A 323      34.430  45.590  46.440  1.00  0.00
ATOM   3390  CB  TYR A 323      34.020  44.230  45.870  1.00  0.00
ATOM   3391  CG  TYR A 323      35.000  43.370  45.060  1.00  0.00
ATOM   3392  CD1 TYR A 323      36.040  42.790  45.770  1.00  0.00
ATOM   3393  HD1 TYR A 323      35.930  42.690  46.850  1.00  0.00
ATOM   3394  CD2 TYR A 323      34.900  43.330  43.680  1.00  0.00
ATOM   3395  HD2 TYR A 323      34.020  43.530  43.060  1.00  0.00
ATOM   3396  CE1 TYR A 323      37.090  42.220  45.050  1.00  0.00
ATOM   3397  HE1 TYR A 323      37.800  41.650  45.660  1.00  0.00
ATOM   3398  CE2 TYR A 323      35.890  42.660  42.960  1.00  0.00
ATOM   3399  HE2 TYR A 323      35.660  42.670  41.900  1.00  0.00
ATOM   3400  CZ  TYR A 323      36.980  42.170  43.670  1.00  0.00
ATOM   3401  OH  TYR A 323      37.870  41.400  42.980  1.00  0.00
ATOM   3402  HH  TYR A 323      38.350  40.820  43.640  1.00  0.00
ATOM   3403  C   TYR A 323      33.260  46.580  46.410  1.00  0.00
ATOM   3404  O   TYR A 323      32.270  46.440  47.130  1.00  0.00
ATOM   3405  N   GLY A 324      33.340  47.580  45.530  1.00  0.00
ATOM   3406  H   GLY A 324      34.050  47.530  44.830  1.00  0.00
ATOM   3407  CA  GLY A 324      32.320  48.630  45.390  1.00  0.00
ATOM   3408  C   GLY A 324      33.090  49.930  45.170  1.00  0.00
ATOM   3409  O   GLY A 324      33.570  50.190  44.070  1.00  0.00
ATOM   3410  N   TYR A 325      33.430  50.660  46.230  1.00  0.00
ATOM   3411  H   TYR A 325      33.470  50.270  47.150  1.00  0.00
ATOM   3412  CA  TYR A 325      34.220  51.900  46.170  1.00  0.00
ATOM   3413  CB  TYR A 325      34.340  52.480  47.590  1.00  0.00
ATOM   3414  CG  TYR A 325      34.340  54.010  47.660  1.00  0.00
ATOM   3415  CD1 TYR A 325      33.180  54.670  47.280  1.00  0.00
ATOM   3416  HD1 TYR A 325      32.310  54.140  46.890  1.00  0.00
ATOM   3417  CD2 TYR A 325      35.470  54.760  47.950  1.00  0.00
ATOM   3418  HD2 TYR A 325      36.250  54.280  48.530  1.00  0.00
ATOM   3419  CE1 TYR A 325      33.220  56.050  47.100  1.00  0.00
ATOM   3420  HE1 TYR A 325      32.300  56.580  46.890  1.00  0.00
ATOM   3421  CE2 TYR A 325      35.510  56.140  47.790  1.00  0.00
ATOM   3422  HE2 TYR A 325      36.440  56.640  48.050  1.00  0.00
ATOM   3423  CZ  TYR A 325      34.380  56.780  47.280  1.00  0.00
ATOM   3424  OH  TYR A 325      34.480  58.010  46.690  1.00  0.00
ATOM   3425  HH  TYR A 325      35.240  58.380  47.230  1.00  0.00
ATOM   3426  C   TYR A 325      35.560  51.680  45.470  1.00  0.00
ATOM   3427  O   TYR A 325      35.810  52.260  44.420  1.00  0.00
ATOM   3428  N   PHE A 326      36.460  50.980  46.170  1.00  0.00
ATOM   3429  H   PHE A 326      36.340  50.700  47.120  1.00  0.00
ATOM   3430  CA  PHE A 326      37.800  50.560  45.740  1.00  0.00
ATOM   3431  CB  PHE A 326      38.490  49.830  46.900  1.00  0.00
ATOM   3432  CG  PHE A 326      38.530  50.660  48.180  1.00  0.00
ATOM   3433  CD1 PHE A 326      39.150  51.900  48.310  1.00  0.00
ATOM   3434  HD1 PHE A 326      39.960  52.070  47.610  1.00  0.00
ATOM   3435  CD2 PHE A 326      37.610  50.290  49.150  1.00  0.00
ATOM   3436  HD2 PHE A 326      36.970  49.420  49.010  1.00  0.00
ATOM   3437  CE1 PHE A 326      38.860  52.830  49.300  1.00  0.00
ATOM   3438  HE1 PHE A 326      39.250  53.850  49.340  1.00  0.00
ATOM   3439  CE2 PHE A 326      37.350  51.130  50.240  1.00  0.00
ATOM   3440  HE2 PHE A 326      36.810  50.680  51.070  1.00  0.00
ATOM   3441  CZ  PHE A 326      38.010  52.350  50.300  1.00  0.00
ATOM   3442  HZ  PHE A 326      37.760  52.990  51.140  1.00  0.00
ATOM   3443  C   PHE A 326      37.810  49.700  44.470  1.00  0.00
ATOM   3444  O   PHE A 326      37.690  48.480  44.550  1.00  0.00
ATOM   3445  N   SER A 327      38.160  50.400  43.400  1.00  0.00
ATOM   3446  H   SER A 327      38.500  51.340  43.340  1.00  0.00
ATOM   3447  CA  SER A 327      37.910  49.760  42.100  1.00  0.00
ATOM   3448  CB  SER A 327      36.560  49.990  41.410  1.00  0.00
ATOM   3449  OG  SER A 327      35.410  49.710  42.210  1.00  0.00
ATOM   3450  HG  SER A 327      35.290  50.450  42.870  1.00  0.00
ATOM   3451  C   SER A 327      39.040  50.130  41.140  1.00  0.00
ATOM   3452  O   SER A 327      39.300  51.320  40.980  1.00  0.00
ATOM   3453  N   LEU A 328      39.640  49.070  40.600  1.00  0.00
ATOM   3454  H   LEU A 328      39.510  48.170  41.010  1.00  0.00
ATOM   3455  CA  LEU A 328      40.710  49.210  39.620  1.00  0.00
ATOM   3456  CB  LEU A 328      41.970  49.900  40.150  1.00  0.00
ATOM   3457  CG  LEU A 328      43.030  50.270  39.110  1.00  0.00
ATOM   3458  CD1 LEU A 328      42.430  51.050  37.940  1.00  0.00
ATOM   3459  CD2 LEU A 328      44.250  50.930  39.760  1.00  0.00
ATOM   3460  C   LEU A 328      41.130  47.830  39.090  1.00  0.00
ATOM   3461  O1  LEU A 328      40.880  46.770  39.690  1.00  0.00
ATOM   3462  O2  LEU A 328      41.300  47.750  37.860  1.00  0.00
ATOM   3463  C33 DPP B 329      13.660  10.932  91.730  1.00  0.00
ATOM   3464  C34 DPP B 329      15.760   9.862  91.290  1.00  0.00
ATOM   3465  C35 DPP B 329      14.250  10.502  89.480  1.00  0.00
ATOM   3466  N   DPP B 329      14.800  10.862  90.800  1.00  0.00
ATOM   3467  C32 DPP B 329      15.390  12.202  90.880  1.00  0.00
ATOM   3468  C31 DPP B 329      16.460  12.532  89.840  1.00  0.00
ATOM   3469  O32 DPP B 329      17.490  11.562  89.630  1.00  0.00
ATOM   3470  P   DPP B 329      18.660  11.852  88.560  1.00  0.00
ATOM   3471  O33 DPP B 329      19.550  10.672  88.480  1.00  0.00
ATOM   3472  O34 DPP B 329      19.210  13.152  89.010  1.00  0.00
ATOM   3473  O31 DPP B 329      17.740  11.822  87.240  1.00  0.00
ATOM   3474  C3  DPP B 329      18.150  12.492  86.050  1.00  0.00
ATOM   3475  C2  DPP B 329      17.500  12.132  84.710  1.00  0.00
ATOM   3476  O21 DPP B 329      18.370  12.592  83.680  1.00  0.00
ATOM   3477  C21 DPP B 329      19.440  11.882  83.300  1.00  0.00
ATOM   3478  O22 DPP B 329      19.790  10.772  83.690  1.00  0.00
ATOM   3479  C22 DPP B 329      20.160  12.802  82.400  1.00  0.00
ATOM   3480  C23 DPP B 329      20.540  12.072  81.110  1.00  0.00
ATOM   3481  C24 DPP B 329      21.460  12.992  80.300  1.00  0.00
ATOM   3482  C25 DPP B 329      20.760  13.982  79.370  1.00  0.00
ATOM   3483  C26 DPP B 329      21.830  14.652  78.510  1.00  0.00
ATOM   3484  C27 DPP B 329      22.250  13.932  77.230  1.00  0.00
ATOM   3485  C28 DPP B 329      23.370  14.662  76.480  1.00  0.00
ATOM   3486  C29 DPP B 329      23.850  14.132  75.120  1.00  0.00
ATOM   3487 C210 DPP B 329      22.790  14.222  74.030  1.00  0.00
ATOM   3488 C211 DPP B 329      23.550  13.962  72.730  1.00  0.00
ATOM   3489 C212 DPP B 329      22.520  13.322  71.790  1.00  0.00
ATOM   3490 C213 DPP B 329      22.820  13.332  70.290  1.00  0.00
ATOM   3491 C214 DPP B 329      21.700  12.552  69.600  1.00  0.00
ATOM   3492 C215 DPP B 329      21.820  12.802  68.100  1.00  0.00
ATOM   3493 C216 DPP B 329      22.890  11.852  67.550  1.00  0.00
ATOM   3494  C1  DPP B 329      16.050  12.592  84.500  1.00  0.00
ATOM   3495  O11 DPP B 329      15.550  12.092  83.250  1.00  0.00
ATOM   3496  C11 DPP B 329      14.560  12.782  82.690  1.00  0.00
ATOM   3497  O12 DPP B 329      14.170  13.892  83.050  1.00  0.00
ATOM   3498  C12 DPP B 329      13.940  11.952  81.630  1.00  0.00
ATOM   3499  C13 DPP B 329      14.310  12.222  80.180  1.00  0.00
ATOM   3500  C14 DPP B 329      13.850  11.042  79.320  1.00  0.00
ATOM   3501  C15 DPP B 329      14.230  11.572  77.930  1.00  0.00
ATOM   3502  C16 DPP B 329      13.930  10.552  76.830  1.00  0.00
ATOM   3503  C17 DPP B 329      14.280  11.092  75.440  1.00  0.00
ATOM   3504  C18 DPP B 329      13.750  10.272  74.260  1.00  0.00
ATOM   3505  C19 DPP B 329      13.950  11.062  72.960  1.00  0.00
ATOM   3506 C110 DPP B 329      13.360  10.152  71.870  1.00  0.00
ATOM   3507 C111 DPP B 329      13.380  10.612  70.410  1.00  0.00
ATOM   3508 C112 DPP B 329      13.010   9.402  69.550  1.00  0.00
ATOM   3509 C113 DPP B 329      13.300   9.712  68.080  1.00  0.00
ATOM   3510 C114 DPP B 329      12.370  10.822  67.590  1.00  0.00
ATOM   3511 C115 DPP B 329      12.410  10.922  66.060  1.00  0.00
ATOM   3512 C116 DPP B 329      11.290  11.742  65.430  1.00  0.00
ATOM   3513  C33 DPP C 330      14.430  72.620  91.350  1.00  0.00
ATOM   3514  C34 DPP C 330      16.410  71.560  90.610  1.00  0.00
ATOM   3515  C35 DPP C 330      15.420  73.500  89.380  1.00  0.00
ATOM   3516  N   DPP C 330      15.710  72.850  90.670  1.00  0.00
ATOM   3517  C32 DPP C 330      16.430  73.700  91.620  1.00  0.00
ATOM   3518  C31 DPP C 330      17.530  74.590  91.030  1.00  0.00
ATOM   3519  O32 DPP C 330      18.550  73.960  90.250  1.00  0.00
ATOM   3520  P   DPP C 330      19.730  74.870  89.640  1.00  0.00
ATOM   3521  O33 DPP C 330      20.970  74.100  89.400  1.00  0.00
ATOM   3522  O34 DPP C 330      19.740  76.220  90.240  1.00  0.00
ATOM   3523  O31 DPP C 330      18.970  75.070  88.240  1.00  0.00
ATOM   3524  C3  DPP C 330      19.390  74.280  87.120  1.00  0.00
ATOM   3525  C2  DPP C 330      18.510  74.210  85.870  1.00  0.00
ATOM   3526  O21 DPP C 330      18.440  75.440  85.140  1.00  0.00
ATOM   3527  C21 DPP C 330      19.490  75.730  84.380  1.00  0.00
ATOM   3528  O22 DPP C 330      20.400  74.940  84.120  1.00  0.00
ATOM   3529  C22 DPP C 330      19.320   0.002  83.680  1.00  0.00
ATOM   3530  C23 DPP C 330      18.610   0.022  82.320  1.00  0.00
ATOM   3531  C24 DPP C 330      17.160  76.590  82.290  1.00  0.00
ATOM   3532  C25 DPP C 330      16.450   0.312  81.170  1.00  0.00
ATOM   3533  C26 DPP C 330      16.910  76.960  79.760  1.00  0.00
ATOM   3534  C27 DPP C 330      16.110   0.692  78.700  1.00  0.00
ATOM   3535  C28 DPP C 330      16.670   0.422  77.300  1.00  0.00
ATOM   3536  C29 DPP C 330      15.980   1.262  76.220  1.00  0.00
ATOM   3537 C210 DPP C 330      16.750   0.922  74.940  1.00  0.00
ATOM   3538 C211 DPP C 330      16.490   1.982  73.860  1.00  0.00
ATOM   3539 C212 DPP C 330      17.270   1.702  72.570  1.00  0.00
ATOM   3540 C213 DPP C 330      16.500   1.972  71.280  1.00  0.00
ATOM   3541 C214 DPP C 330      17.380   1.842  70.040  1.00  0.00
ATOM   3542 C215 DPP C 330      16.770   2.042  68.650  1.00  0.00
ATOM   3543 C216 DPP C 330      17.880   1.892  67.610  1.00  0.00
ATOM   3544  C1  DPP C 330      17.110  73.710  86.200  1.00  0.00
ATOM   3545  O11 DPP C 330      16.350  73.670  84.990  1.00  0.00
ATOM   3546  C11 DPP C 330      15.150  73.090  84.920  1.00  0.00
ATOM   3547  O12 DPP C 330      14.650  72.670  85.960  1.00  0.00
ATOM   3548  C12 DPP C 330      14.350  73.550  83.760  1.00  0.00
ATOM   3549  C13 DPP C 330      13.090  74.290  84.190  1.00  0.00
ATOM   3550  C14 DPP C 330      12.700  75.350  83.140  1.00  0.00
ATOM   3551  C15 DPP C 330      12.760  74.890  81.680  1.00  0.00
ATOM   3552  C16 DPP C 330      12.400  75.990  80.680  1.00  0.00
ATOM   3553  C17 DPP C 330      12.580  75.480  79.250  1.00  0.00
ATOM   3554  C18 DPP C 330      12.360  76.580  78.210  1.00  0.00
ATOM   3555  C19 DPP C 330      12.670  76.000  76.830  1.00  0.00
ATOM   3556 C110 DPP C 330      12.190   0.022  75.820  1.00  0.00
ATOM   3557 C111 DPP C 330      12.480  76.590  74.390  1.00  0.00
ATOM   3558 C112 DPP C 330      12.300   0.572  73.250  1.00  0.00
ATOM   3559 C113 DPP C 330      12.830   0.062  71.910  1.00  0.00
ATOM   3560 C114 DPP C 330      12.350   0.912  70.740  1.00  0.00
ATOM   3561 C115 DPP C 330      10.890   0.782  70.280  1.00  0.00
ATOM   3562 C116 DPP C 330      10.850   1.512  68.940  1.00  0.00
ATOM   3563  C33 DPP D 331       9.200  75.240  89.700  1.00  0.00
ATOM   3564  C34 DPP D 331       8.340  76.970  88.330  1.00  0.00
ATOM   3565  C35 DPP D 331       7.400  76.850  90.330  1.00  0.00
ATOM   3566  N   DPP D 331       8.720  76.630  89.710  1.00  0.00
ATOM   3567  C32 DPP D 331       9.580   0.552  90.420  1.00  0.00
ATOM   3568  C31 DPP D 331      10.270   0.162  91.730  1.00  0.00
ATOM   3569  O32 DPP D 331      11.450  76.480  91.350  1.00  0.00
ATOM   3570  P   DPP D 331      12.830   0.192  90.970  1.00  0.00
ATOM   3571  O33 DPP D 331      13.930  76.250  91.150  1.00  0.00
ATOM   3572  O34 DPP D 331      12.880   1.432  91.780  1.00  0.00
ATOM   3573  O31 DPP D 331      12.620   0.612  89.430  1.00  0.00
ATOM   3574  C3  DPP D 331      12.840  76.600  88.470  1.00  0.00
ATOM   3575  C2  DPP D 331      12.840  76.930  86.980  1.00  0.00
ATOM   3576  O21 DPP D 331      13.600   1.102  86.850  1.00  0.00
ATOM   3577  C21 DPP D 331      14.620   1.262  86.010  1.00  0.00
ATOM   3578  O22 DPP D 331      15.290   0.312  85.640  1.00  0.00
ATOM   3579  C22 DPP D 331      15.060   2.682  85.950  1.00  0.00
ATOM   3580  C23 DPP D 331      14.600   3.372  84.670  1.00  0.00
ATOM   3581  C24 DPP D 331      15.160   2.942  83.310  1.00  0.00
ATOM   3582  C25 DPP D 331      14.350   3.412  82.090  1.00  0.00
ATOM   3583  C26 DPP D 331      14.550   4.902  81.840  1.00  0.00
ATOM   3584  C27 DPP D 331      13.950   5.172  80.460  1.00  0.00
ATOM   3585  C28 DPP D 331      14.150   6.602  79.960  1.00  0.00
ATOM   3586  C29 DPP D 331      13.450   6.782  78.620  1.00  0.00
ATOM   3587 C210 DPP D 331      14.030   6.112  77.370  1.00  0.00
ATOM   3588 C211 DPP D 331      12.970   6.102  76.270  1.00  0.00
ATOM   3589 C212 DPP D 331      13.700   5.542  75.050  1.00  0.00
ATOM   3590 C213 DPP D 331      12.670   5.702  73.930  1.00  0.00
ATOM   3591 C214 DPP D 331      13.210   5.222  72.590  1.00  0.00
ATOM   3592 C215 DPP D 331      12.360   5.622  71.380  1.00  0.00
ATOM   3593 C216 DPP D 331      12.980   5.032  70.110  1.00  0.00
ATOM   3594  C1  DPP D 331      11.420   0.262  86.540  1.00  0.00
ATOM   3595  O11 DPP D 331      11.390   0.822  85.230  1.00  0.00
ATOM   3596  C11 DPP D 331      10.200   0.922  84.630  1.00  0.00
ATOM   3597  O12 DPP D 331       9.140   0.552  85.120  1.00  0.00
ATOM   3598  C12 DPP D 331      10.390   1.602  83.330  1.00  0.00
ATOM   3599  C13 DPP D 331       9.470   1.402  82.130  1.00  0.00
ATOM   3600  C14 DPP D 331       9.730   2.152  80.820  1.00  0.00
ATOM   3601  C15 DPP D 331       8.730   1.882  79.690  1.00  0.00
ATOM   3602  C16 DPP D 331       9.240   2.592  78.440  1.00  0.00
ATOM   3603  C17 DPP D 331       8.240   2.692  77.280  1.00  0.00
ATOM   3604  C18 DPP D 331       8.890   3.192  75.990  1.00  0.00
ATOM   3605  C19 DPP D 331       7.870   3.162  74.850  1.00  0.00
ATOM   3606 C110 DPP D 331       8.530   3.682  73.570  1.00  0.00
ATOM   3607 C111 DPP D 331       7.500   4.162  72.550  1.00  0.00
ATOM   3608 C112 DPP D 331       8.090   4.452  71.180  1.00  0.00
ATOM   3609 C113 DPP D 331       7.000   4.592  70.110  1.00  0.00
ATOM   3610 C114 DPP D 331       7.390   5.622  69.040  1.00  0.00
ATOM   3611 C115 DPP D 331       6.140   5.972  68.240  1.00  0.00
ATOM   3612 C116 DPP D 331       5.640   4.712  67.520  1.00  0.00
ATOM   3613  C33 DPP E 332      18.450  17.482  89.330  1.00  0.00
ATOM   3614  C34 DPP E 332      19.590  15.882  88.270  1.00  0.00
ATOM   3615  C35 DPP E 332      17.400  16.132  87.670  1.00  0.00
ATOM   3616  N   DPP E 332      18.600  16.922  87.980  1.00  0.00
ATOM   3617  C32 DPP E 332      18.880  17.902  86.920  1.00  0.00
ATOM   3618  C31 DPP E 332      20.300  18.462  86.810  1.00  0.00
ATOM   3619  O32 DPP E 332      20.500  19.592  87.660  1.00  0.00
ATOM   3620  P   DPP E 332      21.940  20.212  88.040  1.00  0.00
ATOM   3621  O33 DPP E 332      22.890  19.112  88.280  1.00  0.00
ATOM   3622  O34 DPP E 332      21.890  21.222  89.120  1.00  0.00
ATOM   3623  O31 DPP E 332      22.380  21.022  86.710  1.00  0.00
ATOM   3624  C3  DPP E 332      21.610  22.082  86.160  1.00  0.00
ATOM   3625  C2  DPP E 332      22.450  22.732  85.060  1.00  0.00
ATOM   3626  O21 DPP E 332      22.320  24.152  85.090  1.00  0.00
ATOM   3627  C21 DPP E 332      23.410  24.892  84.880  1.00  0.00
ATOM   3628  O22 DPP E 332      24.540  24.432  84.760  1.00  0.00
ATOM   3629  C22 DPP E 332      23.110  26.342  84.900  1.00  0.00
ATOM   3630  C23 DPP E 332      23.860  27.112  83.820  1.00  0.00
ATOM   3631  C24 DPP E 332      23.550  28.592  84.060  1.00  0.00
ATOM   3632  C25 DPP E 332      24.320  29.672  83.290  1.00  0.00
ATOM   3633  C26 DPP E 332      24.450  29.452  81.790  1.00  0.00
ATOM   3634  C27 DPP E 332      23.120  29.792  81.100  1.00  0.00
ATOM   3635  C28 DPP E 332      23.450  29.922  79.620  1.00  0.00
ATOM   3636  C29 DPP E 332      22.200  30.012  78.740  1.00  0.00
ATOM   3637 C210 DPP E 332      22.550  30.132  77.260  1.00  0.00
ATOM   3638 C211 DPP E 332      22.800  31.612  76.990  1.00  0.00
ATOM   3639 C212 DPP E 332      23.300  31.742  75.550  1.00  0.00
ATOM   3640 C213 DPP E 332      23.510  33.192  75.130  1.00  0.00
ATOM   3641 C214 DPP E 332      24.810  33.252  74.330  1.00  0.00
ATOM   3642 C215 DPP E 332      25.350  34.672  74.140  1.00  0.00
ATOM   3643 C216 DPP E 332      26.730  34.632  73.460  1.00  0.00
ATOM   3644  C1  DPP E 332      22.280  22.002  83.720  1.00  0.00
ATOM   3645  O11 DPP E 332      22.990  22.672  82.680  1.00  0.00
ATOM   3646  C11 DPP E 332      22.760  22.612  81.370  1.00  0.00
ATOM   3647  O12 DPP E 332      21.870  21.912  80.880  1.00  0.00
ATOM   3648  C12 DPP E 332      23.490  23.662  80.630  1.00  0.00
ATOM   3649  C13 DPP E 332      23.830  23.302  79.180  1.00  0.00
ATOM   3650  C14 DPP E 332      22.670  23.152  78.200  1.00  0.00
ATOM   3651  C15 DPP E 332      22.810  22.482  76.830  1.00  0.00
ATOM   3652  C16 DPP E 332      23.700  23.192  75.810  1.00  0.00
ATOM   3653  C17 DPP E 332      23.250  23.102  74.350  1.00  0.00
ATOM   3654  C18 DPP E 332      24.390  23.222  73.340  1.00  0.00
ATOM   3655  C19 DPP E 332      24.030  23.212  71.850  1.00  0.00
ATOM   3656 C110 DPP E 332      25.130  23.452  70.810  1.00  0.00
ATOM   3657 C111 DPP E 332      24.580  23.082  69.430  1.00  0.00
ATOM   3658 C112 DPP E 332      25.710  23.042  68.400  1.00  0.00
ATOM   3659 C113 DPP E 332      25.220  22.982  66.960  1.00  0.00
ATOM   3660 C114 DPP E 332      26.110  23.482  65.820  1.00  0.00
ATOM   3661 C115 DPP E 332      25.770  23.132  64.370  1.00  0.00
ATOM   3662 C116 DPP E 332      24.440  23.742  63.920  1.00  0.00
ATOM   3663  C33 DPP F 333      20.350   7.152  87.950  1.00  0.00
ATOM   3664  C34 DPP F 333      20.580   7.702  85.660  1.00  0.00
ATOM   3665  C35 DPP F 333      19.240   5.882  86.220  1.00  0.00
ATOM   3666  N   DPP F 333      19.630   7.222  86.670  1.00  0.00
ATOM   3667  C32 DPP F 333      18.540   8.182  86.860  1.00  0.00
ATOM   3668  C31 DPP F 333      17.490   8.052  87.970  1.00  0.00
ATOM   3669  O32 DPP F 333      16.810   6.812  87.780  1.00  0.00
ATOM   3670  P   DPP F 333      15.580   6.352  88.700  1.00  0.00
ATOM   3671  O33 DPP F 333      15.810   6.952  90.030  1.00  0.00
ATOM   3672  O34 DPP F 333      15.370   4.932  88.360  1.00  0.00
ATOM   3673  O31 DPP F 333      14.310   7.142  88.100  1.00  0.00
ATOM   3674  C3  DPP F 333      13.960   6.962  86.720  1.00  0.00
ATOM   3675  C2  DPP F 333      13.200   8.092  86.040  1.00  0.00
ATOM   3676  O21 DPP F 333      11.790   7.862  86.150  1.00  0.00
ATOM   3677  C21 DPP F 333      11.020   8.392  87.100  1.00  0.00
ATOM   3678  O22 DPP F 333      11.460   8.982  88.080  1.00  0.00
ATOM   3679  C22 DPP F 333       9.560   8.302  86.840  1.00  0.00
ATOM   3680  C23 DPP F 333       8.780   9.392  86.110  1.00  0.00
ATOM   3681  C24 DPP F 333       7.330   8.982  85.850  1.00  0.00
ATOM   3682  C25 DPP F 333       6.650   9.922  84.850  1.00  0.00
ATOM   3683  C26 DPP F 333       5.440   9.192  84.280  1.00  0.00
ATOM   3684  C27 DPP F 333       4.670   9.992  83.230  1.00  0.00
ATOM   3685  C28 DPP F 333       5.520  10.422  82.040  1.00  0.00
ATOM   3686  C29 DPP F 333       4.470  10.892  81.040  1.00  0.00
ATOM   3687 C210 DPP F 333       5.160  11.402  79.770  1.00  0.00
ATOM   3688 C211 DPP F 333       4.170  11.332  78.610  1.00  0.00
ATOM   3689 C212 DPP F 333       4.950  11.332  77.290  1.00  0.00
ATOM   3690 C213 DPP F 333       4.120  11.512  76.010  1.00  0.00
ATOM   3691 C214 DPP F 333       5.010  11.632  74.770  1.00  0.00
ATOM   3692 C215 DPP F 333       4.120  11.792  73.530  1.00  0.00
ATOM   3693 C216 DPP F 333       4.910  12.252  72.300  1.00  0.00
ATOM   3694  C1  DPP F 333      13.580   8.012  84.560  1.00  0.00
ATOM   3695  O11 DPP F 333      14.910   8.492  84.330  1.00  0.00
ATOM   3696  C11 DPP F 333      15.880   7.712  83.860  1.00  0.00
ATOM   3697  O12 DPP F 333      16.110   6.562  84.240  1.00  0.00
ATOM   3698  C12 DPP F 333      16.990   8.412  83.180  1.00  0.00
ATOM   3699  C13 DPP F 333      16.690   8.642  81.690  1.00  0.00
ATOM   3700  C14 DPP F 333      17.680   9.622  81.040  1.00  0.00
ATOM   3701  C15 DPP F 333      17.320   9.612  79.560  1.00  0.00
ATOM   3702  C16 DPP F 333      18.430  10.102  78.630  1.00  0.00
ATOM   3703  C17 DPP F 333      17.990  10.242  77.170  1.00  0.00
ATOM   3704  C18 DPP F 333      18.790  11.422  76.630  1.00  0.00
ATOM   3705  C19 DPP F 333      18.040  12.182  75.530  1.00  0.00
ATOM   3706 C110 DPP F 333      18.310  11.512  74.190  1.00  0.00
ATOM   3707 C111 DPP F 333      17.840  12.432  73.060  1.00  0.00
ATOM   3708 C112 DPP F 333      18.170  11.922  71.660  1.00  0.00
ATOM   3709 C113 DPP F 333      17.580  10.562  71.290  1.00  0.00
ATOM   3710 C114 DPP F 333      17.670  10.372  69.770  1.00  0.00
ATOM   3711 C115 DPP F 333      19.120  10.142  69.340  1.00  0.00
ATOM   3712 C116 DPP F 333      19.650   8.712  69.200  1.00  0.00
ATOM   3713  C33 DPP G 334       4.750   7.452  88.770  1.00  0.00
ATOM   3714  C34 DPP G 334       3.170   6.192  87.510  1.00  0.00
ATOM   3715  C35 DPP G 334       5.250   5.222  88.390  1.00  0.00
ATOM   3716  N   DPP G 334       4.120   6.132  88.630  1.00  0.00
ATOM   3717  C32 DPP G 334       3.510   5.872  89.940  1.00  0.00
ATOM   3718  C31 DPP G 334       2.880   4.482  90.070  1.00  0.00
ATOM   3719  O32 DPP G 334       3.770   3.382  90.220  1.00  0.00
ATOM   3720  P   DPP G 334       3.390   1.812  90.180  1.00  0.00
ATOM   3721  O33 DPP G 334       2.100   1.652  90.890  1.00  0.00
ATOM   3722  O34 DPP G 334       4.520   1.092  90.800  1.00  0.00
ATOM   3723  O31 DPP G 334       3.190   1.632  88.600  1.00  0.00
ATOM   3724  C3  DPP G 334       4.120   1.652  87.510  1.00  0.00
ATOM   3725  C2  DPP G 334       3.480   1.672  86.110  1.00  0.00
ATOM   3726  O21 DPP G 334       4.550   1.522  85.180  1.00  0.00
ATOM   3727  C21 DPP G 334       4.920   0.322  84.740  1.00  0.00
ATOM   3728  O22 DPP G 334       4.330  76.350  85.140  1.00  0.00
ATOM   3729  C22 DPP G 334       6.110   0.312  83.860  1.00  0.00
ATOM   3730  C23 DPP G 334       5.750   0.712  82.430  1.00  0.00
ATOM   3731  C24 DPP G 334       4.570  77.010  81.800  1.00  0.00
ATOM   3732  C25 DPP G 334       4.090   0.652  80.510  1.00  0.00
ATOM   3733  C26 DPP G 334       5.020   0.512  79.300  1.00  0.00
ATOM   3734  C27 DPP G 334       4.800   1.502  78.150  1.00  0.00
ATOM   3735  C28 DPP G 334       4.070   0.862  76.970  1.00  0.00
ATOM   3736  C29 DPP G 334       4.100   1.822  75.770  1.00  0.00
ATOM   3737 C210 DPP G 334       3.120   1.502  74.650  1.00  0.00
ATOM   3738 C211 DPP G 334       3.570   2.312  73.440  1.00  0.00
ATOM   3739 C212 DPP G 334       2.500   2.202  72.350  1.00  0.00
ATOM   3740 C213 DPP G 334       3.010   2.632  70.970  1.00  0.00
ATOM   3741 C214 DPP G 334       1.760   3.012  70.180  1.00  0.00
ATOM   3742 C215 DPP G 334       2.220   3.682  68.890  1.00  0.00
ATOM   3743 C216 DPP G 334       1.120   3.922  67.860  1.00  0.00
ATOM   3744  C1  DPP G 334       2.610   2.922  86.070  1.00  0.00
ATOM   3745  O11 DPP G 334       1.630   2.852  85.030  1.00  0.00
ATOM   3746  C11 DPP G 334       1.600   3.792  84.090  1.00  0.00
ATOM   3747  O12 DPP G 334       2.180   4.872  84.160  1.00  0.00
ATOM   3748  C12 DPP G 334       0.770   3.452  82.910  1.00  0.00
ATOM   3749  C13 DPP G 334       1.310   3.642  81.500  1.00  0.00
ATOM   3750  C14 DPP G 334       0.280   3.702  80.370  1.00  0.00
ATOM   3751  C15 DPP G 334       0.920   4.072  79.030  1.00  0.00
ATOM   3752  C16 DPP G 334      76.868   3.902  77.960  1.00  0.00
ATOM   3753  C17 DPP G 334       0.470   4.252  76.610  1.00  0.00
ATOM   3754  C18 DPP G 334      76.428   4.132  75.520  1.00  0.00
ATOM   3755  C19 DPP G 334      76.908   4.832  74.250  1.00  0.00
ATOM   3756 C110 DPP G 334      75.958   4.742  73.060  1.00  0.00
ATOM   3757 C111 DPP G 334      75.208   6.062  72.890  1.00  0.00
ATOM   3758 C112 DPP G 334      74.868   6.112  71.400  1.00  0.00
ATOM   3759 C113 DPP G 334      76.008   6.572  70.490  1.00  0.00
ATOM   3760 C114 DPP G 334      75.718   6.382  69.000  1.00  0.00
ATOM   3761 C115 DPP G 334      74.448   7.072  68.490  1.00  0.00
ATOM   3762 C116 DPP G 334      74.448   7.092  66.960  1.00  0.00
ATOM   3763  C33 DPP H 335       6.180  68.750  89.970  1.00  0.00
ATOM   3764  C34 DPP H 335       8.090  67.540  90.630  1.00  0.00
ATOM   3765  C35 DPP H 335       8.040  68.530  88.450  1.00  0.00
ATOM   3766  N   DPP H 335       7.650  68.700  89.850  1.00  0.00
ATOM   3767  C32 DPP H 335       8.340  69.820  90.500  1.00  0.00
ATOM   3768  C31 DPP H 335       7.710  71.220  90.460  1.00  0.00
ATOM   3769  O32 DPP H 335       7.500  71.760  89.150  1.00  0.00
ATOM   3770  P   DPP H 335       6.210  72.650  88.780  1.00  0.00
ATOM   3771  O33 DPP H 335       6.720  74.040  88.890  1.00  0.00
ATOM   3772  O34 DPP H 335       5.170  72.250  89.760  1.00  0.00
ATOM   3773  O31 DPP H 335       5.710  72.360  87.280  1.00  0.00
ATOM   3774  C3  DPP H 335       5.250  71.040  86.980  1.00  0.00
ATOM   3775  C2  DPP H 335       5.130  70.950  85.460  1.00  0.00
ATOM   3776  O21 DPP H 335       6.320  70.310  85.010  1.00  0.00
ATOM   3777  C21 DPP H 335       6.330  69.370  84.070  1.00  0.00
ATOM   3778  O22 DPP H 335       5.370  68.610  83.920  1.00  0.00
ATOM   3779  C22 DPP H 335       7.680  69.190  83.480  1.00  0.00
ATOM   3780  C23 DPP H 335       7.670  68.670  82.050  1.00  0.00
ATOM   3781  C24 DPP H 335       7.120  69.700  81.060  1.00  0.00
ATOM   3782  C25 DPP H 335       7.370  69.230  79.620  1.00  0.00
ATOM   3783  C26 DPP H 335       6.780  70.230  78.620  1.00  0.00
ATOM   3784  C27 DPP H 335       7.110  69.860  77.170  1.00  0.00
ATOM   3785  C28 DPP H 335       6.500  70.790  76.120  1.00  0.00
ATOM   3786  C29 DPP H 335       7.000  70.380  74.730  1.00  0.00
ATOM   3787 C210 DPP H 335       6.540  71.410  73.690  1.00  0.00
ATOM   3788 C211 DPP H 335       6.850  70.840  72.310  1.00  0.00
ATOM   3789 C212 DPP H 335       5.980  71.560  71.280  1.00  0.00
ATOM   3790 C213 DPP H 335       6.340  71.120  69.870  1.00  0.00
ATOM   3791 C214 DPP H 335       5.730  72.190  68.960  1.00  0.00
ATOM   3792 C215 DPP H 335       5.950  71.950  67.460  1.00  0.00
ATOM   3793 C216 DPP H 335       4.950  70.890  67.000  1.00  0.00
ATOM   3794  C1  DPP H 335       4.890  72.280  84.740  1.00  0.00
ATOM   3795  O11 DPP H 335       4.630  72.060  83.350  1.00  0.00
ATOM   3796  C11 DPP H 335       4.170  73.030  82.570  1.00  0.00
ATOM   3797  O12 DPP H 335       4.230  74.220  82.890  1.00  0.00
ATOM   3798  C12 DPP H 335       3.960  72.580  81.180  1.00  0.00
ATOM   3799  C13 DPP H 335       3.070  73.560  80.420  1.00  0.00
ATOM   3800  C14 DPP H 335       3.000  73.040  78.980  1.00  0.00
ATOM   3801  C15 DPP H 335       2.310  73.980  77.990  1.00  0.00
ATOM   3802  C16 DPP H 335       2.230  73.230  76.660  1.00  0.00
ATOM   3803  C17 DPP H 335       1.990  74.180  75.490  1.00  0.00
ATOM   3804  C18 DPP H 335       2.140  73.460  74.150  1.00  0.00
ATOM   3805  C19 DPP H 335       1.710  74.330  72.970  1.00  0.00
ATOM   3806 C110 DPP H 335       1.970  73.590  71.650  1.00  0.00
ATOM   3807 C111 DPP H 335       1.890  74.460  70.400  1.00  0.00
ATOM   3808 C112 DPP H 335       2.270  73.630  69.180  1.00  0.00
ATOM   3809 C113 DPP H 335       2.150  74.500  67.930  1.00  0.00
ATOM   3810 C114 DPP H 335       3.290  75.510  67.840  1.00  0.00
ATOM   3811 C115 DPP H 335       2.970  76.760  67.010  1.00  0.00
ATOM   3812 C116 DPP H 335       4.250   0.572  66.880  1.00  0.00
ATOM   3813  C33 DPP I 336      32.290  17.082  83.410  1.00  0.00
ATOM   3814  C34 DPP I 336      29.970  17.352  83.770  1.00  0.00
ATOM   3815  C35 DPP I 336      30.700  15.482  82.540  1.00  0.00
ATOM   3816  N   DPP I 336      31.040  16.352  83.670  1.00  0.00
ATOM   3817  C32 DPP I 336      31.220  15.532  84.880  1.00  0.00
ATOM   3818  C31 DPP I 336      30.110  14.532  85.220  1.00  0.00
ATOM   3819  O32 DPP I 336      28.760  14.972  85.300  1.00  0.00
ATOM   3820  P   DPP I 336      27.770  13.942  86.040  1.00  0.00
ATOM   3821  O33 DPP I 336      26.520  14.702  86.280  1.00  0.00
ATOM   3822  O34 DPP I 336      28.470  13.252  87.150  1.00  0.00
ATOM   3823  O31 DPP I 336      27.500  12.862  84.870  1.00  0.00
ATOM   3824  C3  DPP I 336      26.670  13.102  83.740  1.00  0.00
ATOM   3825  C2  DPP I 336      27.070  12.242  82.540  1.00  0.00
ATOM   3826  O21 DPP I 336      28.450  12.322  82.170  1.00  0.00
ATOM   3827  C21 DPP I 336      29.210  11.272  81.880  1.00  0.00
ATOM   3828  O22 DPP I 336      28.740  10.182  82.200  1.00  0.00
ATOM   3829  C22 DPP I 336      30.530  11.532  81.270  1.00  0.00
ATOM   3830  C23 DPP I 336      30.460  12.052  79.830  1.00  0.00
ATOM   3831  C24 DPP I 336      31.650  11.612  78.980  1.00  0.00
ATOM   3832  C25 DPP I 336      31.600  12.362  77.650  1.00  0.00
ATOM   3833  C26 DPP I 336      32.910  12.082  76.910  1.00  0.00
ATOM   3834  C27 DPP I 336      32.850  12.362  75.410  1.00  0.00
ATOM   3835  C28 DPP I 336      34.240  12.062  74.830  1.00  0.00
ATOM   3836  C29 DPP I 336      34.420  12.222  73.320  1.00  0.00
ATOM   3837 C210 DPP I 336      35.880  11.792  73.150  1.00  0.00
ATOM   3838 C211 DPP I 336      36.310  11.812  71.680  1.00  0.00
ATOM   3839 C212 DPP I 336      37.830  11.782  71.470  1.00  0.00
ATOM   3840 C213 DPP I 336      38.180  12.072  70.010  1.00  0.00
ATOM   3841 C214 DPP I 336      39.700  12.192  69.860  1.00  0.00
ATOM   3842 C215 DPP I 336      40.070  12.862  68.540  1.00  0.00
ATOM   3843 C216 DPP I 336      41.590  12.792  68.350  1.00  0.00
ATOM   3844  C1  DPP I 336      26.250  12.692  81.330  1.00  0.00
ATOM   3845  O11 DPP I 336      26.310  11.892  80.140  1.00  0.00
ATOM   3846  C11 DPP I 336      26.060  12.442  78.960  1.00  0.00
ATOM   3847  O12 DPP I 336      25.910  13.652  78.780  1.00  0.00
ATOM   3848  C12 DPP I 336      26.030  11.442  77.870  1.00  0.00
ATOM   3849  C13 DPP I 336      27.030  11.832  76.780  1.00  0.00
ATOM   3850  C14 DPP I 336      27.330  10.752  75.740  1.00  0.00
ATOM   3851  C15 DPP I 336      28.490  11.272  74.880  1.00  0.00
ATOM   3852  C16 DPP I 336      28.970  10.222  73.880  1.00  0.00
ATOM   3853  C17 DPP I 336      29.620  10.882  72.660  1.00  0.00
ATOM   3854  C18 DPP I 336      30.300   9.922  71.690  1.00  0.00
ATOM   3855  C19 DPP I 336      30.760  10.672  70.440  1.00  0.00
ATOM   3856 C110 DPP I 336      31.810  11.752  70.700  1.00  0.00
ATOM   3857 C111 DPP I 336      32.120  12.472  69.390  1.00  0.00
ATOM   3858 C112 DPP I 336      33.300  11.752  68.720  1.00  0.00
ATOM   3859 C113 DPP I 336      33.650  12.462  67.410  1.00  0.00
ATOM   3860 C114 DPP I 336      34.590  11.722  66.450  1.00  0.00
ATOM   3861 C115 DPP I 336      36.040  11.982  66.840  1.00  0.00
ATOM   3862 C116 DPP I 336      36.980  11.082  66.030  1.00  0.00
ATOM   3863  C33 DPP J 337      16.170   2.092  90.130  1.00  0.00
ATOM   3864  C34 DPP J 337      17.860   3.852  89.950  1.00  0.00
ATOM   3865  C35 DPP J 337      18.330   1.742  91.020  1.00  0.00
ATOM   3866  N   DPP J 337      17.590   2.402  89.940  1.00  0.00
ATOM   3867  C32 DPP J 337      17.970   1.632  88.750  1.00  0.00
ATOM   3868  C31 DPP J 337      19.180   2.082  87.920  1.00  0.00
ATOM   3869  O32 DPP J 337      20.380   1.942  88.680  1.00  0.00
ATOM   3870  P   DPP J 337      21.370   3.212  88.690  1.00  0.00
ATOM   3871  O33 DPP J 337      22.630   2.732  89.310  1.00  0.00
ATOM   3872  O34 DPP J 337      20.610   4.292  89.360  1.00  0.00
ATOM   3873  O31 DPP J 337      21.560   3.622  87.140  1.00  0.00
ATOM   3874  C3  DPP J 337      22.550   3.072  86.270  1.00  0.00
ATOM   3875  C2  DPP J 337      22.350   3.542  84.830  1.00  0.00
ATOM   3876  O21 DPP J 337      21.070   3.262  84.250  1.00  0.00
ATOM   3877  C21 DPP J 337      20.680   4.102  83.290  1.00  0.00
ATOM   3878  O22 DPP J 337      21.060   5.262  83.200  1.00  0.00
ATOM   3879  C22 DPP J 337      19.340   3.722  82.780  1.00  0.00
ATOM   3880  C23 DPP J 337      18.870   4.442  81.510  1.00  0.00
ATOM   3881  C24 DPP J 337      19.410   3.822  80.220  1.00  0.00
ATOM   3882  C25 DPP J 337      19.290   4.902  79.130  1.00  0.00
ATOM   3883  C26 DPP J 337      19.350   4.312  77.720  1.00  0.00
ATOM   3884  C27 DPP J 337      19.170   5.422  76.690  1.00  0.00
ATOM   3885  C28 DPP J 337      17.690   5.772  76.500  1.00  0.00
ATOM   3886  C29 DPP J 337      17.540   6.812  75.390  1.00  0.00
ATOM   3887 C210 DPP J 337      17.870   6.122  74.060  1.00  0.00
ATOM   3888 C211 DPP J 337      17.370   6.872  72.830  1.00  0.00
ATOM   3889 C212 DPP J 337      16.920   5.892  71.740  1.00  0.00
ATOM   3890 C213 DPP J 337      16.440   6.702  70.540  1.00  0.00
ATOM   3891 C214 DPP J 337      16.850   5.922  69.280  1.00  0.00
ATOM   3892 C215 DPP J 337      16.230   6.522  68.020  1.00  0.00
ATOM   3893 C216 DPP J 337      16.600   5.502  66.940  1.00  0.00
ATOM   3894  C1  DPP J 337      23.450   3.192  83.830  1.00  0.00
ATOM   3895  O11 DPP J 337      23.750   1.792  83.810  1.00  0.00
ATOM   3896  C11 DPP J 337      23.770   1.122  82.670  1.00  0.00
ATOM   3897  O12 DPP J 337      23.150   1.442  81.660  1.00  0.00
ATOM   3898  C12 DPP J 337      24.540  76.910  82.940  1.00  0.00
ATOM   3899  C13 DPP J 337      23.690  75.660  83.180  1.00  0.00
ATOM   3900  C14 DPP J 337      24.560  74.400  83.150  1.00  0.00
ATOM   3901  C15 DPP J 337      23.790  73.090  83.300  1.00  0.00
ATOM   3902  C16 DPP J 337      23.270  73.090  84.730  1.00  0.00
ATOM   3903  C17 DPP J 337      22.510  71.920  85.370  1.00  0.00
ATOM   3904  C18 DPP J 337      23.280  70.610  85.290  1.00  0.00
ATOM   3905  C19 DPP J 337      22.820  69.500  86.240  1.00  0.00
ATOM   3906 C110 DPP J 337      23.510  68.180  85.910  1.00  0.00
ATOM   3907 C111 DPP J 337      22.470  67.110  86.210  1.00  0.00
ATOM   3908 C112 DPP J 337      22.980  65.660  86.230  1.00  0.00
ATOM   3909 C113 DPP J 337      21.810  64.690  86.400  1.00  0.00
ATOM   3910 C114 DPP J 337      21.100  64.930  87.740  1.00  0.00
ATOM   3911 C115 DPP J 337      19.830  64.100  87.940  1.00  0.00
ATOM   3912 C116 DPP J 337      18.640  64.510  87.060  1.00  0.00
ATOM   3913  C33 DPP K 338      28.880  63.360  82.840  1.00  0.00
ATOM   3914  C34 DPP K 338      27.590  64.880  81.450  1.00  0.00
ATOM   3915  C35 DPP K 338      28.310  65.560  83.570  1.00  0.00
ATOM   3916  N   DPP K 338      28.700  64.760  82.410  1.00  0.00
ATOM   3917  C32 DPP K 338      29.990  65.240  81.880  1.00  0.00
ATOM   3918  C31 DPP K 338      30.550  64.780  80.530  1.00  0.00
ATOM   3919  O32 DPP K 338      29.820  65.210  79.380  1.00  0.00
ATOM   3920  P   DPP K 338      30.400  64.640  77.990  1.00  0.00
ATOM   3921  O33 DPP K 338      31.820  65.050  77.960  1.00  0.00
ATOM   3922  O34 DPP K 338      29.500  65.000  76.860  1.00  0.00
ATOM   3923  O31 DPP K 338      30.410  63.060  78.300  1.00  0.00
ATOM   3924  C3  DPP K 338      29.280  62.220  78.030  1.00  0.00
ATOM   3925  C2  DPP K 338      29.550  60.720  77.970  1.00  0.00
ATOM   3926  O21 DPP K 338      30.170  60.470  76.710  1.00  0.00
ATOM   3927  C21 DPP K 338      31.230  59.660  76.730  1.00  0.00
ATOM   3928  O22 DPP K 338      31.530  59.030  77.750  1.00  0.00
ATOM   3929  C22 DPP K 338      31.760  59.410  75.380  1.00  0.00
ATOM   3930  C23 DPP K 338      32.490  58.070  75.290  1.00  0.00
ATOM   3931  C24 DPP K 338      33.560  57.850  74.210  1.00  0.00
ATOM   3932  C25 DPP K 338      34.380  56.570  74.410  1.00  0.00
ATOM   3933  C26 DPP K 338      35.440  56.270  73.350  1.00  0.00
ATOM   3934  C27 DPP K 338      34.850  56.030  71.960  1.00  0.00
ATOM   3935  C28 DPP K 338      33.900  54.830  71.940  1.00  0.00
ATOM   3936  C29 DPP K 338      34.090  53.800  70.830  1.00  0.00
ATOM   3937 C210 DPP K 338      32.760  53.250  70.300  1.00  0.00
ATOM   3938 C211 DPP K 338      32.990  52.290  69.140  1.00  0.00
ATOM   3939 C212 DPP K 338      31.830  51.340  68.830  1.00  0.00
ATOM   3940 C213 DPP K 338      32.140  50.220  67.830  1.00  0.00
ATOM   3941 C214 DPP K 338      32.190  50.430  66.310  1.00  0.00
ATOM   3942 C215 DPP K 338      30.820  50.880  65.820  1.00  0.00
ATOM   3943 C216 DPP K 338      30.840  51.080  64.300  1.00  0.00
ATOM   3944  C1  DPP K 338      28.140  60.120  77.920  1.00  0.00
ATOM   3945  O11 DPP K 338      27.950  58.720  77.720  1.00  0.00
ATOM   3946  C11 DPP K 338      28.070  57.750  78.630  1.00  0.00
ATOM   3947  O12 DPP K 338      27.780  58.000  79.800  1.00  0.00
ATOM   3948  C12 DPP K 338      28.290  56.450  77.970  1.00  0.00
ATOM   3949  C13 DPP K 338      29.800  56.220  78.020  1.00  0.00
ATOM   3950  C14 DPP K 338      30.200  54.820  77.540  1.00  0.00
ATOM   3951  C15 DPP K 338      31.670  54.600  77.900  1.00  0.00
ATOM   3952  C16 DPP K 338      32.120  53.200  77.460  1.00  0.00
ATOM   3953  C17 DPP K 338      32.060  53.020  75.950  1.00  0.00
ATOM   3954  C18 DPP K 338      32.130  51.560  75.500  1.00  0.00
ATOM   3955  C19 DPP K 338      32.530  51.450  74.020  1.00  0.00
ATOM   3956 C110 DPP K 338      32.640  49.950  73.730  1.00  0.00
ATOM   3957 C111 DPP K 338      33.170  49.510  72.360  1.00  0.00
ATOM   3958 C112 DPP K 338      33.230  48.010  72.060  1.00  0.00
ATOM   3959 C113 DPP K 338      33.800  47.860  70.650  1.00  0.00
ATOM   3960 C114 DPP K 338      33.820  46.390  70.230  1.00  0.00
ATOM   3961 C115 DPP K 338      34.320  46.390  68.780  1.00  0.00
ATOM   3962 C116 DPP K 338      35.840  46.430  69.010  1.00  0.00
ATOM   3963  C33 DPP L 339      25.110  17.482  86.440  1.00  0.00
ATOM   3964  C34 DPP L 339      26.840  18.172  85.220  1.00  0.00
ATOM   3965  C35 DPP L 339      25.700  19.852  86.630  1.00  0.00
ATOM   3966  N   DPP L 339      26.200  18.472  86.510  1.00  0.00
ATOM   3967  C32 DPP L 339      27.060  18.022  87.610  1.00  0.00
ATOM   3968  C31 DPP L 339      28.330  18.742  88.060  1.00  0.00
ATOM   3969  O32 DPP L 339      29.210  18.772  86.940  1.00  0.00
ATOM   3970  P   DPP L 339      30.580  19.602  86.830  1.00  0.00
ATOM   3971  O33 DPP L 339      31.360  18.952  85.750  1.00  0.00
ATOM   3972  O34 DPP L 339      31.240  19.762  88.150  1.00  0.00
ATOM   3973  O31 DPP L 339      30.230  21.102  86.340  1.00  0.00
ATOM   3974  C3  DPP L 339      29.510  21.222  85.110  1.00  0.00
ATOM   3975  C2  DPP L 339      28.530  22.352  84.780  1.00  0.00
ATOM   3976  O21 DPP L 339      28.090  22.222  83.420  1.00  0.00
ATOM   3977  C21 DPP L 339      27.010  21.592  82.990  1.00  0.00
ATOM   3978  O22 DPP L 339      26.160  21.122  83.750  1.00  0.00
ATOM   3979  C22 DPP L 339      26.820  21.972  81.570  1.00  0.00
ATOM   3980  C23 DPP L 339      27.260  20.922  80.550  1.00  0.00
ATOM   3981  C24 DPP L 339      27.290  21.392  79.090  1.00  0.00
ATOM   3982  C25 DPP L 339      27.940  20.402  78.120  1.00  0.00
ATOM   3983  C26 DPP L 339      27.730  20.982  76.720  1.00  0.00
ATOM   3984  C27 DPP L 339      28.080  19.972  75.630  1.00  0.00
ATOM   3985  C28 DPP L 339      27.870  20.642  74.270  1.00  0.00
ATOM   3986  C29 DPP L 339      27.860  19.572  73.170  1.00  0.00
ATOM   3987 C210 DPP L 339      27.670  20.162  71.770  1.00  0.00
ATOM   3988 C211 DPP L 339      28.920  20.882  71.260  1.00  0.00
ATOM   3989 C212 DPP L 339      28.890  21.062  69.740  1.00  0.00
ATOM   3990 C213 DPP L 339      30.130  21.862  69.340  1.00  0.00
ATOM   3991 C214 DPP L 339      31.440  21.102  69.550  1.00  0.00
ATOM   3992 C215 DPP L 339      32.660  21.902  69.090  1.00  0.00
ATOM   3993 C216 DPP L 339      32.800  21.842  67.570  1.00  0.00
ATOM   3994  C1  DPP L 339      29.030  23.772  85.080  1.00  0.00
ATOM   3995  O11 DPP L 339      28.310  24.792  84.380  1.00  0.00
ATOM   3996  C11 DPP L 339      29.010  25.582  83.560  1.00  0.00
ATOM   3997  O12 DPP L 339      30.230  25.432  83.470  1.00  0.00
ATOM   3998  C12 DPP L 339      28.180  26.372  82.630  1.00  0.00
ATOM   3999  C13 DPP L 339      28.050  25.802  81.210  1.00  0.00
ATOM   4000  C14 DPP L 339      27.480  26.912  80.330  1.00  0.00
ATOM   4001  C15 DPP L 339      26.950  26.562  78.940  1.00  0.00
ATOM   4002  C16 DPP L 339      27.810  25.752  77.960  1.00  0.00
ATOM   4003  C17 DPP L 339      27.070  25.632  76.630  1.00  0.00
ATOM   4004  C18 DPP L 339      27.300  26.822  75.690  1.00  0.00
ATOM   4005  C19 DPP L 339      26.650  26.792  74.310  1.00  0.00
ATOM   4006 C110 DPP L 339      25.200  27.282  74.360  1.00  0.00
ATOM   4007 C111 DPP L 339      24.570  27.452  72.980  1.00  0.00
ATOM   4008 C112 DPP L 339      23.470  28.512  73.140  1.00  0.00
ATOM   4009 C113 DPP L 339      23.190  29.392  71.920  1.00  0.00
ATOM   4010 C114 DPP L 339      22.240  30.552  72.210  1.00  0.00
ATOM   4011 C115 DPP L 339      20.960  30.052  72.890  1.00  0.00
ATOM   4012 C116 DPP L 339      19.810  31.042  73.000  1.00  0.00
ATOM   4013  C33 DPP M 340      35.580  75.520  82.040  1.00  0.00
ATOM   4014  C34 DPP M 340      37.080  74.290  80.600  1.00  0.00
ATOM   4015  C35 DPP M 340      37.820  75.190  82.750  1.00  0.00
ATOM   4016  N   DPP M 340      36.720  74.590  81.990  1.00  0.00
ATOM   4017  C32 DPP M 340      36.290  73.410  82.760  1.00  0.00
ATOM   4018  C31 DPP M 340      34.920  72.740  82.590  1.00  0.00
ATOM   4019  O32 DPP M 340      34.660  72.320  81.250  1.00  0.00
ATOM   4020  P   DPP M 340      33.370  71.450  80.850  1.00  0.00
ATOM   4021  O33 DPP M 340      32.590  71.100  82.060  1.00  0.00
ATOM   4022  O34 DPP M 340      33.780  70.340  79.960  1.00  0.00
ATOM   4023  O31 DPP M 340      32.600  72.520  79.920  1.00  0.00
ATOM   4024  C3  DPP M 340      31.720  73.530  80.430  1.00  0.00
ATOM   4025  C2  DPP M 340      30.500  73.840  79.560  1.00  0.00
ATOM   4026  O21 DPP M 340      29.730  74.760  80.340  1.00  0.00
ATOM   4027  C21 DPP M 340      29.860  76.080  80.240  1.00  0.00
ATOM   4028  O22 DPP M 340      30.860  76.590  79.720  1.00  0.00
ATOM   4029  C22 DPP M 340      28.680  76.720  80.850  1.00  0.00
ATOM   4030  C23 DPP M 340      27.550   0.192  79.940  1.00  0.00
ATOM   4031  C24 DPP M 340      26.850  75.980  79.380  1.00  0.00
ATOM   4032  C25 DPP M 340      25.760  76.220  78.340  1.00  0.00
ATOM   4033  C26 DPP M 340      24.590   0.032  78.840  1.00  0.00
ATOM   4034  C27 DPP M 340      23.410  76.740  77.920  1.00  0.00
ATOM   4035  C28 DPP M 340      22.180   0.562  78.220  1.00  0.00
ATOM   4036  C29 DPP M 340      20.950   0.012  77.500  1.00  0.00
ATOM   4037 C210 DPP M 340      21.070   0.362  76.010  1.00  0.00
ATOM   4038 C211 DPP M 340      20.310  76.420  75.100  1.00  0.00
ATOM   4039 C212 DPP M 340      20.700  76.610  73.630  1.00  0.00
ATOM   4040 C213 DPP M 340      19.970  75.810  72.550  1.00  0.00
ATOM   4041 C214 DPP M 340      20.600  75.850  71.160  1.00  0.00
ATOM   4042 C215 DPP M 340      20.610   0.112  70.340  1.00  0.00
ATOM   4043 C216 DPP M 340      21.240  77.010  68.950  1.00  0.00
ATOM   4044  C1  DPP M 340      29.780  72.530  79.270  1.00  0.00
ATOM   4045  O11 DPP M 340      28.830  72.810  78.240  1.00  0.00
ATOM   4046  C11 DPP M 340      27.950  71.880  77.880  1.00  0.00
ATOM   4047  O12 DPP M 340      28.070  70.680  78.140  1.00  0.00
ATOM   4048  C12 DPP M 340      26.810  72.430  77.110  1.00  0.00
ATOM   4049  C13 DPP M 340      27.070  72.510  75.610  1.00  0.00
ATOM   4050  C14 DPP M 340      27.160  71.160  74.900  1.00  0.00
ATOM   4051  C15 DPP M 340      25.720  70.610  74.910  1.00  0.00
ATOM   4052  C16 DPP M 340      25.460  69.410  74.000  1.00  0.00
ATOM   4053  C17 DPP M 340      24.000  68.960  74.120  1.00  0.00
ATOM   4054  C18 DPP M 340      23.640  67.720  73.300  1.00  0.00
ATOM   4055  C19 DPP M 340      22.160  67.330  73.160  1.00  0.00
ATOM   4056 C110 DPP M 340      21.540  66.810  74.460  1.00  0.00
ATOM   4057 C111 DPP M 340      20.330  65.900  74.240  1.00  0.00
ATOM   4058 C112 DPP M 340      19.640  65.610  75.570  1.00  0.00
ATOM   4059 C113 DPP M 340      18.560  64.550  75.310  1.00  0.00
ATOM   4060 C114 DPP M 340      17.880  64.110  76.600  1.00  0.00
ATOM   4061 C115 DPP M 340      18.750  63.600  77.750  1.00  0.00
ATOM   4062 C116 DPP M 340      17.950  63.190  78.990  1.00  0.00
ATOM   4063  C33 DPP N 341      34.820  22.342  82.490  1.00  0.00
ATOM   4064  C34 DPP N 341      33.390  21.452  84.210  1.00  0.00
ATOM   4065  C35 DPP N 341      33.550  23.782  83.940  1.00  0.00
ATOM   4066  N   DPP N 341      33.540  22.512  83.200  1.00  0.00
ATOM   4067  C32 DPP N 341      32.470  22.602  82.200  1.00  0.00
ATOM   4068  C31 DPP N 341      31.880  21.272  81.730  1.00  0.00
ATOM   4069  O32 DPP N 341      32.710  20.212  81.230  1.00  0.00
ATOM   4070  P   DPP N 341      31.890  19.072  80.450  1.00  0.00
ATOM   4071  O33 DPP N 341      30.610  18.802  81.140  1.00  0.00
ATOM   4072  O34 DPP N 341      32.860  17.962  80.290  1.00  0.00
ATOM   4073  O31 DPP N 341      31.700  19.722  78.990  1.00  0.00
ATOM   4074  C3  DPP N 341      32.770  20.322  78.250  1.00  0.00
ATOM   4075  C2  DPP N 341      32.320  20.832  76.880  1.00  0.00
ATOM   4076  O21 DPP N 341      33.450  20.882  76.000  1.00  0.00
ATOM   4077  C21 DPP N 341      33.530  20.062  74.960  1.00  0.00
ATOM   4078  O22 DPP N 341      32.840  19.082  74.690  1.00  0.00
ATOM   4079  C22 DPP N 341      34.750  20.452  74.220  1.00  0.00
ATOM   4080  C23 DPP N 341      34.540  21.642  73.280  1.00  0.00
ATOM   4081  C24 DPP N 341      35.890  22.202  72.840  1.00  0.00
ATOM   4082  C25 DPP N 341      35.890  23.702  73.140  1.00  0.00
ATOM   4083  C26 DPP N 341      35.350  24.552  71.990  1.00  0.00
ATOM   4084  C27 DPP N 341      36.460  24.992  71.040  1.00  0.00
ATOM   4085  C28 DPP N 341      35.820  25.372  69.700  1.00  0.00
ATOM   4086  C29 DPP N 341      36.870  25.812  68.680  1.00  0.00
ATOM   4087 C210 DPP N 341      36.400  25.742  67.220  1.00  0.00
ATOM   4088 C211 DPP N 341      37.630  25.872  66.320  1.00  0.00
ATOM   4089 C212 DPP N 341      37.110  26.022  64.890  1.00  0.00
ATOM   4090 C213 DPP N 341      38.210  26.022  63.820  1.00  0.00
ATOM   4091 C214 DPP N 341      37.650  25.762  62.420  1.00  0.00
ATOM   4092 C215 DPP N 341      38.610  25.782  61.220  1.00  0.00
ATOM   4093 C216 DPP N 341      38.700  27.152  60.550  1.00  0.00
ATOM   4094  C1  DPP N 341      31.740  22.242  76.960  1.00  0.00
ATOM   4095  O11 DPP N 341      31.260  22.722  75.700  1.00  0.00
ATOM   4096  C11 DPP N 341      30.590  23.862  75.690  1.00  0.00
ATOM   4097  O12 DPP N 341      30.620  24.782  76.510  1.00  0.00
ATOM   4098  C12 DPP N 341      29.940  23.982  74.360  1.00  0.00
ATOM   4099  C13 DPP N 341      30.920  24.622  73.380  1.00  0.00
ATOM   4100  C14 DPP N 341      30.520  24.552  71.900  1.00  0.00
ATOM   4101  C15 DPP N 341      29.160  25.212  71.660  1.00  0.00
ATOM   4102  C16 DPP N 341      28.990  25.682  70.220  1.00  0.00
ATOM   4103  C17 DPP N 341      27.730  26.532  70.040  1.00  0.00
ATOM   4104  C18 DPP N 341      27.780  26.922  68.560  1.00  0.00
ATOM   4105  C19 DPP N 341      26.500  27.702  68.230  1.00  0.00
ATOM   4106 C110 DPP N 341      26.050  27.362  66.810  1.00  0.00
ATOM   4107 C111 DPP N 341      27.000  27.922  65.750  1.00  0.00
ATOM   4108 C112 DPP N 341      26.340  27.902  64.370  1.00  0.00
ATOM   4109 C113 DPP N 341      25.150  28.862  64.380  1.00  0.00
ATOM   4110 C114 DPP N 341      24.660  29.032  62.940  1.00  0.00
ATOM   4111 C115 DPP N 341      24.110  27.712  62.380  1.00  0.00
ATOM   4112 C116 DPP N 341      23.460  27.852  61.000  1.00  0.00
ATOM   4113  C33 DPP O 342      30.630  70.970  84.690  1.00  0.00
ATOM   4114  C34 DPP O 342      29.600  72.310  86.330  1.00  0.00
ATOM   4115  C35 DPP O 342      30.400  73.320  84.270  1.00  0.00
ATOM   4116  N   DPP O 342      29.760  72.140  84.870  1.00  0.00
ATOM   4117  C32 DPP O 342      28.360  71.990  84.450  1.00  0.00
ATOM   4118  C31 DPP O 342      28.020  71.850  82.960  1.00  0.00
ATOM   4119  O32 DPP O 342      28.740  70.810  82.310  1.00  0.00
ATOM   4120  P   DPP O 342      28.430  69.280  82.720  1.00  0.00
ATOM   4121  O33 DPP O 342      28.050  69.040  84.130  1.00  0.00
ATOM   4122  O34 DPP O 342      29.620  68.530  82.270  1.00  0.00
ATOM   4123  O31 DPP O 342      27.180  68.790  81.840  1.00  0.00
ATOM   4124  C3  DPP O 342      27.190  68.370  80.470  1.00  0.00
ATOM   4125  C2  DPP O 342      25.800  68.130  79.890  1.00  0.00
ATOM   4126  O21 DPP O 342      26.000  67.810  78.510  1.00  0.00
ATOM   4127  C21 DPP O 342      26.040  66.560  78.060  1.00  0.00
ATOM   4128  O22 DPP O 342      25.900  65.560  78.760  1.00  0.00
ATOM   4129  C22 DPP O 342      26.430  66.510  76.630  1.00  0.00
ATOM   4130  C23 DPP O 342      25.900  65.290  75.870  1.00  0.00
ATOM   4131  C24 DPP O 342      26.590  65.070  74.520  1.00  0.00
ATOM   4132  C25 DPP O 342      25.980  63.870  73.800  1.00  0.00
ATOM   4133  C26 DPP O 342      24.470  63.860  73.610  1.00  0.00
ATOM   4134  C27 DPP O 342      23.960  62.550  72.990  1.00  0.00
ATOM   4135  C28 DPP O 342      22.440  62.400  73.000  1.00  0.00
ATOM   4136  C29 DPP O 342      22.120  60.910  72.900  1.00  0.00
ATOM   4137 C210 DPP O 342      20.700  60.650  72.390  1.00  0.00
ATOM   4138 C211 DPP O 342      20.180  59.210  72.470  1.00  0.00
ATOM   4139 C212 DPP O 342      18.830  59.320  71.740  1.00  0.00
ATOM   4140 C213 DPP O 342      17.660  59.930  72.500  1.00  0.00
ATOM   4141 C214 DPP O 342      16.300  59.880  71.800  1.00  0.00
ATOM   4142 C215 DPP O 342      15.360  58.910  72.530  1.00  0.00
ATOM   4143 C216 DPP O 342      14.170  59.610  73.180  1.00  0.00
ATOM   4144  C1  DPP O 342      24.860  69.330  80.020  1.00  0.00
ATOM   4145  O11 DPP O 342      23.450  69.130  79.890  1.00  0.00
ATOM   4146  C11 DPP O 342      22.820  69.140  78.720  1.00  0.00
ATOM   4147  O12 DPP O 342      23.500  69.040  77.700  1.00  0.00
ATOM   4148  C12 DPP O 342      21.350  69.260  78.810  1.00  0.00
ATOM   4149  C13 DPP O 342      20.590  67.930  78.830  1.00  0.00
ATOM   4150  C14 DPP O 342      20.540  67.590  80.320  1.00  0.00
ATOM   4151  C15 DPP O 342      20.100  66.180  80.730  1.00  0.00
ATOM   4152  C16 DPP O 342      20.210  66.090  82.260  1.00  0.00
ATOM   4153  C17 DPP O 342      19.630  64.790  82.820  1.00  0.00
ATOM   4154  C18 DPP O 342      20.530  63.560  82.630  1.00  0.00
ATOM   4155  C19 DPP O 342      19.650  62.320  82.420  1.00  0.00
ATOM   4156 C110 DPP O 342      20.450  61.030  82.220  1.00  0.00
ATOM   4157 C111 DPP O 342      21.300  60.580  83.410  1.00  0.00
ATOM   4158 C112 DPP O 342      20.390  60.260  84.600  1.00  0.00
ATOM   4159 C113 DPP O 342      21.250  59.950  85.830  1.00  0.00
ATOM   4160 C114 DPP O 342      20.470  59.120  86.850  1.00  0.00
ATOM   4161 C115 DPP O 342      19.830  57.870  86.230  1.00  0.00
ATOM   4162 C116 DPP O 342      18.800  57.130  87.080  1.00  0.00
ATOM   4163  C33 DPP P 343      12.390  17.982  91.590  1.00  0.00
ATOM   4164  C34 DPP P 343      12.890  20.342  91.320  1.00  0.00
ATOM   4165  C35 DPP P 343      14.610  18.722  91.180  1.00  0.00
ATOM   4166  N   DPP P 343      13.200  18.982  90.870  1.00  0.00
ATOM   4167  C32 DPP P 343      12.900  19.012  89.430  1.00  0.00
ATOM   4168  C31 DPP P 343      13.320  17.812  88.580  1.00  0.00
ATOM   4169  O32 DPP P 343      12.840  16.522  88.960  1.00  0.00
ATOM   4170  P   DPP P 343      13.880  15.282  88.930  1.00  0.00
ATOM   4171  O33 DPP P 343      13.080  14.332  89.730  1.00  0.00
ATOM   4172  O34 DPP P 343      15.120  15.722  89.600  1.00  0.00
ATOM   4173  O31 DPP P 343      14.110  14.712  87.440  1.00  0.00
ATOM   4174  C3  DPP P 343      13.630  13.452  86.960  1.00  0.00
ATOM   4175  C2  DPP P 343      12.190  13.582  86.470  1.00  0.00
ATOM   4176  O21 DPP P 343      11.290  13.582  87.580  1.00  0.00
ATOM   4177  C21 DPP P 343      10.300  14.482  87.580  1.00  0.00
ATOM   4178  O22 DPP P 343      10.370  15.532  86.960  1.00  0.00
ATOM   4179  C22 DPP P 343       9.330  14.222  88.670  1.00  0.00
ATOM   4180  C23 DPP P 343       8.160  13.282  88.380  1.00  0.00
ATOM   4181  C24 DPP P 343       7.290  13.392  87.130  1.00  0.00
ATOM   4182  C25 DPP P 343       6.250  14.482  87.360  1.00  0.00
ATOM   4183  C26 DPP P 343       5.160  14.512  86.290  1.00  0.00
ATOM   4184  C27 DPP P 343       5.720  14.972  84.940  1.00  0.00
ATOM   4185  C28 DPP P 343       4.730  14.922  83.780  1.00  0.00
ATOM   4186  C29 DPP P 343       5.570  15.142  82.510  1.00  0.00
ATOM   4187 C210 DPP P 343       4.630  15.342  81.320  1.00  0.00
ATOM   4188 C211 DPP P 343       5.300  16.102  80.170  1.00  0.00
ATOM   4189 C212 DPP P 343       4.320  16.522  79.070  1.00  0.00
ATOM   4190 C213 DPP P 343       4.030  15.522  77.950  1.00  0.00
ATOM   4191 C214 DPP P 343       4.810  15.772  76.660  1.00  0.00
ATOM   4192 C215 DPP P 343       4.780  17.272  76.350  1.00  0.00
ATOM   4193 C216 DPP P 343       5.260  17.652  74.950  1.00  0.00
ATOM   4194  C1  DPP P 343      11.850  12.302  85.700  1.00  0.00
ATOM   4195  O11 DPP P 343      10.770  12.462  84.780  1.00  0.00
ATOM   4196  C11 DPP P 343      10.660  11.592  83.780  1.00  0.00
ATOM   4197  O12 DPP P 343      11.310  10.542  83.750  1.00  0.00
ATOM   4198  C12 DPP P 343       9.580  11.922  82.830  1.00  0.00
ATOM   4199  C13 DPP P 343       9.950  12.662  81.540  1.00  0.00
ATOM   4200  C14 DPP P 343       8.770  12.782  80.570  1.00  0.00
ATOM   4201  C15 DPP P 343       9.420  13.292  79.290  1.00  0.00
ATOM   4202  C16 DPP P 343       8.310  13.892  78.440  1.00  0.00
ATOM   4203  C17 DPP P 343       8.870  14.402  77.110  1.00  0.00
ATOM   4204  C18 DPP P 343       8.930  13.262  76.100  1.00  0.00
ATOM   4205  C19 DPP P 343       9.070  13.722  74.640  1.00  0.00
ATOM   4206 C110 DPP P 343       8.050  14.802  74.280  1.00  0.00
ATOM   4207 C111 DPP P 343       7.860  14.912  72.770  1.00  0.00
ATOM   4208 C112 DPP P 343       6.980  16.092  72.340  1.00  0.00
ATOM   4209 C113 DPP P 343       6.620  15.792  70.880  1.00  0.00
ATOM   4210 C114 DPP P 343       6.170  16.992  70.050  1.00  0.00
ATOM   4211 C115 DPP P 343       5.730  16.702  68.610  1.00  0.00
ATOM   4212 C116 DPP P 343       6.830  17.002  67.590  1.00  0.00
ATOM   4213  C33 DPP Q 344      22.060  11.082  86.810  1.00  0.00
ATOM   4214  C34 DPP Q 344      22.120  12.932  88.430  1.00  0.00
ATOM   4215  C35 DPP Q 344      23.670  11.132  88.500  1.00  0.00
ATOM   4216  N   DPP Q 344      22.900  11.992  87.600  1.00  0.00
ATOM   4217  C32 DPP Q 344      23.890  12.592  86.690  1.00  0.00
ATOM   4218  C31 DPP Q 344      23.580  12.952  85.240  1.00  0.00
ATOM   4219  O32 DPP Q 344      22.420  13.762  85.050  1.00  0.00
ATOM   4220  P   DPP Q 344      22.070  15.232  85.620  1.00  0.00
ATOM   4221  O33 DPP Q 344      22.690  15.412  86.950  1.00  0.00
ATOM   4222  O34 DPP Q 344      20.630  15.352  85.320  1.00  0.00
ATOM   4223  O31 DPP Q 344      23.020  16.112  84.660  1.00  0.00
ATOM   4224  C3  DPP Q 344      22.490  16.492  83.390  1.00  0.00
ATOM   4225  C2  DPP Q 344      23.570  17.092  82.480  1.00  0.00
ATOM   4226  O21 DPP Q 344      22.900  17.372  81.240  1.00  0.00
ATOM   4227  C21 DPP Q 344      23.080  18.472  80.510  1.00  0.00
ATOM   4228  O22 DPP Q 344      23.390  19.532  81.040  1.00  0.00
ATOM   4229  C22 DPP Q 344      22.380  18.382  79.200  1.00  0.00
ATOM   4230  C23 DPP Q 344      23.290  18.642  78.000  1.00  0.00
ATOM   4231  C24 DPP Q 344      22.580  18.782  76.660  1.00  0.00
ATOM   4232  C25 DPP Q 344      23.510  18.622  75.460  1.00  0.00
ATOM   4233  C26 DPP Q 344      22.830  18.432  74.100  1.00  0.00
ATOM   4234  C27 DPP Q 344      23.700  18.992  72.960  1.00  0.00
ATOM   4235  C28 DPP Q 344      23.020  18.782  71.610  1.00  0.00
ATOM   4236  C29 DPP Q 344      24.060  19.062  70.530  1.00  0.00
ATOM   4237 C210 DPP Q 344      23.580  19.052  69.080  1.00  0.00
ATOM   4238 C211 DPP Q 344      24.700  19.502  68.140  1.00  0.00
ATOM   4239 C212 DPP Q 344      25.720  18.382  67.920  1.00  0.00
ATOM   4240 C213 DPP Q 344      26.640  18.902  66.810  1.00  0.00
ATOM   4241 C214 DPP Q 344      27.620  17.782  66.430  1.00  0.00
ATOM   4242 C215 DPP Q 344      28.640  18.122  65.340  1.00  0.00
ATOM   4243 C216 DPP Q 344      29.460  19.362  65.720  1.00  0.00
ATOM   4244  C1  DPP Q 344      24.850  16.272  82.370  1.00  0.00
ATOM   4245  O11 DPP Q 344      25.750  16.802  81.390  1.00  0.00
ATOM   4246  C11 DPP Q 344      26.940  16.262  81.120  1.00  0.00
ATOM   4247  O12 DPP Q 344      27.620  15.822  82.050  1.00  0.00
ATOM   4248  C12 DPP Q 344      27.520  16.642  79.820  1.00  0.00
ATOM   4249  C13 DPP Q 344      28.620  15.672  79.390  1.00  0.00
ATOM   4250  C14 DPP Q 344      29.200  16.062  78.030  1.00  0.00
ATOM   4251  C15 DPP Q 344      28.210  15.712  76.920  1.00  0.00
ATOM   4252  C16 DPP Q 344      28.780  16.142  75.570  1.00  0.00
ATOM   4253  C17 DPP Q 344      27.850  15.512  74.530  1.00  0.00
ATOM   4254  C18 DPP Q 344      28.220  15.452  73.050  1.00  0.00
ATOM   4255  C19 DPP Q 344      27.140  15.142  72.020  1.00  0.00
ATOM   4256 C110 DPP Q 344      27.550  14.902  70.570  1.00  0.00
ATOM   4257 C111 DPP Q 344      28.630  15.912  70.170  1.00  0.00
ATOM   4258 C112 DPP Q 344      29.490  15.532  68.960  1.00  0.00
ATOM   4259 C113 DPP Q 344      30.720  16.442  68.940  1.00  0.00
ATOM   4260 C114 DPP Q 344      31.610  16.222  67.720  1.00  0.00
ATOM   4261 C115 DPP Q 344      32.750  17.232  67.560  1.00  0.00
ATOM   4262 C116 DPP Q 344      33.360  17.322  66.160  1.00  0.00
ATOM   4263  C33 DPP R 345       6.870   4.722  39.790  1.00  0.00
ATOM   4264  C34 DPP R 345       5.510   3.562  41.400  1.00  0.00
ATOM   4265  C35 DPP R 345       4.520   5.202  39.910  1.00  0.00
ATOM   4266  N   DPP R 345       5.540   4.162  40.060  1.00  0.00
ATOM   4267  C32 DPP R 345       5.290   3.022  39.160  1.00  0.00
ATOM   4268  C31 DPP R 345       3.880   2.452  39.110  1.00  0.00
ATOM   4269  O32 DPP R 345       3.410   1.832  40.320  1.00  0.00
ATOM   4270  P   DPP R 345       1.880   2.042  40.760  1.00  0.00
ATOM   4271  O33 DPP R 345       1.370   0.652  40.680  1.00  0.00
ATOM   4272  O34 DPP R 345       1.180   3.072  39.960  1.00  0.00
ATOM   4273  O31 DPP R 345       1.930   2.612  42.260  1.00  0.00
ATOM   4274  C3  DPP R 345       1.850   1.752  43.410  1.00  0.00
ATOM   4275  C2  DPP R 345       1.770   2.662  44.630  1.00  0.00
ATOM   4276  O21 DPP R 345       2.610   2.212  45.700  1.00  0.00
ATOM   4277  C21 DPP R 345       3.020   2.952  46.730  1.00  0.00
ATOM   4278  O22 DPP R 345       3.060   4.172  46.590  1.00  0.00
ATOM   4279  C22 DPP R 345       3.580   2.162  47.850  1.00  0.00
ATOM   4280  C23 DPP R 345       3.780   2.962  49.140  1.00  0.00
ATOM   4281  C24 DPP R 345       4.800   2.332  50.080  1.00  0.00
ATOM   4282  C25 DPP R 345       4.630   2.762  51.540  1.00  0.00
ATOM   4283  C26 DPP R 345       3.510   1.992  52.230  1.00  0.00
ATOM   4284  C27 DPP R 345       3.320   2.442  53.680  1.00  0.00
ATOM   4285  C28 DPP R 345       4.570   2.072  54.470  1.00  0.00
ATOM   4286  C29 DPP R 345       4.490   2.352  55.970  1.00  0.00
ATOM   4287 C210 DPP R 345       5.880   2.342  56.610  1.00  0.00
ATOM   4288 C211 DPP R 345       5.650   2.262  58.120  1.00  0.00
ATOM   4289 C212 DPP R 345       6.800   2.722  59.010  1.00  0.00
ATOM   4290 C213 DPP R 345       6.410   2.612  60.490  1.00  0.00
ATOM   4291 C214 DPP R 345       7.560   3.332  61.200  1.00  0.00
ATOM   4292 C215 DPP R 345       7.220   3.262  62.690  1.00  0.00
ATOM   4293 C216 DPP R 345       8.220   3.972  63.600  1.00  0.00
ATOM   4294  C1  DPP R 345       0.300   2.542  45.020  1.00  0.00
ATOM   4295  O11 DPP R 345       0.010   3.202  46.250  1.00  0.00
ATOM   4296  C11 DPP R 345      76.858   4.522  46.360  1.00  0.00
ATOM   4297  O12 DPP R 345      76.748   5.192  45.340  1.00  0.00
ATOM   4298  C12 DPP R 345      76.538   5.032  47.710  1.00  0.00
ATOM   4299  C13 DPP R 345       0.770   5.612  48.350  1.00  0.00
ATOM   4300  C14 DPP R 345       0.340   5.952  49.780  1.00  0.00
ATOM   4301  C15 DPP R 345       0.300   4.722  50.690  1.00  0.00
ATOM   4302  C16 DPP R 345      76.648   5.122  52.010  1.00  0.00
ATOM   4303  C17 DPP R 345       0.830   5.592  52.810  1.00  0.00
ATOM   4304  C18 DPP R 345       0.420   5.552  54.280  1.00  0.00
ATOM   4305  C19 DPP R 345       1.510   6.012  55.250  1.00  0.00
ATOM   4306 C110 DPP R 345       1.180   5.592  56.680  1.00  0.00
ATOM   4307 C111 DPP R 345       2.280   6.112  57.610  1.00  0.00
ATOM   4308 C112 DPP R 345       2.270   5.362  58.940  1.00  0.00
ATOM   4309 C113 DPP R 345       3.380   5.652  59.960  1.00  0.00
ATOM   4310 C114 DPP R 345       3.050   5.032  61.320  1.00  0.00
ATOM   4311 C115 DPP R 345       4.260   5.182  62.250  1.00  0.00
ATOM   4312 C116 DPP R 345       4.000   4.572  63.620  1.00  0.00
ATOM   4313  C33 DPP S 346       2.990  21.602  39.120  1.00  0.00
ATOM   4314  C34 DPP S 346       1.210  20.512  37.830  1.00  0.00
ATOM   4315  C35 DPP S 346       3.250  19.362  38.380  1.00  0.00
ATOM   4316  N   DPP S 346       2.260  20.352  38.850  1.00  0.00
ATOM   4317  C32 DPP S 346       1.660  19.832  40.090  1.00  0.00
ATOM   4318  C31 DPP S 346       0.970  20.812  41.040  1.00  0.00
ATOM   4319  O32 DPP S 346      76.758  21.162  40.430  1.00  0.00
ATOM   4320  P   DPP S 346      76.178  22.652  40.570  1.00  0.00
ATOM   4321  O33 DPP S 346      74.898  22.682  39.830  1.00  0.00
ATOM   4322  O34 DPP S 346       0.290  23.502  40.170  1.00  0.00
ATOM   4323  O31 DPP S 346      75.948  22.772  42.160  1.00  0.00
ATOM   4324  C3  DPP S 346      74.838  22.222  42.870  1.00  0.00
ATOM   4325  C2  DPP S 346      75.068  22.322  44.380  1.00  0.00
ATOM   4326  O21 DPP S 346      73.768  22.412  44.970  1.00  0.00
ATOM   4327  C21 DPP S 346      73.588  21.772  46.120  1.00  0.00
ATOM   4328  O22 DPP S 346      74.458  21.162  46.740  1.00  0.00
ATOM   4329  C22 DPP S 346      72.158  21.652  46.490  1.00  0.00
ATOM   4330  C23 DPP S 346      71.548  23.002  46.890  1.00  0.00
ATOM   4331  C24 DPP S 346      72.188  23.582  48.160  1.00  0.00
ATOM   4332  C25 DPP S 346      71.808  22.842  49.440  1.00  0.00
ATOM   4333  C26 DPP S 346      72.888  22.922  50.520  1.00  0.00
ATOM   4334  C27 DPP S 346      72.328  22.542  51.890  1.00  0.00
ATOM   4335  C28 DPP S 346      73.408  22.692  52.960  1.00  0.00
ATOM   4336  C29 DPP S 346      72.768  22.502  54.330  1.00  0.00
ATOM   4337 C210 DPP S 346      73.538  22.882  55.600  1.00  0.00
ATOM   4338 C211 DPP S 346      72.808  22.352  56.840  1.00  0.00
ATOM   4339 C212 DPP S 346      73.468  22.812  58.140  1.00  0.00
ATOM   4340 C213 DPP S 346      72.608  22.332  59.310  1.00  0.00
ATOM   4341 C214 DPP S 346      72.678  23.182  60.580  1.00  0.00
ATOM   4342 C215 DPP S 346      74.138  23.502  60.920  1.00  0.00
ATOM   4343 C216 DPP S 346      74.238  24.442  62.120  1.00  0.00
ATOM   4344  C1  DPP S 346      75.908  23.562  44.720  1.00  0.00
ATOM   4345  O11 DPP S 346      76.528  23.552  46.010  1.00  0.00
ATOM   4346  C11 DPP S 346      75.778  23.962  47.020  1.00  0.00
ATOM   4347  O12 DPP S 346      74.818  24.722  46.880  1.00  0.00
ATOM   4348  C12 DPP S 346      76.328  23.562  48.340  1.00  0.00
ATOM   4349  C13 DPP S 346      76.728  24.772  49.190  1.00  0.00
ATOM   4350  C14 DPP S 346      76.818  24.552  50.700  1.00  0.00
ATOM   4351  C15 DPP S 346       0.310  25.872  51.280  1.00  0.00
ATOM   4352  C16 DPP S 346       0.930  25.862  52.680  1.00  0.00
ATOM   4353  C17 DPP S 346      76.858  25.312  53.590  1.00  0.00
ATOM   4354  C18 DPP S 346       0.270  25.352  55.050  1.00  0.00
ATOM   4355  C19 DPP S 346       0.290  26.762  55.640  1.00  0.00
ATOM   4356 C110 DPP S 346       1.270  26.892  56.810  1.00  0.00
ATOM   4357 C111 DPP S 346       0.930  28.202  57.540  1.00  0.00
ATOM   4358 C112 DPP S 346       2.120  28.832  58.260  1.00  0.00
ATOM   4359 C113 DPP S 346       2.170  28.152  59.630  1.00  0.00
ATOM   4360 C114 DPP S 346       3.390  28.392  60.520  1.00  0.00
ATOM   4361 C115 DPP S 346       3.200  27.632  61.830  1.00  0.00
ATOM   4362 C116 DPP S 346       3.590  26.172  62.060  1.00  0.00
ATOM   4363  C33 DPP T 347       2.010  26.372  41.170  1.00  0.00
ATOM   4364  C34 DPP T 347       3.500  24.722  40.520  1.00  0.00
ATOM   4365  C35 DPP T 347       4.260  26.242  42.090  1.00  0.00
ATOM   4366  N   DPP T 347       3.060  25.492  41.700  1.00  0.00
ATOM   4367  C32 DPP T 347       2.490  24.642  42.750  1.00  0.00
ATOM   4368  C31 DPP T 347       3.260  23.362  43.060  1.00  0.00
ATOM   4369  O32 DPP T 347       4.580  23.442  43.600  1.00  0.00
ATOM   4370  P   DPP T 347       5.910  22.882  42.890  1.00  0.00
ATOM   4371  O33 DPP T 347       6.870  24.002  42.830  1.00  0.00
ATOM   4372  O34 DPP T 347       5.540  22.432  41.530  1.00  0.00
ATOM   4373  O31 DPP T 347       6.420  21.712  43.880  1.00  0.00
ATOM   4374  C3  DPP T 347       6.740  22.072  45.230  1.00  0.00
ATOM   4375  C2  DPP T 347       7.470  21.072  46.130  1.00  0.00
ATOM   4376  O21 DPP T 347       7.300  21.512  47.480  1.00  0.00
ATOM   4377  C21 DPP T 347       7.550  20.742  48.530  1.00  0.00
ATOM   4378  O22 DPP T 347       7.970  19.582  48.520  1.00  0.00
ATOM   4379  C22 DPP T 347       7.340  21.542  49.760  1.00  0.00
ATOM   4380  C23 DPP T 347       8.520  21.212  50.680  1.00  0.00
ATOM   4381  C24 DPP T 347       8.760  22.052  51.940  1.00  0.00
ATOM   4382  C25 DPP T 347       9.690  21.312  52.890  1.00  0.00
ATOM   4383  C26 DPP T 347       9.950  22.142  54.150  1.00  0.00
ATOM   4384  C27 DPP T 347      10.760  21.262  55.100  1.00  0.00
ATOM   4385  C28 DPP T 347      11.160  22.012  56.380  1.00  0.00
ATOM   4386  C29 DPP T 347      11.970  21.092  57.300  1.00  0.00
ATOM   4387 C210 DPP T 347      12.730  21.892  58.370  1.00  0.00
ATOM   4388 C211 DPP T 347      13.180  21.082  59.580  1.00  0.00
ATOM   4389 C212 DPP T 347      14.150  21.982  60.350  1.00  0.00
ATOM   4390 C213 DPP T 347      15.540  22.022  59.720  1.00  0.00
ATOM   4391 C214 DPP T 347      16.710  22.552  60.540  1.00  0.00
ATOM   4392 C215 DPP T 347      16.340  24.002  60.880  1.00  0.00
ATOM   4393 C216 DPP T 347      17.480  24.732  61.610  1.00  0.00
ATOM   4394  C1  DPP T 347       8.920  20.822  45.710  1.00  0.00
ATOM   4395  O11 DPP T 347       9.180  19.552  45.120  1.00  0.00
ATOM   4396  C11 DPP T 347      10.400  19.212  44.720  1.00  0.00
ATOM   4397  O12 DPP T 347      11.360  19.962  44.570  1.00  0.00
ATOM   4398  C12 DPP T 347      10.530  17.732  44.650  1.00  0.00
ATOM   4399  C13 DPP T 347      11.820  17.122  45.200  1.00  0.00
ATOM   4400  C14 DPP T 347      11.620  15.622  45.430  1.00  0.00
ATOM   4401  C15 DPP T 347      12.470  14.882  46.460  1.00  0.00
ATOM   4402  C16 DPP T 347      12.030  13.422  46.650  1.00  0.00
ATOM   4403  C17 DPP T 347      12.990  12.742  47.620  1.00  0.00
ATOM   4404  C18 DPP T 347      12.620  11.282  47.910  1.00  0.00
ATOM   4405  C19 DPP T 347      11.260  11.352  48.610  1.00  0.00
ATOM   4406 C110 DPP T 347      11.480  11.452  50.130  1.00  0.00
ATOM   4407 C111 DPP T 347      10.380  11.932  51.070  1.00  0.00
ATOM   4408 C112 DPP T 347      10.700  11.762  52.560  1.00  0.00
ATOM   4409 C113 DPP T 347      11.440  13.052  52.940  1.00  0.00
ATOM   4410 C114 DPP T 347      11.900  13.192  54.390  1.00  0.00
ATOM   4411 C115 DPP T 347      10.760  13.292  55.400  1.00  0.00
ATOM   4412 C116 DPP T 347      11.240  13.702  56.790  1.00  0.00
ATOM   4413  C33 DPP U 348      72.990  19.622  36.500  1.00  0.00
ATOM   4414  C34 DPP U 348      74.770  21.062  37.310  1.00  0.00
ATOM   4415  C35 DPP U 348      72.430  21.592  37.690  1.00  0.00
ATOM   4416  N   DPP U 348      73.430  20.522  37.580  1.00  0.00
ATOM   4417  C32 DPP U 348      73.430  19.872  38.900  1.00  0.00
ATOM   4418  C31 DPP U 348      74.060  18.492  39.080  1.00  0.00
ATOM   4419  O32 DPP U 348      75.490  18.372  39.050  1.00  0.00
ATOM   4420  P   DPP U 348      76.210  16.942  39.180  1.00  0.00
ATOM   4421  O33 DPP U 348       0.602  17.232  38.860  1.00  0.00
ATOM   4422  O34 DPP U 348      75.530  15.922  38.360  1.00  0.00
ATOM   4423  O31 DPP U 348      76.170  16.522  40.740  1.00  0.00
ATOM   4424  C3  DPP U 348      76.550  17.342  41.840  1.00  0.00
ATOM   4425  C2  DPP U 348      76.530  16.492  43.110  1.00  0.00
ATOM   4426  O21 DPP U 348      76.660  17.472  44.140  1.00  0.00
ATOM   4427  C21 DPP U 348      75.950  17.362  45.260  1.00  0.00
ATOM   4428  O22 DPP U 348      75.240  16.372  45.460  1.00  0.00
ATOM   4429  C22 DPP U 348      76.280  18.412  46.250  1.00  0.00
ATOM   4430  C23 DPP U 348      75.940  17.942  47.660  1.00  0.00
ATOM   4431  C24 DPP U 348      76.100  18.972  48.780  1.00  0.00
ATOM   4432  C25 DPP U 348      76.060  18.242  50.130  1.00  0.00
ATOM   4433  C26 DPP U 348      76.030  19.142  51.370  1.00  0.00
ATOM   4434  C27 DPP U 348      76.140  18.252  52.610  1.00  0.00
ATOM   4435  C28 DPP U 348      75.950  19.222  53.780  1.00  0.00
ATOM   4436  C29 DPP U 348      76.730  18.712  55.010  1.00  0.00
ATOM   4437 C210 DPP U 348      76.280  19.732  56.060  1.00  0.00
ATOM   4438 C211 DPP U 348      76.990  19.422  57.390  1.00  0.00
ATOM   4439 C212 DPP U 348       1.392  19.952  57.320  1.00  0.00
ATOM   4440 C213 DPP U 348       1.382  21.292  58.070  1.00  0.00
ATOM   4441 C214 DPP U 348       2.862  21.562  58.350  1.00  0.00
ATOM   4442 C215 DPP U 348       2.962  22.892  59.100  1.00  0.00
ATOM   4443 C216 DPP U 348       4.012  23.752  58.400  1.00  0.00
ATOM   4444  C1  DPP U 348       0.762  15.632  42.990  1.00  0.00
ATOM   4445  O11 DPP U 348       1.682  15.532  44.080  1.00  0.00
ATOM   4446  C11 DPP U 348       1.712  14.562  44.990  1.00  0.00
ATOM   4447  O12 DPP U 348       1.202  13.462  44.790  1.00  0.00
ATOM   4448  C12 DPP U 348       2.572  14.882  46.160  1.00  0.00
ATOM   4449  C13 DPP U 348       1.812  15.162  47.460  1.00  0.00
ATOM   4450  C14 DPP U 348       2.872  15.302  48.550  1.00  0.00
ATOM   4451  C15 DPP U 348       2.192  15.612  49.890  1.00  0.00
ATOM   4452  C16 DPP U 348       3.162  15.562  51.070  1.00  0.00
ATOM   4453  C17 DPP U 348       2.352  14.952  52.220  1.00  0.00
ATOM   4454  C18 DPP U 348       3.122  15.072  53.540  1.00  0.00
ATOM   4455  C19 DPP U 348       2.452  14.512  54.800  1.00  0.00
ATOM   4456 C110 DPP U 348       3.272  14.592  56.090  1.00  0.00
ATOM   4457 C111 DPP U 348       3.742  16.012  56.410  1.00  0.00
ATOM   4458 C112 DPP U 348       4.602  15.922  57.680  1.00  0.00
ATOM   4459 C113 DPP U 348       3.682  16.002  58.900  1.00  0.00
ATOM   4460 C114 DPP U 348       4.672  16.022  60.060  1.00  0.00
ATOM   4461 C115 DPP U 348       3.942  16.502  61.320  1.00  0.00
ATOM   4462 C116 DPP U 348       4.932  16.542  62.480  1.00  0.00
ATOM   4463  C33 DPP V 349       3.140  75.120  41.000  1.00  0.00
ATOM   4464  C34 DPP V 349       4.760  73.430  41.080  1.00  0.00
ATOM   4465  C35 DPP V 349       3.220  73.530  39.340  1.00  0.00
ATOM   4466  N   DPP V 349       4.090  74.370  40.160  1.00  0.00
ATOM   4467  C32 DPP V 349       4.900  75.180  39.230  1.00  0.00
ATOM   4468  C31 DPP V 349       5.540  76.420  39.840  1.00  0.00
ATOM   4469  O32 DPP V 349       6.410  76.070  40.920  1.00  0.00
ATOM   4470  P   DPP V 349       7.260   0.232  41.600  1.00  0.00
ATOM   4471  O33 DPP V 349       7.680   1.112  40.490  1.00  0.00
ATOM   4472  O34 DPP V 349       8.300  76.500  42.320  1.00  0.00
ATOM   4473  O31 DPP V 349       6.100   0.882  42.510  1.00  0.00
ATOM   4474  C3  DPP V 349       5.770   0.342  43.790  1.00  0.00
ATOM   4475  C2  DPP V 349       6.770   0.732  44.880  1.00  0.00
ATOM   4476  O21 DPP V 349       6.600  76.830  45.960  1.00  0.00
ATOM   4477  C21 DPP V 349       7.680  76.210  46.420  1.00  0.00
ATOM   4478  O22 DPP V 349       8.750  76.160  45.820  1.00  0.00
ATOM   4479  C22 DPP V 349       7.420  75.470  47.670  1.00  0.00
ATOM   4480  C23 DPP V 349       8.230  76.000  48.860  1.00  0.00
ATOM   4481  C24 DPP V 349       8.270  75.090  50.080  1.00  0.00
ATOM   4482  C25 DPP V 349       9.220  75.710  51.100  1.00  0.00
ATOM   4483  C26 DPP V 349       9.160  74.960  52.430  1.00  0.00
ATOM   4484  C27 DPP V 349       9.620  75.900  53.560  1.00  0.00
ATOM   4485  C28 DPP V 349       9.320  75.200  54.890  1.00  0.00
ATOM   4486  C29 DPP V 349       9.840  75.960  56.110  1.00  0.00
ATOM   4487 C210 DPP V 349       9.170  75.210  57.270  1.00  0.00
ATOM   4488 C211 DPP V 349       9.720  75.600  58.650  1.00  0.00
ATOM   4489 C212 DPP V 349       8.980  75.010  59.850  1.00  0.00
ATOM   4490 C213 DPP V 349       7.670  75.720  60.210  1.00  0.00
ATOM   4491 C214 DPP V 349       6.840  74.820  61.130  1.00  0.00
ATOM   4492 C215 DPP V 349       5.400  75.310  61.310  1.00  0.00
ATOM   4493 C216 DPP V 349       4.760  74.560  62.480  1.00  0.00
ATOM   4494  C1  DPP V 349       6.570   2.202  45.260  1.00  0.00
ATOM   4495  O11 DPP V 349       7.010   2.652  46.550  1.00  0.00
ATOM   4496  C11 DPP V 349       8.260   3.032  46.800  1.00  0.00
ATOM   4497  O12 DPP V 349       9.130   2.972  45.930  1.00  0.00
ATOM   4498  C12 DPP V 349       8.490   3.542  48.170  1.00  0.00
ATOM   4499  C13 DPP V 349       8.860   2.522  49.240  1.00  0.00
ATOM   4500  C14 DPP V 349       8.410   3.082  50.590  1.00  0.00
ATOM   4501  C15 DPP V 349       9.360   2.632  51.700  1.00  0.00
ATOM   4502  C16 DPP V 349       8.970   3.242  53.050  1.00  0.00
ATOM   4503  C17 DPP V 349      10.200   3.162  53.960  1.00  0.00
ATOM   4504  C18 DPP V 349       9.700   3.522  55.360  1.00  0.00
ATOM   4505  C19 DPP V 349      10.750   2.902  56.280  1.00  0.00
ATOM   4506 C110 DPP V 349      10.470   3.272  57.740  1.00  0.00
ATOM   4507 C111 DPP V 349      10.700   4.732  58.130  1.00  0.00
ATOM   4508 C112 DPP V 349      10.620   4.912  59.650  1.00  0.00
ATOM   4509 C113 DPP V 349      11.500   4.142  60.640  1.00  0.00
ATOM   4510 C114 DPP V 349      12.920   3.732  60.240  1.00  0.00
ATOM   4511 C115 DPP V 349      13.870   4.922  60.050  1.00  0.00
ATOM   4512 C116 DPP V 349      15.270   4.412  59.710  1.00  0.00
ATOM   4513  C33 DPP W 350       6.950   9.312  38.500  1.00  0.00
ATOM   4514  C34 DPP W 350       9.160   9.902  39.310  1.00  0.00
ATOM   4515  C35 DPP W 350       7.640  11.492  38.530  1.00  0.00
ATOM   4516  N   DPP W 350       7.740  10.252  39.310  1.00  0.00
ATOM   4517  C32 DPP W 350       7.140  10.542  40.620  1.00  0.00
ATOM   4518  C31 DPP W 350       6.650   9.362  41.470  1.00  0.00
ATOM   4519  O32 DPP W 350       7.650   8.372  41.770  1.00  0.00
ATOM   4520  P   DPP W 350       7.580   7.022  42.630  1.00  0.00
ATOM   4521  O33 DPP W 350       8.720   6.342  41.960  1.00  0.00
ATOM   4522  O34 DPP W 350       6.260   6.352  42.570  1.00  0.00
ATOM   4523  O31 DPP W 350       8.070   7.432  44.110  1.00  0.00
ATOM   4524  C3  DPP W 350       7.280   8.192  45.020  1.00  0.00
ATOM   4525  C2  DPP W 350       7.630   7.492  46.340  1.00  0.00
ATOM   4526  O21 DPP W 350       6.660   7.712  47.360  1.00  0.00
ATOM   4527  C21 DPP W 350       6.200   6.582  47.900  1.00  0.00
ATOM   4528  O22 DPP W 350       6.270   5.502  47.320  1.00  0.00
ATOM   4529  C22 DPP W 350       5.450   6.832  49.150  1.00  0.00
ATOM   4530  C23 DPP W 350       6.330   6.822  50.410  1.00  0.00
ATOM   4531  C24 DPP W 350       5.480   6.912  51.680  1.00  0.00
ATOM   4532  C25 DPP W 350       6.290   6.512  52.920  1.00  0.00
ATOM   4533  C26 DPP W 350       5.710   6.952  54.260  1.00  0.00
ATOM   4534  C27 DPP W 350       6.390   6.212  55.400  1.00  0.00
ATOM   4535  C28 DPP W 350       6.250   6.692  56.850  1.00  0.00
ATOM   4536  C29 DPP W 350       6.510   8.202  56.890  1.00  0.00
ATOM   4537 C210 DPP W 350       6.060   8.862  58.190  1.00  0.00
ATOM   4538 C211 DPP W 350       6.960   8.402  59.330  1.00  0.00
ATOM   4539 C212 DPP W 350       6.310   8.712  60.680  1.00  0.00
ATOM   4540 C213 DPP W 350       7.150   8.292  61.890  1.00  0.00
ATOM   4541 C214 DPP W 350       6.660   8.762  63.260  1.00  0.00
ATOM   4542 C215 DPP W 350       6.990   7.762  64.380  1.00  0.00
ATOM   4543 C216 DPP W 350       8.430   7.692  64.870  1.00  0.00
ATOM   4544  C1  DPP W 350       8.980   8.012  46.840  1.00  0.00
ATOM   4545  O11 DPP W 350       9.340   7.212  47.970  1.00  0.00
ATOM   4546  C11 DPP W 350      10.580   7.342  48.430  1.00  0.00
ATOM   4547  O12 DPP W 350      11.470   7.712  47.660  1.00  0.00
ATOM   4548  C12 DPP W 350      10.900   6.812  49.770  1.00  0.00
ATOM   4549  C13 DPP W 350      10.220   7.732  50.800  1.00  0.00
ATOM   4550  C14 DPP W 350      10.830   7.322  52.140  1.00  0.00
ATOM   4551  C15 DPP W 350      10.350   8.262  53.250  1.00  0.00
ATOM   4552  C16 DPP W 350      11.110   7.982  54.550  1.00  0.00
ATOM   4553  C17 DPP W 350      10.580   8.892  55.660  1.00  0.00
ATOM   4554  C18 DPP W 350      11.390   8.622  56.930  1.00  0.00
ATOM   4555  C19 DPP W 350      10.800   9.432  58.080  1.00  0.00
ATOM   4556 C110 DPP W 350      11.600   9.302  59.380  1.00  0.00
ATOM   4557 C111 DPP W 350      10.830   9.832  60.590  1.00  0.00
ATOM   4558 C112 DPP W 350      11.670   9.572  61.840  1.00  0.00
ATOM   4559 C113 DPP W 350      11.830   8.072  62.100  1.00  0.00
ATOM   4560 C114 DPP W 350      12.670   7.872  63.360  1.00  0.00
ATOM   4561 C115 DPP W 350      12.650   6.382  63.720  1.00  0.00
ATOM   4562 C116 DPP W 350      13.620   6.232  64.890  1.00  0.00
ATOM   4563  C33 DPP X 351      20.360  70.650  42.480  1.00  0.00
ATOM   4564  C34 DPP X 351      22.000  69.370  41.540  1.00  0.00
ATOM   4565  C35 DPP X 351      20.080  70.090  40.150  1.00  0.00
ATOM   4566  N   DPP X 351      21.050  70.440  41.200  1.00  0.00
ATOM   4567  C32 DPP X 351      21.810  71.610  40.730  1.00  0.00
ATOM   4568  C31 DPP X 351      21.060  72.720  39.980  1.00  0.00
ATOM   4569  O32 DPP X 351      19.820  73.190  40.520  1.00  0.00
ATOM   4570  P   DPP X 351      19.790  74.530  41.410  1.00  0.00
ATOM   4571  O33 DPP X 351      18.380  74.920  41.670  1.00  0.00
ATOM   4572  O34 DPP X 351      20.710  75.510  40.780  1.00  0.00
ATOM   4573  O31 DPP X 351      20.400  73.930  42.770  1.00  0.00
ATOM   4574  C3  DPP X 351      21.550  74.490  43.410  1.00  0.00
ATOM   4575  C2  DPP X 351      21.710  73.910  44.820  1.00  0.00
ATOM   4576  O21 DPP X 351      20.650  74.460  45.610  1.00  0.00
ATOM   4577  C21 DPP X 351      19.520  73.790  45.840  1.00  0.00
ATOM   4578  O22 DPP X 351      19.400  72.590  45.640  1.00  0.00
ATOM   4579  C22 DPP X 351      18.640  74.510  46.790  1.00  0.00
ATOM   4580  C23 DPP X 351      19.170  74.440  48.220  1.00  0.00
ATOM   4581  C24 DPP X 351      18.450  75.340  49.240  1.00  0.00
ATOM   4582  C25 DPP X 351      19.010  75.210  50.660  1.00  0.00
ATOM   4583  C26 DPP X 351      18.330  76.120  51.670  1.00  0.00
ATOM   4584  C27 DPP X 351      18.970  76.190  53.060  1.00  0.00
ATOM   4585  C28 DPP X 351      17.980  76.510  54.190  1.00  0.00
ATOM   4586  C29 DPP X 351      18.670  76.400  55.550  1.00  0.00
ATOM   4587 C210 DPP X 351      18.370   0.632  56.360  1.00  0.00
ATOM   4588 C211 DPP X 351      18.880   0.652  57.800  1.00  0.00
ATOM   4589 C212 DPP X 351      18.050  76.580  58.480  1.00  0.00
ATOM   4590 C213 DPP X 351      18.140  76.500  60.000  1.00  0.00
ATOM   4591 C214 DPP X 351      17.830   0.822  60.660  1.00  0.00
ATOM   4592 C215 DPP X 351      17.410   0.482  62.100  1.00  0.00
ATOM   4593 C216 DPP X 351      16.670   1.692  62.680  1.00  0.00
ATOM   4594  C1  DPP X 351      23.020  74.420  45.430  1.00  0.00
ATOM   4595  O11 DPP X 351      23.360  73.850  46.690  1.00  0.00
ATOM   4596  C11 DPP X 351      24.500  74.240  47.260  1.00  0.00
ATOM   4597  O12 DPP X 351      25.190  75.200  46.940  1.00  0.00
ATOM   4598  C12 DPP X 351      24.770  73.480  48.500  1.00  0.00
ATOM   4599  C13 DPP X 351      23.770  73.920  49.570  1.00  0.00
ATOM   4600  C14 DPP X 351      24.200  73.520  50.980  1.00  0.00
ATOM   4601  C15 DPP X 351      23.100  73.940  51.970  1.00  0.00
ATOM   4602  C16 DPP X 351      23.650  73.350  53.270  1.00  0.00
ATOM   4603  C17 DPP X 351      22.570  73.720  54.300  1.00  0.00
ATOM   4604  C18 DPP X 351      22.780  73.190  55.720  1.00  0.00
ATOM   4605  C19 DPP X 351      21.670  73.290  56.770  1.00  0.00
ATOM   4606 C110 DPP X 351      22.100  72.510  58.020  1.00  0.00
ATOM   4607 C111 DPP X 351      21.030  72.850  59.050  1.00  0.00
ATOM   4608 C112 DPP X 351      21.710  72.550  60.390  1.00  0.00
ATOM   4609 C113 DPP X 351      20.750  72.740  61.560  1.00  0.00
ATOM   4610 C114 DPP X 351      21.260  72.170  62.890  1.00  0.00
ATOM   4611 C115 DPP X 351      22.550  72.880  63.320  1.00  0.00
ATOM   4612 C116 DPP X 351      22.570  72.810  64.850  1.00  0.00
ATOM   4613  C33 DPP Y 352      13.110   8.732  44.260  1.00  0.00
ATOM   4614  C34 DPP Y 352      12.550   9.912  42.260  1.00  0.00
ATOM   4615  C35 DPP Y 352      11.040   8.332  43.050  1.00  0.00
ATOM   4616  N   DPP Y 352      12.010   9.332  43.500  1.00  0.00
ATOM   4617  C32 DPP Y 352      11.450  10.422  44.320  1.00  0.00
ATOM   4618  C31 DPP Y 352      10.020  10.912  44.110  1.00  0.00
ATOM   4619  O32 DPP Y 352       9.690  11.332  42.790  1.00  0.00
ATOM   4620  P   DPP Y 352       9.980  12.752  42.080  1.00  0.00
ATOM   4621  O33 DPP Y 352       9.390  12.832  40.730  1.00  0.00
ATOM   4622  O34 DPP Y 352      11.440  13.012  42.140  1.00  0.00
ATOM   4623  O31 DPP Y 352       9.220  13.822  43.020  1.00  0.00
ATOM   4624  C3  DPP Y 352       7.800  13.982  43.000  1.00  0.00
ATOM   4625  C2  DPP Y 352       7.310  15.322  43.550  1.00  0.00
ATOM   4626  O21 DPP Y 352       7.150  15.202  44.960  1.00  0.00
ATOM   4627  C21 DPP Y 352       7.090  16.182  45.860  1.00  0.00
ATOM   4628  O22 DPP Y 352       7.330  17.342  45.530  1.00  0.00
ATOM   4629  C22 DPP Y 352       6.790  15.672  47.210  1.00  0.00
ATOM   4630  C23 DPP Y 352       7.580  16.472  48.250  1.00  0.00
ATOM   4631  C24 DPP Y 352       7.210  15.982  49.650  1.00  0.00
ATOM   4632  C25 DPP Y 352       8.070  16.722  50.680  1.00  0.00
ATOM   4633  C26 DPP Y 352       7.710  16.272  52.100  1.00  0.00
ATOM   4634  C27 DPP Y 352       8.170  17.282  53.150  1.00  0.00
ATOM   4635  C28 DPP Y 352       8.220  16.682  54.560  1.00  0.00
ATOM   4636  C29 DPP Y 352       8.900  17.532  55.640  1.00  0.00
ATOM   4637 C210 DPP Y 352       9.360  16.932  56.970  1.00  0.00
ATOM   4638 C211 DPP Y 352      10.080  17.872  57.940  1.00  0.00
ATOM   4639 C212 DPP Y 352      10.000  17.222  59.320  1.00  0.00
ATOM   4640 C213 DPP Y 352      10.580  18.312  60.220  1.00  0.00
ATOM   4641 C214 DPP Y 352      10.130  18.192  61.680  1.00  0.00
ATOM   4642 C215 DPP Y 352      10.650  19.352  62.530  1.00  0.00
ATOM   4643 C216 DPP Y 352      10.350  20.812  62.200  1.00  0.00
ATOM   4644  C1  DPP Y 352       5.970  15.672  42.900  1.00  0.00
ATOM   4645  O11 DPP Y 352       5.700  17.072  43.010  1.00  0.00
ATOM   4646  C11 DPP Y 352       4.740  17.572  42.230  1.00  0.00
ATOM   4647  O12 DPP Y 352       4.400  17.002  41.200  1.00  0.00
ATOM   4648  C12 DPP Y 352       4.210  18.872  42.710  1.00  0.00
ATOM   4649  C13 DPP Y 352       3.890  18.852  44.200  1.00  0.00
ATOM   4650  C14 DPP Y 352       3.270  20.132  44.750  1.00  0.00
ATOM   4651  C15 DPP Y 352       2.700  19.792  46.130  1.00  0.00
ATOM   4652  C16 DPP Y 352       3.730  19.702  47.260  1.00  0.00
ATOM   4653  C17 DPP Y 352       3.000  19.862  48.600  1.00  0.00
ATOM   4654  C18 DPP Y 352       3.790  20.332  49.820  1.00  0.00
ATOM   4655  C19 DPP Y 352       3.070  20.622  51.140  1.00  0.00
ATOM   4656 C110 DPP Y 352       3.910  21.292  52.230  1.00  0.00
ATOM   4657 C111 DPP Y 352       4.740  20.362  53.120  1.00  0.00
ATOM   4658 C112 DPP Y 352       5.280  21.112  54.350  1.00  0.00
ATOM   4659 C113 DPP Y 352       5.780  20.262  55.520  1.00  0.00
ATOM   4660 C114 DPP Y 352       6.310  21.212  56.580  1.00  0.00
ATOM   4661 C115 DPP Y 352       7.330  20.672  57.590  1.00  0.00
ATOM   4662 C116 DPP Y 352       7.640  21.752  58.640  1.00  0.00
ATOM   4663  C33 DPP Z 353      18.290   1.812  41.990  1.00  0.00
ATOM   4664  C34 DPP Z 353      17.620   0.082  43.390  1.00  0.00
ATOM   4665  C35 DPP Z 353      16.940   2.382  43.800  1.00  0.00
ATOM   4666  N   DPP Z 353      17.150   1.332  42.790  1.00  0.00
ATOM   4667  C32 DPP Z 353      16.100   1.152  41.770  1.00  0.00
ATOM   4668  C31 DPP Z 353      14.710   0.772  42.270  1.00  0.00
ATOM   4669  O32 DPP Z 353      14.490  76.530  42.890  1.00  0.00
ATOM   4670  P   DPP Z 353      13.050  76.080  43.460  1.00  0.00
ATOM   4671  O33 DPP Z 353      13.150  74.730  44.060  1.00  0.00
ATOM   4672  O34 DPP Z 353      12.090  76.450  42.400  1.00  0.00
ATOM   4673  O31 DPP Z 353      12.890   0.072  44.710  1.00  0.00
ATOM   4674  C3  DPP Z 353      12.610  76.690  46.050  1.00  0.00
ATOM   4675  C2  DPP Z 353      13.450   0.382  47.100  1.00  0.00
ATOM   4676  O21 DPP Z 353      13.130  76.820  48.360  1.00  0.00
ATOM   4677  C21 DPP Z 353      14.080  76.720  49.280  1.00  0.00
ATOM   4678  O22 DPP Z 353      15.230   0.062  49.080  1.00  0.00
ATOM   4679  C22 DPP Z 353      13.690  75.830  50.400  1.00  0.00
ATOM   4680  C23 DPP Z 353      14.450  76.090  51.710  1.00  0.00
ATOM   4681  C24 DPP Z 353      13.610   0.172  52.360  1.00  0.00
ATOM   4682  C25 DPP Z 353      14.110   0.652  53.720  1.00  0.00
ATOM   4683  C26 DPP Z 353      13.650  76.870  54.930  1.00  0.00
ATOM   4684  C27 DPP Z 353      13.930   0.602  56.220  1.00  0.00
ATOM   4685  C28 DPP Z 353      13.560  76.750  57.420  1.00  0.00
ATOM   4686  C29 DPP Z 353      14.080   0.282  58.740  1.00  0.00
ATOM   4687 C210 DPP Z 353      13.720  76.390  59.920  1.00  0.00
ATOM   4688 C211 DPP Z 353      13.370   0.262  61.110  1.00  0.00
ATOM   4689 C212 DPP Z 353      12.370  76.640  62.070  1.00  0.00
ATOM   4690 C213 DPP Z 353      12.090   0.492  63.290  1.00  0.00
ATOM   4691 C214 DPP Z 353      11.040  76.920  64.230  1.00  0.00
ATOM   4692 C215 DPP Z 353       9.730  76.830  63.440  1.00  0.00
ATOM   4693 C216 DPP Z 353       8.620  76.500  64.430  1.00  0.00
ATOM   4694  C1  DPP Z 353      13.060   1.862  47.100  1.00  0.00
ATOM   4695  O11 DPP Z 353      13.790   2.722  47.980  1.00  0.00
ATOM   4696  C11 DPP Z 353      13.170   3.332  48.990  1.00  0.00
ATOM   4697  O12 DPP Z 353      11.940   3.382  49.020  1.00  0.00
ATOM   4698  C12 DPP Z 353      13.950   4.062  50.010  1.00  0.00
ATOM   4699  C13 DPP Z 353      13.550   4.052  51.490  1.00  0.00
ATOM   4700  C14 DPP Z 353      14.480   4.942  52.320  1.00  0.00
ATOM   4701  C15 DPP Z 353      14.160   5.002  53.810  1.00  0.00
ATOM   4702  C16 DPP Z 353      15.190   5.902  54.490  1.00  0.00
ATOM   4703  C17 DPP Z 353      14.820   6.112  55.960  1.00  0.00
ATOM   4704  C18 DPP Z 353      15.790   7.162  56.510  1.00  0.00
ATOM   4705  C19 DPP Z 353      15.230   7.572  57.870  1.00  0.00
ATOM   4706 C110 DPP Z 353      15.980   8.672  58.620  1.00  0.00
ATOM   4707 C111 DPP Z 353      15.440   8.912  60.030  1.00  0.00
ATOM   4708 C112 DPP Z 353      16.450   9.842  60.700  1.00  0.00
ATOM   4709 C113 DPP Z 353      16.220   9.892  62.210  1.00  0.00
ATOM   4710 C114 DPP Z 353      17.270  10.692  62.990  1.00  0.00
ATOM   4711 C115 DPP Z 353      16.810  10.862  64.440  1.00  0.00
ATOM   4712 C116 DPP Z 353      18.040  11.032  65.340  1.00  0.00
ATOM   4713  C33 DPP   354       9.390   3.172  41.720  1.00  0.00
ATOM   4714  C34 DPP   354      10.510   1.882  43.280  1.00  0.00
ATOM   4715  C35 DPP   354      11.720   3.102  41.490  1.00  0.00
ATOM   4716  N   DPP   354      10.640   3.122  42.490  1.00  0.00
ATOM   4717  C32 DPP   354      10.780   4.292  43.370  1.00  0.00
ATOM   4718  C31 DPP   354      11.870   4.332  44.450  1.00  0.00
ATOM   4719  O32 DPP   354      13.200   4.002  44.030  1.00  0.00
ATOM   4720  P   DPP   354      14.150   5.152  43.430  1.00  0.00
ATOM   4721  O33 DPP   354      13.250   5.972  42.600  1.00  0.00
ATOM   4722  O34 DPP   354      15.360   4.582  42.800  1.00  0.00
ATOM   4723  O31 DPP   354      14.490   5.862  44.840  1.00  0.00
ATOM   4724  C3  DPP   354      15.340   5.292  45.840  1.00  0.00
ATOM   4725  C2  DPP   354      16.210   6.272  46.630  1.00  0.00
ATOM   4726  O21 DPP   354      17.440   5.682  47.070  1.00  0.00
ATOM   4727  C21 DPP   354      18.380   6.622  47.180  1.00  0.00
ATOM   4728  O22 DPP   354      18.510   7.602  46.440  1.00  0.00
ATOM   4729  C22 DPP   354      19.550   6.112  47.920  1.00  0.00
ATOM   4730  C23 DPP   354      20.200   7.092  48.900  1.00  0.00
ATOM   4731  C24 DPP   354      19.440   7.082  50.220  1.00  0.00
ATOM   4732  C25 DPP   354      20.290   7.882  51.220  1.00  0.00
ATOM   4733  C26 DPP   354      19.700   7.822  52.630  1.00  0.00
ATOM   4734  C27 DPP   354      20.290   8.882  53.550  1.00  0.00
ATOM   4735  C28 DPP   354      19.770   8.702  54.980  1.00  0.00
ATOM   4736  C29 DPP   354      20.650   9.712  55.720  1.00  0.00
ATOM   4737 C210 DPP   354      20.490   9.462  57.220  1.00  0.00
ATOM   4738 C211 DPP   354      21.680  10.002  58.010  1.00  0.00
ATOM   4739 C212 DPP   354      21.350   9.882  59.500  1.00  0.00
ATOM   4740 C213 DPP   354      22.490  10.202  60.470  1.00  0.00
ATOM   4741 C214 DPP   354      22.010   9.682  61.820  1.00  0.00
ATOM   4742 C215 DPP   354      23.090   9.872  62.890  1.00  0.00
ATOM   4743 C216 DPP   354      22.370   9.952  64.240  1.00  0.00
ATOM   4744  C1  DPP   354      15.270   6.902  47.660  1.00  0.00
ATOM   4745  O11 DPP   354      16.020   7.572  48.690  1.00  0.00
ATOM   4746  C11 DPP   354      15.340   8.122  49.690  1.00  0.00
ATOM   4747  O12 DPP   354      14.120   8.062  49.870  1.00  0.00
ATOM   4748  C12 DPP   354      16.240   8.652  50.740  1.00  0.00
ATOM   4749  C13 DPP   354      15.780  10.072  51.070  1.00  0.00
ATOM   4750  C14 DPP   354      16.570  10.692  52.230  1.00  0.00
ATOM   4751  C15 DPP   354      15.590  10.922  53.380  1.00  0.00
ATOM   4752  C16 DPP   354      16.290  11.552  54.580  1.00  0.00
ATOM   4753  C17 DPP   354      16.610  13.022  54.270  1.00  0.00
ATOM   4754  C18 DPP   354      17.740  13.602  55.120  1.00  0.00
ATOM   4755  C19 DPP   354      17.430  13.352  56.600  1.00  0.00
ATOM   4756 C110 DPP   354      18.590  13.812  57.490  1.00  0.00
ATOM   4757 C111 DPP   354      18.310  13.392  58.940  1.00  0.00
ATOM   4758 C112 DPP   354      19.390  14.042  59.810  1.00  0.00
ATOM   4759 C113 DPP   354      19.240  13.692  61.290  1.00  0.00
ATOM   4760 C114 DPP   354      20.590  13.912  61.990  1.00  0.00
ATOM   4761 C115 DPP   354      20.460  13.622  63.490  1.00  0.00
ATOM   4762 C116 DPP   354      21.850  13.532  64.120  1.00  0.00
ATOM   4763  C33 DPP   355      13.860  16.482  41.040  1.00  0.00
ATOM   4764  C34 DPP   355      13.670  14.122  40.430  1.00  0.00
ATOM   4765  C35 DPP   355      15.790  15.032  40.530  1.00  0.00
ATOM   4766  N   DPP   355      14.450  15.142  41.130  1.00  0.00
ATOM   4767  C32 DPP   355      14.280  14.882  42.570  1.00  0.00
ATOM   4768  C31 DPP   355      14.990  13.782  43.360  1.00  0.00
ATOM   4769  O32 DPP   355      14.850  12.442  42.890  1.00  0.00
ATOM   4770  P   DPP   355      15.900  11.392  43.520  1.00  0.00
ATOM   4771  O33 DPP   355      17.230  11.842  43.060  1.00  0.00
ATOM   4772  O34 DPP   355      15.440  10.042  43.110  1.00  0.00
ATOM   4773  O31 DPP   355      15.380  11.502  45.040  1.00  0.00
ATOM   4774  C3  DPP   355      16.030  10.882  46.160  1.00  0.00
ATOM   4775  C2  DPP   355      17.220  11.712  46.620  1.00  0.00
ATOM   4776  O21 DPP   355      17.900  11.182  47.760  1.00  0.00
ATOM   4777  C21 DPP   355      19.200  11.472  47.780  1.00  0.00
ATOM   4778  O22 DPP   355      19.900  11.472  46.770  1.00  0.00
ATOM   4779  C22 DPP   355      19.800  11.072  49.080  1.00  0.00
ATOM   4780  C23 DPP   355      20.630  12.282  49.540  1.00  0.00
ATOM   4781  C24 DPP   355      20.630  12.152  51.060  1.00  0.00
ATOM   4782  C25 DPP   355      21.040  13.502  51.650  1.00  0.00
ATOM   4783  C26 DPP   355      21.090  13.392  53.180  1.00  0.00
ATOM   4784  C27 DPP   355      21.800  14.612  53.770  1.00  0.00
ATOM   4785  C28 DPP   355      22.180  14.422  55.240  1.00  0.00
ATOM   4786  C29 DPP   355      22.250  15.842  55.800  1.00  0.00
ATOM   4787 C210 DPP   355      22.550  15.622  57.280  1.00  0.00
ATOM   4788 C211 DPP   355      22.810  16.932  58.030  1.00  0.00
ATOM   4789 C212 DPP   355      22.980  16.892  59.550  1.00  0.00
ATOM   4790 C213 DPP   355      23.660  18.172  60.020  1.00  0.00
ATOM   4791 C214 DPP   355      23.380  18.372  61.510  1.00  0.00
ATOM   4792 C215 DPP   355      24.000  19.692  61.980  1.00  0.00
ATOM   4793 C216 DPP   355      25.520  19.762  61.850  1.00  0.00
ATOM   4794  C1  DPP   355      16.780  13.162  46.830  1.00  0.00
ATOM   4795  O11 DPP   355      17.740  14.142  47.240  1.00  0.00
ATOM   4796  C11 DPP   355      17.280  15.292  47.730  1.00  0.00
ATOM   4797  O12 DPP   355      16.190  15.682  47.310  1.00  0.00
ATOM   4798  C12 DPP   355      18.450  16.132  48.060  1.00  0.00
ATOM   4799  C13 DPP   355      18.390  16.592  49.510  1.00  0.00
ATOM   4800  C14 DPP   355      17.260  17.592  49.750  1.00  0.00
ATOM   4801  C15 DPP   355      16.890  17.672  51.230  1.00  0.00
ATOM   4802  C16 DPP   355      18.120  18.072  52.040  1.00  0.00
ATOM   4803  C17 DPP   355      17.950  18.302  53.550  1.00  0.00
ATOM   4804  C18 DPP   355      19.270  18.012  54.250  1.00  0.00
ATOM   4805  C19 DPP   355      19.150  18.712  55.600  1.00  0.00
ATOM   4806 C110 DPP   355      19.310  20.232  55.630  1.00  0.00
ATOM   4807 C111 DPP   355      19.200  20.622  57.110  1.00  0.00
ATOM   4808 C112 DPP   355      20.430  20.162  57.890  1.00  0.00
ATOM   4809 C113 DPP   355      20.130  20.232  59.380  1.00  0.00
ATOM   4810 C114 DPP   355      19.230  19.092  59.870  1.00  0.00
ATOM   4811 C115 DPP   355      19.270  18.922  61.390  1.00  0.00
ATOM   4812 C116 DPP   355      18.670  17.562  61.740  1.00  0.00
ATOM   4813  C33 DPP   356      16.780  72.920  43.340  1.00  0.00
ATOM   4814  C34 DPP   356      15.410  73.810  41.580  1.00  0.00
ATOM   4815  C35 DPP   356      16.380  71.670  41.240  1.00  0.00
ATOM   4816  N   DPP   356      15.850  72.590  42.260  1.00  0.00
ATOM   4817  C32 DPP   356      14.610  72.110  42.910  1.00  0.00
ATOM   4818  C31 DPP   356      13.330  71.820  42.130  1.00  0.00
ATOM   4819  O32 DPP   356      13.400  70.530  41.530  1.00  0.00
ATOM   4820  P   DPP   356      12.130  69.740  40.940  1.00  0.00
ATOM   4821  O33 DPP   356      12.490  68.390  40.440  1.00  0.00
ATOM   4822  O34 DPP   356      11.630  70.740  39.970  1.00  0.00
ATOM   4823  O31 DPP   356      11.160  69.550  42.200  1.00  0.00
ATOM   4824  C3  DPP   356      11.600  68.530  43.100  1.00  0.00
ATOM   4825  C2  DPP   356      10.630  68.120  44.210  1.00  0.00
ATOM   4826  O21 DPP   356      11.390  67.200  45.010  1.00  0.00
ATOM   4827  C21 DPP   356      10.990  67.160  46.270  1.00  0.00
ATOM   4828  O22 DPP   356      10.100  67.830  46.800  1.00  0.00
ATOM   4829  C22 DPP   356      11.800  66.200  47.050  1.00  0.00
ATOM   4830  C23 DPP   356      13.000  66.900  47.690  1.00  0.00
ATOM   4831  C24 DPP   356      12.930  67.530  49.080  1.00  0.00
ATOM   4832  C25 DPP   356      12.480  66.510  50.130  1.00  0.00
ATOM   4833  C26 DPP   356      12.700  67.070  51.540  1.00  0.00
ATOM   4834  C27 DPP   356      12.280  65.960  52.510  1.00  0.00
ATOM   4835  C28 DPP   356      11.960  66.530  53.890  1.00  0.00
ATOM   4836  C29 DPP   356      11.510  65.490  54.920  1.00  0.00
ATOM   4837 C210 DPP   356      11.110  66.320  56.140  1.00  0.00
ATOM   4838 C211 DPP   356      12.300  67.050  56.780  1.00  0.00
ATOM   4839 C212 DPP   356      11.970  67.640  58.150  1.00  0.00
ATOM   4840 C213 DPP   356      11.790  66.480  59.130  1.00  0.00
ATOM   4841 C214 DPP   356      11.240  67.020  60.460  1.00  0.00
ATOM   4842 C215 DPP   356      10.670  65.900  61.330  1.00  0.00
ATOM   4843 C216 DPP   356      10.750  66.530  62.720  1.00  0.00
ATOM   4844  C1  DPP   356       9.480  67.370  43.520  1.00  0.00
ATOM   4845  O11 DPP   356       8.380  67.200  44.420  1.00  0.00
ATOM   4846  C11 DPP   356       7.480  66.220  44.370  1.00  0.00
ATOM   4847  O12 DPP   356       7.740  65.170  43.790  1.00  0.00
ATOM   4848  C12 DPP   356       6.350  66.370  45.310  1.00  0.00
ATOM   4849  C13 DPP   356       6.500  65.400  46.490  1.00  0.00
ATOM   4850  C14 DPP   356       5.900  66.070  47.730  1.00  0.00
ATOM   4851  C15 DPP   356       6.510  65.570  49.040  1.00  0.00
ATOM   4852  C16 DPP   356       6.200  66.160  50.420  1.00  0.00
ATOM   4853  C17 DPP   356       4.720  66.100  50.810  1.00  0.00
ATOM   4854  C18 DPP   356       4.410  66.890  52.080  1.00  0.00
ATOM   4855  C19 DPP   356       2.990  66.810  52.640  1.00  0.00
ATOM   4856 C110 DPP   356       2.520  67.500  53.920  1.00  0.00
ATOM   4857 C111 DPP   356       2.570  69.020  53.730  1.00  0.00
ATOM   4858 C112 DPP   356       3.570  69.760  54.620  1.00  0.00
ATOM   4859 C113 DPP   356       3.150  69.540  56.070  1.00  0.00
ATOM   4860 C114 DPP   356       4.090  70.250  57.050  1.00  0.00
ATOM   4861 C115 DPP   356       3.630  69.770  58.430  1.00  0.00
ATOM   4862 C116 DPP   356       3.830  68.290  58.760  1.00  0.00
ATOM   4863  C33 DPP   357      20.860   7.212  41.450  1.00  0.00
ATOM   4864  C34 DPP   357      19.640   9.082  42.090  1.00  0.00
ATOM   4865  C35 DPP   357      18.630   6.892  42.500  1.00  0.00
ATOM   4866  N   DPP   357      19.880   7.672  42.430  1.00  0.00
ATOM   4867  C32 DPP   357      20.450   7.522  43.780  1.00  0.00
ATOM   4868  C31 DPP   357      21.490   8.532  44.300  1.00  0.00
ATOM   4869  O32 DPP   357      22.810   8.412  43.780  1.00  0.00
ATOM   4870  P   DPP   357      23.480   9.702  43.080  1.00  0.00
ATOM   4871  O33 DPP   357      22.790  10.342  41.930  1.00  0.00
ATOM   4872  O34 DPP   357      24.820   9.232  42.690  1.00  0.00
ATOM   4873  O31 DPP   357      23.610  10.782  44.270  1.00  0.00
ATOM   4874  C3  DPP   357      24.410  10.612  45.440  1.00  0.00
ATOM   4875  C2  DPP   357      24.460  11.972  46.140  1.00  0.00
ATOM   4876  O21 DPP   357      25.380  11.972  47.240  1.00  0.00
ATOM   4877  C21 DPP   357      26.060  13.052  47.610  1.00  0.00
ATOM   4878  O22 DPP   357      26.000  14.172  47.110  1.00  0.00
ATOM   4879  C22 DPP   357      26.570  12.852  48.990  1.00  0.00
ATOM   4880  C23 DPP   357      26.140  13.962  49.940  1.00  0.00
ATOM   4881  C24 DPP   357      26.970  13.842  51.230  1.00  0.00
ATOM   4882  C25 DPP   357      26.400  14.812  52.260  1.00  0.00
ATOM   4883  C26 DPP   357      26.890  14.462  53.660  1.00  0.00
ATOM   4884  C27 DPP   357      26.720  15.622  54.650  1.00  0.00
ATOM   4885  C28 DPP   357      27.280  15.322  56.040  1.00  0.00
ATOM   4886  C29 DPP   357      27.410  16.592  56.890  1.00  0.00
ATOM   4887 C210 DPP   357      27.840  16.342  58.330  1.00  0.00
ATOM   4888 C211 DPP   357      27.820  17.562  59.260  1.00  0.00
ATOM   4889 C212 DPP   357      28.900  18.462  58.670  1.00  0.00
ATOM   4890 C213 DPP   357      29.030  19.842  59.320  1.00  0.00
ATOM   4891 C214 DPP   357      29.800  19.632  60.630  1.00  0.00
ATOM   4892 C215 DPP   357      30.220  20.842  61.470  1.00  0.00
ATOM   4893 C216 DPP   357      29.080  21.512  62.240  1.00  0.00
ATOM   4894  C1  DPP   357      23.090  12.542  46.500  1.00  0.00
ATOM   4895  O11 DPP   357      23.200  13.872  47.010  1.00  0.00
ATOM   4896  C11 DPP   357      22.170  14.692  47.180  1.00  0.00
ATOM   4897  O12 DPP   357      21.000  14.422  46.930  1.00  0.00
ATOM   4898  C12 DPP   357      22.750  15.952  47.710  1.00  0.00
ATOM   4899  C13 DPP   357      22.450  16.302  49.170  1.00  0.00
ATOM   4900  C14 DPP   357      23.330  17.432  49.680  1.00  0.00
ATOM   4901  C15 DPP   357      23.070  17.622  51.180  1.00  0.00
ATOM   4902  C16 DPP   357      24.080  18.542  51.870  1.00  0.00
ATOM   4903  C17 DPP   357      23.830  18.692  53.370  1.00  0.00
ATOM   4904  C18 DPP   357      24.710  19.752  54.030  1.00  0.00
ATOM   4905  C19 DPP   357      24.090  20.182  55.360  1.00  0.00
ATOM   4906 C110 DPP   357      24.980  21.022  56.280  1.00  0.00
ATOM   4907 C111 DPP   357      24.520  21.402  57.690  1.00  0.00
ATOM   4908 C112 DPP   357      25.550  22.182  58.510  1.00  0.00
ATOM   4909 C113 DPP   357      26.200  23.382  57.820  1.00  0.00
ATOM   4910 C114 DPP   357      26.960  24.312  58.760  1.00  0.00
ATOM   4911 C115 DPP   357      26.230  25.112  59.840  1.00  0.00
ATOM   4912 C116 DPP   357      27.070  26.092  60.650  1.00  0.00
ATOM   4913  C33 DPP   358      21.260  12.902  43.210  1.00  0.00
ATOM   4914  C34 DPP   358      21.850  15.182  43.650  1.00  0.00
ATOM   4915  C35 DPP   358      20.470  14.662  41.820  1.00  0.00
ATOM   4916  N   DPP   358      20.770  14.292  43.210  1.00  0.00
ATOM   4917  C32 DPP   358      19.610  14.352  44.110  1.00  0.00
ATOM   4918  C31 DPP   358      18.630  15.502  43.950  1.00  0.00
ATOM   4919  O32 DPP   358      19.180  16.812  43.770  1.00  0.00
ATOM   4920  P   DPP   358      18.340  18.012  43.090  1.00  0.00
ATOM   4921  O33 DPP   358      17.210  17.482  42.290  1.00  0.00
ATOM   4922  O34 DPP   358      19.240  18.942  42.370  1.00  0.00
ATOM   4923  O31 DPP   358      17.940  19.022  44.270  1.00  0.00
ATOM   4924  C3  DPP   358      16.800  18.792  45.110  1.00  0.00
ATOM   4925  C2  DPP   358      16.370  19.942  46.010  1.00  0.00
ATOM   4926  O21 DPP   358      15.070  19.512  46.430  1.00  0.00
ATOM   4927  C21 DPP   358      14.390  20.062  47.430  1.00  0.00
ATOM   4928  O22 DPP   358      14.830  21.032  48.050  1.00  0.00
ATOM   4929  C22 DPP   358      13.200  19.302  47.850  1.00  0.00
ATOM   4930  C23 DPP   358      13.090  18.812  49.300  1.00  0.00
ATOM   4931  C24 DPP   358      11.700  18.212  49.510  1.00  0.00
ATOM   4932  C25 DPP   358      11.750  17.372  50.790  1.00  0.00
ATOM   4933  C26 DPP   358      12.030  18.192  52.050  1.00  0.00
ATOM   4934  C27 DPP   358      12.760  17.392  53.130  1.00  0.00
ATOM   4935  C28 DPP   358      13.010  18.242  54.380  1.00  0.00
ATOM   4936  C29 DPP   358      14.110  17.512  55.160  1.00  0.00
ATOM   4937 C210 DPP   358      13.610  17.302  56.590  1.00  0.00
ATOM   4938 C211 DPP   358      14.500  16.392  57.430  1.00  0.00
ATOM   4939 C212 DPP   358      13.940  16.252  58.840  1.00  0.00
ATOM   4940 C213 DPP   358      14.680  15.102  59.520  1.00  0.00
ATOM   4941 C214 DPP   358      14.340  14.792  60.980  1.00  0.00
ATOM   4942 C215 DPP   358      12.860  14.432  61.090  1.00  0.00
ATOM   4943 C216 DPP   358      12.760  13.842  62.500  1.00  0.00
ATOM   4944  C1  DPP   358      16.170  21.252  45.250  1.00  0.00
ATOM   4945  O11 DPP   358      15.970  22.462  45.990  1.00  0.00
ATOM   4946  C11 DPP   358      17.040  23.102  46.460  1.00  0.00
ATOM   4947  O12 DPP   358      18.040  23.182  45.740  1.00  0.00
ATOM   4948  C12 DPP   358      16.570  24.062  47.480  1.00  0.00
ATOM   4949  C13 DPP   358      17.620  24.252  48.580  1.00  0.00
ATOM   4950  C14 DPP   358      17.150  24.942  49.870  1.00  0.00
ATOM   4951  C15 DPP   358      18.080  25.082  51.070  1.00  0.00
ATOM   4952  C16 DPP   358      19.160  26.092  50.670  1.00  0.00
ATOM   4953  C17 DPP   358      20.190  26.272  51.780  1.00  0.00
ATOM   4954  C18 DPP   358      19.790  27.402  52.730  1.00  0.00
ATOM   4955  C19 DPP   358      20.730  27.962  53.810  1.00  0.00
ATOM   4956 C110 DPP   358      19.800  28.622  54.830  1.00  0.00
ATOM   4957 C111 DPP   358      20.510  29.552  55.820  1.00  0.00
ATOM   4958 C112 DPP   358      19.920  30.942  55.570  1.00  0.00
ATOM   4959 C113 DPP   358      20.130  31.972  56.670  1.00  0.00
ATOM   4960 C114 DPP   358      21.590  32.292  56.980  1.00  0.00
ATOM   4961 C115 DPP   358      21.650  32.672  58.460  1.00  0.00
ATOM   4962 C116 DPP   358      21.960  34.172  58.450  1.00  0.00
ATOM   4963  C33 DPP   359       9.050  26.732  42.880  1.00  0.00
ATOM   4964  C34 DPP   359      10.940  26.512  41.250  1.00  0.00
ATOM   4965  C35 DPP   359       9.160  25.072  41.210  1.00  0.00
ATOM   4966  N   DPP   359       9.490  26.482  41.500  1.00  0.00
ATOM   4967  C32 DPP   359       8.730  27.232  40.500  1.00  0.00
ATOM   4968  C31 DPP   359       8.590  28.742  40.660  1.00  0.00
ATOM   4969  O32 DPP   359       7.590  29.042  41.640  1.00  0.00
ATOM   4970  P   DPP   359       7.190  30.582  41.910  1.00  0.00
ATOM   4971  O33 DPP   359       5.810  30.582  42.440  1.00  0.00
ATOM   4972  O34 DPP   359       7.470  31.342  40.670  1.00  0.00
ATOM   4973  O31 DPP   359       8.150  31.322  42.960  1.00  0.00
ATOM   4974  C3  DPP   359       8.040  31.502  44.370  1.00  0.00
ATOM   4975  C2  DPP   359       8.340  30.312  45.290  1.00  0.00
ATOM   4976  O21 DPP   359       9.490  29.672  44.740  1.00  0.00
ATOM   4977  C21 DPP   359      10.750  29.942  45.070  1.00  0.00
ATOM   4978  O22 DPP   359      11.000  30.922  45.780  1.00  0.00
ATOM   4979  C22 DPP   359      11.660  28.982  44.410  1.00  0.00
ATOM   4980  C23 DPP   359      12.370  28.012  45.360  1.00  0.00
ATOM   4981  C24 DPP   359      11.540  26.922  46.040  1.00  0.00
ATOM   4982  C25 DPP   359      12.470  25.982  46.800  1.00  0.00
ATOM   4983  C26 DPP   359      11.980  24.692  47.450  1.00  0.00
ATOM   4984  C27 DPP   359      12.900  24.442  48.650  1.00  0.00
ATOM   4985  C28 DPP   359      12.460  23.172  49.380  1.00  0.00
ATOM   4986  C29 DPP   359      13.200  23.192  50.720  1.00  0.00
ATOM   4987 C210 DPP   359      12.940  21.922  51.530  1.00  0.00
ATOM   4988 C211 DPP   359      13.840  22.082  52.750  1.00  0.00
ATOM   4989 C212 DPP   359      15.280  22.562  52.510  1.00  0.00
ATOM   4990 C213 DPP   359      15.960  22.832  53.850  1.00  0.00
ATOM   4991 C214 DPP   359      15.290  23.942  54.650  1.00  0.00
ATOM   4992 C215 DPP   359      15.960  24.542  55.890  1.00  0.00
ATOM   4993 C216 DPP   359      16.890  25.712  55.580  1.00  0.00
ATOM   4994  C1  DPP   359       7.090  29.432  45.140  1.00  0.00
ATOM   4995  O11 DPP   359       7.310  28.182  45.790  1.00  0.00
ATOM   4996  C11 DPP   359       6.450  27.172  45.660  1.00  0.00
ATOM   4997  O12 DPP   359       5.580  27.142  44.790  1.00  0.00
ATOM   4998  C12 DPP   359       6.900  26.102  46.590  1.00  0.00
ATOM   4999  C13 DPP   359       7.190  26.352  48.070  1.00  0.00
ATOM   5000  C14 DPP   359       7.610  25.052  48.750  1.00  0.00
ATOM   5001  C15 DPP   359       7.730  25.362  50.240  1.00  0.00
ATOM   5002  C16 DPP   359       6.440  25.762  50.960  1.00  0.00
ATOM   5003  C17 DPP   359       6.660  25.642  52.470  1.00  0.00
ATOM   5004  C18 DPP   359       5.370  25.792  53.280  1.00  0.00
ATOM   5005  C19 DPP   359       5.600  25.882  54.790  1.00  0.00
ATOM   5006 C110 DPP   359       6.100  27.252  55.250  1.00  0.00
ATOM   5007 C111 DPP   359       6.340  27.202  56.760  1.00  0.00
ATOM   5008 C112 DPP   359       6.610  28.612  57.270  1.00  0.00
ATOM   5009 C113 DPP   359       6.900  28.572  58.770  1.00  0.00
ATOM   5010 C114 DPP   359       8.260  27.992  59.180  1.00  0.00
ATOM   5011 C115 DPP   359       8.480  27.542  60.630  1.00  0.00
ATOM   5012 C116 DPP   359       9.970  27.192  60.570  1.00  0.00
ATOM   5013  C33 DPP   360      36.380  63.340  79.230  1.00  0.00
ATOM   5014  C34 DPP   360      34.440  64.480  80.000  1.00  0.00
ATOM   5015  C35 DPP   360      35.330  64.930  77.860  1.00  0.00
ATOM   5016  N   DPP   360      35.070  63.860  78.830  1.00  0.00
ATOM   5017  C32 DPP   360      34.180  62.820  78.270  1.00  0.00
ATOM   5018  C31 DPP   360      34.470  62.030  76.990  1.00  0.00
ATOM   5019  O32 DPP   360      34.840  62.820  75.860  1.00  0.00
ATOM   5020  P   DPP   360      35.160  62.280  74.380  1.00  0.00
ATOM   5021  O33 DPP   360      35.200  63.530  73.580  1.00  0.00
ATOM   5022  O34 DPP   360      34.070  61.320  74.130  1.00  0.00
ATOM   5023  O31 DPP   360      36.570  61.500  74.390  1.00  0.00
ATOM   5024  C3  DPP   360      37.770  62.110  74.880  1.00  0.00
ATOM   5025  C2  DPP   360      39.050  61.330  74.570  1.00  0.00
ATOM   5026  O21 DPP   360      40.080  61.980  75.330  1.00  0.00
ATOM   5027  C21 DPP   360      40.470  61.370  76.440  1.00  0.00
ATOM   5028  O22 DPP   360      40.110  60.310  76.960  1.00  0.00
ATOM   5029  C22 DPP   360      41.680  62.080  76.900  1.00  0.00
ATOM   5030  C23 DPP   360      42.920  61.340  76.390  1.00  0.00
ATOM   5031  C24 DPP   360      44.140  61.940  77.100  1.00  0.00
ATOM   5032  C25 DPP   360      45.340  61.110  76.660  1.00  0.00
ATOM   5033  C26 DPP   360      45.650  61.140  75.160  1.00  0.00
ATOM   5034  C27 DPP   360      46.860  60.290  74.730  1.00  0.00
ATOM   5035  C28 DPP   360      47.150  60.600  73.260  1.00  0.00
ATOM   5036  C29 DPP   360      47.940  59.550  72.480  1.00  0.00
ATOM   5037 C210 DPP   360      47.080  58.300  72.330  1.00  0.00
ATOM   5038 C211 DPP   360      47.710  57.410  71.250  1.00  0.00
ATOM   5039 C212 DPP   360      47.000  56.070  71.130  1.00  0.00
ATOM   5040 C213 DPP   360      45.470  56.210  71.080  1.00  0.00
ATOM   5041 C214 DPP   360      44.750  54.960  70.560  1.00  0.00
ATOM   5042 C215 DPP   360      43.240  55.190  70.540  1.00  0.00
ATOM   5043 C216 DPP   360      42.480  53.880  70.390  1.00  0.00
ATOM   5044  C1  DPP   360      39.410  61.310  73.090  1.00  0.00
ATOM   5045  O11 DPP   360      40.690  60.700  72.840  1.00  0.00
ATOM   5046  C11 DPP   360      41.240  60.970  71.660  1.00  0.00
ATOM   5047  O12 DPP   360      40.860  61.920  70.980  1.00  0.00
ATOM   5048  C12 DPP   360      42.640  60.500  71.560  1.00  0.00
ATOM   5049  C13 DPP   360      42.820  59.950  70.150  1.00  0.00
ATOM   5050  C14 DPP   360      44.300  59.980  69.780  1.00  0.00
ATOM   5051  C15 DPP   360      44.470  59.320  68.410  1.00  0.00
ATOM   5052  C16 DPP   360      45.930  59.390  67.960  1.00  0.00
ATOM   5053  C17 DPP   360      46.110  58.700  66.600  1.00  0.00
ATOM   5054  C18 DPP   360      47.520  58.100  66.540  1.00  0.00
ATOM   5055  C19 DPP   360      47.620  57.220  65.290  1.00  0.00
ATOM   5056 C110 DPP   360      48.870  56.350  65.150  1.00  0.00
ATOM   5057 C111 DPP   360      48.790  55.520  63.870  1.00  0.00
ATOM   5058 C112 DPP   360      48.740  56.410  62.630  1.00  0.00
ATOM   5059 C113 DPP   360      50.040  57.190  62.380  1.00  0.00
ATOM   5060 C114 DPP   360      49.690  58.360  61.450  1.00  0.00
ATOM   5061 C115 DPP   360      48.700  59.360  62.060  1.00  0.00
ATOM   5062 C116 DPP   360      49.240  60.420  63.020  1.00  0.00
ATOM   5063  C33 DPP   361      12.820  24.352  88.150  1.00  0.00
ATOM   5064  C34 DPP   361      14.270  23.902  86.320  1.00  0.00
ATOM   5065  C35 DPP   361      12.070  24.822  85.970  1.00  0.00
ATOM   5066  N   DPP   361      13.260  24.842  86.830  1.00  0.00
ATOM   5067  C32 DPP   361      13.720  26.232  86.930  1.00  0.00
ATOM   5068  C31 DPP   361      14.830  26.712  87.860  1.00  0.00
ATOM   5069  O32 DPP   361      16.130  26.122  87.740  1.00  0.00
ATOM   5070  P   DPP   361      17.370  27.142  87.920  1.00  0.00
ATOM   5071  O33 DPP   361      18.150  26.732  89.110  1.00  0.00
ATOM   5072  O34 DPP   361      17.040  28.572  87.710  1.00  0.00
ATOM   5073  O31 DPP   361      18.200  26.752  86.600  1.00  0.00
ATOM   5074  C3  DPP   361      18.170  27.422  85.330  1.00  0.00
ATOM   5075  C2  DPP   361      18.770  26.512  84.260  1.00  0.00
ATOM   5076  O21 DPP   361      18.750  27.182  83.000  1.00  0.00
ATOM   5077  C21 DPP   361      19.720  27.072  82.100  1.00  0.00
ATOM   5078  O22 DPP   361      20.830  26.622  82.380  1.00  0.00
ATOM   5079  C22 DPP   361      19.330  27.682  80.800  1.00  0.00
ATOM   5080  C23 DPP   361      19.860  26.722  79.730  1.00  0.00
ATOM   5081  C24 DPP   361      19.470  27.122  78.310  1.00  0.00
ATOM   5082  C25 DPP   361      19.980  26.082  77.310  1.00  0.00
ATOM   5083  C26 DPP   361      19.430  26.412  75.920  1.00  0.00
ATOM   5084  C27 DPP   361      20.180  25.722  74.780  1.00  0.00
ATOM   5085  C28 DPP   361      19.660  26.212  73.430  1.00  0.00
ATOM   5086  C29 DPP   361      20.530  25.762  72.250  1.00  0.00
ATOM   5087 C210 DPP   361      19.790  25.952  70.930  1.00  0.00
ATOM   5088 C211 DPP   361      20.810  25.872  69.790  1.00  0.00
ATOM   5089 C212 DPP   361      20.410  26.542  68.470  1.00  0.00
ATOM   5090 C213 DPP   361      21.620  26.382  67.550  1.00  0.00
ATOM   5091 C214 DPP   361      21.510  27.032  66.170  1.00  0.00
ATOM   5092 C215 DPP   361      20.590  26.182  65.290  1.00  0.00
ATOM   5093 C216 DPP   361      19.960  26.772  64.030  1.00  0.00
ATOM   5094  C1  DPP   361      17.990  25.202  84.180  1.00  0.00
ATOM   5095  O11 DPP   361      18.530  24.232  83.270  1.00  0.00
ATOM   5096  C11 DPP   361      17.660  23.282  82.920  1.00  0.00
ATOM   5097  O12 DPP   361      16.520  23.282  83.400  1.00  0.00
ATOM   5098  C12 DPP   361      18.240  22.142  82.190  1.00  0.00
ATOM   5099  C13 DPP   361      18.470  22.642  80.760  1.00  0.00
ATOM   5100  C14 DPP   361      18.790  21.612  79.680  1.00  0.00
ATOM   5101  C15 DPP   361      18.430  22.112  78.290  1.00  0.00
ATOM   5102  C16 DPP   361      18.900  21.192  77.160  1.00  0.00
ATOM   5103  C17 DPP   361      18.710  21.882  75.810  1.00  0.00
ATOM   5104  C18 DPP   361      18.980  20.862  74.700  1.00  0.00
ATOM   5105  C19 DPP   361      19.820  21.432  73.560  1.00  0.00
ATOM   5106 C110 DPP   361      19.680  20.702  72.220  1.00  0.00
ATOM   5107 C111 DPP   361      20.240  21.572  71.090  1.00  0.00
ATOM   5108 C112 DPP   361      20.070  20.932  69.710  1.00  0.00
ATOM   5109 C113 DPP   361      20.660  21.702  68.530  1.00  0.00
ATOM   5110 C114 DPP   361      20.930  21.032  67.180  1.00  0.00
ATOM   5111 C115 DPP   361      21.380  22.072  66.150  1.00  0.00
ATOM   5112 C116 DPP   361      20.770  21.602  64.820  1.00  0.00
ATOM   5113  C33 DPP   362      18.100  45.620  83.200  1.00  0.00
ATOM   5114  C34 DPP   362      18.910  43.840  81.950  1.00  0.00
ATOM   5115  C35 DPP   362      20.300  45.670  82.300  1.00  0.00
ATOM   5116  N   DPP   362      19.310  44.820  82.980  1.00  0.00
ATOM   5117  C32 DPP   362      19.890  44.340  84.240  1.00  0.00
ATOM   5118  C31 DPP   362      18.980  43.460  85.100  1.00  0.00
ATOM   5119  O32 DPP   362      18.550  42.230  84.520  1.00  0.00
ATOM   5120  P   DPP   362      17.820  41.010  85.270  1.00  0.00
ATOM   5121  O33 DPP   362      17.130  41.570  86.460  1.00  0.00
ATOM   5122  O34 DPP   362      18.700  39.840  85.480  1.00  0.00
ATOM   5123  O31 DPP   362      16.800  40.530  84.120  1.00  0.00
ATOM   5124  C3  DPP   362      15.630  41.330  83.970  1.00  0.00
ATOM   5125  C2  DPP   362      14.720  40.930  82.800  1.00  0.00
ATOM   5126  O21 DPP   362      15.350  41.270  81.570  1.00  0.00
ATOM   5127  C21 DPP   362      16.080  40.370  80.910  1.00  0.00
ATOM   5128  O22 DPP   362      16.000  39.150  81.100  1.00  0.00
ATOM   5129  C22 DPP   362      16.660  41.000  79.710  1.00  0.00
ATOM   5130  C23 DPP   362      17.000  40.120  78.500  1.00  0.00
ATOM   5131  C24 DPP   362      17.000  40.710  77.090  1.00  0.00
ATOM   5132  C25 DPP   362      15.630  40.300  76.540  1.00  0.00
ATOM   5133  C26 DPP   362      15.340  40.790  75.130  1.00  0.00
ATOM   5134  C27 DPP   362      16.080  40.020  74.030  1.00  0.00
ATOM   5135  C28 DPP   362      16.110  40.720  72.670  1.00  0.00
ATOM   5136  C29 DPP   362      16.930  39.970  71.620  1.00  0.00
ATOM   5137 C210 DPP   362      16.920  41.050  70.530  1.00  0.00
ATOM   5138 C211 DPP   362      17.780  40.550  69.370  1.00  0.00
ATOM   5139 C212 DPP   362      17.190  39.310  68.700  1.00  0.00
ATOM   5140 C213 DPP   362      17.960  39.070  67.400  1.00  0.00
ATOM   5141 C214 DPP   362      17.210  37.910  66.750  1.00  0.00
ATOM   5142 C215 DPP   362      17.900  37.470  65.450  1.00  0.00
ATOM   5143 C216 DPP   362      17.180  36.420  64.590  1.00  0.00
ATOM   5144  C1  DPP   362      13.340  41.560  82.950  1.00  0.00
ATOM   5145  O11 DPP   362      12.420  41.320  81.880  1.00  0.00
ATOM   5146  C11 DPP   362      11.160  41.750  81.920  1.00  0.00
ATOM   5147  O12 DPP   362      10.700  42.530  82.750  1.00  0.00
ATOM   5148  C12 DPP   362      10.620  41.520  80.550  1.00  0.00
ATOM   5149  C13 DPP   362       9.140  41.850  80.390  1.00  0.00
ATOM   5150  C14 DPP   362       8.600  41.800  78.960  1.00  0.00
ATOM   5151  C15 DPP   362       7.860  43.110  78.700  1.00  0.00
ATOM   5152  C16 DPP   362       7.210  43.080  77.310  1.00  0.00
ATOM   5153  C17 DPP   362       8.210  43.010  76.160  1.00  0.00
ATOM   5154  C18 DPP   362       7.400  42.640  74.920  1.00  0.00
ATOM   5155  C19 DPP   362       8.340  42.330  73.750  1.00  0.00
ATOM   5156 C110 DPP   362       7.460  41.850  72.590  1.00  0.00
ATOM   5157 C111 DPP   362       8.170  41.040  71.500  1.00  0.00
ATOM   5158 C112 DPP   362       9.430  41.700  70.940  1.00  0.00
ATOM   5159 C113 DPP   362       9.260  42.940  70.050  1.00  0.00
ATOM   5160 C114 DPP   362       9.160  42.470  68.600  1.00  0.00
ATOM   5161 C115 DPP   362       9.570  43.690  67.770  1.00  0.00
ATOM   5162 C116 DPP   362       9.470  43.390  66.270  1.00  0.00
ATOM   5163  C33 DPP   363      15.460  49.520  85.170  1.00  0.00
ATOM   5164  C34 DPP   363      16.320  50.950  86.750  1.00  0.00
ATOM   5165  C35 DPP   363      14.640  49.510  87.420  1.00  0.00
ATOM   5166  N   DPP   363      15.850  49.560  86.590  1.00  0.00
ATOM   5167  C32 DPP   363      16.930  48.640  86.980  1.00  0.00
ATOM   5168  C31 DPP   363      18.010  48.310  85.940  1.00  0.00
ATOM   5169  O32 DPP   363      18.650  49.480  85.420  1.00  0.00
ATOM   5170  P   DPP   363      20.000  49.130  84.620  1.00  0.00
ATOM   5171  O33 DPP   363      20.750  47.940  85.080  1.00  0.00
ATOM   5172  O34 DPP   363      20.860  50.330  84.500  1.00  0.00
ATOM   5173  O31 DPP   363      19.350  48.800  83.180  1.00  0.00
ATOM   5174  C3  DPP   363      18.810  49.790  82.290  1.00  0.00
ATOM   5175  C2  DPP   363      18.410  49.200  80.940  1.00  0.00
ATOM   5176  O21 DPP   363      18.510  50.290  80.020  1.00  0.00
ATOM   5177  C21 DPP   363      18.710  49.910  78.760  1.00  0.00
ATOM   5178  O22 DPP   363      19.110  48.820  78.360  1.00  0.00
ATOM   5179  C22 DPP   363      18.650  51.080  77.860  1.00  0.00
ATOM   5180  C23 DPP   363      19.780  52.100  78.040  1.00  0.00
ATOM   5181  C24 DPP   363      21.170  51.490  78.220  1.00  0.00
ATOM   5182  C25 DPP   363      22.220  52.540  78.620  1.00  0.00
ATOM   5183  C26 DPP   363      22.560  53.640  77.610  1.00  0.00
ATOM   5184  C27 DPP   363      23.850  54.350  78.040  1.00  0.00
ATOM   5185  C28 DPP   363      24.390  55.200  76.890  1.00  0.00
ATOM   5186  C29 DPP   363      24.700  54.340  75.670  1.00  0.00
ATOM   5187 C210 DPP   363      25.390  55.140  74.570  1.00  0.00
ATOM   5188 C211 DPP   363      24.580  56.350  74.090  1.00  0.00
ATOM   5189 C212 DPP   363      25.400  57.230  73.150  1.00  0.00
ATOM   5190 C213 DPP   363      26.550  58.040  73.760  1.00  0.00
ATOM   5191 C214 DPP   363      27.070  59.050  72.730  1.00  0.00
ATOM   5192 C215 DPP   363      28.280  59.670  73.440  1.00  0.00
ATOM   5193 C216 DPP   363      29.120  60.670  72.650  1.00  0.00
ATOM   5194  C1  DPP   363      16.990  48.630  80.880  1.00  0.00
ATOM   5195  O11 DPP   363      16.610  48.180  79.580  1.00  0.00
ATOM   5196  C11 DPP   363      16.990  46.990  79.130  1.00  0.00
ATOM   5197  O12 DPP   363      17.180  46.060  79.910  1.00  0.00
ATOM   5198  C12 DPP   363      16.770  46.880  77.670  1.00  0.00
ATOM   5199  C13 DPP   363      17.680  45.730  77.220  1.00  0.00
ATOM   5200  C14 DPP   363      17.300  45.220  75.830  1.00  0.00
ATOM   5201  C15 DPP   363      17.480  46.260  74.720  1.00  0.00
ATOM   5202  C16 DPP   363      17.410  45.530  73.380  1.00  0.00
ATOM   5203  C17 DPP   363      17.780  46.340  72.140  1.00  0.00
ATOM   5204  C18 DPP   363      17.570  45.520  70.870  1.00  0.00
ATOM   5205  C19 DPP   363      17.900  46.430  69.690  1.00  0.00
ATOM   5206 C110 DPP   363      17.500  45.760  68.370  1.00  0.00
ATOM   5207 C111 DPP   363      18.120  46.580  67.240  1.00  0.00
ATOM   5208 C112 DPP   363      17.880  46.110  65.810  1.00  0.00
ATOM   5209 C113 DPP   363      19.080  45.170  65.630  1.00  0.00
ATOM   5210 C114 DPP   363      18.790  44.000  64.690  1.00  0.00
ATOM   5211 C115 DPP   363      20.000  43.070  64.680  1.00  0.00
ATOM   5212 C116 DPP   363      19.600  41.760  63.990  1.00  0.00
ATOM   5213  C33 DPP   364      17.160  37.742  87.500  1.00  0.00
ATOM   5214  C34 DPP   364      15.560  39.342  88.000  1.00  0.00
ATOM   5215  C35 DPP   364      15.280  38.262  85.960  1.00  0.00
ATOM   5216  N   DPP   364      15.730  38.042  87.340  1.00  0.00
ATOM   5217  C32 DPP   364      14.890  37.042  88.000  1.00  0.00
ATOM   5218  C31 DPP   364      14.730  35.722  87.250  1.00  0.00
ATOM   5219  O32 DPP   364      15.880  34.892  87.380  1.00  0.00
ATOM   5220  P   DPP   364      15.660  33.472  88.110  1.00  0.00
ATOM   5221  O33 DPP   364      14.710  33.472  89.240  1.00  0.00
ATOM   5222  O34 DPP   364      16.950  32.792  88.350  1.00  0.00
ATOM   5223  O31 DPP   364      14.940  32.592  86.970  1.00  0.00
ATOM   5224  C3  DPP   364      15.670  31.952  85.920  1.00  0.00
ATOM   5225  C2  DPP   364      14.740  31.262  84.910  1.00  0.00
ATOM   5226  O21 DPP   364      15.390  30.402  83.970  1.00  0.00
ATOM   5227  C21 DPP   364      14.720  29.332  83.560  1.00  0.00
ATOM   5228  O22 DPP   364      13.560  29.122  83.910  1.00  0.00
ATOM   5229  C22 DPP   364      15.440  28.462  82.610  1.00  0.00
ATOM   5230  C23 DPP   364      14.810  27.112  82.250  1.00  0.00
ATOM   5231  C24 DPP   364      15.540  26.342  81.160  1.00  0.00
ATOM   5232  C25 DPP   364      14.480  25.542  80.400  1.00  0.00
ATOM   5233  C26 DPP   364      14.970  24.932  79.090  1.00  0.00
ATOM   5234  C27 DPP   364      15.320  25.922  77.960  1.00  0.00
ATOM   5235  C28 DPP   364      15.750  25.132  76.720  1.00  0.00
ATOM   5236  C29 DPP   364      15.380  25.672  75.340  1.00  0.00
ATOM   5237 C210 DPP   364      15.700  24.632  74.270  1.00  0.00
ATOM   5238 C211 DPP   364      15.460  25.112  72.840  1.00  0.00
ATOM   5239 C212 DPP   364      16.130  24.142  71.870  1.00  0.00
ATOM   5240 C213 DPP   364      16.060  24.592  70.410  1.00  0.00
ATOM   5241 C214 DPP   364      16.720  23.692  69.360  1.00  0.00
ATOM   5242 C215 DPP   364      16.460  24.472  68.070  1.00  0.00
ATOM   5243 C216 DPP   364      17.570  24.052  67.110  1.00  0.00
ATOM   5244  C1  DPP   364      14.100  32.392  84.100  1.00  0.00
ATOM   5245  O11 DPP   364      13.040  32.042  83.210  1.00  0.00
ATOM   5246  C11 DPP   364      11.840  32.442  83.620  1.00  0.00
ATOM   5247  O12 DPP   364      11.570  33.022  84.670  1.00  0.00
ATOM   5248  C12 DPP   364      10.730  32.212  82.670  1.00  0.00
ATOM   5249  C13 DPP   364      10.900  33.092  81.430  1.00  0.00
ATOM   5250  C14 DPP   364      11.830  32.522  80.350  1.00  0.00
ATOM   5251  C15 DPP   364      11.810  33.292  79.020  1.00  0.00
ATOM   5252  C16 DPP   364      12.700  32.732  77.910  1.00  0.00
ATOM   5253  C17 DPP   364      12.220  33.392  76.610  1.00  0.00
ATOM   5254  C18 DPP   364      12.180  32.442  75.410  1.00  0.00
ATOM   5255  C19 DPP   364      11.610  33.182  74.190  1.00  0.00
ATOM   5256 C110 DPP   364      11.760  32.492  72.840  1.00  0.00
ATOM   5257 C111 DPP   364      10.850  33.112  71.770  1.00  0.00
ATOM   5258 C112 DPP   364      10.670  32.182  70.570  1.00  0.00
ATOM   5259 C113 DPP   364      11.070  32.942  69.310  1.00  0.00
ATOM   5260 C114 DPP   364      12.600  32.982  69.240  1.00  0.00
ATOM   5261 C115 DPP   364      13.130  33.302  67.840  1.00  0.00
ATOM   5262 C116 DPP   364      12.830  32.122  66.920  1.00  0.00
ATOM   5263  C33 DPP   365       6.120  25.102  90.240  1.00  0.00
ATOM   5264  C34 DPP   365       7.140  26.492  88.640  1.00  0.00
ATOM   5265  C35 DPP   365       8.480  25.242  90.220  1.00  0.00
ATOM   5266  N   DPP   365       7.290  25.212  89.360  1.00  0.00
ATOM   5267  C32 DPP   365       7.290  24.052  88.460  1.00  0.00
ATOM   5268  C31 DPP   365       8.200  23.832  87.250  1.00  0.00
ATOM   5269  O32 DPP   365       9.540  23.412  87.560  1.00  0.00
ATOM   5270  P   DPP   365       9.880  21.882  87.920  1.00  0.00
ATOM   5271  O33 DPP   365       8.700  21.102  87.490  1.00  0.00
ATOM   5272  O34 DPP   365      10.220  21.742  89.350  1.00  0.00
ATOM   5273  O31 DPP   365      11.130  21.702  86.930  1.00  0.00
ATOM   5274  C3  DPP   365      11.450  20.572  86.110  1.00  0.00
ATOM   5275  C2  DPP   365      10.690  20.492  84.790  1.00  0.00
ATOM   5276  O21 DPP   365      11.210  19.352  84.090  1.00  0.00
ATOM   5277  C21 DPP   365      10.770  18.102  84.200  1.00  0.00
ATOM   5278  O22 DPP   365       9.660  17.862  84.690  1.00  0.00
ATOM   5279  C22 DPP   365      11.690  17.242  83.420  1.00  0.00
ATOM   5280  C23 DPP   365      11.300  17.002  81.960  1.00  0.00
ATOM   5281  C24 DPP   365      12.260  16.202  81.080  1.00  0.00
ATOM   5282  C25 DPP   365      11.840  16.342  79.610  1.00  0.00
ATOM   5283  C26 DPP   365      12.740  15.582  78.630  1.00  0.00
ATOM   5284  C27 DPP   365      12.410  15.882  77.160  1.00  0.00
ATOM   5285  C28 DPP   365      13.620  15.502  76.310  1.00  0.00
ATOM   5286  C29 DPP   365      13.180  15.162  74.880  1.00  0.00
ATOM   5287 C210 DPP   365      14.330  15.082  73.880  1.00  0.00
ATOM   5288 C211 DPP   365      13.750  14.952  72.470  1.00  0.00
ATOM   5289 C212 DPP   365      14.880  14.762  71.460  1.00  0.00
ATOM   5290 C213 DPP   365      14.480  14.682  69.980  1.00  0.00
ATOM   5291 C214 DPP   365      15.650  14.452  69.020  1.00  0.00
ATOM   5292 C215 DPP   365      15.110  13.982  67.670  1.00  0.00
ATOM   5293 C216 DPP   365      16.270  13.742  66.700  1.00  0.00
ATOM   5294  C1  DPP   365      11.100  21.742  84.000  1.00  0.00
ATOM   5295  O11 DPP   365      10.290  22.122  82.890  1.00  0.00
ATOM   5296  C11 DPP   365      10.680  23.212  82.230  1.00  0.00
ATOM   5297  O12 DPP   365      11.680  23.882  82.470  1.00  0.00
ATOM   5298  C12 DPP   365       9.670  23.762  81.290  1.00  0.00
ATOM   5299  C13 DPP   365      10.030  24.042  79.820  1.00  0.00
ATOM   5300  C14 DPP   365      10.300  22.832  78.920  1.00  0.00
ATOM   5301  C15 DPP   365      10.850  23.382  77.600  1.00  0.00
ATOM   5302  C16 DPP   365       9.740  23.612  76.570  1.00  0.00
ATOM   5303  C17 DPP   365      10.260  24.192  75.250  1.00  0.00
ATOM   5304  C18 DPP   365      11.270  23.272  74.560  1.00  0.00
ATOM   5305  C19 DPP   365      11.790  23.892  73.270  1.00  0.00
ATOM   5306 C110 DPP   365      11.680  23.002  72.030  1.00  0.00
ATOM   5307 C111 DPP   365      11.870  23.822  70.750  1.00  0.00
ATOM   5308 C112 DPP   365      11.940  23.002  69.460  1.00  0.00
ATOM   5309 C113 DPP   365      12.100  23.922  68.250  1.00  0.00
ATOM   5310 C114 DPP   365      12.050  23.222  66.890  1.00  0.00
ATOM   5311 C115 DPP   365      12.980  22.012  66.750  1.00  0.00
ATOM   5312 C116 DPP   365      12.930  21.252  65.420  1.00  0.00
ATOM   5313  C33 DPP   366      11.840  42.610  88.340  1.00  0.00
ATOM   5314  C34 DPP   366      12.720  44.760  88.090  1.00  0.00
ATOM   5315  C35 DPP   366      13.940  42.890  87.260  1.00  0.00
ATOM   5316  N   DPP   366      12.600  43.460  87.410  1.00  0.00
ATOM   5317  C32 DPP   366      11.960  43.430  86.080  1.00  0.00
ATOM   5318  C31 DPP   366      12.000  44.630  85.130  1.00  0.00
ATOM   5319  O32 DPP   366      13.390  44.860  84.940  1.00  0.00
ATOM   5320  P   DPP   366      13.850  46.290  84.340  1.00  0.00
ATOM   5321  O33 DPP   366      15.310  46.100  84.410  1.00  0.00
ATOM   5322  O34 DPP   366      13.330  47.380  85.200  1.00  0.00
ATOM   5323  O31 DPP   366      13.160  46.410  82.890  1.00  0.00
ATOM   5324  C3  DPP   366      13.750  45.810  81.730  1.00  0.00
ATOM   5325  C2  DPP   366      12.970  46.130  80.450  1.00  0.00
ATOM   5326  O21 DPP   366      13.390  45.200  79.450  1.00  0.00
ATOM   5327  C21 DPP   366      12.450  44.720  78.630  1.00  0.00
ATOM   5328  O22 DPP   366      11.230  44.820  78.730  1.00  0.00
ATOM   5329  C22 DPP   366      13.010  43.950  77.500  1.00  0.00
ATOM   5330  C23 DPP   366      12.920  44.770  76.210  1.00  0.00
ATOM   5331  C24 DPP   366      13.440  44.060  74.950  1.00  0.00
ATOM   5332  C25 DPP   366      13.130  44.810  73.660  1.00  0.00
ATOM   5333  C26 DPP   366      13.420  44.120  72.330  1.00  0.00
ATOM   5334  C27 DPP   366      12.890  45.070  71.260  1.00  0.00
ATOM   5335  C28 DPP   366      13.560  44.740  69.930  1.00  0.00
ATOM   5336  C29 DPP   366      13.120  45.550  68.710  1.00  0.00
ATOM   5337 C210 DPP   366      13.920  45.190  67.450  1.00  0.00
ATOM   5338 C211 DPP   366      13.250  45.780  66.210  1.00  0.00
ATOM   5339 C212 DPP   366      13.670  45.080  64.910  1.00  0.00
ATOM   5340 C213 DPP   366      13.050  45.630  63.620  1.00  0.00
ATOM   5341 C214 DPP   366      13.800  46.840  63.090  1.00  0.00
ATOM   5342 C215 DPP   366      13.150  47.370  61.810  1.00  0.00
ATOM   5343 C216 DPP   366      13.080  46.420  60.620  1.00  0.00
ATOM   5344  C1  DPP   366      13.420  47.510  79.980  1.00  0.00
ATOM   5345  O11 DPP   366      13.020  47.870  78.650  1.00  0.00
ATOM   5346  C11 DPP   366      13.290  49.090  78.180  1.00  0.00
ATOM   5347  O12 DPP   366      13.650  50.030  78.870  1.00  0.00
ATOM   5348  C12 DPP   366      12.910  49.180  76.750  1.00  0.00
ATOM   5349  C13 DPP   366      14.100  49.560  75.860  1.00  0.00
ATOM   5350  C14 DPP   366      13.570  49.520  74.430  1.00  0.00
ATOM   5351  C15 DPP   366      14.700  49.650  73.400  1.00  0.00
ATOM   5352  C16 DPP   366      14.040  49.690  72.020  1.00  0.00
ATOM   5353  C17 DPP   366      15.090  49.700  70.910  1.00  0.00
ATOM   5354  C18 DPP   366      14.270  49.270  69.700  1.00  0.00
ATOM   5355  C19 DPP   366      14.070  50.550  68.900  1.00  0.00
ATOM   5356 C110 DPP   366      13.760  50.210  67.440  1.00  0.00
ATOM   5357 C111 DPP   366      14.720  49.470  66.510  1.00  0.00
ATOM   5358 C112 DPP   366      15.820  50.350  65.920  1.00  0.00
ATOM   5359 C113 DPP   366      16.820  49.510  65.110  1.00  0.00
ATOM   5360 C114 DPP   366      17.860  50.420  64.460  1.00  0.00
ATOM   5361 C115 DPP   366      19.180  49.700  64.200  1.00  0.00
ATOM   5362 C116 DPP   366      19.870  49.490  65.550  1.00  0.00
ATOM   5363  C33 DPP   367      21.520  38.812  84.350  1.00  0.00
ATOM   5364  C34 DPP   367      21.870  37.152  82.640  1.00  0.00
ATOM   5365  C35 DPP   367      19.920  37.022  83.910  1.00  0.00
ATOM   5366  N   DPP   367      20.870  37.982  83.330  1.00  0.00
ATOM   5367  C32 DPP   367      20.010  38.712  82.390  1.00  0.00
ATOM   5368  C31 DPP   367      20.760  39.642  81.440  1.00  0.00
ATOM   5369  O32 DPP   367      21.050  40.912  82.030  1.00  0.00
ATOM   5370  P   DPP   367      22.110  41.952  81.420  1.00  0.00
ATOM   5371  O33 DPP   367      23.360  41.302  80.990  1.00  0.00
ATOM   5372  O34 DPP   367      22.350  43.102  82.320  1.00  0.00
ATOM   5373  O31 DPP   367      21.380  42.492  80.100  1.00  0.00
ATOM   5374  C3  DPP   367      21.720  41.962  78.810  1.00  0.00
ATOM   5375  C2  DPP   367      21.640  42.962  77.670  1.00  0.00
ATOM   5376  O21 DPP   367      22.410  42.512  76.540  1.00  0.00
ATOM   5377  C21 DPP   367      21.800  41.932  75.510  1.00  0.00
ATOM   5378  O22 DPP   367      20.610  41.682  75.350  1.00  0.00
ATOM   5379  C22 DPP   367      22.830  41.562  74.510  1.00  0.00
ATOM   5380  C23 DPP   367      22.510  40.422  73.550  1.00  0.00
ATOM   5381  C24 DPP   367      23.610  40.062  72.540  1.00  0.00
ATOM   5382  C25 DPP   367      23.230  39.172  71.360  1.00  0.00
ATOM   5383  C26 DPP   367      22.560  39.972  70.250  1.00  0.00
ATOM   5384  C27 DPP   367      22.630  39.102  68.990  1.00  0.00
ATOM   5385  C28 DPP   367      22.260  39.932  67.750  1.00  0.00
ATOM   5386  C29 DPP   367      22.740  39.322  66.430  1.00  0.00
ATOM   5387 C210 DPP   367      21.800  38.182  66.050  1.00  0.00
ATOM   5388 C211 DPP   367      22.410  37.102  65.150  1.00  0.00
ATOM   5389 C212 DPP   367      21.680  35.782  65.400  1.00  0.00
ATOM   5390 C213 DPP   367      22.180  34.542  64.670  1.00  0.00
ATOM   5391 C214 DPP   367      21.760  34.362  63.210  1.00  0.00
ATOM   5392 C215 DPP   367      22.230  32.982  62.720  1.00  0.00
ATOM   5393 C216 DPP   367      23.730  32.832  62.420  1.00  0.00
ATOM   5394  C1  DPP   367      22.010  44.402  78.050  1.00  0.00
ATOM   5395  O11 DPP   367      21.970  45.352  76.990  1.00  0.00
ATOM   5396  C11 DPP   367      22.290  46.602  77.280  1.00  0.00
ATOM   5397  O12 DPP   367      22.870  46.982  78.290  1.00  0.00
ATOM   5398  C12 DPP   367      22.030  47.582  76.200  1.00  0.00
ATOM   5399  C13 DPP   367      23.180  48.572  75.980  1.00  0.00
ATOM   5400  C14 DPP   367      24.370  48.022  75.190  1.00  0.00
ATOM   5401  C15 DPP   367      24.030  48.032  73.700  1.00  0.00
ATOM   5402  C16 DPP   367      23.710  49.422  73.160  1.00  0.00
ATOM   5403  C17 DPP   367      23.270  49.312  71.700  1.00  0.00
ATOM   5404  C18 DPP   367      23.230  50.612  70.900  1.00  0.00
ATOM   5405  C19 DPP   367      24.600  51.252  70.700  1.00  0.00
ATOM   5406 C110 DPP   367      24.390  52.652  70.100  1.00  0.00
ATOM   5407 C111 DPP   367      25.620  53.532  69.890  1.00  0.00
ATOM   5408 C112 DPP   367      26.850  53.302  70.770  1.00  0.00
ATOM   5409 C113 DPP   367      27.430  54.562  71.420  1.00  0.00
ATOM   5410 C114 DPP   367      28.440  54.202  72.510  1.00  0.00
ATOM   5411 C115 DPP   367      29.250  55.342  73.120  1.00  0.00
ATOM   5412 C116 DPP   367      29.600  56.382  72.050  1.00  0.00
ATOM   5413  C33 DPP   368       5.010  47.450  86.860  1.00  0.00
ATOM   5414  C34 DPP   368       4.130  48.280  88.940  1.00  0.00
ATOM   5415  C35 DPP   368       4.220  45.990  88.500  1.00  0.00
ATOM   5416  N   DPP   368       4.960  47.250  88.310  1.00  0.00
ATOM   5417  C32 DPP   368       6.200  47.310  89.110  1.00  0.00
ATOM   5418  C31 DPP   368       7.500  47.000  88.360  1.00  0.00
ATOM   5419  O32 DPP   368       7.640  45.610  88.060  1.00  0.00
ATOM   5420  P   DPP   368       8.830  45.130  87.090  1.00  0.00
ATOM   5421  O33 DPP   368       9.140  43.700  87.330  1.00  0.00
ATOM   5422  O34 DPP   368       9.890  46.140  87.340  1.00  0.00
ATOM   5423  O31 DPP   368       8.380  45.310  85.560  1.00  0.00
ATOM   5424  C3  DPP   368       7.680  44.260  84.880  1.00  0.00
ATOM   5425  C2  DPP   368       7.320  44.880  83.530  1.00  0.00
ATOM   5426  O21 DPP   368       6.270  44.150  82.890  1.00  0.00
ATOM   5427  C21 DPP   368       5.060  44.060  83.420  1.00  0.00
ATOM   5428  O22 DPP   368       4.750  44.770  84.370  1.00  0.00
ATOM   5429  C22 DPP   368       4.050  43.360  82.590  1.00  0.00
ATOM   5430  C23 DPP   368       3.470  44.370  81.590  1.00  0.00
ATOM   5431  C24 DPP   368       4.420  44.840  80.480  1.00  0.00
ATOM   5432  C25 DPP   368       3.550  45.260  79.290  1.00  0.00
ATOM   5433  C26 DPP   368       4.230  45.110  77.930  1.00  0.00
ATOM   5434  C27 DPP   368       3.600  46.170  77.020  1.00  0.00
ATOM   5435  C28 DPP   368       3.800  45.730  75.560  1.00  0.00
ATOM   5436  C29 DPP   368       3.780  46.910  74.590  1.00  0.00
ATOM   5437 C210 DPP   368       4.170  46.350  73.220  1.00  0.00
ATOM   5438 C211 DPP   368       3.840  47.360  72.130  1.00  0.00
ATOM   5439 C212 DPP   368       4.460  47.120  70.750  1.00  0.00
ATOM   5440 C213 DPP   368       3.970  48.240  69.820  1.00  0.00
ATOM   5441 C214 DPP   368       4.230  48.100  68.320  1.00  0.00
ATOM   5442 C215 DPP   368       3.770  49.330  67.530  1.00  0.00
ATOM   5443 C216 DPP   368       4.060  49.090  66.050  1.00  0.00
ATOM   5444  C1  DPP   368       8.580  44.980  82.670  1.00  0.00
ATOM   5445  O11 DPP   368       8.470  45.490  81.340  1.00  0.00
ATOM   5446  C11 DPP   368       8.190  46.780  81.220  1.00  0.00
ATOM   5447  O12 DPP   368       8.340  47.570  82.150  1.00  0.00
ATOM   5448  C12 DPP   368       7.640  47.250  79.930  1.00  0.00
ATOM   5449  C13 DPP   368       8.540  47.190  78.690  1.00  0.00
ATOM   5450  C14 DPP   368       7.810  47.400  77.360  1.00  0.00
ATOM   5451  C15 DPP   368       8.910  47.350  76.300  1.00  0.00
ATOM   5452  C16 DPP   368       8.180  47.390  74.960  1.00  0.00
ATOM   5453  C17 DPP   368       9.050  47.440  73.710  1.00  0.00
ATOM   5454  C18 DPP   368       8.090  47.290  72.530  1.00  0.00
ATOM   5455  C19 DPP   368       8.700  47.350  71.120  1.00  0.00
ATOM   5456 C110 DPP   368       9.370  48.600  70.550  1.00  0.00
ATOM   5457 C111 DPP   368      10.130  48.480  69.230  1.00  0.00
ATOM   5458 C112 DPP   368       9.530  47.580  68.150  1.00  0.00
ATOM   5459 C113 DPP   368       8.390  48.340  67.480  1.00  0.00
ATOM   5460 C114 DPP   368       8.270  47.940  66.010  1.00  0.00
ATOM   5461 C115 DPP   368       9.530  47.930  65.140  1.00  0.00
ATOM   5462 C116 DPP   368       9.290  47.390  63.730  1.00  0.00
ATOM   5463  C33 DPP   369      21.460  30.272  87.150  1.00  0.00
ATOM   5464  C34 DPP   369      19.330  31.002  86.510  1.00  0.00
ATOM   5465  C35 DPP   369      19.560  30.172  88.700  1.00  0.00
ATOM   5466  N   DPP   369      20.250  30.942  87.650  1.00  0.00
ATOM   5467  C32 DPP   369      20.450  32.272  88.260  1.00  0.00
ATOM   5468  C31 DPP   369      20.580  33.542  87.430  1.00  0.00
ATOM   5469  O32 DPP   369      21.830  33.562  86.740  1.00  0.00
ATOM   5470  P   DPP   369      22.070  34.572  85.520  1.00  0.00
ATOM   5471  O33 DPP   369      23.370  34.522  84.810  1.00  0.00
ATOM   5472  O34 DPP   369      21.560  35.892  85.970  1.00  0.00
ATOM   5473  O31 DPP   369      21.010  34.082  84.400  1.00  0.00
ATOM   5474  C3  DPP   369      21.340  32.982  83.560  1.00  0.00
ATOM   5475  C2  DPP   369      20.480  33.022  82.290  1.00  0.00
ATOM   5476  O21 DPP   369      21.020  34.072  81.480  1.00  0.00
ATOM   5477  C21 DPP   369      20.700  34.222  80.200  1.00  0.00
ATOM   5478  O22 DPP   369      20.220  33.332  79.510  1.00  0.00
ATOM   5479  C22 DPP   369      21.560  35.312  79.680  1.00  0.00
ATOM   5480  C23 DPP   369      20.820  36.132  78.620  1.00  0.00
ATOM   5481  C24 DPP   369      21.520  37.382  78.080  1.00  0.00
ATOM   5482  C25 DPP   369      20.740  37.872  76.860  1.00  0.00
ATOM   5483  C26 DPP   369      21.120  37.042  75.620  1.00  0.00
ATOM   5484  C27 DPP   369      20.050  37.232  74.540  1.00  0.00
ATOM   5485  C28 DPP   369      20.350  37.092  73.040  1.00  0.00
ATOM   5486  C29 DPP   369      21.170  35.852  72.690  1.00  0.00
ATOM   5487 C210 DPP   369      21.660  35.892  71.240  1.00  0.00
ATOM   5488 C211 DPP   369      22.500  34.692  70.790  1.00  0.00
ATOM   5489 C212 DPP   369      23.060  34.882  69.380  1.00  0.00
ATOM   5490 C213 DPP   369      23.530  33.642  68.620  1.00  0.00
ATOM   5491 C214 DPP   369      24.470  32.772  69.460  1.00  0.00
ATOM   5492 C215 DPP   369      25.070  31.662  68.600  1.00  0.00
ATOM   5493 C216 DPP   369      26.130  32.132  67.600  1.00  0.00
ATOM   5494  C1  DPP   369      19.010  33.162  82.690  1.00  0.00
ATOM   5495  O11 DPP   369      18.100  32.732  81.680  1.00  0.00
ATOM   5496  C11 DPP   369      17.420  31.592  81.710  1.00  0.00
ATOM   5497  O12 DPP   369      17.780  30.702  82.470  1.00  0.00
ATOM   5498  C12 DPP   369      16.570  31.592  80.500  1.00  0.00
ATOM   5499  C13 DPP   369      17.000  30.602  79.420  1.00  0.00
ATOM   5500  C14 DPP   369      16.160  30.832  78.160  1.00  0.00
ATOM   5501  C15 DPP   369      16.830  30.262  76.910  1.00  0.00
ATOM   5502  C16 DPP   369      15.900  30.122  75.700  1.00  0.00
ATOM   5503  C17 DPP   369      16.510  29.472  74.460  1.00  0.00
ATOM   5504  C18 DPP   369      15.520  29.612  73.300  1.00  0.00
ATOM   5505  C19 DPP   369      16.240  29.222  72.000  1.00  0.00
ATOM   5506 C110 DPP   369      15.410  29.582  70.770  1.00  0.00
ATOM   5507 C111 DPP   369      16.080  28.832  69.620  1.00  0.00
ATOM   5508 C112 DPP   369      15.710  29.452  68.270  1.00  0.00
ATOM   5509 C113 DPP   369      16.350  28.552  67.210  1.00  0.00
ATOM   5510 C114 DPP   369      15.800  28.962  65.840  1.00  0.00
ATOM   5511 C115 DPP   369      16.190  27.932  64.780  1.00  0.00
ATOM   5512 C116 DPP   369      15.410  28.042  63.470  1.00  0.00
ATOM   5513  C33 DPP   370      11.590  49.680  85.310  1.00  0.00
ATOM   5514  C34 DPP   370      10.250  47.870  84.760  1.00  0.00
ATOM   5515  C35 DPP   370       9.640  49.090  86.690  1.00  0.00
ATOM   5516  N   DPP   370      10.190  49.220  85.330  1.00  0.00
ATOM   5517  C32 DPP   370       9.520  50.240  84.510  1.00  0.00
ATOM   5518  C31 DPP   370       8.120  49.940  83.950  1.00  0.00
ATOM   5519  O32 DPP   370       7.080  49.790  84.920  1.00  0.00
ATOM   5520  P   DPP   370       6.400  50.930  85.820  1.00  0.00
ATOM   5521  O33 DPP   370       7.650  51.290  86.530  1.00  0.00
ATOM   5522  O34 DPP   370       5.350  50.470  86.750  1.00  0.00
ATOM   5523  O31 DPP   370       5.880  52.080  84.810  1.00  0.00
ATOM   5524  C3  DPP   370       4.720  51.650  84.100  1.00  0.00
ATOM   5525  C2  DPP   370       4.220  52.870  83.330  1.00  0.00
ATOM   5526  O21 DPP   370       2.940  52.510  82.800  1.00  0.00
ATOM   5527  C21 DPP   370       2.050  53.430  82.420  1.00  0.00
ATOM   5528  O22 DPP   370       2.400  54.600  82.490  1.00  0.00
ATOM   5529  C22 DPP   370       0.770  52.780  82.080  1.00  0.00
ATOM   5530  C23 DPP   370       0.260  52.590  80.640  1.00  0.00
ATOM   5531  C24 DPP   370       1.350  51.990  79.750  1.00  0.00
ATOM   5532  C25 DPP   370       0.890  51.880  78.290  1.00  0.00
ATOM   5533  C26 DPP   370       0.820  53.290  77.690  1.00  0.00
ATOM   5534  C27 DPP   370      76.928  53.460  76.490  1.00  0.00
ATOM   5535  C28 DPP   370       0.420  52.810  75.200  1.00  0.00
ATOM   5536  C29 DPP   370      76.508  53.280  74.080  1.00  0.00
ATOM   5537 C210 DPP   370       0.200  53.380  72.740  1.00  0.00
ATOM   5538 C211 DPP   370      76.278  53.820  71.610  1.00  0.00
ATOM   5539 C212 DPP   370       0.030  54.240  70.370  1.00  0.00
ATOM   5540 C213 DPP   370       0.680  53.020  69.720  1.00  0.00
ATOM   5541 C214 DPP   370       1.280  53.510  68.410  1.00  0.00
ATOM   5542 C215 DPP   370       2.430  54.500  68.670  1.00  0.00
ATOM   5543 C216 DPP   370       3.020  54.870  67.310  1.00  0.00
ATOM   5544  C1  DPP   370       5.280  53.050  82.240  1.00  0.00
ATOM   5545  O11 DPP   370       4.870  53.900  81.170  1.00  0.00
ATOM   5546  C11 DPP   370       5.450  53.900  79.980  1.00  0.00
ATOM   5547  O12 DPP   370       6.390  53.150  79.750  1.00  0.00
ATOM   5548  C12 DPP   370       4.960  54.870  78.970  1.00  0.00
ATOM   5549  C13 DPP   370       4.910  54.400  77.510  1.00  0.00
ATOM   5550  C14 DPP   370       4.460  55.580  76.650  1.00  0.00
ATOM   5551  C15 DPP   370       5.090  55.280  75.290  1.00  0.00
ATOM   5552  C16 DPP   370       4.560  56.130  74.130  1.00  0.00
ATOM   5553  C17 DPP   370       5.000  55.710  72.720  1.00  0.00
ATOM   5554  C18 DPP   370       4.580  56.670  71.600  1.00  0.00
ATOM   5555  C19 DPP   370       5.490  56.120  70.500  1.00  0.00
ATOM   5556 C110 DPP   370       5.440  57.130  69.350  1.00  0.00
ATOM   5557 C111 DPP   370       6.560  56.830  68.350  1.00  0.00
ATOM   5558 C112 DPP   370       6.650  57.870  67.240  1.00  0.00
ATOM   5559 C113 DPP   370       7.750  57.380  66.290  1.00  0.00
ATOM   5560 C114 DPP   370       7.960  58.080  64.950  1.00  0.00
ATOM   5561 C115 DPP   370       9.300  57.720  64.320  1.00  0.00
ATOM   5562 C116 DPP   370       9.360  58.530  63.030  1.00  0.00
ATOM   5563  C33 DPP   371      36.070  67.730  64.210  1.00  0.00
ATOM   5564  C34 DPP   371      37.790  68.100  62.620  1.00  0.00
ATOM   5565  C35 DPP   371      37.510  65.950  63.760  1.00  0.00
ATOM   5566  N   DPP   371      36.840  67.100  63.130  1.00  0.00
ATOM   5567  C32 DPP   371      35.790  66.550  62.260  1.00  0.00
ATOM   5568  C31 DPP   371      36.330  66.060  60.920  1.00  0.00
ATOM   5569  O32 DPP   371      36.770  67.070  60.010  1.00  0.00
ATOM   5570  P   DPP   371      37.440  66.890  58.550  1.00  0.00
ATOM   5571  O33 DPP   371      36.810  67.780  57.550  1.00  0.00
ATOM   5572  O34 DPP   371      37.550  65.460  58.200  1.00  0.00
ATOM   5573  O31 DPP   371      38.950  67.400  58.750  1.00  0.00
ATOM   5574  C3  DPP   371      39.290  68.750  59.080  1.00  0.00
ATOM   5575  C2  DPP   371      40.800  68.950  59.230  1.00  0.00
ATOM   5576  O21 DPP   371      41.060  70.320  59.550  1.00  0.00
ATOM   5577  C21 DPP   371      40.930  70.660  60.830  1.00  0.00
ATOM   5578  O22 DPP   371      40.730  69.880  61.750  1.00  0.00
ATOM   5579  C22 DPP   371      41.150  72.110  61.020  1.00  0.00
ATOM   5580  C23 DPP   371      39.900  72.740  61.640  1.00  0.00
ATOM   5581  C24 DPP   371      40.210  74.120  62.210  1.00  0.00
ATOM   5582  C25 DPP   371      38.910  74.910  62.390  1.00  0.00
ATOM   5583  C26 DPP   371      39.220  76.330  62.890  1.00  0.00
ATOM   5584  C27 DPP   371      38.000  76.940  63.590  1.00  0.00
ATOM   5585  C28 DPP   371      38.320   1.122  64.480  1.00  0.00
ATOM   5586  C29 DPP   371      39.040   2.222  63.700  1.00  0.00
ATOM   5587 C210 DPP   371      39.110   3.432  64.630  1.00  0.00
ATOM   5588 C211 DPP   371      40.010   3.032  65.800  1.00  0.00
ATOM   5589 C212 DPP   371      39.920   4.142  66.850  1.00  0.00
ATOM   5590 C213 DPP   371      38.470   4.222  67.340  1.00  0.00
ATOM   5591 C214 DPP   371      38.180   5.212  68.470  1.00  0.00
ATOM   5592 C215 DPP   371      36.760   5.712  68.190  1.00  0.00
ATOM   5593 C216 DPP   371      36.580   7.002  69.000  1.00  0.00
ATOM   5594  C1  DPP   371      41.480  68.510  57.930  1.00  0.00
ATOM   5595  O11 DPP   371      42.890  68.380  58.120  1.00  0.00
ATOM   5596  C11 DPP   371      43.600  67.900  57.100  1.00  0.00
ATOM   5597  O12 DPP   371      43.160  67.090  56.280  1.00  0.00
ATOM   5598  C12 DPP   371      45.030  68.010  57.460  1.00  0.00
ATOM   5599  C13 DPP   371      45.880  67.030  56.650  1.00  0.00
ATOM   5600  C14 DPP   371      47.380  67.320  56.620  1.00  0.00
ATOM   5601  C15 DPP   371      47.770  68.620  55.930  1.00  0.00
ATOM   5602  C16 DPP   371      49.150  69.200  56.220  1.00  0.00
ATOM   5603  C17 DPP   371      49.180  69.860  57.600  1.00  0.00
ATOM   5604  C18 DPP   371      50.470  70.590  58.000  1.00  0.00
ATOM   5605  C19 DPP   371      51.730  69.730  57.870  1.00  0.00
ATOM   5606 C110 DPP   371      52.950  70.500  58.390  1.00  0.00
ATOM   5607 C111 DPP   371      52.980  70.680  59.900  1.00  0.00
ATOM   5608 C112 DPP   371      53.920  69.760  60.680  1.00  0.00
ATOM   5609 C113 DPP   371      54.800  70.260  61.830  1.00  0.00
ATOM   5610 C114 DPP   371      55.590  69.120  62.480  1.00  0.00
ATOM   5611 C115 DPP   371      54.870  67.850  62.930  1.00  0.00
ATOM   5612 C116 DPP   371      53.990  68.000  64.180  1.00  0.00
ATOM   5613  C33 DPP   372      17.550  23.852  89.980  1.00  0.00
ATOM   5614  C34 DPP   372      19.910  23.812  89.700  1.00  0.00
ATOM   5615  C35 DPP   372      18.860  21.752  89.920  1.00  0.00
ATOM   5616  N   DPP   372      18.660  23.102  89.370  1.00  0.00
ATOM   5617  C32 DPP   372      18.640  23.212  87.910  1.00  0.00
ATOM   5618  C31 DPP   372      17.780  22.142  87.220  1.00  0.00
ATOM   5619  O32 DPP   372      16.360  22.192  87.350  1.00  0.00
ATOM   5620  P   DPP   372      15.510  20.912  87.830  1.00  0.00
ATOM   5621  O33 DPP   372      14.360  21.552  88.500  1.00  0.00
ATOM   5622  O34 DPP   372      16.390  20.012  88.610  1.00  0.00
ATOM   5623  O31 DPP   372      15.050  20.152  86.480  1.00  0.00
ATOM   5624  C3  DPP   372      15.970  19.362  85.720  1.00  0.00
ATOM   5625  C2  DPP   372      15.400  18.892  84.380  1.00  0.00
ATOM   5626  O21 DPP   372      16.390  18.082  83.750  1.00  0.00
ATOM   5627  C21 DPP   372      16.460  16.762  83.950  1.00  0.00
ATOM   5628  O22 DPP   372      15.720  16.102  84.680  1.00  0.00
ATOM   5629  C22 DPP   372      17.570  16.162  83.180  1.00  0.00
ATOM   5630  C23 DPP   372      17.090  15.402  81.940  1.00  0.00
ATOM   5631  C24 DPP   372      16.680  16.262  80.730  1.00  0.00
ATOM   5632  C25 DPP   372      17.580  17.372  80.190  1.00  0.00
ATOM   5633  C26 DPP   372      18.500  17.152  79.000  1.00  0.00
ATOM   5634  C27 DPP   372      17.700  17.062  77.700  1.00  0.00
ATOM   5635  C28 DPP   372      18.740  16.692  76.640  1.00  0.00
ATOM   5636  C29 DPP   372      18.070  16.432  75.290  1.00  0.00
ATOM   5637 C210 DPP   372      19.010  16.302  74.090  1.00  0.00
ATOM   5638 C211 DPP   372      18.460  16.452  72.670  1.00  0.00
ATOM   5639 C212 DPP   372      19.540  16.262  71.600  1.00  0.00
ATOM   5640 C213 DPP   372      19.080  16.702  70.210  1.00  0.00
ATOM   5641 C214 DPP   372      20.070  16.232  69.140  1.00  0.00
ATOM   5642 C215 DPP   372      19.810  16.932  67.800  1.00  0.00
ATOM   5643 C216 DPP   372      20.970  16.912  66.800  1.00  0.00
ATOM   5644  C1  DPP   372      14.830  19.962  83.450  1.00  0.00
ATOM   5645  O11 DPP   372      14.550  19.542  82.120  1.00  0.00
ATOM   5646  C11 DPP   372      14.430  20.492  81.200  1.00  0.00
ATOM   5647  O12 DPP   372      14.570  21.672  81.510  1.00  0.00
ATOM   5648  C12 DPP   372      13.970  19.952  79.900  1.00  0.00
ATOM   5649  C13 DPP   372      14.500  20.772  78.720  1.00  0.00
ATOM   5650  C14 DPP   372      14.350  20.002  77.400  1.00  0.00
ATOM   5651  C15 DPP   372      14.930  20.652  76.150  1.00  0.00
ATOM   5652  C16 DPP   372      14.950  19.682  74.960  1.00  0.00
ATOM   5653  C17 DPP   372      15.400  20.432  73.710  1.00  0.00
ATOM   5654  C18 DPP   372      15.400  19.342  72.630  1.00  0.00
ATOM   5655  C19 DPP   372      15.780  19.942  71.270  1.00  0.00
ATOM   5656 C110 DPP   372      15.620  19.032  70.050  1.00  0.00
ATOM   5657 C111 DPP   372      15.980  19.712  68.720  1.00  0.00
ATOM   5658 C112 DPP   372      16.060  18.632  67.640  1.00  0.00
ATOM   5659 C113 DPP   372      16.520  19.332  66.350  1.00  0.00
ATOM   5660 C114 DPP   372      16.840  18.182  65.390  1.00  0.00
ATOM   5661 C115 DPP   372      15.690  17.392  64.770  1.00  0.00
ATOM   5662 C116 DPP   372      14.890  18.242  63.790  1.00  0.00
ATOM   5663  C33 DPP   373      31.660  67.430  66.940  1.00  0.00
ATOM   5664  C34 DPP   373      32.320  68.790  68.680  1.00  0.00
ATOM   5665  C35 DPP   373      33.840  68.620  66.970  1.00  0.00
ATOM   5666  N   DPP   373      32.390  68.680  67.210  1.00  0.00
ATOM   5667  C32 DPP   373      31.740  69.870  66.660  1.00  0.00
ATOM   5668  C31 DPP   373      31.400  69.730  65.170  1.00  0.00
ATOM   5669  O32 DPP   373      32.420  69.460  64.210  1.00  0.00
ATOM   5670  P   DPP   373      32.310  68.210  63.200  1.00  0.00
ATOM   5671  O33 DPP   373      32.100  67.060  64.100  1.00  0.00
ATOM   5672  O34 DPP   373      33.560  68.150  62.410  1.00  0.00
ATOM   5673  O31 DPP   373      31.150  68.480  62.110  1.00  0.00
ATOM   5674  C3  DPP   373      29.770  68.100  62.090  1.00  0.00
ATOM   5675  C2  DPP   373      29.610  66.720  61.460  1.00  0.00
ATOM   5676  O21 DPP   373      28.370  66.630  60.770  1.00  0.00
ATOM   5677  C21 DPP   373      28.310  66.110  59.550  1.00  0.00
ATOM   5678  O22 DPP   373      29.310  65.980  58.840  1.00  0.00
ATOM   5679  C22 DPP   373      26.930  65.960  59.030  1.00  0.00
ATOM   5680  C23 DPP   373      26.530  64.500  58.840  1.00  0.00
ATOM   5681  C24 DPP   373      25.970  63.990  60.170  1.00  0.00
ATOM   5682  C25 DPP   373      24.590  64.570  60.490  1.00  0.00
ATOM   5683  C26 DPP   373      23.970  63.960  61.750  1.00  0.00
ATOM   5684  C27 DPP   373      24.580  64.440  63.070  1.00  0.00
ATOM   5685  C28 DPP   373      23.910  63.730  64.250  1.00  0.00
ATOM   5686  C29 DPP   373      22.430  64.090  64.420  1.00  0.00
ATOM   5687 C210 DPP   373      21.820  63.190  65.490  1.00  0.00
ATOM   5688 C211 DPP   373      20.540  63.770  66.090  1.00  0.00
ATOM   5689 C212 DPP   373      19.340  63.430  65.210  1.00  0.00
ATOM   5690 C213 DPP   373      19.030  61.960  64.930  1.00  0.00
ATOM   5691 C214 DPP   373      18.450  61.400  66.230  1.00  0.00
ATOM   5692 C215 DPP   373      17.000  61.650  66.650  1.00  0.00
ATOM   5693 C216 DPP   373      16.710  61.370  68.130  1.00  0.00
ATOM   5694  C1  DPP   373      29.950  65.620  62.470  1.00  0.00
ATOM   5695  O11 DPP   373      29.340  65.790  63.750  1.00  0.00
ATOM   5696  C11 DPP   373      29.320  64.830  64.660  1.00  0.00
ATOM   5697  O12 DPP   373      29.840  63.720  64.530  1.00  0.00
ATOM   5698  C12 DPP   373      28.590  65.330  65.840  1.00  0.00
ATOM   5699  C13 DPP   373      28.970  64.560  67.110  1.00  0.00
ATOM   5700  C14 DPP   373      28.170  63.270  67.300  1.00  0.00
ATOM   5701  C15 DPP   373      28.870  62.470  68.400  1.00  0.00
ATOM   5702  C16 DPP   373      28.450  61.010  68.240  1.00  0.00
ATOM   5703  C17 DPP   373      26.970  60.700  68.460  1.00  0.00
ATOM   5704  C18 DPP   373      26.570  59.250  68.730  1.00  0.00
ATOM   5705  C19 DPP   373      25.140  59.280  69.270  1.00  0.00
ATOM   5706 C110 DPP   373      24.310  58.010  69.070  1.00  0.00
ATOM   5707 C111 DPP   373      23.210  57.850  70.120  1.00  0.00
ATOM   5708 C112 DPP   373      22.460  56.520  70.020  1.00  0.00
ATOM   5709 C113 DPP   373      21.390  56.540  68.910  1.00  0.00
ATOM   5710 C114 DPP   373      20.400  55.370  68.880  1.00  0.00
ATOM   5711 C115 DPP   373      21.060  54.070  68.400  1.00  0.00
ATOM   5712 C116 DPP   373      19.920  53.050  68.490  1.00  0.00
ATOM   5713  C33 DPP   374      11.340  41.000  39.610  1.00  0.00
ATOM   5714  C34 DPP   374       9.370  42.120  39.310  1.00  0.00
ATOM   5715  C35 DPP   374      10.440  42.040  41.550  1.00  0.00
ATOM   5716  N   DPP   374      10.610  42.180  40.100  1.00  0.00
ATOM   5717  C32 DPP   374      11.250  43.480  39.830  1.00  0.00
ATOM   5718  C31 DPP   374      12.610  43.790  40.460  1.00  0.00
ATOM   5719  O32 DPP   374      13.710  42.900  40.240  1.00  0.00
ATOM   5720  P   DPP   374      14.700  42.190  41.300  1.00  0.00
ATOM   5721  O33 DPP   374      15.580  43.150  41.990  1.00  0.00
ATOM   5722  O34 DPP   374      15.310  40.970  40.710  1.00  0.00
ATOM   5723  O31 DPP   374      13.540  41.720  42.310  1.00  0.00
ATOM   5724  C3  DPP   374      13.600  41.260  43.670  1.00  0.00
ATOM   5725  C2  DPP   374      14.130  42.280  44.680  1.00  0.00
ATOM   5726  O21 DPP   374      14.230  41.650  45.960  1.00  0.00
ATOM   5727  C21 DPP   374      15.420  41.230  46.380  1.00  0.00
ATOM   5728  O22 DPP   374      16.430  41.300  45.680  1.00  0.00
ATOM   5729  C22 DPP   374      15.290  40.320  47.540  1.00  0.00
ATOM   5730  C23 DPP   374      15.680  41.150  48.760  1.00  0.00
ATOM   5731  C24 DPP   374      14.560  41.140  49.800  1.00  0.00
ATOM   5732  C25 DPP   374      14.580  42.210  50.890  1.00  0.00
ATOM   5733  C26 DPP   374      13.700  41.780  52.070  1.00  0.00
ATOM   5734  C27 DPP   374      12.260  42.250  51.890  1.00  0.00
ATOM   5735  C28 DPP   374      11.470  41.980  53.170  1.00  0.00
ATOM   5736  C29 DPP   374       9.990  42.350  53.240  1.00  0.00
ATOM   5737 C210 DPP   374       9.390  41.680  54.480  1.00  0.00
ATOM   5738 C211 DPP   374       9.050  40.190  54.460  1.00  0.00
ATOM   5739 C212 DPP   374       8.200  40.000  55.720  1.00  0.00
ATOM   5740 C213 DPP   374       7.890  38.510  55.810  1.00  0.00
ATOM   5741 C214 DPP   374       9.090  37.570  55.850  1.00  0.00
ATOM   5742 C215 DPP   374       8.850  36.070  56.020  1.00  0.00
ATOM   5743 C216 DPP   374       8.130  35.330  54.880  1.00  0.00
ATOM   5744  C1  DPP   374      13.150  43.460  44.760  1.00  0.00
ATOM   5745  O11 DPP   374      13.820  44.590  45.320  1.00  0.00
ATOM   5746  C11 DPP   374      13.080  45.630  45.710  1.00  0.00
ATOM   5747  O12 DPP   374      11.940  45.870  45.320  1.00  0.00
ATOM   5748  C12 DPP   374      13.940  46.630  46.380  1.00  0.00
ATOM   5749  C13 DPP   374      14.000  46.830  47.890  1.00  0.00
ATOM   5750  C14 DPP   374      13.820  45.520  48.670  1.00  0.00
ATOM   5751  C15 DPP   374      14.460  45.630  50.050  1.00  0.00
ATOM   5752  C16 DPP   374      13.330  46.220  50.890  1.00  0.00
ATOM   5753  C17 DPP   374      13.730  46.610  52.310  1.00  0.00
ATOM   5754  C18 DPP   374      12.540  47.040  53.160  1.00  0.00
ATOM   5755  C19 DPP   374      12.990  47.260  54.610  1.00  0.00
ATOM   5756 C110 DPP   374      11.890  47.210  55.680  1.00  0.00
ATOM   5757 C111 DPP   374      11.290  45.820  55.900  1.00  0.00
ATOM   5758 C112 DPP   374       9.930  45.980  56.580  1.00  0.00
ATOM   5759 C113 DPP   374       9.460  44.690  57.260  1.00  0.00
ATOM   5760 C114 DPP   374      10.450  44.090  58.240  1.00  0.00
ATOM   5761 C115 DPP   374       9.700  42.990  59.000  1.00  0.00
ATOM   5762 C116 DPP   374      10.660  42.190  59.880  1.00  0.00
ATOM   5763  C33 DPP   375      75.070  54.840  43.490  1.00  0.00
ATOM   5764  C34 DPP   375       0.392  54.410  43.180  1.00  0.00
ATOM   5765  C35 DPP   375      75.800  53.970  41.450  1.00  0.00
ATOM   5766  N   DPP   375      76.180  54.890  42.530  1.00  0.00
ATOM   5767  C32 DPP   375      76.420  56.240  42.010  1.00  0.00
ATOM   5768  C31 DPP   375       0.032  56.500  40.650  1.00  0.00
ATOM   5769  O32 DPP   375       1.382  56.040  40.660  1.00  0.00
ATOM   5770  P   DPP   375       2.592  56.880  40.010  1.00  0.00
ATOM   5771  O33 DPP   375       2.072  57.460  38.760  1.00  0.00
ATOM   5772  O34 DPP   375       3.872  56.130  40.020  1.00  0.00
ATOM   5773  O31 DPP   375       2.652  58.090  41.080  1.00  0.00
ATOM   5774  C3  DPP   375       3.632  58.200  42.120  1.00  0.00
ATOM   5775  C2  DPP   375       2.982  58.860  43.340  1.00  0.00
ATOM   5776  O21 DPP   375       3.992  59.320  44.240  1.00  0.00
ATOM   5777  C21 DPP   375       3.722  60.350  45.040  1.00  0.00
ATOM   5778  O22 DPP   375       2.592  60.830  45.050  1.00  0.00
ATOM   5779  C22 DPP   375       4.842  60.790  45.900  1.00  0.00
ATOM   5780  C23 DPP   375       4.582  61.310  47.310  1.00  0.00
ATOM   5781  C24 DPP   375       3.472  60.600  48.100  1.00  0.00
ATOM   5782  C25 DPP   375       3.652  60.720  49.610  1.00  0.00
ATOM   5783  C26 DPP   375       4.882  59.980  50.160  1.00  0.00
ATOM   5784  C27 DPP   375       5.312  60.510  51.520  1.00  0.00
ATOM   5785  C28 DPP   375       4.402  60.030  52.650  1.00  0.00
ATOM   5786  C29 DPP   375       4.822  60.290  54.100  1.00  0.00
ATOM   5787 C210 DPP   375       3.682  60.130  55.100  1.00  0.00
ATOM   5788 C211 DPP   375       4.102  60.390  56.550  1.00  0.00
ATOM   5789 C212 DPP   375       4.612  59.080  57.160  1.00  0.00
ATOM   5790 C213 DPP   375       4.972  59.140  58.640  1.00  0.00
ATOM   5791 C214 DPP   375       5.772  60.360  59.100  1.00  0.00
ATOM   5792 C215 DPP   375       5.732  60.290  60.630  1.00  0.00
ATOM   5793 C216 DPP   375       6.582  61.390  61.280  1.00  0.00
ATOM   5794  C1  DPP   375       1.992  57.860  43.940  1.00  0.00
ATOM   5795  O11 DPP   375       1.252  58.360  45.050  1.00  0.00
ATOM   5796  C11 DPP   375       0.352  57.610  45.680  1.00  0.00
ATOM   5797  O12 DPP   375       0.372  56.390  45.550  1.00  0.00
ATOM   5798  C12 DPP   375      76.650  58.450  46.650  1.00  0.00
ATOM   5799  C13 DPP   375      75.870  57.700  47.730  1.00  0.00
ATOM   5800  C14 DPP   375      75.450  58.470  48.990  1.00  0.00
ATOM   5801  C15 DPP   375      74.490  57.690  49.880  1.00  0.00
ATOM   5802  C16 DPP   375      74.050  58.420  51.150  1.00  0.00
ATOM   5803  C17 DPP   375      73.090  57.570  51.980  1.00  0.00
ATOM   5804  C18 DPP   375      72.510  58.100  53.290  1.00  0.00
ATOM   5805  C19 DPP   375      71.520  57.080  53.850  1.00  0.00
ATOM   5806 C110 DPP   375      70.880  57.490  55.180  1.00  0.00
ATOM   5807 C111 DPP   375      72.000  57.470  56.220  1.00  0.00
ATOM   5808 C112 DPP   375      71.440  57.080  57.590  1.00  0.00
ATOM   5809 C113 DPP   375      72.610  56.860  58.550  1.00  0.00
ATOM   5810 C114 DPP   375      72.190  56.270  59.900  1.00  0.00
ATOM   5811 C115 DPP   375      73.350  56.340  60.900  1.00  0.00
ATOM   5812 C116 DPP   375      73.040  55.840  62.310  1.00  0.00
ATOM   5813  C33 DPP   376      11.340  46.980  42.280  1.00  0.00
ATOM   5814  C34 DPP   376       9.440  46.930  43.620  1.00  0.00
ATOM   5815  C35 DPP   376      10.620  49.090  43.280  1.00  0.00
ATOM   5816  N   DPP   376      10.200  47.800  42.710  1.00  0.00
ATOM   5817  C32 DPP   376       9.360  47.950  41.510  1.00  0.00
ATOM   5818  C31 DPP   376       8.220  48.960  41.580  1.00  0.00
ATOM   5819  O32 DPP   376       8.700  50.270  41.280  1.00  0.00
ATOM   5820  P   DPP   376       7.550  51.360  41.040  1.00  0.00
ATOM   5821  O33 DPP   376       6.610  50.730  40.080  1.00  0.00
ATOM   5822  O34 DPP   376       8.060  52.660  40.560  1.00  0.00
ATOM   5823  O31 DPP   376       6.980  51.510  42.540  1.00  0.00
ATOM   5824  C3  DPP   376       7.520  52.400  43.520  1.00  0.00
ATOM   5825  C2  DPP   376       6.630  53.080  44.560  1.00  0.00
ATOM   5826  O21 DPP   376       5.740  52.140  45.190  1.00  0.00
ATOM   5827  C21 DPP   376       6.210  51.530  46.280  1.00  0.00
ATOM   5828  O22 DPP   376       7.420  51.430  46.450  1.00  0.00
ATOM   5829  C22 DPP   376       5.220  50.730  47.030  1.00  0.00
ATOM   5830  C23 DPP   376       4.930  51.250  48.440  1.00  0.00
ATOM   5831  C24 DPP   376       4.040  50.200  49.120  1.00  0.00
ATOM   5832  C25 DPP   376       3.390  50.860  50.340  1.00  0.00
ATOM   5833  C26 DPP   376       3.050  50.110  51.630  1.00  0.00
ATOM   5834  C27 DPP   376       2.530  51.050  52.730  1.00  0.00
ATOM   5835  C28 DPP   376       1.740  50.230  53.750  1.00  0.00
ATOM   5836  C29 DPP   376       1.150  51.090  54.870  1.00  0.00
ATOM   5837 C210 DPP   376       0.180  52.050  54.180  1.00  0.00
ATOM   5838 C211 DPP   376      76.558  53.020  55.180  1.00  0.00
ATOM   5839 C212 DPP   376      75.778  52.440  56.370  1.00  0.00
ATOM   5840 C213 DPP   376      75.768  53.610  57.360  1.00  0.00
ATOM   5841 C214 DPP   376      74.898  53.330  58.580  1.00  0.00
ATOM   5842 C215 DPP   376      75.938  52.960  59.640  1.00  0.00
ATOM   5843 C216 DPP   376      75.378  52.300  60.900  1.00  0.00
ATOM   5844  C1  DPP   376       5.860  54.190  43.840  1.00  0.00
ATOM   5845  O11 DPP   376       5.270  55.050  44.820  1.00  0.00
ATOM   5846  C11 DPP   376       3.980  54.920  45.100  1.00  0.00
ATOM   5847  O12 DPP   376       3.160  54.580  44.250  1.00  0.00
ATOM   5848  C12 DPP   376       3.560  55.600  46.340  1.00  0.00
ATOM   5849  C13 DPP   376       2.940  54.630  47.350  1.00  0.00
ATOM   5850  C14 DPP   376       2.390  55.500  48.480  1.00  0.00
ATOM   5851  C15 DPP   376       2.080  54.760  49.780  1.00  0.00
ATOM   5852  C16 DPP   376       1.650  55.830  50.790  1.00  0.00
ATOM   5853  C17 DPP   376       1.000  55.490  52.130  1.00  0.00
ATOM   5854  C18 DPP   376       0.990  56.820  52.880  1.00  0.00
ATOM   5855  C19 DPP   376       0.270  56.560  54.200  1.00  0.00
ATOM   5856 C110 DPP   376      76.848  57.720  55.090  1.00  0.00
ATOM   5857 C111 DPP   376      76.478  57.320  56.520  1.00  0.00
ATOM   5858 C112 DPP   376       0.720  57.370  57.370  1.00  0.00
ATOM   5859 C113 DPP   376       0.390  56.770  58.740  1.00  0.00
ATOM   5860 C114 DPP   376       1.610  56.410  59.590  1.00  0.00
ATOM   5861 C115 DPP   376       1.150  55.770  60.900  1.00  0.00
ATOM   5862 C116 DPP   376       2.100  54.910  61.740  1.00  0.00
ATOM   5863  C33 DPP   377      15.580  45.730  40.490  1.00  0.00
ATOM   5864  C34 DPP   377      17.890  45.160  40.820  1.00  0.00
ATOM   5865  C35 DPP   377      17.180  47.390  40.190  1.00  0.00
ATOM   5866  N   DPP   377      16.870  46.200  41.000  1.00  0.00
ATOM   5867  C32 DPP   377      16.910  46.420  42.450  1.00  0.00
ATOM   5868  C31 DPP   377      15.900  47.390  43.070  1.00  0.00
ATOM   5869  O32 DPP   377      16.120  48.710  42.570  1.00  0.00
ATOM   5870  P   DPP   377      14.810  49.560  42.190  1.00  0.00
ATOM   5871  O33 DPP   377      13.820  48.720  41.480  1.00  0.00
ATOM   5872  O34 DPP   377      15.160  50.820  41.500  1.00  0.00
ATOM   5873  O31 DPP   377      13.990  50.010  43.510  1.00  0.00
ATOM   5874  C3  DPP   377      14.430  51.030  44.400  1.00  0.00
ATOM   5875  C2  DPP   377      13.260  51.420  45.310  1.00  0.00
ATOM   5876  O21 DPP   377      13.630  52.420  46.260  1.00  0.00
ATOM   5877  C21 DPP   377      13.070  53.630  46.290  1.00  0.00
ATOM   5878  O22 DPP   377      12.430  54.090  45.350  1.00  0.00
ATOM   5879  C22 DPP   377      13.700  54.500  47.310  1.00  0.00
ATOM   5880  C23 DPP   377      12.800  54.840  48.500  1.00  0.00
ATOM   5881  C24 DPP   377      12.650  53.750  49.570  1.00  0.00
ATOM   5882  C25 DPP   377      11.990  54.320  50.820  1.00  0.00
ATOM   5883  C26 DPP   377      11.870  53.310  51.960  1.00  0.00
ATOM   5884  C27 DPP   377      11.310  54.000  53.200  1.00  0.00
ATOM   5885  C28 DPP   377      11.010  52.930  54.250  1.00  0.00
ATOM   5886  C29 DPP   377      11.010  53.470  55.680  1.00  0.00
ATOM   5887 C210 DPP   377      10.460  52.420  56.650  1.00  0.00
ATOM   5888 C211 DPP   377      11.570  51.530  57.230  1.00  0.00
ATOM   5889 C212 DPP   377      11.050  50.330  58.020  1.00  0.00
ATOM   5890 C213 DPP   377      10.200  50.780  59.210  1.00  0.00
ATOM   5891 C214 DPP   377       9.980  49.780  60.350  1.00  0.00
ATOM   5892 C215 DPP   377       9.200  50.340  61.530  1.00  0.00
ATOM   5893 C216 DPP   377      10.160  51.290  62.260  1.00  0.00
ATOM   5894  C1  DPP   377      12.850  50.140  46.040  1.00  0.00
ATOM   5895  O11 DPP   377      11.600  50.400  46.680  1.00  0.00
ATOM   5896  C11 DPP   377      10.870  49.340  47.030  1.00  0.00
ATOM   5897  O12 DPP   377      10.970  48.220  46.530  1.00  0.00
ATOM   5898  C12 DPP   377       9.700  49.770  47.820  1.00  0.00
ATOM   5899  C13 DPP   377      10.070  49.690  49.300  1.00  0.00
ATOM   5900  C14 DPP   377       8.860  49.950  50.210  1.00  0.00
ATOM   5901  C15 DPP   377       9.030  49.880  51.720  1.00  0.00
ATOM   5902  C16 DPP   377       7.580  49.580  52.120  1.00  0.00
ATOM   5903  C17 DPP   377       7.380  49.010  53.520  1.00  0.00
ATOM   5904  C18 DPP   377       7.140  50.200  54.460  1.00  0.00
ATOM   5905  C19 DPP   377       6.680  49.810  55.870  1.00  0.00
ATOM   5906 C110 DPP   377       5.320  49.120  55.920  1.00  0.00
ATOM   5907 C111 DPP   377       4.990  48.840  57.380  1.00  0.00
ATOM   5908 C112 DPP   377       5.860  47.720  57.950  1.00  0.00
ATOM   5909 C113 DPP   377       5.440  47.410  59.380  1.00  0.00
ATOM   5910 C114 DPP   377       6.430  46.380  59.920  1.00  0.00
ATOM   5911 C115 DPP   377       5.980  45.890  61.300  1.00  0.00
ATOM   5912 C116 DPP   377       4.610  45.210  61.240  1.00  0.00
ATOM   5913  C33 DPP   378       5.360  33.522  40.930  1.00  0.00
ATOM   5914  C34 DPP   378       5.630  35.502  42.210  1.00  0.00
ATOM   5915  C35 DPP   378       7.450  34.122  41.770  1.00  0.00
ATOM   5916  N   DPP   378       6.240  34.672  41.150  1.00  0.00
ATOM   5917  C32 DPP   378       6.500  35.272  39.840  1.00  0.00
ATOM   5918  C31 DPP   378       7.570  36.352  39.630  1.00  0.00
ATOM   5919  O32 DPP   378       7.340  37.562  40.360  1.00  0.00
ATOM   5920  P   DPP   378       8.460  38.712  40.470  1.00  0.00
ATOM   5921  O33 DPP   378       7.920  39.822  41.300  1.00  0.00
ATOM   5922  O34 DPP   378       8.870  39.062  39.100  1.00  0.00
ATOM   5923  O31 DPP   378       9.680  38.152  41.360  1.00  0.00
ATOM   5924  C3  DPP   378       9.950  38.402  42.740  1.00  0.00
ATOM   5925  C2  DPP   378      10.980  37.332  43.100  1.00  0.00
ATOM   5926  O21 DPP   378      10.710  36.842  44.420  1.00  0.00
ATOM   5927  C21 DPP   378      10.060  35.692  44.610  1.00  0.00
ATOM   5928  O22 DPP   378       9.860  34.872  43.720  1.00  0.00
ATOM   5929  C22 DPP   378       9.430  35.712  45.950  1.00  0.00
ATOM   5930  C23 DPP   378       9.160  34.302  46.470  1.00  0.00
ATOM   5931  C24 DPP   378       8.960  34.432  47.980  1.00  0.00
ATOM   5932  C25 DPP   378       8.410  33.082  48.440  1.00  0.00
ATOM   5933  C26 DPP   378       9.120  32.472  49.650  1.00  0.00
ATOM   5934  C27 DPP   378       9.870  31.212  49.200  1.00  0.00
ATOM   5935  C28 DPP   378      10.500  30.312  50.250  1.00  0.00
ATOM   5936  C29 DPP   378       9.350  29.642  51.010  1.00  0.00
ATOM   5937 C210 DPP   378       9.740  29.082  52.380  1.00  0.00
ATOM   5938 C211 DPP   378      10.680  27.912  52.060  1.00  0.00
ATOM   5939 C212 DPP   378      11.510  27.252  53.160  1.00  0.00
ATOM   5940 C213 DPP   378      10.620  26.382  54.040  1.00  0.00
ATOM   5941 C214 DPP   378      11.190  26.022  55.420  1.00  0.00
ATOM   5942 C215 DPP   378      10.990  27.272  56.280  1.00  0.00
ATOM   5943 C216 DPP   378      11.980  27.002  57.410  1.00  0.00
ATOM   5944  C1  DPP   378      12.440  37.772  42.970  1.00  0.00
ATOM   5945  O11 DPP   378      13.300  36.892  43.700  1.00  0.00
ATOM   5946  C11 DPP   378      14.090  37.372  44.660  1.00  0.00
ATOM   5947  O12 DPP   378      14.420  38.552  44.730  1.00  0.00
ATOM   5948  C12 DPP   378      14.400  36.402  45.740  1.00  0.00
ATOM   5949  C13 DPP   378      13.380  36.522  46.870  1.00  0.00
ATOM   5950  C14 DPP   378      13.480  35.282  47.770  1.00  0.00
ATOM   5951  C15 DPP   378      12.880  35.272  49.180  1.00  0.00
ATOM   5952  C16 DPP   378      13.040  34.002  50.010  1.00  0.00
ATOM   5953  C17 DPP   378      12.920  34.382  51.480  1.00  0.00
ATOM   5954  C18 DPP   378      12.780  33.122  52.340  1.00  0.00
ATOM   5955  C19 DPP   378      12.440  33.522  53.770  1.00  0.00
ATOM   5956 C110 DPP   378      12.180  32.272  54.620  1.00  0.00
[truncated: 3,582,368 more chars]
